# Supplementary material for: Quantitative dynamic imaging of immune cell signalling using lentiviral gene transfer
Source: Royal Society of Chemistry journal article supplement (doi:10.1039/c5ib00067j), 2015-05-13
Supplement: c5ib00067j2.xlsx [file c5ib00067j2.xlsx]

## Sheet: KEY
Differential gene expression analysis
comparisons between unstimulated and stimulated cells
Sheet	data
WT LipidA Response	wild-type RAW264.7 response to LipidA
H2B LipidA Response	RAW264.7:CH2B response to LipidA
p65 LipidA Response	RAW264.7:CH2B:p65R response to LipidA
Comparison of basal gene expression levels between different cell types
Sheet	data
WTvH2B unstimulated	wild-type vs. RAW264.7:CH2B
H2Bvp65 unstimulated	RAW264.7:CH2B vs. RAW264.7:CH2B:p65
WTvp65 unstimulated	wild-type vs. RAW264.7:CH2B:p65R
Results represent the output from edgeR, where:
logFC	log2 of the fold change between conditions
LogCPM	log2 of counts per million read from sequencing per gene
LR	Likelihood ratio
Pvalue	p-value of the pairwise test
FDR	p-value corrected for false discovery rate
Gene ontology
sheet	data
Gene ontology up regulated	GO enrichments from DAVID from any gene from the three cell types up regulated in response to TNF
Gene ontology down regulated	GO enrichments from DAVID from any gene from the three cell types down regulated in response to TNF

## Sheet: H2B LipidA Reponse
gene	order	genes	logFC	logCPM	LR	PValue	FDR
Il1b	4504	ENSMUSG00000027398	-10.1691	5.64998	1895.96	0	0
Irg1	25002	ENSMUSG00000022126	-6.08049	8.89313	3352.07	0	0
Ccl3	28752	ENSMUSG00000000982	-3.77423	9.13042	1459.34	2.68386340133882e-319	9.99918042872352e-316
Lif	27049	ENSMUSG00000034394	-7.13555	5.63283	1320.21	4.59014e-289	1.2826e-285
Ccl4	28753	ENSMUSG00000018930	-4.67228	7.39422	1265.16	4.21667e-277	9.42595e-274
Il1a	4501	ENSMUSG00000027399	-8.24118	4.41716	1156.23	1.98466e-253	3.6971e-250
Tnfaip2	32475	ENSMUSG00000021281	-2.81322	7.67768	836.35	6.74743e-184	1.07737e-180
Gpr84	33895	ENSMUSG00000063234	-2.57381	7.59304	822.154	8.23163e-181	1.15006e-177
Ccl22	22861	ENSMUSG00000031779	-7.08123	3.80889	793.756	1.22917e-174	1.5265e-171
Ccl5	28747	ENSMUSG00000035042	-6.61993	4.01048	767.894	5.16105e-169	5.7685e-166
Col5a3	25319	ENSMUSG00000004098	-5.39553	4.7149	630.224	4.46826e-139	4.54016e-136
Tnf	35868	ENSMUSG00000024401	-2.89428	8.54094	600.088	1.60207e-132	1.49219e-129
Jdp2	32063	ENSMUSG00000034271	-2.19301	7.77665	557.858	2.4577e-123	2.11306e-120
Fas	38522	ENSMUSG00000024778	-4.92575	3.33887	550.987	7.67848e-122	6.13017e-119
Gm26809	15006	ENSMUSG00000097815	-2.1569	7.49597	546.083	8.95515e-121	6.67278e-118
Csf3	29152	ENSMUSG00000038067	-8.46527	2.55282	498.015	2.56938e-110	1.79487e-107
Traf1	2819	ENSMUSG00000026875	-2.59449	6.3044	496.796	4.73184e-110	3.11105e-107
Slc7a11	8606	ENSMUSG00000027737	-2.19524	7.11552	469.899	3.37096e-104	2.09318e-101
Slfn2	28727	ENSMUSG00000072620	-2.19447	7.88988	453.331	1.35915e-100	7.99538e-98
Cd40	5275	ENSMUSG00000017652	-3.8908	3.55604	446.533	4.0982e-99	2.29028e-96
Ccl9	28748	ENSMUSG00000019122	-1.68517	8.9094	428.769	3.012e-95	1.6031e-92
Tnfaip3	20267	ENSMUSG00000019850	-3.19368	4.15	425.697	1.40432e-94	7.13457e-92
Gm12840	11679	ENSMUSG00000086320	-2.99542	4.12922	418.402	5.43465e-93	2.641e-90
Gadd45b	21019	ENSMUSG00000015312	-2.65806	5.117	406.051	2.65279e-90	1.23543e-87
Cd83	30545	ENSMUSG00000015396	-3.40193	3.9351	399.686	6.44599e-89	2.88187e-86
Tnc	10941	ENSMUSG00000028364	-3.46298	4.14169	366.917	8.77809e-82	3.71068e-79
Nfkb1	9793	ENSMUSG00000028163	-1.6686	8.33614	366.876	8.9638e-82	3.71068e-79
Ikbke	1207	ENSMUSG00000042349	-2.81867	6.39825	352.186	1.41639e-78	5.65394e-76
Nfkbiz	34659	ENSMUSG00000035356	-2.38653	4.79353	345.396	4.26326e-77	1.64312e-74
Pdgfb	33393	ENSMUSG00000000489	-2.16046	8.03075	340.209	5.74609e-76	2.1408e-73
Phlda1	21371	ENSMUSG00000020205	-2.85704	3.94024	314.929	1.84329e-70	6.64597e-68
Tnip1	27843	ENSMUSG00000020400	-1.63681	7.86649	312.211	7.20496e-70	2.51656e-67
Cxcl2	13716	ENSMUSG00000058427	-7.04785	6.80836	310.162	2.01368e-69	6.82026e-67
Timp1	6012	ENSMUSG00000001131	-4.78943	2.88259	296.692	1.73162e-66	5.69244e-64
Pde4b	11370	ENSMUSG00000028525	-2.39019	3.94215	296.446	1.95958e-66	6.25777e-64
Kctd12	24998	ENSMUSG00000098557	-2.58949	5.57115	294.515	5.16123e-66	1.60242e-63
Nlrp3	27978	ENSMUSG00000032691	-1.69869	6.96289	293.838	7.24777e-66	2.18941e-63
Itga5	33897	ENSMUSG00000000555	-1.50474	9.56954	292.929	1.14407e-65	3.36506e-63
Il27	19719	ENSMUSG00000044701	-4.1921	2.6266	287.013	2.22535e-64	6.37763e-62
Pim1	35613	ENSMUSG00000024014	-2.34574	4.54213	285.006	6.09205e-64	1.70227e-61
Clec4e	16432	ENSMUSG00000030142	-1.55847	8.19592	280.953	4.65582e-63	1.26922e-60
Ccl2	28696	ENSMUSG00000035385	-2.69113	3.49321	276.515	4.31598e-62	1.14856e-59
null	17668	ENSMUSG00000098495	-2.16424	4.15304	275.888	5.91158e-62	1.5366e-59
Icam1	25332	ENSMUSG00000037405	-1.62839	6.95869	272.669	2.97252e-61	7.55088e-59
null	17669	ENSMUSG00000099297	-2.05426	5.4102	272.334	3.51705e-61	8.73558e-59
Sdc4	5229	ENSMUSG00000017009	-1.97096	8.12707	260.67	1.22587e-58	2.9786e-56
Plaur	17638	ENSMUSG00000046223	-1.54719	8.37134	248.004	7.07266e-56	1.68194e-53
Marcksl1	12010	ENSMUSG00000047945	-2.22218	8.66474	243.275	7.59718e-55	1.76903e-52
Il4i1	18223	ENSMUSG00000074141	-3.72666	4.29837	243.164	8.03025e-55	1.83172e-52
Mmp14	24490	ENSMUSG00000000957	-10.0841	1.16024	241.862	1.5441e-54	3.45169e-52
Pou2f2	17670	ENSMUSG00000008496	-2.11217	4.80674	237.204	1.60114e-53	3.50901e-51
Nfkbie	36180	ENSMUSG00000023947	-2.02537	5.09693	231.921	2.27182e-52	4.88311e-50
Socs3	29785	ENSMUSG00000053113	-2.47738	7.15585	229.963	6.07301e-52	1.257e-49
Ltb	35866	ENSMUSG00000024399	-1.95147	4.64252	229.987	6.00126e-52	1.257e-49
Src	5091	ENSMUSG00000027646	-3.82277	2.60685	229.295	8.49541e-52	1.72642e-49
Mtmr7	22194	ENSMUSG00000039431	-3.18216	2.98257	223.255	1.76386e-50	3.52048e-48
Cxcl10	13743	ENSMUSG00000034855	-3.19317	6.48961	219.678	1.06317e-49	2.08475e-47
Zc3h12a	11903	ENSMUSG00000042677	-1.95533	5.75797	217.7	2.87123e-49	5.53306e-47
Ehd1	38063	ENSMUSG00000024772	-1.38376	8.64766	213	3.04358e-48	5.76579e-46
Ier3	35915	ENSMUSG00000003541	-2.32055	6.65958	208.611	2.75955e-47	5.14057e-45
Kdm6b	28237	ENSMUSG00000018476	-1.6989	6.34099	207.314	5.29535e-47	9.70265e-45
Nfkbia	31732	ENSMUSG00000021025	-1.57173	7.53347	200.882	1.34082e-45	2.41716e-43
Dusp5	38802	ENSMUSG00000034765	-2.73906	5.8539	195.016	2.55533e-44	4.53348e-42
Myo1e	26147	ENSMUSG00000032220	-1.24244	7.91501	189.679	3.73563e-43	6.52393e-41
Cpd	28551	ENSMUSG00000020841	-1.14853	8.4476	186.007	2.36514e-42	4.06695e-40
Sh2d5	12295	ENSMUSG00000045349	-1.83288	4.40113	182.691	1.25265e-41	2.12135e-39
Dusp2	4442	ENSMUSG00000027368	-1.78277	4.6824	180.641	3.5116e-41	5.85807e-39
Il1rn	2430	ENSMUSG00000026981	-1.97568	4.823	176.86	2.34956e-40	3.86191e-38
Ccrl2	26791	ENSMUSG00000043953	-5.69506	0.927349	173.545	1.24441e-39	2.01576e-37
Plekho2	26084	ENSMUSG00000050721	-1.13342	7.53838	172.811	1.79972e-39	2.87364e-37
Bcl3	17488	ENSMUSG00000053175	-1.68356	4.91166	171	4.47411e-39	6.98147e-37
Zyx	15345	ENSMUSG00000029860	-1.581	6.03605	170.99	4.49732e-39	6.98147e-37
Arhgef3	23806	ENSMUSG00000021895	-2.20045	3.25932	170.865	4.78856e-39	7.33175e-37
Slc4a7	23665	ENSMUSG00000021733	-1.2891	7.09807	170.214	6.64313e-39	1.00338e-36
Sqstm1	27694	ENSMUSG00000015837	-1.01243	9.47457	166.565	4.16412e-38	6.20565e-36
Lilrb4	20568	ENSMUSG00000062593	-2.48474	7.63908	166.455	4.40131e-38	6.47281e-36
Adora2b	28080	ENSMUSG00000018500	-1.86624	4.08187	161.518	5.27242e-37	7.65323e-35
Actg1	29850	ENSMUSG00000062825	-1.01703	9.99326	158.763	2.10828e-36	2.98281e-34
Srgn	20697	ENSMUSG00000020077	-1.00011	8.18749	158.078	2.97526e-36	4.15682e-34
null	26401	ENSMUSG00000096581	-1.8437	5.09826	156.948	5.25509e-36	7.20754e-34
Nfkb2	38734	ENSMUSG00000025225	-1.58812	6.45495	156.935	5.28781e-36	7.20754e-34
Hcar2	14348	ENSMUSG00000045502	-2.43409	3.41279	155.557	1.05823e-35	1.42504e-33
Relb	17476	ENSMUSG00000002983	-1.64439	4.5805	154.834	1.52238e-35	2.02567e-33
Myc	33094	ENSMUSG00000022346	-2.34622	5.94968	152.64	4.59163e-35	6.03772e-33
Pdcd1	1004	ENSMUSG00000026285	-1.19545	7.03128	151.514	8.09335e-35	1.05185e-32
Ptprj	3813	ENSMUSG00000025314	-1.44024	7.40417	151.454	8.34119e-35	1.0716e-32
Flrt3	4683	ENSMUSG00000051379	-4.26475	1.70301	150.731	1.20026e-34	1.52446e-32
Serpine1	14548	ENSMUSG00000037411	-1.38463	8.44172	147.763	5.34478e-34	6.7122e-32
Hck	4939	ENSMUSG00000003283	-1.20469	7.1897	147.419	6.35664e-34	7.89424e-32
Hdc	4420	ENSMUSG00000027360	-4.24818	2.01974	146.364	1.08105e-33	1.32779e-31
Lpar1	10807	ENSMUSG00000038668	-1.76857	4.20368	143.612	4.31907e-33	5.2472e-31
Axl	17701	ENSMUSG00000002602	-2.16599	3.82879	142.406	7.92857e-33	9.52877e-31
Egr1	37345	ENSMUSG00000038418	-2.26031	3.54398	140.861	1.72574e-32	2.05198e-30
Slc31a2	10896	ENSMUSG00000066152	-1.77185	3.9755	140.669	1.90114e-32	2.23674e-30
Slc11a2	33775	ENSMUSG00000023030	-1.28773	6.00822	139.674	3.13701e-32	3.65233e-30
Spryd7	24673	ENSMUSG00000021930	-1.23672	6.16272	138.467	5.75937e-32	6.63634e-30
Rab11fip1	22102	ENSMUSG00000031488	-1.4057	5.44669	137.995	7.30521e-32	8.33166e-30
Mt2	22843	ENSMUSG00000031762	-1.40784	6.59479	137.96	7.43559e-32	8.39471e-30
Tmem2	38391	ENSMUSG00000024754	-1.63912	4.64163	137.929	7.55115e-32	8.43992e-30
Tlr2	8886	ENSMUSG00000027995	-0.930396	8.33043	136.718	1.38976e-31	1.53795e-29
Edn1	30530	ENSMUSG00000021367	-4.71875	0.754513	135.461	2.6175e-31	2.86821e-29
Cd14	37385	ENSMUSG00000051439	-1.12099	9.87697	135.42	2.67221e-31	2.89974e-29
Tpbg	26362	ENSMUSG00000035274	-4.26775	0.978184	134.084	5.23737e-31	5.62866e-29
Ifnb1	11130	ENSMUSG00000048806	-5.89017	0.212901	132.356	1.25025e-30	1.33087e-28
Gp49a	20567	ENSMUSG00000089672	-2.9849	6.80287	131.882	1.58821e-30	1.67466e-28
Odc1	31486	ENSMUSG00000011179	-1.4084	10.3431	131.241	2.19301e-30	2.26956e-28
Znrf1	23121	ENSMUSG00000033545	-1.32795	4.6923	130.678	2.91227e-30	2.98628e-28
St3gal1	33138	ENSMUSG00000013846	-1.28866	5.27135	125.964	3.1309e-29	3.18128e-27
Gm17709	23261	ENSMUSG00000091952	-1.50087	4.17521	122.231	2.05459e-28	2.06884e-26
Rhoc	9470	ENSMUSG00000002233	-1.11614	7.50028	121.212	3.43485e-28	3.4278e-26
Rasgef1b	13822	ENSMUSG00000029333	-2.04475	4.02864	121.071	3.68619e-28	3.64607e-26
Gpr132	32513	ENSMUSG00000021298	-2.88714	1.81341	120.177	5.7869e-28	5.6737e-26
Clec2d	16595	ENSMUSG00000030157	-4.00701	1.05974	119.863	6.77839e-28	6.588e-26
Fgr	12120	ENSMUSG00000028874	-1.63071	6.61592	116.643	3.43718e-27	3.31184e-25
Rassf4	16318	ENSMUSG00000042129	-1.12036	7.0852	116.516	3.66341e-27	3.49966e-25
Bcl6b	28304	ENSMUSG00000000317	-3.4853	1.21207	116.497	3.69909e-27	3.50379e-25
P2rx5	28415	ENSMUSG00000005950	-3.13163	2.33641	116.329	4.02587e-27	3.78128e-25
Smox	4578	ENSMUSG00000027333	-1.01653	7.05041	115.513	6.07459e-27	5.65798e-25
Gsap	12998	ENSMUSG00000039934	-1.18401	6.21281	113.883	1.38229e-26	1.27685e-24
Plet1	25820	ENSMUSG00000032068	-3.20379	2.198	113.539	1.64398e-26	1.49388e-24
Phldb1	25738	ENSMUSG00000048537	-1.07263	6.63196	113.095	2.05645e-26	1.85363e-24
Plek2	31940	ENSMUSG00000021118	-3.26145	1.48999	112.099	3.39938e-26	3.03959e-24
Cd274	38469	ENSMUSG00000016496	-2.30095	2.80926	109.492	1.26611e-25	1.12312e-23
Cdc42ep2	38033	ENSMUSG00000045664	-3.15652	2.48141	109.401	1.32592e-25	1.16692e-23
Srxn1	4889	ENSMUSG00000032802	-0.990019	7.92099	109.153	1.50255e-25	1.31203e-23
Lcp2	27484	ENSMUSG00000002699	-1.0419	7.39923	106.557	5.56578e-25	4.82238e-23
Agpat4	35110	ENSMUSG00000023827	-1.45114	5.28762	104.826	1.33315e-24	1.1462e-22
Rhbdf2	29735	ENSMUSG00000020806	-1.15898	6.93336	104.655	1.45357e-24	1.24019e-22
Junb	22719	ENSMUSG00000052837	-0.986708	8.50077	103.605	2.46919e-24	2.09077e-22
Glrx	30986	ENSMUSG00000021591	-1.24626	7.43456	103.556	2.53123e-24	2.12719e-22
Gm7278	1438	ENSMUSG00000080950	-1.49888	4.12628	103.007	3.33917e-24	2.78522e-22
Atf3	1972	ENSMUSG00000026628	-1.40029	4.36316	101.12	8.65579e-24	7.16636e-22
Xcr1	26977	ENSMUSG00000060509	-2.72921	1.38967	99.7552	1.72445e-23	1.40688e-21
Il10ra	25760	ENSMUSG00000032089	-1.63044	4.50519	99.766	1.71508e-23	1.40688e-21
Ptgs2	1412	ENSMUSG00000032487	-1.68766	8.6198	99.0931	2.40909e-23	1.95119e-21
Hivep3	11769	ENSMUSG00000028634	-1.80596	4.62023	98.5275	3.20535e-23	2.57742e-21
Vmp1	28822	ENSMUSG00000018171	-1.03429	6.83496	97.0204	6.86179e-23	5.4393e-21
Lrrc16a	30298	ENSMUSG00000021338	-1.66304	3.06864	96.5856	8.54663e-23	6.72716e-21
Bcl2l11	4464	ENSMUSG00000027381	-1.3574	5.13791	95.1292	1.78353e-22	1.39402e-20
2500002B13Rik	22321	ENSMUSG00000096917	-2.04845	2.51098	94.5089	2.43988e-22	1.89378e-20
Psd	38735	ENSMUSG00000037126	-1.63414	3.25874	93.5015	4.05892e-22	3.12872e-20
Scin	31646	ENSMUSG00000002565	-2.12653	2.37102	92.8763	5.56671e-22	4.26158e-20
Ksr2	14208	ENSMUSG00000061578	-2.84438	1.74008	92.6074	6.37677e-22	4.84852e-20
Csrnp1	26895	ENSMUSG00000032515	-1.39629	4.47948	90.4785	1.87001e-21	1.41224e-19
Nr1d1	29156	ENSMUSG00000020889	-1.18022	4.63046	89.5351	3.01248e-21	2.25976e-19
Ripk2	10161	ENSMUSG00000041135	-1.13639	5.75216	88.8481	4.26328e-21	3.17671e-19
Pde1b	33902	ENSMUSG00000022489	-1.0682	6.60672	88.6909	4.61591e-21	3.41669e-19
Pik3r5	28191	ENSMUSG00000020901	-0.850946	7.92065	88.314	5.5848e-21	4.10666e-19
Stx11	20225	ENSMUSG00000039232	-2.09251	1.93389	88.2101	5.8858e-21	4.29971e-19
2010300C02Rik	290	ENSMUSG00000026090	-3.49321	0.596777	88.1169	6.16984e-21	4.47794e-19
Slc15a3	38214	ENSMUSG00000024737	-1.59402	4.76817	87.3934	8.89489e-21	6.41407e-19
Dcbld2	34690	ENSMUSG00000035107	-1.24245	4.64054	87.0992	1.03212e-20	7.39485e-19
Lrrc25	22467	ENSMUSG00000049988	-1.25241	4.31763	86.9828	1.09467e-20	7.79305e-19
Bcl2a1b	26414	ENSMUSG00000089929	-1.63754	3.94004	86.7826	1.21133e-20	8.56899e-19
Sema4b	18807	ENSMUSG00000030539	-1.32226	5.6656	85.6411	2.15745e-20	1.50711e-18
Dst	237	ENSMUSG00000026131	-0.978055	7.21048	85.5907	2.2131e-20	1.53638e-18
Tmem171	31165	ENSMUSG00000052485	-1.69091	3.69172	85.4384	2.39033e-20	1.64918e-18
Serpinb6b	30427	ENSMUSG00000042842	-2.11791	2.91287	85.1031	2.83203e-20	1.9301e-18
Saa3	18334	ENSMUSG00000040026	-3.89428	1.02354	85.0406	2.92294e-20	1.97998e-18
Rnf19b	11988	ENSMUSG00000028793	-1.1015	6.5132	84.5783	3.6929e-20	2.48648e-18
Abtb2	3985	ENSMUSG00000032724	-2.41785	1.4874	84.2197	4.42739e-20	2.94553e-18
Myo10	32845	ENSMUSG00000022272	-0.865134	7.4247	83.2229	7.33018e-20	4.81938e-18
Slc26a9	1215	ENSMUSG00000042268	-2.90745	0.854506	82.8378	8.90687e-20	5.82176e-18
Ptafr	12107	ENSMUSG00000056529	-2.07216	2.0199	81.2235	2.01579e-19	1.30234e-17
Traf5	1988	ENSMUSG00000026637	-1.5323	2.97104	80.3485	3.13871e-19	2.01617e-17
Slc6a4	28555	ENSMUSG00000020838	-2.30888	1.87901	80.3148	3.19266e-19	2.03911e-17
Cd82	3896	ENSMUSG00000027215	-1.00413	5.84674	80.2128	3.36182e-19	2.13495e-17
Xirp1	26896	ENSMUSG00000079243	-1.96243	5.51557	80.0775	3.60014e-19	2.27338e-17
Cdyl2	23160	ENSMUSG00000031758	-1.12171	4.10882	80.044	3.66162e-19	2.29921e-17
Gfod1	30538	ENSMUSG00000051335	-1.41991	6.1043	79.9717	3.79816e-19	2.37162e-17
Lasp1	29105	ENSMUSG00000038366	-0.827755	8.43609	79.9317	3.87578e-19	2.40664e-17
Peli1	27271	ENSMUSG00000020134	-1.4641	5.42394	79.372	5.14499e-19	3.15964e-17
C3	36394	ENSMUSG00000024164	-1.73183	3.22586	79.2749	5.40429e-19	3.30075e-17
Nfkbib	17806	ENSMUSG00000030595	-1.00572	5.82912	78.7711	6.97401e-19	4.23633e-17
Rbfox1	33975	ENSMUSG00000008658	-1.00216	6.03337	78.688	7.27365e-19	4.39446e-17
Itgax	19821	ENSMUSG00000030789	-2.26875	1.69286	78.2091	9.26905e-19	5.54011e-17
Cxcl11	13744	ENSMUSG00000060183	-2.6014	2.07307	78.1741	9.43498e-19	5.6093e-17
Cybb	5866	ENSMUSG00000015340	-0.690628	8.56025	77.7392	1.17583e-18	6.95355e-17
Abr	28544	ENSMUSG00000017631	-0.755004	8.04681	77.712	1.19216e-18	7.01301e-17
Gm20645	27332	ENSMUSG00000093470	-1.05016	5.38343	77.1955	1.54848e-18	9.06147e-17
Slc2a1	11739	ENSMUSG00000028645	-0.854859	8.00745	76.9936	1.71513e-18	9.98436e-17
Ninj1	30599	ENSMUSG00000037966	-0.787716	7.35348	76.6505	2.04056e-18	1.18173e-16
Aim1l	12163	ENSMUSG00000012123	-1.64585	2.69149	76.6307	2.06109e-18	1.18746e-16
Arc	33179	ENSMUSG00000022602	-1.41232	3.14626	76.4623	2.2446e-18	1.28656e-16
Swap70	19514	ENSMUSG00000031015	-0.717837	7.68915	74.9641	4.79351e-18	2.70591e-16
Vgf	14546	ENSMUSG00000037428	-1.38302	3.6153	74.2469	6.8933e-18	3.87168e-16
Ell2	30984	ENSMUSG00000001542	-0.791351	7.4197	74.0404	7.65356e-18	4.27719e-16
Mx2	35013	ENSMUSG00000023341	-4.32845	5.13283	73.9221	8.12609e-18	4.51867e-16
Slc11a1	682	ENSMUSG00000026177	-0.853232	7.16827	73.5486	9.81881e-18	5.43291e-16
Nod2	22793	ENSMUSG00000055994	-2.42077	2.60415	73.3067	1.10992e-17	6.11109e-16
Grap	28068	ENSMUSG00000004837	-1.28386	5.42629	72.4927	1.6765e-17	9.05228e-16
Dot1l	21005	ENSMUSG00000061589	-0.664894	8.24512	71.7793	2.40665e-17	1.29323e-15
Ets2	34988	ENSMUSG00000022895	-1.10941	7.28688	71.769	2.41925e-17	1.29378e-15
Bcl2l1	4928	ENSMUSG00000007659	-1.48391	6.40927	71.748	2.44506e-17	1.30135e-15
Xylt2	28959	ENSMUSG00000020868	-0.944325	5.44327	71.7363	2.45972e-17	1.30295e-15
Igsf3	9412	ENSMUSG00000042035	-1.6721	4.25692	71.5416	2.71477e-17	1.43127e-15
Ptprn	722	ENSMUSG00000026204	-2.48592	2.36154	71.2663	3.12121e-17	1.63783e-15
Pxn	14169	ENSMUSG00000029528	-0.747227	8.59602	70.8535	3.84769e-17	2.00961e-15
Dpep3	23006	ENSMUSG00000031898	-2.92465	0.969435	70.5303	4.53241e-17	2.35622e-15
Birc3	25177	ENSMUSG00000032000	-0.928785	5.3528	70.4191	4.79537e-17	2.48138e-15
Plagl2	4943	ENSMUSG00000051413	-0.930527	5.91772	69.9217	6.17067e-17	3.17832e-15
Tgfb1	17698	ENSMUSG00000002603	-0.883494	8.27132	69.0952	9.38229e-17	4.81036e-15
Arhgap23	29082	ENSMUSG00000049807	-1.08624	4.53068	68.6386	1.18266e-16	6.00844e-15
Rgs16	1453	ENSMUSG00000026475	-1.9201	8.31162	68.5659	1.22706e-16	6.20581e-15
Fndc7	9575	ENSMUSG00000045326	-2.09494	2.05532	67.7802	1.82779e-16	9.1611e-15
Errfi1	12696	ENSMUSG00000028967	-1.54348	4.69508	66.9998	2.71541e-16	1.35321e-14
Nfkbid	17884	ENSMUSG00000036931	-0.865455	6.46973	66.9935	2.7241e-16	1.35321e-14
Spi1	3832	ENSMUSG00000002111	-0.632049	9.1013	66.8761	2.89121e-16	1.42987e-14
Mmp9	5271	ENSMUSG00000017737	-3.14198	0.848505	65.8881	4.77265e-16	2.32943e-14
Stx6	1469	ENSMUSG00000026470	-0.92957	5.62044	65.8435	4.88176e-16	2.37232e-14
Btg1	21267	ENSMUSG00000036478	-1.04671	7.98771	65.6402	5.41231e-16	2.61876e-14
Tsc22d1	24896	ENSMUSG00000022010	-1.10716	6.36006	65.0532	7.29032e-16	3.51224e-14
Nes	8947	ENSMUSG00000004891	-1.795	3.32704	64.41	1.01045e-15	4.82643e-14
Jak2	38465	ENSMUSG00000024789	-0.861759	5.74038	64.2452	1.09857e-15	5.22498e-14
Nadk	12790	ENSMUSG00000029063	-0.632263	8.28599	63.6074	1.51857e-15	7.13153e-14
Evi2a	28652	ENSMUSG00000078771	-0.814882	6.55137	63.3746	1.70909e-15	7.95936e-14
Mcl1	9253	ENSMUSG00000038612	-0.6207	9.05389	63.143	1.92235e-15	8.9154e-14
Isg15	12840	ENSMUSG00000035692	-3.96947	5.08967	62.8897	2.18608e-15	1.00966e-13
Abhd5	26941	ENSMUSG00000032540	-0.932889	5.82649	62.5679	2.57415e-15	1.16956e-13
Cd44	3971	ENSMUSG00000005087	-0.650839	9.55082	62.5735	2.56679e-15	1.16956e-13
Icosl	20878	ENSMUSG00000000732	-1.5039	2.89662	62.4213	2.77307e-15	1.24978e-13
Slfn5	28719	ENSMUSG00000054404	-1.99534	4.97385	62.1115	3.24557e-15	1.45686e-13
3110043O21Rik	10363	ENSMUSG00000028300	-1.09318	5.33019	62.0384	3.3682e-15	1.50585e-13
Mylk2	4931	ENSMUSG00000027470	-2.1805	1.85711	61.5178	4.38759e-15	1.93834e-13
Oasl1	14135	ENSMUSG00000041827	-3.35312	8.4827	61.2321	5.07279e-15	2.22347e-13
Malt1	37695	ENSMUSG00000032688	-1.06892	6.44508	59.148	1.46246e-14	6.19165e-13
Plek	27216	ENSMUSG00000020120	-0.737182	8.23429	59.1003	1.49836e-14	6.31967e-13
Slc3a2	38134	ENSMUSG00000010095	-0.603558	8.36425	58.1781	2.3943e-14	1.00606e-12
Pcdh7	13422	ENSMUSG00000029108	-0.713205	8.61765	57.921	2.72853e-14	1.13794e-12
Fbxo15	37871	ENSMUSG00000034391	-1.07475	3.96228	57.7184	3.02463e-14	1.25674e-12
Tnfrsf9	12698	ENSMUSG00000028965	-2.55405	0.46609	57.3691	3.61238e-14	1.49539e-12
Usp18	16386	ENSMUSG00000030107	-2.96232	6.21776	57.1816	3.97365e-14	1.63285e-12
Oas1b	14255	ENSMUSG00000029605	-2.40342	3.96999	57.1511	4.03585e-14	1.65233e-12
Igf2r	35120	ENSMUSG00000023830	-0.705547	7.13493	56.5974	5.34816e-14	2.17369e-12
Rilpl2	14369	ENSMUSG00000029401	-0.919278	5.02744	56.5195	5.5643e-14	2.25334e-12
Rap1b	21432	ENSMUSG00000052681	-0.725214	8.37572	56.052	7.05784e-14	2.81734e-12
Itgb2	20847	ENSMUSG00000000290	-0.586851	8.32848	55.3153	1.02668e-13	4.06921e-12
Vps37a	22193	ENSMUSG00000031600	-0.877157	5.00961	55.0615	1.1682e-13	4.59752e-12
Casp4	25154	ENSMUSG00000033538	-1.33998	3.30565	54.8425	1.30584e-13	5.10328e-12
Cd52	12164	ENSMUSG00000000682	-0.748739	6.76107	54.0988	1.90658e-13	7.37365e-12
Irak2	16263	ENSMUSG00000060477	-1.27923	6.20449	53.9599	2.04621e-13	7.83235e-12
Herpud1	22850	ENSMUSG00000031770	-1.00338	5.87249	53.933	2.07447e-13	7.91343e-12
Gm12715	11388	ENSMUSG00000059195	-0.962033	4.77987	53.5754	2.48859e-13	9.4288e-12
Vasp	17450	ENSMUSG00000030403	-0.588918	8.85649	53.4709	2.62453e-13	9.91025e-12
Zbtb32	17901	ENSMUSG00000006310	-0.762097	7.79384	53.2731	2.90256e-13	1.09232e-11
Ptges	2694	ENSMUSG00000050737	-1.62843	2.60074	53.1005	3.1691e-13	1.1807e-11
Mapkapk2	1201	ENSMUSG00000016528	-0.735596	8.76415	52.9676	3.39096e-13	1.25499e-11
Tmem229b	31941	ENSMUSG00000046157	-0.824972	6.52818	52.9144	3.48415e-13	1.28522e-11
Osgin2	10158	ENSMUSG00000041153	-0.825965	4.9624	52.5136	4.2728e-13	1.56581e-11
Atxn1	30562	ENSMUSG00000046876	-0.894579	5.38885	52.4122	4.49928e-13	1.64341e-11
Ifih1	3148	ENSMUSG00000026896	-2.81472	5.83085	52.3744	4.58663e-13	1.66986e-11
Notch1	2550	ENSMUSG00000026923	-1.20665	3.05114	52.3594	4.62183e-13	1.67721e-11
Vegfa	36193	ENSMUSG00000023951	-1.1915	4.63567	52.2003	5.01175e-13	1.81283e-11
Mybpc3	3833	ENSMUSG00000002100	-1.55843	1.89365	52.0444	5.426e-13	1.95634e-11
Cflar	485	ENSMUSG00000026031	-0.863216	6.19025	51.6591	6.60236e-13	2.37282e-11
Slc2a6	2578	ENSMUSG00000036067	-0.860263	4.96536	51.4982	7.16634e-13	2.56725e-11
Sod2	35137	ENSMUSG00000006818	-0.667101	7.10241	51.2044	8.32334e-13	2.9722e-11
Zfp36	17788	ENSMUSG00000044786	-1.09995	6.62552	51.0495	9.00678e-13	3.20601e-11
Mndal	1784	ENSMUSG00000090272	-1.51809	6.28139	50.9374	9.53582e-13	3.38355e-11
Murc	10668	ENSMUSG00000028348	-1.65572	1.85181	50.4406	1.22828e-12	4.33077e-11
Ptpre	19907	ENSMUSG00000041836	-1.31331	5.50889	50.3434	1.29065e-12	4.53635e-11
Atp2b1	21277	ENSMUSG00000019943	-0.62668	7.83749	49.9059	1.61297e-12	5.6338e-11
Zfp811	35683	ENSMUSG00000055202	-2.98025	-0.319855	49.714	1.77876e-12	6.19352e-11
2009-09-01	29762	ENSMUSG00000059248	-0.559658	7.99102	49.4325	2.05314e-12	7.12668e-11
9130230L23Rik	13475	ENSMUSG00000054598	-1.89653	1.966	48.9395	2.63979e-12	9.10647e-11
Rgl1	1436	ENSMUSG00000026482	-0.617426	7.57585	48.6674	3.03266e-12	1.03976e-10
Siglec1	4560	ENSMUSG00000027322	-1.11543	4.00336	48.6442	3.06876e-12	1.04892e-10
Cntnap5c	36403	ENSMUSG00000038048	-2.00923	0.738855	48.5763	3.17688e-12	1.08256e-10
Mrpl52	24489	ENSMUSG00000010406	-0.806246	6.07881	48.5503	3.21928e-12	1.09367e-10
Nckap1l	33901	ENSMUSG00000022488	-0.587843	8.43153	48.2281	3.79412e-12	1.28117e-10
Flnb	23615	ENSMUSG00000025278	-0.629927	8.00031	48.0623	4.1288e-12	1.38581e-10
Dpep2	23007	ENSMUSG00000053687	-1.05795	5.28815	47.9319	4.41291e-12	1.47674e-10
1110002J07Rik	20733	ENSMUSG00000097134	-1.19226	2.78028	47.5244	5.43243e-12	1.80709e-10
Ralgds	2611	ENSMUSG00000026821	-0.864025	4.87361	46.962	7.23765e-12	2.38629e-10
Gm8995	19399	ENSMUSG00000063286	-1.64953	5.64686	46.5818	8.78721e-12	2.88019e-10
Irgm2	27899	ENSMUSG00000069874	-2.58622	5.26047	46.2638	1.03356e-11	3.36795e-10
Glipr1	21374	ENSMUSG00000056888	-0.619262	7.2136	46.1801	1.07866e-11	3.50471e-10
Wisp1	33134	ENSMUSG00000005124	-1.70168	2.16603	46.1591	1.0903e-11	3.53225e-10
Cxcl16	28320	ENSMUSG00000018920	-0.681278	7.21323	45.9104	1.23789e-11	3.98729e-10
Scimp	28348	ENSMUSG00000057135	-1.68583	1.33586	45.8584	1.27115e-11	4.08267e-10
Cd47	34634	ENSMUSG00000055447	-0.730669	5.90789	45.7472	1.34538e-11	4.30869e-10
BC049352	25759	ENSMUSG00000091996	-2.25588	0.275633	45.4595	1.55828e-11	4.97625e-10
Slfn4	28729	ENSMUSG00000000204	-1.30766	7.23892	45.1012	1.87109e-11	5.89102e-10
Olr1	16606	ENSMUSG00000030162	-1.4237	4.35004	45.0412	1.92937e-11	6.04049e-10
Blcap	5095	ENSMUSG00000067787	-0.751298	5.47709	44.9768	1.99383e-11	6.20752e-10
Iffo2	12337	ENSMUSG00000041025	-0.819998	4.71071	44.9327	2.0392e-11	6.31362e-10
Nupr1	19720	ENSMUSG00000030717	-0.79423	4.52758	44.7633	2.22354e-11	6.84642e-10
Stim2	13412	ENSMUSG00000039156	-0.755368	5.94023	44.4232	2.64537e-11	8.07849e-10
Sertad1	17751	ENSMUSG00000008384	-0.965761	4.74494	44.2461	2.8958e-11	8.72407e-10
Il2rg	7198	ENSMUSG00000031304	-0.934939	4.75697	44.2504	2.88942e-11	8.72407e-10
Por	14504	ENSMUSG00000005514	-0.605879	7.90321	44.2318	2.91702e-11	8.7644e-10
Calcrl	3462	ENSMUSG00000059588	-0.843025	6.11938	44.1679	3.01376e-11	9.03079e-10
Tasp1	4671	ENSMUSG00000039033	-0.763352	4.66718	44.05	3.20096e-11	9.55096e-10
Stk10	27456	ENSMUSG00000020272	-0.693981	6.71144	43.4292	4.39585e-11	1.2998e-09
Rapgef2	8843	ENSMUSG00000062232	-0.78919	5.47629	43.3938	4.47613e-11	1.32005e-09
Lphn2	9904	ENSMUSG00000028184	-1.57752	2.73813	43.3405	4.59971e-11	1.35292e-09
Perm1	12842	ENSMUSG00000078486	-1.53743	2.57994	43.2441	4.83188e-11	1.41748e-09
Ticam1	36354	ENSMUSG00000047123	-0.755036	4.63553	43.1467	5.07864e-11	1.48597e-09
Txnrd1	21095	ENSMUSG00000020250	-0.494301	9.48877	43.0507	5.33396e-11	1.5566e-09
Icam5	25335	ENSMUSG00000032174	-1.49966	2.29577	42.6334	6.60229e-11	1.91609e-09
Metrnl	29931	ENSMUSG00000039208	-1.10311	3.71665	42.5869	6.76113e-11	1.94766e-09
Dcstamp	32964	ENSMUSG00000022303	-1.08026	4.91724	42.5453	6.90639e-11	1.97957e-09
Gripap1	5785	ENSMUSG00000031153	-0.557673	7.71213	42.545	6.90731e-11	1.97957e-09
Btg2	1267	ENSMUSG00000020423	-1.01344	3.24824	42.4997	7.06927e-11	2.0208e-09
Oas2	14251	ENSMUSG00000032690	-1.70778	6.83526	42.489	7.10809e-11	2.02156e-09
H2-T23	35940	ENSMUSG00000067212	-0.805797	5.27804	42.4637	7.20071e-11	2.0427e-09
Irf7	20010	ENSMUSG00000025498	-1.85555	6.63821	42.1341	8.52227e-11	2.39933e-09
Cln5	25003	ENSMUSG00000022125	-0.77366	6.28791	42.1051	8.64969e-11	2.42909e-09
Irf9	24549	ENSMUSG00000002325	-1.19219	6.11133	42.0827	8.74959e-11	2.45098e-09
Gch1	24155	ENSMUSG00000037580	-0.783993	4.81534	41.6201	1.10846e-10	3.07425e-09
Pip5k1a	9219	ENSMUSG00000028126	-0.661798	6.41166	41.6147	1.11156e-10	3.07521e-09
Ahnak2	32510	ENSMUSG00000072812	-2.41279	4.14461	41.5573	1.14467e-10	3.159e-09
Irgm1	27640	ENSMUSG00000046879	-2.20703	6.78491	41.4135	1.23206e-10	3.38347e-09
Mfsd12	21051	ENSMUSG00000034854	-0.705335	6.92856	41.3059	1.30176e-10	3.54874e-09
Myof	38571	ENSMUSG00000048612	-0.515951	7.86225	41.3088	1.29983e-10	3.54874e-09
Igf2bp2	34263	ENSMUSG00000033581	-1.15239	3.45219	41.0421	1.48981e-10	4.04167e-09
Mir22hg	28512	ENSMUSG00000085148	-0.728214	4.64297	40.8959	1.60557e-10	4.34514e-09
Igtp	27898	ENSMUSG00000078853	-2.4166	4.66847	40.6699	1.80239e-10	4.8543e-09
Parp14	34446	ENSMUSG00000034422	-2.18449	6.6805	40.4915	1.9747e-10	5.28019e-09
Gramd1b	25660	ENSMUSG00000040111	-0.690819	5.98596	40.4581	2.00878e-10	5.3585e-09
Ifit1	38533	ENSMUSG00000034459	-4.61228	5.83978	40.417	2.05144e-10	5.45926e-09
Ass1	2707	ENSMUSG00000076441	-1.89697	3.42587	40.2826	2.19762e-10	5.80682e-09
Cyp2s1	17702	ENSMUSG00000040703	-1.12043	3.73851	40.0704	2.44973e-10	6.42738e-09
Slc39a1	9067	ENSMUSG00000052310	-0.56913	7.25453	39.8317	2.76822e-10	7.22906e-09
Xaf1	28387	ENSMUSG00000040483	-2.35635	4.83473	39.5679	3.16846e-10	8.23579e-09
Zbp1	5440	ENSMUSG00000027514	-2.45481	3.73967	39.2021	3.82131e-10	9.88675e-09
Zfp827	22604	ENSMUSG00000071064	-0.974916	4.44067	38.8076	4.67713e-10	1.20175e-08
H2-Q7	35891	ENSMUSG00000060550	-0.812472	3.89338	38.7555	4.80347e-10	1.23139e-08
Ptprs	36359	ENSMUSG00000013236	-0.567126	7.6891	38.7354	4.85333e-10	1.24044e-08
Kcnd1	5787	ENSMUSG00000009731	-2.01481	0.727343	38.635	5.10944e-10	1.30087e-08
Mnda	1785	ENSMUSG00000026536	-2.46673	2.16881	38.2029	6.37577e-10	1.605e-08
Prkcd	23827	ENSMUSG00000021948	-0.582807	7.46832	37.9474	7.26787e-10	1.82137e-08
Stap1	13635	ENSMUSG00000029254	-1.06915	6.13463	37.7305	8.12232e-10	2.0174e-08
Fam214b	10522	ENSMUSG00000036002	-0.766041	4.73575	37.6742	8.36017e-10	2.06273e-08
Sla	33133	ENSMUSG00000022372	-0.723472	4.85027	37.4577	9.34189e-10	2.29987e-08
Coq10b	441	ENSMUSG00000025981	-0.769015	4.32313	37.4297	9.47658e-10	2.32791e-08
Batf2	38053	ENSMUSG00000039699	-2.34314	1.32465	37.3622	9.8106e-10	2.3943e-08
Lamc2	1444	ENSMUSG00000026479	-1.04013	3.29647	37.3677	9.783e-10	2.3943e-08
Litaf	34020	ENSMUSG00000022500	-0.857349	6.05017	37.3621	9.81111e-10	2.3943e-08
Gadd45a	15673	ENSMUSG00000036390	-2.42309	-0.257423	37.2711	1.02798e-09	2.50321e-08
Col27a1	10920	ENSMUSG00000045672	-1.7939	1.36061	37.2261	1.05196e-09	2.55602e-08
Slc25a19	29683	ENSMUSG00000020744	-0.707504	4.7218	37.1863	1.07365e-09	2.60308e-08
AI607873	1781	ENSMUSG00000073490	-2.19123	6.4835	37.167	1.08431e-09	2.62323e-08
Ifi44l	9914	ENSMUSG00000039146	-1.8477	3.71339	36.871	1.26211e-09	3.04678e-08
Itpkb	1859	ENSMUSG00000038855	-0.726506	4.99378	36.7332	1.35452e-09	3.26281e-08
Helz2	5639	ENSMUSG00000027580	-1.90137	6.59415	36.7032	1.37554e-09	3.30632e-08
Tor3a	1489	ENSMUSG00000060519	-1.68728	7.20731	36.6623	1.40473e-09	3.36925e-08
Cdkn1a	35601	ENSMUSG00000023067	-0.632908	8.48741	36.5956	1.45361e-09	3.47903e-08
Shisa3	13497	ENSMUSG00000050010	-1.76521	1.6327	36.4142	1.59538e-09	3.79796e-08
Tm9sf4	4941	ENSMUSG00000068040	-0.563264	6.85375	36.3275	1.66793e-09	3.95806e-08
Aldh4a1	12340	ENSMUSG00000028737	-1.08019	3.87161	36.0669	1.90653e-09	4.50514e-08
Ap1s3	759	ENSMUSG00000054702	-0.649745	6.0042	35.9739	1.99983e-09	4.70571e-08
Eif6	5025	ENSMUSG00000027613	-0.575056	7.38299	35.7685	2.22208e-09	5.18502e-08
Slfn8	28723	ENSMUSG00000035208	-1.55344	5.49274	35.5614	2.47135e-09	5.74268e-08
Osm	27048	ENSMUSG00000058755	-1.24194	2.44166	35.5394	2.49946e-09	5.79594e-08
Rbpms2	26086	ENSMUSG00000032387	-1.54778	2.26217	35.493	2.55971e-09	5.92336e-08
Polm	27092	ENSMUSG00000020474	-0.850384	3.82865	35.4783	2.5791e-09	5.9559e-08
Agrn	12839	ENSMUSG00000041936	-0.945744	4.62748	35.4356	2.63628e-09	6.0754e-08
Ifit3	38529	ENSMUSG00000074896	-3.40017	4.79125	35.3961	2.69026e-09	6.18704e-08
Apol9a	33296	ENSMUSG00000057346	-2.59214	2.78605	35.3708	2.72536e-09	6.25489e-08
Dus2	23009	ENSMUSG00000031901	-0.696878	5.28952	35.2697	2.87061e-09	6.57476e-08
Cotl1	23201	ENSMUSG00000031827	-0.61452	7.07436	34.9142	3.44556e-09	7.7844e-08
Ddx28	23010	ENSMUSG00000045538	-0.684995	5.37563	34.5174	4.22467e-09	9.46276e-08
Hcls1	34495	ENSMUSG00000022831	-0.543971	8.64561	34.3763	4.54232e-09	1.01336e-07
Abcc1	34076	ENSMUSG00000023088	-0.46799	8.64321	33.9721	5.59082e-09	1.24479e-07
Ifi44	9913	ENSMUSG00000028037	-1.48221	7.09609	33.9455	5.66782e-09	1.25943e-07
Isg20	18776	ENSMUSG00000039236	-2.14818	3.21095	33.7103	6.39608e-09	1.41562e-07
Tubb6	37718	ENSMUSG00000001473	-0.499546	8.6013	33.3072	7.86908e-09	1.72795e-07
Rtp4	34303	ENSMUSG00000033355	-2.43044	6.25144	33.2684	8.02768e-09	1.75932e-07
Samd9l	14867	ENSMUSG00000047735	-1.72658	5.6028	33.0643	8.91596e-09	1.94636e-07
Fhod3	37259	ENSMUSG00000034295	-1.4967	1.74455	33.0563	8.95271e-09	1.95057e-07
Jade2	27752	ENSMUSG00000020387	-0.720868	4.83185	32.9881	9.27252e-09	2.01632e-07
Rel	27333	ENSMUSG00000020275	-0.784186	3.93098	32.9438	9.48624e-09	2.05166e-07
Car2	8369	ENSMUSG00000027562	-0.528722	8.51134	32.943	9.49008e-09	2.05166e-07
C5ar1	17365	ENSMUSG00000049130	-0.624715	7.65861	32.8161	1.01302e-08	2.17741e-07
Tnfrsf1b	12503	ENSMUSG00000028599	-1.47109	3.67915	32.7327	1.05745e-08	2.25988e-07
Klf7	576	ENSMUSG00000025959	-0.94268	3.35316	32.6928	1.07939e-08	2.29797e-07
Oasl2	14133	ENSMUSG00000029561	-2.64445	4.3031	32.6316	1.11388e-08	2.3669e-07
Ece1	12288	ENSMUSG00000057530	-1.9967	0.590329	32.5261	1.17601e-08	2.48473e-07
Zc3h12c	25856	ENSMUSG00000035164	-1.14058	5.39266	32.5121	1.18452e-08	2.498e-07
Ifitm3	19993	ENSMUSG00000025492	-0.61798	8.10568	32.4969	1.19381e-08	2.51284e-07
Oas1g	14259	ENSMUSG00000066861	-1.17484	5.71207	32.3037	1.31859e-08	2.75991e-07
Pip5k1b	38417	ENSMUSG00000024867	-0.652137	6.31947	32.283	1.33273e-08	2.78428e-07
Anxa7	23713	ENSMUSG00000021814	-0.603669	7.21351	32.183	1.40316e-08	2.9205e-07
Maff	33367	ENSMUSG00000042622	-1.26154	1.93468	31.9676	1.56763e-08	3.25677e-07
Itgav	3446	ENSMUSG00000027087	-0.516122	8.64359	31.9599	1.57391e-08	3.26374e-07
Fam171b	3449	ENSMUSG00000048388	-1.79107	0.496893	31.8408	1.67342e-08	3.46367e-07
Tmem132a	38215	ENSMUSG00000024736	-1.3515	2.25084	31.8249	1.6872e-08	3.48573e-07
Frmd6	31855	ENSMUSG00000048285	-1.49192	1.99653	31.7575	1.7467e-08	3.60201e-07
Kctd11	28279	ENSMUSG00000046731	-0.950098	3.21899	31.6744	1.82306e-08	3.75255e-07
Smim3	37621	ENSMUSG00000038059	-0.72539	4.74429	31.5511	1.94263e-08	3.96944e-07
Sap30	22320	ENSMUSG00000031609	-0.778354	6.51034	31.354	2.1502e-08	4.37755e-07
Rnf114	5337	ENSMUSG00000006418	-0.88683	6.39549	31.3114	2.19787e-08	4.46646e-07
Sema4d	30640	ENSMUSG00000021451	-0.719973	6.50276	31.2907	2.22137e-08	4.50604e-07
Dlgap4	5062	ENSMUSG00000061689	-0.60586	5.92454	31.0363	2.53242e-08	5.10919e-07
Pip5k1c	21045	ENSMUSG00000034902	-0.462861	8.81527	31.0384	2.52976e-08	5.10919e-07
Ube2f	937	ENSMUSG00000034343	-0.550758	6.66651	30.9111	2.70125e-08	5.42044e-07
Pqlc1	37832	ENSMUSG00000034006	-0.638968	4.99172	30.6972	3.01594e-08	6.03027e-07
Socs1	34010	ENSMUSG00000038037	-2.85411	1.90102	30.6068	3.15989e-08	6.29557e-07
Dhx58	29284	ENSMUSG00000017830	-1.77876	5.21416	30.5935	3.18165e-08	6.32763e-07
Trim34b	19305	ENSMUSG00000090215	-2.35129	1.32599	30.5382	3.27362e-08	6.49898e-07
Serinc2	12041	ENSMUSG00000023232	-0.578234	6.99533	30.5291	3.2889e-08	6.51166e-07
Daxx	35732	ENSMUSG00000002307	-1.47868	6.6544	30.4711	3.38879e-08	6.69197e-07
Ddx58	10400	ENSMUSG00000040296	-1.99042	6.15232	30.4545	3.41789e-08	6.73753e-07
H2-T24	35939	ENSMUSG00000053835	-1.02555	4.94167	30.4441	3.43633e-08	6.76194e-07
Nsmf	2453	ENSMUSG00000006476	-0.646023	4.99836	30.4286	3.4639e-08	6.80422e-07
Cebpd	34090	ENSMUSG00000071637	-0.976924	4.78572	30.4248	3.47063e-08	6.80547e-07
Gm26667	34825	ENSMUSG00000097418	-2.02354	1.18384	30.2612	3.77598e-08	7.33984e-07
Gm11545	28963	ENSMUSG00000075611	-0.641552	5.30353	30.2153	3.86657e-08	7.50289e-07
Cln3	19716	ENSMUSG00000030720	-0.593391	6.3613	30.1337	4.03259e-08	7.81147e-07
Basp1	32843	ENSMUSG00000045763	-0.88574	5.42576	30.1241	4.05259e-08	7.83665e-07
Dock10	768	ENSMUSG00000038608	-0.511418	7.23228	29.969	4.39003e-08	8.45989e-07
Trim21	19170	ENSMUSG00000030966	-1.68494	4.13104	29.897	4.55624e-08	8.76507e-07
Ppp1r15a	18288	ENSMUSG00000040435	-0.677784	4.40944	29.8776	4.60188e-08	8.83766e-07
Rab32	20204	ENSMUSG00000019832	-0.5896	5.73276	29.62	5.25607e-08	1.00422e-06
Trim25	28898	ENSMUSG00000000275	-0.907544	7.96382	29.562	5.41565e-08	1.03119e-06
Spty2d1	18346	ENSMUSG00000049516	-0.62729	4.91212	29.5492	5.45155e-08	1.03626e-06
Rgs20	15	ENSMUSG00000002459	-1.61827	0.514563	29.4886	5.62459e-08	1.06733e-06
Oas3	14252	ENSMUSG00000032661	-0.921131	6.64261	29.4581	5.7139e-08	1.08244e-06
Fosl1	37996	ENSMUSG00000024912	-0.564262	6.5889	29.2942	6.21823e-08	1.17203e-06
Gpr65	32164	ENSMUSG00000021886	-0.965635	3.11048	29.2659	6.30952e-08	1.18723e-06
Cdk18	1225	ENSMUSG00000026437	-0.589258	5.65109	29.1658	6.64408e-08	1.24599e-06
5830432E09Rik	19909	ENSMUSG00000097471	-1.22467	1.82037	29.1522	6.69105e-08	1.25269e-06
Anxa3	13802	ENSMUSG00000029484	-1.05247	2.5481	29.1321	6.76085e-08	1.26365e-06
Slc12a4	23004	ENSMUSG00000017765	-0.550217	6.46296	28.9031	7.60893e-08	1.41506e-06
Procr	5022	ENSMUSG00000027611	-1.03317	4.13728	28.8487	7.82572e-08	1.45296e-06
Actb	14696	ENSMUSG00000029580	-0.450431	12.7008	28.7692	8.1537e-08	1.51134e-06
Rsbn1	9456	ENSMUSG00000044098	-0.607264	5.31255	28.7016	8.44323e-08	1.56242e-06
Mx1	35009	ENSMUSG00000000386	-3.74097	3.40194	28.6369	8.7304e-08	1.61023e-06
Wdr1	13321	ENSMUSG00000005103	-0.40992	8.73976	28.6089	8.85747e-08	1.62829e-06
Ifi202b	1787	ENSMUSG00000026535	-2.05727	4.83081	28.4214	9.75817e-08	1.78506e-06
Psmd10	7816	ENSMUSG00000031429	-0.600601	5.21248	28.2151	1.08555e-07	1.96647e-06
Tpm2	10538	ENSMUSG00000028464	-1.90566	0.300098	28.1662	1.11333e-07	2.01029e-06
Rhof	14321	ENSMUSG00000029449	-0.652391	6.19231	28.0844	1.16141e-07	2.07697e-06
Usb1	22881	ENSMUSG00000031792	-0.603696	5.51302	28.0088	1.20765e-07	2.15622e-06
Papd7	30924	ENSMUSG00000034575	-0.815045	6.58413	27.8619	1.30291e-07	2.30671e-06
Spata13	24662	ENSMUSG00000021990	-0.599263	6.1613	27.8073	1.3402e-07	2.36268e-06
Gm16712	36334	ENSMUSG00000097077	-1.20363	1.90413	27.6501	1.45367e-07	2.54665e-06
Stk40	11914	ENSMUSG00000042608	-0.905119	5.5562	27.6123	1.48236e-07	2.59285e-06
Fads3	38188	ENSMUSG00000024664	-1.03094	2.34353	27.5864	1.50232e-07	2.62365e-06
Stat5a	29293	ENSMUSG00000004043	-0.814544	4.95108	27.4387	1.62154e-07	2.82305e-06
Myo1d	28681	ENSMUSG00000035441	-0.86651	5.2646	27.3634	1.68596e-07	2.92609e-06
Tha1	29782	ENSMUSG00000017713	-1.21518	1.52621	27.2138	1.82155e-07	3.14675e-06
Znfx1	5320	ENSMUSG00000039501	-1.28568	7.18675	27.1708	1.86253e-07	3.20762e-06
Rrad	22938	ENSMUSG00000031880	-1.00053	2.80537	27.1576	1.87523e-07	3.22453e-06
Wsb2	14205	ENSMUSG00000029364	-0.627336	5.96295	26.9706	2.06579e-07	3.53048e-06
Mtmr14	16239	ENSMUSG00000030269	-0.679505	5.03974	26.9539	2.08371e-07	3.55567e-06
St3gal6	34691	ENSMUSG00000022747	-0.633581	4.5778	26.9201	2.12046e-07	3.61287e-06
Gas7	28173	ENSMUSG00000033066	-0.44141	7.94699	26.8787	2.16633e-07	3.6798e-06
1500012F01Rik	5321	ENSMUSG00000074578	-0.600079	5.81428	26.841	2.20897e-07	3.74653e-06
Enpp4	36164	ENSMUSG00000023961	-1.10859	2.98407	26.7959	2.26112e-07	3.82688e-06
Oas1a	14260	ENSMUSG00000052776	-0.920481	6.2217	26.6938	2.38389e-07	4.01881e-06
Fhl3	11878	ENSMUSG00000032643	-0.486718	6.87468	26.6548	2.4325e-07	4.09459e-06
Flrt2	32157	ENSMUSG00000047414	-0.959557	5.56035	26.6376	2.45425e-07	4.12439e-06
Ppp1r10	35928	ENSMUSG00000039220	-0.489989	6.81554	26.6349	2.45758e-07	4.12439e-06
Gm11425	28724	ENSMUSG00000082419	-1.15038	1.65811	26.4944	2.64303e-07	4.396e-06
Car13	8364	ENSMUSG00000027555	-0.87404	2.99919	26.2925	2.93419e-07	4.84423e-06
H2-Q6	35890	ENSMUSG00000073409	-0.635175	4.15126	26.2092	3.06355e-07	5.05034e-06
Micall2	14651	ENSMUSG00000036718	-0.650056	3.92232	26.2017	3.07556e-07	5.06267e-06
Ptpn5	18348	ENSMUSG00000030854	-0.666132	4.77273	26.1867	3.09958e-07	5.09471e-06
Ubash3b	25674	ENSMUSG00000032020	-0.603862	6.10502	26.0922	3.25499e-07	5.32665e-06
Tcirg1	37906	ENSMUSG00000001750	-0.587522	8.40042	26.0751	3.28389e-07	5.35825e-06
P2ry6	19127	ENSMUSG00000048779	-0.474696	7.11947	26.0415	3.34163e-07	5.44452e-06
I830012O16Rik	38531	ENSMUSG00000062488	-3.26327	2.87988	25.853	3.68435e-07	5.97677e-06
Adar	9043	ENSMUSG00000027951	-0.973112	7.65491	25.8439	3.70171e-07	5.99623e-06
Rcan1	34955	ENSMUSG00000022951	-0.698965	7.86372	25.839	3.71118e-07	6.00288e-06
Denr	14350	ENSMUSG00000023106	-0.502301	7.70599	25.769	3.84821e-07	6.20656e-06
Eif1	29264	ENSMUSG00000035530	-0.458181	8.18405	25.7566	3.87301e-07	6.23755e-06
Bst2	22509	ENSMUSG00000046718	-0.821071	6.62324	25.7139	3.95965e-07	6.33148e-06
Npnt	9768	ENSMUSG00000040998	-1.53034	0.406254	25.6753	4.03958e-07	6.45006e-06
Daam1	31867	ENSMUSG00000034574	-0.618307	4.34449	25.5754	4.25433e-07	6.76395e-06
Mfap3l	22336	ENSMUSG00000031647	-0.942373	2.4844	25.4796	4.4709e-07	7.08811e-06
Ifi204	1782	ENSMUSG00000073489	-2.0838	4.33799	25.4472	4.54662e-07	7.19795e-06
Dusp1	35511	ENSMUSG00000024190	-0.696022	4.07738	25.3948	4.67171e-07	7.38553e-06
Gyk	6973	ENSMUSG00000025059	-0.580208	5.40484	25.2532	5.02763e-07	7.89239e-06
Ocstamp	5284	ENSMUSG00000027670	-0.959339	5.18734	25.2435	5.05298e-07	7.90996e-06
Psmd8	17827	ENSMUSG00000030591	-0.418376	8.09728	25.237	5.06992e-07	7.92538e-06
Slc30a1	1985	ENSMUSG00000037434	-0.680072	4.80732	25.2089	5.1445e-07	8.01241e-06
Rsad2	31550	ENSMUSG00000020641	-3.61331	6.34619	25.1943	5.18353e-07	8.0579e-06
Fam129b	2776	ENSMUSG00000026796	-0.450602	9.90899	25.1609	5.2741e-07	8.18731e-06
H2-K1	35744	ENSMUSG00000061232	-0.504455	6.7783	25.1467	5.31316e-07	8.2365e-06
Rnd1	33707	ENSMUSG00000054855	-0.884781	2.58093	25.1139	5.40408e-07	8.36584e-06
Parp10	33240	ENSMUSG00000063268	-1.58913	5.15881	25.078	5.50562e-07	8.48776e-06
Abi1	2405	ENSMUSG00000058835	-0.480265	6.81432	24.827	6.27135e-07	9.60203e-06
Micall1	33356	ENSMUSG00000033039	-0.597888	5.91622	24.8101	6.32643e-07	9.67312e-06
Rgcc	24920	ENSMUSG00000022018	-1.28298	1.66488	24.784	6.4126e-07	9.79148e-06
Cdc42ep4	29621	ENSMUSG00000041598	-0.570236	5.26191	24.7176	6.6376e-07	1.01212e-05
9130208D14Rik	19385	ENSMUSG00000086513	-1.78932	0.738838	24.6655	6.81939e-07	1.03842e-05
Sik3	25782	ENSMUSG00000034135	-0.589855	7.11833	24.6139	7.00463e-07	1.05942e-05
Cited2	20251	ENSMUSG00000039910	-0.372597	9.73494	24.5241	7.33851e-07	1.10403e-05
Ncs1	2705	ENSMUSG00000062661	-0.544863	5.69586	24.2911	8.28209e-07	1.23921e-05
Fos	32062	ENSMUSG00000021250	-0.624161	7.09795	24.2874	8.29805e-07	1.23994e-05
E330009J07Rik	15256	ENSMUSG00000037172	-0.617193	4.01158	24.2723	8.36312e-07	1.24785e-05
Riok3	37162	ENSMUSG00000024404	-0.518593	6.54245	24.1437	8.94096e-07	1.3289e-05
Arl5c	29113	ENSMUSG00000038352	-1.1999	1.31433	24.0479	9.39668e-07	1.38279e-05
Cmpk2	31551	ENSMUSG00000020638	-3.10569	5.59773	24.0252	9.50834e-07	1.39468e-05
Fnbp1l	9677	ENSMUSG00000039735	-0.573295	8.09293	24.0203	9.53252e-07	1.39639e-05
Pvr	17494	ENSMUSG00000040511	-0.565903	4.97337	23.8593	1.03641e-06	1.5103e-05
Gm6548	36541	ENSMUSG00000091549	-1.21656	4.46685	23.7698	1.0857e-06	1.57596e-05
Dhrs3	12500	ENSMUSG00000066026	-0.829428	3.19662	23.7721	1.08445e-06	1.57596e-05
Nabp1	404	ENSMUSG00000026107	-0.754612	3.06347	23.7526	1.0955e-06	1.58745e-05
Slfn10-ps	28725	ENSMUSG00000072621	-0.739475	3.90875	23.7484	1.09788e-06	1.58745e-05
Mustn1	23833	ENSMUSG00000042485	-1.57205	2.17958	23.7319	1.10731e-06	1.59902e-05
H2-D1	35879	ENSMUSG00000073411	-0.406323	8.6482	23.6384	1.16245e-06	1.6663e-05
Filip1l	34686	ENSMUSG00000043336	-0.787046	4.28269	23.5978	1.18723e-06	1.69907e-05
Egr2	20739	ENSMUSG00000037868	-1.42492	4.03827	23.5876	1.19356e-06	1.70594e-05
Flt1	14806	ENSMUSG00000029648	-0.538173	6.9059	23.5284	1.23084e-06	1.75697e-05
Pld3	17755	ENSMUSG00000003363	-0.54226	6.51963	23.487	1.25762e-06	1.79291e-05
Bhlhe40	16209	ENSMUSG00000030103	-1.19004	5.54518	23.4653	1.27187e-06	1.81026e-05
Stxbp3a	9574	ENSMUSG00000027882	-0.62753	5.65422	23.406	1.31167e-06	1.86283e-05
Ak4	11355	ENSMUSG00000028527	-0.577837	4.40425	23.3703	1.33624e-06	1.89292e-05
Pdlim7	30701	ENSMUSG00000021493	-0.503413	6.44999	23.356	1.34623e-06	1.90225e-05
Acot7	12718	ENSMUSG00000028937	-0.446988	7.4511	23.3575	1.34516e-06	1.90225e-05
Dtx3l	34448	ENSMUSG00000049502	-1.30834	5.97181	23.1662	1.48587e-06	2.09428e-05
Zbtb7a	21030	ENSMUSG00000035011	-0.429529	7.54172	23.1148	1.52612e-06	2.14829e-05
B4galt5	5334	ENSMUSG00000017929	-0.633012	5.63557	22.9553	1.65811e-06	2.32823e-05
Gm11216	10943	ENSMUSG00000086755	-1.38167	0.527868	22.8472	1.75401e-06	2.44751e-05
Gm7609	811	ENSMUSG00000079457	-1.59772	0.503268	22.7825	1.81407e-06	2.52816e-05
B2m	4361	ENSMUSG00000060802	-0.47467	9.12146	22.6261	1.9679e-06	2.71546e-05
Ebi3	36333	ENSMUSG00000003206	-0.6852	3.5925	22.5965	1.99845e-06	2.75082e-05
Zswim4	22689	ENSMUSG00000035671	-0.560913	5.37699	22.485	2.11796e-06	2.9046e-05
Pstpip2	37813	ENSMUSG00000025429	-0.556344	4.6387	22.4662	2.13876e-06	2.92953e-05
Gbp7	9845	ENSMUSG00000040253	-2.38779	2.16071	22.411	2.20111e-06	3.00755e-05
Dusp18	27027	ENSMUSG00000047205	-0.715009	3.32479	22.3726	2.24555e-06	3.05706e-05
4930404N11Rik	21052	ENSMUSG00000020234	-1.00404	2.24605	22.3215	2.30616e-06	3.13576e-05
Cdk6	12855	ENSMUSG00000040274	-0.539534	5.00088	22.3057	2.32521e-06	3.15782e-05
Map3k8	37096	ENSMUSG00000024235	-1.21503	2.6829	22.2102	2.44377e-06	3.31079e-05
Tmco3	21842	ENSMUSG00000038497	-0.589677	4.4922	22.1883	2.47177e-06	3.34467e-05
Fbxw17	30623	ENSMUSG00000037816	-0.902868	4.06133	22.1595	2.50909e-06	3.39106e-05
Apobr	19718	ENSMUSG00000042759	-0.43627	7.39487	22.1465	2.52618e-06	3.41004e-05
Trim34a	19300	ENSMUSG00000056144	-1.95541	1.32042	22.1315	2.54599e-06	3.43263e-05
C3ar1	16419	ENSMUSG00000040552	-0.591911	5.49929	21.9291	2.82908e-06	3.7869e-05
Rab15	31926	ENSMUSG00000021062	-1.6798	1.30774	21.8522	2.9448e-06	3.92769e-05
Trim30a	19312	ENSMUSG00000030921	-1.55523	4.68232	21.7977	3.02967e-06	4.02647e-05
Rarg	33844	ENSMUSG00000001288	-0.621775	3.97243	21.6893	3.20574e-06	4.25036e-05
Smyd5	15961	ENSMUSG00000033706	-0.454673	6.96845	21.6563	3.26141e-06	4.31394e-05
Gm14636	5978	ENSMUSG00000073274	-1.43869	1.29079	21.5749	3.40275e-06	4.47969e-05
Ppfibp1	16860	ENSMUSG00000016487	-0.420688	7.46157	21.5027	3.53334e-06	4.6298e-05
Olfr934	25606	ENSMUSG00000057424	-0.789667	2.96663	21.3351	3.856e-06	5.02314e-05
Rrp9	26606	ENSMUSG00000041506	-0.495587	6.55378	21.2658	3.99801e-06	5.19601e-05
St7	14982	ENSMUSG00000029534	-0.570436	4.46039	21.2105	4.11506e-06	5.34193e-05
Irak3	21454	ENSMUSG00000020227	-0.73363	3.09917	20.9761	4.65057e-06	5.98842e-05
Piezo1	23276	ENSMUSG00000014444	-0.432521	7.22428	20.9642	4.67955e-06	6.0188e-05
Zeb2	2968	ENSMUSG00000026872	-0.477166	7.35994	20.896	4.84911e-06	6.22256e-05
Rffl	28712	ENSMUSG00000020696	-0.717765	3.12957	20.8844	4.87845e-06	6.24587e-05
Uba7	26664	ENSMUSG00000032596	-1.5106	5.52881	20.8196	5.04647e-06	6.4536e-05
Ogfr	5607	ENSMUSG00000049401	-0.764458	6.77527	20.7814	5.14818e-06	6.56863e-05
Txlnb	20253	ENSMUSG00000039891	-1.50622	0.0747122	20.7224	5.30915e-06	6.75858e-05
Oas1h	14258	ENSMUSG00000001168	-2.04517	0.173673	20.7097	5.34458e-06	6.79595e-05
Mir221	5976	ENSMUSG00000065422	-1.28534	0.986488	20.5977	5.66635e-06	7.17246e-05
Actr3	1151	ENSMUSG00000026341	-0.342304	9.05179	20.5207	5.8991e-06	7.4502e-05
Exoc3l4	32473	ENSMUSG00000021280	-1.19223	1.06619	20.4906	5.99261e-06	7.55976e-05
Rhbdf1	27445	ENSMUSG00000020282	-0.781241	3.10235	20.3827	6.34002e-06	7.95313e-05
Hipk2	15231	ENSMUSG00000061436	-0.491496	5.72033	20.3323	6.50922e-06	8.15622e-05
Nrp2	546	ENSMUSG00000025969	-0.399745	9.07786	20.3025	6.61135e-06	8.26567e-05
Rplp1	26010	ENSMUSG00000007892	-0.366157	9.70721	20.2462	6.80881e-06	8.50302e-05
Tns3	27152	ENSMUSG00000020422	-0.455242	8.74128	20.0707	7.46314e-06	9.25811e-05
Ralgapa2	4754	ENSMUSG00000037110	-0.541367	4.12759	20.0249	7.64397e-06	9.45896e-05
Slc39a4	33267	ENSMUSG00000063354	-1.24205	0.808281	19.9949	7.76478e-06	9.57913e-05
Ptpn23	26765	ENSMUSG00000036057	-0.471368	6.27251	19.917	8.08794e-06	9.93395e-05
H2-Q5	35888	ENSMUSG00000055413	-0.769161	2.87389	19.8975	8.1709e-06	0.000100248
Mfsd2a	11827	ENSMUSG00000028655	-0.757998	3.21657	19.8643	8.31385e-06	0.000101667
Tyk2	25343	ENSMUSG00000032175	-0.489732	5.7998	19.8606	8.3301e-06	0.000101755
Agpat9	13861	ENSMUSG00000029314	-1.06946	3.10242	19.8537	8.35986e-06	0.000102007
Ddx60	22349	ENSMUSG00000037921	-2.32174	1.64394	19.8497	8.3776e-06	0.000102112
Tlr9	26594	ENSMUSG00000045322	-0.683709	4.0176	19.842	8.41147e-06	0.000102413
Tapbp	35733	ENSMUSG00000024308	-0.588291	7.81537	19.6072	9.51096e-06	0.000115048
Mt1	22844	ENSMUSG00000031765	-0.464952	7.29666	19.5993	9.55034e-06	0.000115274
Lta	35869	ENSMUSG00000024402	-1.54421	0.246114	19.5422	9.84005e-06	0.000118388
Npl	1451	ENSMUSG00000042684	-0.607295	4.19421	19.472	1.02087e-05	0.000122691
Ccdc137	29860	ENSMUSG00000049957	-0.478732	5.78384	19.4487	1.03339e-05	0.000124062
Tmeff1	10667	ENSMUSG00000028347	-0.516264	5.1585	19.3195	1.10569e-05	0.000132175
Siglece	18158	ENSMUSG00000030474	-0.86185	2.43326	19.2482	1.14778e-05	0.000136913
null	37382	ENSMUSG00000001379	-0.625473	4.27189	19.2068	1.17297e-05	0.00013962
Padi2	12368	ENSMUSG00000028927	-0.853784	2.85926	19.0725	1.25847e-05	0.00014932
Dusp16	16714	ENSMUSG00000030203	-0.653629	3.87251	18.8792	1.3926e-05	0.00016471
Serpinb9	30428	ENSMUSG00000045827	-0.65024	3.98203	18.8656	1.4026e-05	0.000165717
Sf3b4	9274	ENSMUSG00000068856	-0.356075	8.38291	18.8241	1.43343e-05	0.000169002
Rnf213	29825	ENSMUSG00000070327	-1.24956	8.12516	18.8043	1.44837e-05	0.000170584
Prdx1	11629	ENSMUSG00000028691	-0.409576	10.0349	18.7207	1.51328e-05	0.000177667
H2-Q10	35894	ENSMUSG00000067235	-0.930902	1.80666	18.675	1.55001e-05	0.000181788
Ifi203	1786	ENSMUSG00000039997	-1.90083	6.02512	18.6177	1.59733e-05	0.000187142
Hmga1-rs1	29894	ENSMUSG00000078249	-0.484111	7.15428	18.5187	1.68243e-05	0.000196494
Rtn2	17453	ENSMUSG00000030401	-1.10855	1.09775	18.5107	1.68953e-05	0.000197118
Sh2d6	15843	ENSMUSG00000052631	-1.01159	2.73259	18.4962	1.70246e-05	0.000198419
Nfkbil1	35871	ENSMUSG00000042419	-0.48393	5.27158	18.3739	1.81523e-05	0.000210247
Ifi35	29333	ENSMUSG00000010358	-0.95109	5.44545	18.1488	2.04297e-05	0.000233719
Fau	38042	ENSMUSG00000038274	-0.373289	8.76724	18.1029	2.09282e-05	0.000238932
Rhog	19161	ENSMUSG00000073982	-0.442171	6.86515	17.9581	2.25816e-05	0.000255978
Casc4	4353	ENSMUSG00000060227	-0.649913	3.16637	17.9473	2.27109e-05	0.000257183
Gpr68	32192	ENSMUSG00000047415	-0.527463	4.4623	17.9044	2.32285e-05	0.000262513
Micu3	22189	ENSMUSG00000039478	-0.705641	3.73447	17.8871	2.34403e-05	0.000264639
Rbpj	13409	ENSMUSG00000039191	-0.325926	8.97392	17.8796	2.35327e-05	0.000265413
Atp9b	37837	ENSMUSG00000024566	-0.463637	6.11346	17.8758	2.35801e-05	0.00026568
Fyb	32750	ENSMUSG00000022148	-0.489115	6.99531	17.8579	2.38025e-05	0.000267803
Stat1	410	ENSMUSG00000026104	-1.23284	6.69301	17.7804	2.4792e-05	0.000277655
Jag1	4654	ENSMUSG00000027276	-0.68183	5.31706	17.7677	2.49579e-05	0.000278955
Pgm5	38421	ENSMUSG00000041731	-1.4873	0.333851	17.6441	2.66347e-05	0.00029651
Gm9625	30913	ENSMUSG00000097906	-0.419468	6.64405	17.4683	2.92138e-05	0.000321381
Ercc1	17456	ENSMUSG00000003549	-0.529168	5.59229	17.4086	3.01464e-05	0.000330016
Lgals3bp	29796	ENSMUSG00000033880	-0.664448	7.58378	17.3948	3.03656e-05	0.000331766
St3gal3	11693	ENSMUSG00000028538	-0.525355	4.43387	17.3907	3.04306e-05	0.000332151
Fam133b	12857	ENSMUSG00000058503	-0.531208	6.0773	17.346	3.1155e-05	0.000339395
Fam96b	22939	ENSMUSG00000031879	-0.442771	5.76855	17.3111	3.1733e-05	0.000345355
Stat2	21576	ENSMUSG00000040033	-1.52578	6.10081	17.2848	3.2175e-05	0.000349619
Rab11fip4os1	28655	ENSMUSG00000087434	-1.10061	1.23643	17.1572	3.44103e-05	0.000371239
Rltpr	22986	ENSMUSG00000050357	-1.21771	0.378735	17.112	3.52389e-05	0.000379812
St6galnac4	2755	ENSMUSG00000079442	-0.489843	5.56602	17.0886	3.56767e-05	0.00038416
Ppp1r1a	33903	ENSMUSG00000022490	-1.28208	0.199269	16.9474	3.8429e-05	0.000411418
Tspan5	9830	ENSMUSG00000028152	-0.485571	5.3232	16.8412	4.06415e-05	0.000433859
Tmem98	28683	ENSMUSG00000035413	-0.872214	2.43254	16.8387	4.06946e-05	0.000434011
Sash1	20194	ENSMUSG00000015305	-0.454375	6.32419	16.8192	4.11147e-05	0.000437239
Etv3	8931	ENSMUSG00000003382	-0.432387	6.14942	16.6974	4.38413e-05	0.000464029
Opn3	1810	ENSMUSG00000026525	-1.45364	2.41507	16.6861	4.41028e-05	0.000465917
Phf11d	24646	ENSMUSG00000068245	-1.1459	5.5358	16.6455	4.50562e-05	0.000473747
Emr1	36399	ENSMUSG00000004730	-0.394315	6.76486	16.5726	4.68228e-05	0.000490017
Top1	5149	ENSMUSG00000070544	-0.367412	7.97345	16.5591	4.71573e-05	0.000493056
Cth	9976	ENSMUSG00000028179	-0.643112	3.60976	16.5495	4.73974e-05	0.000494191
Anxa2	26135	ENSMUSG00000032231	-0.31132	9.48762	16.5511	4.73562e-05	0.000494191
Pear1	8937	ENSMUSG00000028073	-1.21498	0.679112	16.4659	4.95327e-05	0.000515002
Dhx34	17362	ENSMUSG00000006019	-0.386322	7.15278	16.4505	4.99373e-05	0.000517764
Mir142b	28861	ENSMUSG00000065420	-0.868384	1.8608	16.4128	5.09394e-05	0.000526688
Cdk5r1	28680	ENSMUSG00000048895	-1.19171	2.9391	16.3934	5.14639e-05	0.000531619
2310014L17Rik	17233	ENSMUSG00000033967	-0.926382	1.59873	16.3661	5.22105e-05	0.000538834
Arg2	31945	ENSMUSG00000021125	-1.34073	0.47741	16.3368	5.3024e-05	0.000546724
Cyfip1	18402	ENSMUSG00000030447	-0.322799	8.13743	16.3204	5.34852e-05	0.000549958
Znrd1	36016	ENSMUSG00000036315	-0.456089	4.64169	16.2212	5.63597e-05	0.00057739
Pdgfa	14631	ENSMUSG00000025856	-0.492668	5.67307	16.1977	5.70625e-05	0.000582455
Arpc5	1440	ENSMUSG00000008475	-0.30815	8.71401	16.1862	5.74103e-05	0.00058547
Spaca6	35201	ENSMUSG00000080316	-0.777551	4.1295	16.1673	5.79855e-05	0.000590797
Msantd3	10666	ENSMUSG00000039693	-0.460356	4.64679	16.0896	6.0414e-05	0.00061442
Rac2	33334	ENSMUSG00000033220	-0.320677	8.99822	16.0871	6.04948e-05	0.000614682
Arhgap22	23891	ENSMUSG00000063506	-1.21172	0.602699	16.0673	6.11302e-05	0.000620012
Gbp3	9846	ENSMUSG00000028268	-2.47781	1.89815	16.0361	6.21461e-05	0.000629744
Grasp	33802	ENSMUSG00000000531	-0.589253	3.43056	16.0246	6.25244e-05	0.000633003
Dnajb5	10515	ENSMUSG00000036052	-0.908153	2.13088	16.0194	6.26971e-05	0.000634177
Eif2ak2	36542	ENSMUSG00000024079	-0.888623	6.57461	15.983	6.39148e-05	0.000644744
Myd88	26881	ENSMUSG00000032508	-0.532121	6.60351	15.9601	6.46905e-05	0.000650221
Jund	22471	ENSMUSG00000071076	-0.508424	6.0748	15.9609	6.4665e-05	0.000650221
Lgals9	28639	ENSMUSG00000001123	-1.02707	5.15007	15.9493	6.50604e-05	0.000653352
Gm23201	5324	ENSMUSG00000077565	-0.774896	2.32116	15.9413	6.53373e-05	0.000654784
Cd80	34523	ENSMUSG00000075122	-1.17207	0.44513	15.9043	6.66267e-05	0.000666484
Gm13822	14134	ENSMUSG00000087477	-1.49524	0.164716	15.8724	6.77608e-05	0.000675011
Jarid2	30551	ENSMUSG00000038518	-0.600587	6.68951	15.8638	6.80682e-05	0.00067747
Emp3	18319	ENSMUSG00000040212	-0.355661	8.57335	15.8289	6.93352e-05	0.000688241
Ccdc86	38220	ENSMUSG00000024732	-0.421994	7.04951	15.8245	6.94966e-05	0.000689232
Cib1	18808	ENSMUSG00000030538	-0.453903	5.48673	15.7903	7.07648e-05	0.000700565
Dgke	28899	ENSMUSG00000000276	-0.479457	4.0637	15.7497	7.23011e-05	0.000714509
Sat1	8090	ENSMUSG00000025283	-0.518592	6.30403	15.7005	7.42059e-05	0.000731392
Tap1	35763	ENSMUSG00000037321	-1.17149	5.02313	15.6893	7.46452e-05	0.000735074
8030451A03Rik	10942	ENSMUSG00000073821	-1.31286	0.456608	15.6786	7.50698e-05	0.000737956
Zufsp	20424	ENSMUSG00000039531	-0.836055	3.51407	15.6727	7.53042e-05	0.000739609
Gm7592	819	ENSMUSG00000090186	-1.85344	2.1107	15.639	7.66588e-05	0.000750276
Ifitm2	19991	ENSMUSG00000060591	-0.390396	7.20987	15.604	7.80896e-05	0.000762943
Ccrn4l	8608	ENSMUSG00000023087	-0.318354	8.09198	15.5865	7.88136e-05	0.000769345
Lcat	23003	ENSMUSG00000035237	-0.952588	1.63381	15.5619	7.9848e-05	0.000778762
Pomgnt1	11611	ENSMUSG00000028700	-0.413476	6.28111	15.4692	8.38621e-05	0.000812241
Apbb2	13482	ENSMUSG00000029207	-0.484833	4.79164	15.4554	8.44741e-05	0.00081746
Mthfs	26415	ENSMUSG00000066442	-0.822647	1.86717	15.4073	8.66546e-05	0.000836389
Trmt13	9627	ENSMUSG00000033439	-0.526523	3.69592	15.3502	8.93097e-05	0.000861272
Cebpb	5348	ENSMUSG00000056501	-0.566078	5.44717	15.3371	8.99349e-05	0.000866554
Cd63	21621	ENSMUSG00000025351	-0.348231	7.42692	15.3338	9.00904e-05	0.000867305
Pfkfb3	2259	ENSMUSG00000026773	-0.483689	4.46431	15.2924	9.2088e-05	0.000884251
Irf1	27808	ENSMUSG00000018899	-1.61545	4.86904	15.2499	9.41836e-05	0.000902048
Tpm1	26117	ENSMUSG00000032366	-0.349811	7.60477	15.2332	9.50177e-05	0.000909257
Zdhhc18	12147	ENSMUSG00000037553	-0.456699	5.89589	15.1838	9.75389e-05	0.000932586
Rpl41	21601	ENSMUSG00000093674	-0.328714	9.59146	15.165	9.85114e-05	0.000941079
Parp9	34449	ENSMUSG00000022906	-1.01207	6.17498	15.0803	0.000103034	0.000980091
Zfp719	18155	ENSMUSG00000030469	-0.55114	3.4239	15.0573	0.000104297	0.000990427
Dcp2	37506	ENSMUSG00000024472	-0.511341	5.99331	15.0369	0.000105428	0.000999462
Il1rl1	333	ENSMUSG00000026069	-0.477169	6.0738	14.9803	0.000108637	0.00102609
Slc25a25	2748	ENSMUSG00000026819	-0.421527	5.54751	14.9705	0.000109207	0.00103005
Lck	12012	ENSMUSG00000000409	-0.928677	2.08247	14.9068	0.000112955	0.00106182
Gan	23171	ENSMUSG00000052557	-0.572813	3.7372	14.9071	0.000112937	0.00106182
Gm20678	23684	ENSMUSG00000093760	-0.621888	3.39486	14.8469	0.000116602	0.00109242
Il1rap	34324	ENSMUSG00000022514	-0.485111	4.55766	14.8474	0.00011657	0.00109242
Ier2	22696	ENSMUSG00000053560	-0.474285	5.45644	14.794	0.000119918	0.00112161
Gm8113	24075	ENSMUSG00000089901	-1.33207	1.571	14.7591	0.000122155	0.00114063
Cnot7	22192	ENSMUSG00000031601	-0.388885	6.44547	14.7484	0.00012285	0.00114615
Rfwd2	1507	ENSMUSG00000040782	-0.426128	5.67997	14.6386	0.000130222	0.0012119
Chmp4b	4986	ENSMUSG00000038467	-0.37176	7.48508	14.6393	0.000130171	0.0012119
Fabp5	8335	ENSMUSG00000027533	-0.518461	5.26848	14.6215	0.000131407	0.00122191
Prss50	26781	ENSMUSG00000048752	-1.16055	0.292015	14.5986	0.000133016	0.00123584
Grwd1	18313	ENSMUSG00000053801	-0.401396	6.53578	14.5794	0.000134376	0.00124537
Nbeal2	26771	ENSMUSG00000056724	-0.469455	5.42204	14.4927	0.000140706	0.00129651
Pla2g5	12313	ENSMUSG00000041193	-0.831137	1.79553	14.4278	0.000145637	0.00133974
Gpr157	12680	ENSMUSG00000047875	-1.05966	0.89766	14.4062	0.000147319	0.00135299
Tnip3	15650	ENSMUSG00000044162	-0.358421	6.9669	14.3936	0.000148309	0.00136096
Cuedc1	28879	ENSMUSG00000018378	-0.56152	3.58119	14.3812	0.000149284	0.00136542
Alpk2	37693	ENSMUSG00000032845	-0.813221	2.60528	14.3732	0.000149924	0.00137016
Ppm1k	15586	ENSMUSG00000037826	-1.04718	3.03014	14.3412	0.00015249	0.00139247
Ifitm6	19994	ENSMUSG00000059108	-0.515492	3.84952	14.3266	0.000153681	0.001402
Psme2	24547	ENSMUSG00000079197	-0.414925	6.48686	14.3253	0.000153785	0.001402
Mob3b	10360	ENSMUSG00000073910	-1.00809	2.65885	14.2872	0.000156925	0.00142714
Kcnn4	17635	ENSMUSG00000054342	-0.354107	8.42304	14.2285	0.000161896	0.00146756
Rusc2	10528	ENSMUSG00000035969	-0.521482	4.95937	14.2118	0.000163342	0.00147948
4930599N23Rik	15235	ENSMUSG00000073144	-0.933975	2.05344	14.1973	0.00016461	0.00148975
Kremen1	27075	ENSMUSG00000020393	-0.607557	3.53555	14.1789	0.000166222	0.00150191
Ensa	9252	ENSMUSG00000038619	-0.380172	6.66298	14.1509	0.000168719	0.00152201
Lims2	37291	ENSMUSG00000024395	-1.11214	1.46265	14.1423	0.000169489	0.00152627
Eme2	35427	ENSMUSG00000073436	-0.615867	2.8721	14.1429	0.000169437	0.00152627
Rassf1	26642	ENSMUSG00000010067	-0.563393	4.10828	14.1411	0.000169601	0.00152627
Nfatc1	37836	ENSMUSG00000033016	-0.459244	10.0476	14.108	0.000172604	0.00155172
Slc25a33	12668	ENSMUSG00000028982	-0.509974	3.82829	14.083	0.000174914	0.00157029
AC133103.1	39050	ENSMUSG00000079190	-0.62415	4.94573	14.0498	0.000178029	0.0015957
Mafk	14654	ENSMUSG00000018143	-0.748616	5.50982	13.9991	0.000182895	0.00163669
Parp3	26605	ENSMUSG00000023249	-0.588163	3.66276	13.9489	0.000187851	0.00167566
Gm14963	38062	ENSMUSG00000085196	-1.19844	0.0431805	13.9149	0.000191281	0.0016997
Rhob	31420	ENSMUSG00000054364	-0.794626	2.69999	13.9146	0.000191306	0.0016997
Ipo4	24551	ENSMUSG00000002319	-0.362406	7.15003	13.8906	0.000193766	0.00171475
Tet2	9775	ENSMUSG00000040943	-0.526193	5.67379	13.8628	0.000196652	0.00173753
Cstb	20889	ENSMUSG00000005054	-0.341035	7.04635	13.8096	0.000202299	0.00178602
Alas1	26595	ENSMUSG00000032786	-0.42018	5.90728	13.7577	0.000207963	0.0018288
Rps14	37627	ENSMUSG00000024608	-0.317293	8.99497	13.7527	0.000208515	0.00183221
Pex5	16460	ENSMUSG00000005069	-0.420377	5.53496	13.7467	0.00020919	0.00183525
Eif5a	28284	ENSMUSG00000078812	-0.294595	11.1415	13.7475	0.000209095	0.00183525
Psma6	31730	ENSMUSG00000021024	-0.313204	7.73393	13.7325	0.00021078	0.0018463
Ttc19	28082	ENSMUSG00000042298	-0.422595	4.6494	13.7091	0.000213419	0.0018665
Amfr	22837	ENSMUSG00000031751	-0.379191	6.76381	13.7072	0.000213631	0.00186689
Antxr2	13810	ENSMUSG00000029338	-0.393671	6.63807	13.7033	0.000214072	0.00186929
Mllt11	9232	ENSMUSG00000053192	-0.477756	5.17849	13.6694	0.000217975	0.0019004
Sfn	12146	ENSMUSG00000047281	-0.99555	0.929818	13.6658	0.000218398	0.0019026
Syvn1	38039	ENSMUSG00000024807	-0.434752	6.41199	13.6485	0.000220412	0.00191865
Mitd1	295	ENSMUSG00000026088	-0.742072	4.85773	13.6372	0.000221745	0.00192575
AI504432	9504	ENSMUSG00000056145	-0.575481	3.11343	13.6081	0.000225206	0.00195126
Mdm2	21429	ENSMUSG00000020184	-0.335224	7.28588	13.5995	0.000226248	0.00195423
Lrp10	24492	ENSMUSG00000022175	-0.384022	6.50438	13.5928	0.00022705	0.00195964
Tpm4	22535	ENSMUSG00000031799	-0.310458	8.58012	13.5709	0.000229715	0.00198111
Spp1	13891	ENSMUSG00000029304	-0.357636	11.8227	13.5675	0.000230134	0.0019832
Plk2	31268	ENSMUSG00000021701	-1.04669	1.19555	13.5592	0.000231155	0.00198998
Tbc1d10a	27045	ENSMUSG00000034412	-0.448716	4.1455	13.5582	0.000231277	0.00198998
Ctsb	24708	ENSMUSG00000021939	-0.278115	9.80263	13.5093	0.000237389	0.0020363
Slc9a4	336	ENSMUSG00000026065	-0.446125	4.84034	13.4783	0.000241343	0.00206705
Rhbdd2	14501	ENSMUSG00000039917	-0.433791	4.30441	13.4626	0.000243367	0.00208279
4930440I19Rik	3388	ENSMUSG00000085431	-0.840446	1.82217	13.3855	0.000253577	0.00216189
Clec12a	16600	ENSMUSG00000053063	-0.382729	6.53034	13.348	0.000258692	0.00219879
BC022687	32511	ENSMUSG00000037594	-0.720947	2.1245	13.3375	0.000260155	0.00220954
Tm2d1	11293	ENSMUSG00000028563	-0.483778	4.31452	13.3008	0.000265289	0.00224631
Zswim7	28081	ENSMUSG00000014243	-0.555013	3.29492	13.2855	0.000267473	0.00226138
Trafd1	14268	ENSMUSG00000042726	-1.1383	6.20094	13.2761	0.000268817	0.00226931
Zc3hav1	15219	ENSMUSG00000029826	-0.585034	7.69389	13.2765	0.000268752	0.00226931
Slc41a1	1217	ENSMUSG00000013275	-0.436448	4.70903	13.2391	0.000274163	0.0023127
Zpr1	25788	ENSMUSG00000032078	-0.352975	6.70315	13.2332	0.000275037	0.00231832
Anpep	18798	ENSMUSG00000039062	-0.646416	3.18736	13.1966	0.000280451	0.00235862
Gramd1a	17940	ENSMUSG00000001248	-0.399025	5.66526	13.1467	0.000288019	0.00241862
Gna13	29574	ENSMUSG00000020611	-0.33679	7.25907	13.1361	0.000289664	0.00242879
Slc39a13	3831	ENSMUSG00000002105	-0.407399	5.99932	13.098	0.000295606	0.00247304
Rpl37a	663	ENSMUSG00000046330	-0.306544	8.33231	12.9673	0.000316972	0.00263209
Sepw1	17351	ENSMUSG00000041571	-0.454447	5.02932	12.8885	0.000330606	0.00272105
Flnc	15084	ENSMUSG00000068699	-0.888496	3.77963	12.8723	0.000333488	0.00274073
Synb	24801	ENSMUSG00000047977	-1.05827	0.711511	12.8426	0.000338816	0.00277635
Zc3h3	33215	ENSMUSG00000075600	-0.509592	4.79445	12.8341	0.000340362	0.00278698
Dnmt3l	20877	ENSMUSG00000000730	-0.609717	2.93169	12.8308	0.000340966	0.00278988
Clec7a	16605	ENSMUSG00000079293	-0.562853	3.66208	12.7832	0.000349748	0.00285339
AC168977.1	39132	ENSMUSG00000079808	-0.678104	5.873	12.7727	0.000351723	0.00286114
Aen	18775	ENSMUSG00000030609	-0.344066	7.11418	12.7737	0.000351529	0.00286114
Ahdc1	12121	ENSMUSG00000037692	-0.508067	3.53191	12.7644	0.000353276	0.00287168
Aoc2	29320	ENSMUSG00000078651	-0.539286	3.40759	12.7165	0.000362444	0.00293766
Mapk11	33581	ENSMUSG00000053137	-0.555213	3.0784	12.6882	0.000367971	0.00297814
Eif4a1	28256	ENSMUSG00000059796	-0.273545	10.728	12.6666	0.000372248	0.00300623
Ddhd1	24130	ENSMUSG00000037697	-0.516814	4.18773	12.6407	0.00037744	0.00303937
Clec5a	15264	ENSMUSG00000029915	-0.303636	9.11538	12.6368	0.000378229	0.00304353
Gm5931	5880	ENSMUSG00000068200	-1.2098	0.0874032	12.6262	0.000380385	0.00305868
Trim12c	19307	ENSMUSG00000057143	-0.898074	3.88671	12.5916	0.000387492	0.00311135
Capza2	14981	ENSMUSG00000015733	-0.289288	8.05651	12.5694	0.000392122	0.003144
Txn1	10802	ENSMUSG00000028367	-0.275824	8.7895	12.5616	0.000393763	0.00315264
Lrp4	3846	ENSMUSG00000027253	-1.23566	-0.129093	12.516	0.000403477	0.00322349
Rnf24	4572	ENSMUSG00000048911	-0.413618	5.40457	12.5016	0.000406612	0.00324158
Actn1	31956	ENSMUSG00000015143	-0.341726	6.94567	12.4898	0.000409186	0.00325978
Cdc37	25344	ENSMUSG00000019471	-0.281678	8.78252	12.4806	0.000411192	0.0032711
Sgsm1	14083	ENSMUSG00000042216	-0.450837	4.2329	12.4723	0.000413038	0.00328238
Fdx1l	25339	ENSMUSG00000079677	-0.380312	5.93852	12.4641	0.00041485	0.00329083
Rmdn2	36554	ENSMUSG00000036368	-0.670354	3.06769	12.435	0.000421366	0.00333778
Diexf	2001	ENSMUSG00000016181	-0.373842	6.17673	12.4283	0.000422877	0.00334738
Hspa1b	35832	ENSMUSG00000090877	-0.587672	4.18104	12.4103	0.000426968	0.00337737
Arl5b	2301	ENSMUSG00000017418	-0.419549	4.15031	12.3545	0.00043993	0.00346518
Npc2	32041	ENSMUSG00000021242	-0.415454	7.70218	12.3452	0.000442121	0.0034771
Lyrm4	30482	ENSMUSG00000046573	-0.391362	5.0425	12.3441	0.000442376	0.0034771
Tnfrsf12a	35342	ENSMUSG00000023905	-0.445243	5.4143	12.3273	0.000446376	0.00350362
M6pr	16398	ENSMUSG00000007458	-0.277011	8.94508	12.3239	0.000447188	0.00350753
Dennd5b	16893	ENSMUSG00000030313	-0.743115	2.33891	12.3111	0.000450274	0.00352925
Syt16	31895	ENSMUSG00000044912	-0.83902	1.26948	12.3062	0.00045145	0.00353599
Zfand3	35627	ENSMUSG00000044477	-0.385123	5.8789	12.2164	0.000473711	0.00368966
Psmd11	28679	ENSMUSG00000017428	-0.276269	8.24557	12.1844	0.000481916	0.00375096
Nab2	21540	ENSMUSG00000025402	-0.667922	5.77732	12.1788	0.000483362	0.00375959
Dennd4b	9069	ENSMUSG00000042404	-0.367032	6.24596	12.1554	0.000489469	0.00380445
Rgs8	1452	ENSMUSG00000042671	-0.93075	1.54976	12.1112	0.000501189	0.00388473
Rps10	35549	ENSMUSG00000052146	-0.272848	9.19582	12.0971	0.000504994	0.00391151
Ifrd1	31649	ENSMUSG00000001627	-0.319768	7.29746	12.079	0.000509927	0.00394426
Zfp513	13182	ENSMUSG00000043059	-0.411826	5.4848	12.0661	0.000513477	0.00396625
Sp110	821	ENSMUSG00000070034	-0.741098	5.53821	12.0466	0.000518877	0.00399965
Zmynd15	28321	ENSMUSG00000040829	-0.444566	4.2946	12.0344	0.000522279	0.00401756
Rasal1	14249	ENSMUSG00000029602	-0.99533	3.39862	12.0234	0.000525378	0.00403584
2011-09-01	13761	ENSMUSG00000058013	-0.301855	7.50171	11.9747	0.000539278	0.00413693
Pim3	33568	ENSMUSG00000035828	-0.468129	5.48573	11.9313	0.000551984	0.00422281
Gm17435	22553	ENSMUSG00000097000	-0.779256	1.62883	11.8786	0.000567815	0.00433206
Etv6	16707	ENSMUSG00000030199	-0.359734	6.3697	11.8371	0.000580632	0.00442247
Gm13841	14177	ENSMUSG00000083833	-0.304899	8.06906	11.8321	0.00058217	0.00442647
Runx2	36166	ENSMUSG00000039153	-1.24599	0.449206	11.7571	0.000606125	0.00459611
Gm10425	32474	ENSMUSG00000097081	-0.985458	1.01297	11.7326	0.000614156	0.00465385
Nle1	28715	ENSMUSG00000020692	-0.364617	6.3034	11.6996	0.000625119	0.00472731
A230028O05Rik	34313	ENSMUSG00000096960	-0.53054	3.15075	11.6904	0.000628247	0.00474454
Acy1	26600	ENSMUSG00000023262	-0.39447	5.34164	11.6781	0.000632412	0.00477144
Gm5431	27641	ENSMUSG00000058163	-2.40548	1.64601	11.6748	0.000633523	0.00477272
Myl6	21595	ENSMUSG00000090841	-0.282218	7.81986	11.6743	0.000633687	0.00477272
Csprs	39079	ENSMUSG00000062783	-1.88332	2.24659	11.6697	0.000635261	0.00477813
Srf	36218	ENSMUSG00000015605	-0.348281	6.49947	11.6428	0.000644515	0.00483797
Rps2	35413	ENSMUSG00000044533	-0.330023	8.45885	11.6428	0.000644508	0.00483797
Myo9b	22496	ENSMUSG00000004677	-0.353592	7.0472	11.6389	0.000645866	0.00484161
Etnk1	16810	ENSMUSG00000030275	-0.440486	6.72122	11.6238	0.000651148	0.00487793
Ctsz	5468	ENSMUSG00000016256	-0.25487	9.55025	11.6099	0.000656025	0.00491118
Ddx24	32239	ENSMUSG00000041645	-0.42843	7.64835	11.6025	0.000658649	0.00492752
Rab10os	31373	ENSMUSG00000079179	-0.408899	4.33384	11.5973	0.00066046	0.00493776
1110038B12Rik	35828	ENSMUSG00000092203	-0.353451	6.71718	11.5613	0.000673384	0.00503103
Dancr	13560	ENSMUSG00000053656	-0.468782	3.5509	11.4857	0.00070134	0.00522592
Cyp51	12871	ENSMUSG00000001467	-0.379369	6.12967	11.4721	0.000706472	0.00526065
Acvrl1	33798	ENSMUSG00000000530	-0.392458	4.93125	11.4585	0.000711662	0.00529225
Prdx5	38083	ENSMUSG00000024953	-0.396423	6.35154	11.4357	0.000720453	0.0053505
Bcorl1	6352	ENSMUSG00000036959	-0.49427	3.7075	11.4002	0.000734361	0.00542496
Rgs1	1391	ENSMUSG00000026358	-0.761289	1.98693	11.3711	0.000745965	0.00550514
Zbed5	14428	ENSMUSG00000034173	-0.577571	2.80285	11.3705	0.000746201	0.00550514
Hip1r	14352	ENSMUSG00000000915	-0.718368	1.94321	11.3024	0.000774081	0.00569954
Rps5	17232	ENSMUSG00000012848	-0.288536	9.54006	11.2852	0.000781271	0.00573736
Rps28	35723	ENSMUSG00000067288	-0.328132	8.01343	11.2732	0.000786349	0.00576707
Fzd5	586	ENSMUSG00000045005	-0.692753	1.85668	11.2427	0.000799383	0.00585115
Angptl4	35720	ENSMUSG00000002289	-0.760564	3.34427	11.2206	0.000808935	0.00590733
Ndel1	28197	ENSMUSG00000018736	-0.374163	5.69153	11.2109	0.000813185	0.00592501
Gm4735	3423	ENSMUSG00000064193	-0.311742	7.86259	11.1848	0.000824722	0.00600125
Ube2e2	23683	ENSMUSG00000058317	-0.416319	3.93085	11.1471	0.000841636	0.00611636
Prr3	35934	ENSMUSG00000038500	-0.376455	4.65407	11.1244	0.000851989	0.00617955
Tefm	28671	ENSMUSG00000046909	-0.489403	3.4374	11.0859	0.000869857	0.00628754
Fndc3a	24853	ENSMUSG00000033487	-0.487859	5.92218	11.086	0.000869824	0.00628754
Mybbp1a	28394	ENSMUSG00000040463	-0.253515	9.44609	11.0851	0.000870254	0.00628754
Gucy2g	38815	ENSMUSG00000055523	-1.25387	0.253772	11.0784	0.000873376	0.00630602
Ppp1r11	36015	ENSMUSG00000036398	-0.349159	6.25115	11.0728	0.000876019	0.00632102
A530040E14Rik	807	ENSMUSG00000072109	-1.49199	1.27437	11.046	0.000888807	0.00640433
H2-Q4	35887	ENSMUSG00000035929	-0.364638	5.57987	11.0463	0.000888625	0.00640433
Cfl1	38002	ENSMUSG00000056201	-0.273555	10.8134	11.0438	0.000889857	0.00640434
Tnfsf9	36391	ENSMUSG00000035678	-0.434196	4.87705	11.018	0.000902317	0.00648566
Tmco5	4208	ENSMUSG00000027355	-0.967305	0.397534	10.9678	0.000927081	0.00662531
Asb6	2692	ENSMUSG00000039483	-0.375893	5.48539	10.9684	0.0009268	0.00662531
Pofut2	20843	ENSMUSG00000020260	-0.338166	6.63653	10.966	0.000927998	0.00662763
Elp5	28289	ENSMUSG00000018565	-0.374064	6.00325	10.9543	0.00093389	0.00666119
Tlr1	13453	ENSMUSG00000044827	-0.453048	3.73193	10.951	0.000935528	0.00666862
Pfn1	28337	ENSMUSG00000018293	-0.266003	10.6037	10.939	0.000941604	0.00670338
Cd300lb	29641	ENSMUSG00000063193	-0.267764	8.61855	10.9226	0.000949961	0.00675857
Zbtb17	12396	ENSMUSG00000006215	-0.355681	5.46031	10.898	0.000962673	0.00683908
1700109H08Rik	12859	ENSMUSG00000008307	-0.771703	1.39051	10.8784	0.000972947	0.00689577
Rps6ka1	12154	ENSMUSG00000003644	-0.271649	8.16144	10.8762	0.000974097	0.00689955
Eef1e1	30499	ENSMUSG00000001707	-0.340383	6.57613	10.8355	0.000995721	0.00703488
Aebp2	16778	ENSMUSG00000030232	-0.313767	7.68664	10.8198	0.00100419	0.00708574
Notch2	9352	ENSMUSG00000027878	-0.479481	7.03607	10.7862	0.00102259	0.00720195
Tmem176b	15436	ENSMUSG00000029810	-0.378978	5.55822	10.7825	0.00102462	0.00720885
Eif1a	37526	ENSMUSG00000057561	-0.285873	7.43104	10.7821	0.00102486	0.00720885
Dhps	22730	ENSMUSG00000060038	-0.366372	5.5134	10.7548	0.00104008	0.00729296
Ptpn12	12995	ENSMUSG00000028771	-0.34623	6.14584	10.7403	0.0010483	0.00734596
Gm16028	812	ENSMUSG00000090252	-1.16631	1.72519	10.739	0.00104899	0.00734622
Abhd1	13166	ENSMUSG00000006638	-1.13962	-0.0550653	10.7191	0.00106036	0.00741188
Lgals4	17811	ENSMUSG00000053964	-1.01075	0.454925	10.7128	0.00106399	0.00741871
Cldn25	34696	ENSMUSG00000022744	-0.378094	5.21003	10.7026	0.00106986	0.007455
G530011O06Rik	8283	ENSMUSG00000072844	-1.17154	0.455515	10.6984	0.00107231	0.00746742
Gm20204	23172	ENSMUSG00000098148	-0.372434	5.08144	10.6657	0.00109141	0.00758627
Rps26	21605	ENSMUSG00000025362	-0.260926	9.49651	10.6644	0.00109219	0.00758696
Rps19	17659	ENSMUSG00000040952	-0.25922	8.89558	10.6337	0.00111048	0.00769487
Ryr1	17817	ENSMUSG00000030592	-0.500269	3.11402	10.5998	0.001131	0.00780804
Rab12	36450	ENSMUSG00000023460	-0.380343	5.55233	10.5817	0.00114213	0.00786544
Hsd17b12	3912	ENSMUSG00000027195	-0.276626	7.53634	10.5735	0.00114723	0.00789568
Eaf1	23858	ENSMUSG00000021890	-0.322652	7.09737	10.5668	0.00115136	0.00791921
2810039B14Rik	33210	ENSMUSG00000099034	-0.890511	1.04226	10.5638	0.00115322	0.0079223
Hilpda	15076	ENSMUSG00000043421	-0.592394	3.26802	10.5602	0.00115546	0.00792793
Gm15879	33930	ENSMUSG00000084790	-0.872956	0.798359	10.5342	0.00117185	0.00803545
Frmd4a	2050	ENSMUSG00000026657	-0.368593	5.45318	10.4946	0.00119722	0.00819632
Ube2s	17000	ENSMUSG00000060860	-0.251886	8.57371	10.4888	0.00120102	0.00821029
Ubtd2	27454	ENSMUSG00000044949	-0.796883	1.99762	10.487	0.00120216	0.00821305
Rap2c	6389	ENSMUSG00000050029	-0.351732	5.98811	10.4552	0.00122303	0.0083251
Slirp	32104	ENSMUSG00000021040	-0.403829	4.65163	10.4248	0.00124336	0.00843779
Tor1aip2	1480	ENSMUSG00000050565	-0.469772	7.10967	10.4018	0.00125891	0.00853814
AA414768	5919	ENSMUSG00000083307	-0.396312	4.00706	10.3991	0.00126074	0.00854016
Ttyh2	29633	ENSMUSG00000034714	-0.396871	4.80281	10.3805	0.00127356	0.00862178
Dclre1c	2036	ENSMUSG00000026648	-0.419209	4.49422	10.3787	0.0012748	0.00862496
P4ha1	20634	ENSMUSG00000019916	-0.306134	6.99947	10.329	0.00130953	0.00883852
Dpp7	2482	ENSMUSG00000026958	-0.369238	5.03048	10.327	0.00131101	0.00884318
Ddah2	35845	ENSMUSG00000007039	-0.726198	1.65307	10.3235	0.00131347	0.00885443
Tbc1d1	13445	ENSMUSG00000029174	-0.352126	5.9624	10.3125	0.00132135	0.00890217
Shisa5	26724	ENSMUSG00000025647	-0.40143	7.1597	10.3021	0.00132877	0.00894137
Gm11127	35943	ENSMUSG00000079492	-0.480844	4.8938	10.2901	0.00133745	0.00898357
Brd2	35757	ENSMUSG00000024335	-0.245232	8.70434	10.276	0.00134771	0.00904163
Armc7	29673	ENSMUSG00000057219	-0.386484	4.71069	10.2608	0.00135888	0.00911111
Sec11c	37698	ENSMUSG00000024516	-0.303737	7.28683	10.2549	0.00136321	0.00911822
Trim56	14549	ENSMUSG00000043279	-0.426294	5.98724	10.2483	0.00136813	0.00914569
Noc4l	14031	ENSMUSG00000033294	-0.350353	6.78267	10.2245	0.00138585	0.00924752
Plekhf1	18052	ENSMUSG00000074170	-1.03497	1.6034	10.2174	0.00139122	0.00927784
Map2k1	26053	ENSMUSG00000004936	-0.343402	6.99995	10.1812	0.00141884	0.00945073
Snora78	35415	ENSMUSG00000089255	-0.949634	0.30687	10.1751	0.00142351	0.00947622
Ccnj	38613	ENSMUSG00000025010	-0.407532	4.07094	10.1691	0.00142813	0.00949
Anxa4	16000	ENSMUSG00000029994	-0.345732	6.57849	10.1	0.00148272	0.00980474
Rab8b	26113	ENSMUSG00000036943	-0.326125	6.66766	10.0813	0.00149779	0.00988826
Ifit2	38528	ENSMUSG00000045932	-2.03707	5.18117	10.0727	0.00150485	0.00991144
Vps37c	38210	ENSMUSG00000048832	-0.399162	5.05018	10.0729	0.00150464	0.00991144
Lztfl1	26972	ENSMUSG00000025245	-0.403051	3.93149	10.063	0.00151278	0.00993638
Mvp	19751	ENSMUSG00000030681	-0.366192	6.23169	10.0491	0.0015242	0.00999762
Atp6v0a1	29296	ENSMUSG00000019302	-0.391617	5.17406	10.0317	0.00153866	0.0100806
Gas5	1527	ENSMUSG00000053332	-0.273958	8.35374	10.0188	0.00154949	0.0101457
Dtwd1	4414	ENSMUSG00000023330	-0.391937	4.2449	10.0154	0.00155236	0.0101585
Anxa1	38380	ENSMUSG00000024659	-0.253455	7.89127	9.96836	0.00159254	0.0103971
Gm17300	12094	ENSMUSG00000091021	-0.489196	3.07817	9.961	0.00159891	0.0104265
Elac2	28138	ENSMUSG00000020549	-0.316756	6.65821	9.9613	0.00159865	0.0104265
Ipo5	25094	ENSMUSG00000030662	-0.240982	8.78338	9.94998	0.00160851	0.0104708
Clec4d	16431	ENSMUSG00000030144	-0.250933	8.52165	9.94173	0.00161573	0.0105117
Ptpn7	1294	ENSMUSG00000031506	-0.296704	7.37774	9.93722	0.0016197	0.0105313
Stambpl1	38520	ENSMUSG00000024776	-0.358109	5.7262	9.93505	0.00162161	0.0105377
Urb1	34906	ENSMUSG00000039929	-0.346137	5.44841	9.927	0.00162871	0.0105777
Tmem120a	14506	ENSMUSG00000039886	-0.388716	4.57459	9.90536	0.00164798	0.0106779
Matk	21040	ENSMUSG00000004933	-0.869341	0.885632	9.8925	0.00165954	0.0107342
Rps29	31816	ENSMUSG00000034892	-0.284181	8.45994	9.88737	0.00166417	0.0107579
Anxa5	8516	ENSMUSG00000027712	-0.254576	9.59473	9.8837	0.00166749	0.0107732
Gm22	23263	ENSMUSG00000043903	-0.803609	1.98357	9.86444	0.00168504	0.0108614
Mbnl2	25089	ENSMUSG00000022139	-0.316295	6.8209	9.83793	0.0017095	0.0110064
Ifi47	27651	ENSMUSG00000078920	-1.60366	2.75721	9.80996	0.0017357	0.0111558
Pydc4	1778	ENSMUSG00000073491	-0.766419	3.92623	9.81038	0.0017353	0.0111558
Sh3tc1	13277	ENSMUSG00000036553	-0.353087	5.95461	9.80525	0.00174014	0.0111779
D17H6S53E	35857	ENSMUSG00000043311	-0.425488	4.13475	9.77336	0.00177058	0.0113356
Hk2	15890	ENSMUSG00000000628	-0.302755	6.69308	9.75344	0.00178987	0.0114317
Pla2g6	33365	ENSMUSG00000042632	-0.382077	4.28139	9.74358	0.0017995	0.0114866
Mitf	16159	ENSMUSG00000035158	-0.426107	6.64417	9.73435	0.00180856	0.0115378
Pmepa1	5441	ENSMUSG00000038400	-0.268688	7.62965	9.72319	0.00181958	0.0115949
Pigv	12150	ENSMUSG00000043257	-0.515206	3.59382	9.70901	0.00183367	0.0116723
Dusp4	22160	ENSMUSG00000031530	-0.388359	6.23132	9.70483	0.00183784	0.0116806
Mapk6	26242	ENSMUSG00000042688	-0.261177	8.42082	9.66898	0.00187405	0.0118743
Slc6a12	16389	ENSMUSG00000030109	-0.26385	8.12509	9.60276	0.00194285	0.0122616
4933423P22Rik	3814	ENSMUSG00000085471	-0.948166	0.32372	9.59504	0.00195104	0.0122994
Acot9	8092	ENSMUSG00000025287	-0.340729	5.47961	9.59226	0.001954	0.0123041
Deb1	26923	ENSMUSG00000032526	-0.432961	3.45626	9.57774	0.00196951	0.0123809
Sra1	37381	ENSMUSG00000006050	-0.339897	5.63434	9.54859	0.00200103	0.0125508
Ssr2	8984	ENSMUSG00000041355	-0.259061	8.30062	9.53618	0.00201461	0.0126147
Etf1	37346	ENSMUSG00000024360	-0.240628	8.70696	9.52595	0.00202587	0.0126639
Ppap2c	20915	ENSMUSG00000052151	-0.431915	4.92739	9.50232	0.00205212	0.0128209
null	35838	ENSMUSG00000091747	-0.26052	8.19157	9.4939	0.00206157	0.0128655
Rpl27	29332	ENSMUSG00000063316	-0.259746	9.11122	9.48061	0.00207655	0.0129374
Pold4	37939	ENSMUSG00000024854	-0.393734	4.12723	9.47823	0.00207924	0.0129469
Airn	35121	ENSMUSG00000078247	-0.914096	1.06937	9.46648	0.0020926	0.0130084
Tomm20	23418	ENSMUSG00000093904	-0.284704	7.19471	9.46108	0.00209877	0.0130342
Ldlr	25369	ENSMUSG00000032193	-0.457259	7.06836	9.44766	0.00211419	0.0131207
Qtrt1	25356	ENSMUSG00000002825	-0.357573	5.22198	9.44123	0.00212161	0.0131594
Cldn12	12879	ENSMUSG00000046798	-0.584493	2.62576	9.43116	0.00213329	0.0132025
Itgal	19773	ENSMUSG00000030830	-0.363108	5.13733	9.42093	0.00214523	0.0132544
Lyn	10003	ENSMUSG00000042228	-0.322822	7.30498	9.41063	0.00215731	0.0133143
Setd4	34962	ENSMUSG00000022948	-0.52421	3.10208	9.39803	0.00217219	0.013384
Plbd2	14241	ENSMUSG00000029598	-0.317072	6.42951	9.36161	0.00221578	0.01363
Pik3r6	28192	ENSMUSG00000046207	-0.459417	3.87408	9.34154	0.00224017	0.0137574
Rapgef1	2640	ENSMUSG00000039844	-0.272252	7.27983	9.29667	0.00229571	0.0140675
Slc7a8	24509	ENSMUSG00000022180	-0.468134	4.78662	9.27064	0.00232856	0.0142298
1700034P13Rik	48	ENSMUSG00000097893	-0.898702	0.76724	9.23459	0.00237485	0.0144652
N4bp1	22761	ENSMUSG00000031652	-0.452738	6.54394	9.22228	0.00239088	0.014547
Slc52a2	33264	ENSMUSG00000022560	-0.350606	5.62239	9.21829	0.0023961	0.0145708
Pik3ap1	38622	ENSMUSG00000025017	-0.330152	6.06701	9.19978	0.00242044	0.0146869
Ppa1	20678	ENSMUSG00000020089	-0.270563	7.45415	9.18367	0.00244184	0.0148007
Pard6b	5358	ENSMUSG00000044641	-0.501805	3.06709	9.18103	0.00244536	0.014814
Map3k11	38012	ENSMUSG00000004054	-0.32682	6.25676	9.17917	0.00244784	0.014821
P2ry2	19128	ENSMUSG00000032860	-0.691226	1.79923	9.17456	0.00245402	0.0148469
Snhg12	12086	ENSMUSG00000086290	-0.379956	4.91858	9.17342	0.00245556	0.0148469
Pdlim5	9843	ENSMUSG00000028273	-0.346139	5.40115	9.17301	0.00245611	0.0148469
Cd74	37629	ENSMUSG00000024610	-0.279767	7.77599	9.16889	0.00246164	0.0148723
Zcchc2	1056	ENSMUSG00000038866	-0.426169	6.22973	9.16416	0.00246801	0.0149027
Areg	13720	ENSMUSG00000029378	-1.25268	0.940922	9.1514	0.00248528	0.0149989
Pkd1l2	23167	ENSMUSG00000034416	-0.405148	4.2762	9.14851	0.00248921	0.0150145
Sp140	823	ENSMUSG00000070031	-0.895772	4.17592	9.13868	0.00250261	0.0150872
Lacc1	24899	ENSMUSG00000044350	-0.937073	1.26742	9.11217	0.00253914	0.0152909
Kdm5b	1285	ENSMUSG00000042207	-0.804514	1.69747	9.09528	0.00256269	0.0154245
Crtc2	9068	ENSMUSG00000027936	-0.309862	6.49947	9.08661	0.00257487	0.0154728
Ero1l	24122	ENSMUSG00000021831	-0.281152	7.04311	9.06866	0.00260028	0.0156036
Rps20	10008	ENSMUSG00000028234	-0.231311	9.03576	9.06826	0.00260084	0.0156036
Ksr1	28640	ENSMUSG00000018334	-0.983762	0.297032	9.0569	0.00261706	0.0156841
Atf4	33403	ENSMUSG00000042406	-0.24276	8.04377	9.05224	0.00262373	0.0157073
Rnf31	24548	ENSMUSG00000047098	-0.505341	4.92405	9.03086	0.00265459	0.0158835
Ubc	14386	ENSMUSG00000008348	-0.331601	6.84603	9.0041	0.00269374	0.0160919
Znrf3	27077	ENSMUSG00000041961	-0.368112	4.50825	8.99865	0.00270179	0.0161228
Gm15541	17753	ENSMUSG00000087371	-0.673392	2.10999	8.98069	0.00272848	0.0162538
Sec61a1	16038	ENSMUSG00000030082	-0.23855	8.4138	8.97801	0.00273248	0.0162538
Gspt1	34034	ENSMUSG00000062203	-0.235215	8.60032	8.97872	0.00273142	0.0162538
Rpl18a	22487	ENSMUSG00000045128	-0.239455	10.2435	8.97505	0.00273691	0.0162715
Trim26	36007	ENSMUSG00000024457	-0.470283	6.35075	8.898	0.00285484	0.0168828
Kansl1l	614	ENSMUSG00000026004	-0.374399	3.90567	8.86925	0.00290014	0.0171416
Arhgef12	25691	ENSMUSG00000059495	-0.381075	3.882	8.84352	0.00294132	0.0173667
Pex11a	18794	ENSMUSG00000030545	-0.490569	2.85309	8.83377	0.00295707	0.0174321
Med29	17789	ENSMUSG00000003444	-0.362495	4.83849	8.82534	0.00297075	0.0174943
H2-T22	35941	ENSMUSG00000056116	-0.788734	3.61928	8.80865	0.00299806	0.0176365
Smndc1	38799	ENSMUSG00000025024	-0.307116	6.43855	8.80523	0.00300368	0.0176603
Gm16754	25346	ENSMUSG00000097439	-0.758259	1.67238	8.79643	0.00301821	0.0177363
Leprotl1	22153	ENSMUSG00000031513	-0.320869	5.8938	8.77935	0.0030466	0.0178844
Kcnc3	18215	ENSMUSG00000062785	-0.38292	4.43082	8.77049	0.00306144	0.0179351
Naa25	14269	ENSMUSG00000042719	-0.352518	6.67932	8.73585	0.00312015	0.0182586
Psmb4	9207	ENSMUSG00000005779	-0.258322	7.81541	8.71971	0.00314787	0.0184112
Rpl10a	35569	ENSMUSG00000037805	-0.231325	9.49818	8.7161	0.00315412	0.0184381
4933426M11Rik	31970	ENSMUSG00000021133	-0.360708	5.78894	8.70919	0.00316609	0.0184887
Myo1g	27121	ENSMUSG00000020437	-0.32905	5.97198	8.70147	0.00317953	0.0185478
Chchd2	14427	ENSMUSG00000070493	-0.299879	6.80729	8.69844	0.00318482	0.018569
Rasa4	14521	ENSMUSG00000004952	-0.325585	6.64637	8.66155	0.00324994	0.0188994
Atox1	27858	ENSMUSG00000018585	-0.323869	5.33068	8.65985	0.00325298	0.0189072
Tiparp	8763	ENSMUSG00000034640	-0.473437	4.61439	8.65506	0.00326154	0.0189471
Sgtb	31223	ENSMUSG00000042743	-0.583989	2.26505	8.64842	0.00327345	0.0190064
Rps16	17785	ENSMUSG00000037563	-0.247144	9.25756	8.64306	0.0032831	0.0190427
Ppp4r2	16180	ENSMUSG00000052144	-0.276969	7.03016	8.63507	0.00329752	0.0191164
1700019L03Rik	2771	ENSMUSG00000038987	-0.833044	0.481662	8.59311	0.00337438	0.0195279
Ncor2	14384	ENSMUSG00000029478	-0.234852	7.86279	8.59251	0.00337549	0.0195279
Hmgxb3	37641	ENSMUSG00000024622	-0.334346	5.19051	8.589	0.003382	0.0195537
Tnnt2	1316	ENSMUSG00000026414	-0.769568	1.5366	8.56697	0.00342317	0.0197526
Msn	7122	ENSMUSG00000031207	-0.228478	9.28634	8.54562	0.00346354	0.019965
Ndrg1	33135	ENSMUSG00000005125	-0.345561	4.8404	8.53406	0.00348561	0.0200715
Socs7	29081	ENSMUSG00000038485	-0.323202	5.03211	8.52077	0.00351116	0.0202082
Prkcsh	25383	ENSMUSG00000003402	-0.274577	7.43614	8.5191	0.00351438	0.0202163
Mcts2	4922	ENSMUSG00000042814	-0.537746	2.47487	8.5061	0.00353958	0.0203507
Sppl2a	4429	ENSMUSG00000027366	-0.33494	6.58268	8.48966	0.00357171	0.0205039
5430427O19Rik	6980	ENSMUSG00000025058	-0.35241	4.84168	8.48787	0.00357523	0.0205135
Eftud1	18863	ENSMUSG00000038563	-0.314312	5.49539	8.47902	0.00359265	0.0205987
Nip7	23040	ENSMUSG00000031917	-0.309235	6.60306	8.47032	0.00360988	0.0206487
Homer1	31092	ENSMUSG00000007617	-0.346472	4.33347	8.4397	0.00367117	0.0209564
Rgs3	10909	ENSMUSG00000059810	-0.35489	4.8691	8.37377	0.00380675	0.021587
Zglp1	25338	ENSMUSG00000079681	-0.783872	0.875188	8.34772	0.00386172	0.0218655
Plekha5	16776	ENSMUSG00000030231	-0.370032	4.14888	8.33945	0.00387934	0.0219541
Ifngr2	34931	ENSMUSG00000022965	-0.255038	7.49236	8.30286	0.00395827	0.0222992
Klhl12	1280	ENSMUSG00000026455	-0.418197	3.33124	8.27418	0.00402128	0.0225851
H2-Q2	35884	ENSMUSG00000091705	-0.554017	2.83862	8.26255	0.00404713	0.0227082
Tnfrsf4	12828	ENSMUSG00000029075	-0.76628	0.923935	8.25868	0.00405577	0.0227453
Slc20a1	4495	ENSMUSG00000027397	-0.322329	6.30192	8.25634	0.00406098	0.0227631
Srebf2	33453	ENSMUSG00000022463	-0.294858	7.4444	8.23937	0.00409914	0.0229491
Crlf2	13997	ENSMUSG00000033467	-0.51484	2.46844	8.22869	0.00412334	0.0230159
Tifab	30719	ENSMUSG00000049625	-0.361364	4.11764	8.19949	0.00419022	0.0233354
Plscr1	26438	ENSMUSG00000032369	-0.485439	2.73379	8.16037	0.00428156	0.0237966
Rpl7l1	36232	ENSMUSG00000063888	-0.22965	7.79751	8.1518	0.00430185	0.0238856
Cox17	34517	ENSMUSG00000046516	-0.452713	3.11241	8.10088	0.00442437	0.0244324
Slc45a3	1220	ENSMUSG00000026435	-0.611134	2.67349	8.09922	0.00442842	0.0244427
9930022D16Rik	29575	ENSMUSG00000045065	-0.805578	0.75464	8.09678	0.00443439	0.0244515
Csnk2a2	22884	ENSMUSG00000046707	-0.289768	6.40027	8.08023	0.00447507	0.0246636
Baiap2	29836	ENSMUSG00000025372	-0.50964	5.58373	8.07741	0.00448205	0.0246899
Mif	20805	ENSMUSG00000033307	-0.239622	9.06007	8.0687	0.00450364	0.0247967
Slc19a1	20840	ENSMUSG00000001436	-0.266896	7.02881	8.05198	0.0045454	0.025002
Lsp1	20068	ENSMUSG00000018819	-0.271103	6.86558	8.02138	0.00462283	0.0253903
Rpl18	18306	ENSMUSG00000059070	-0.218477	9.60546	8.00488	0.00466515	0.0256102
Sh3pxd2b	27453	ENSMUSG00000040711	-0.301753	6.43569	7.98386	0.00471961	0.0258838
Nfe2l1	29049	ENSMUSG00000038615	-0.245088	7.43896	7.96027	0.00478152	0.0261591
Cd9	16521	ENSMUSG00000030342	-0.289151	8.92786	7.95732	0.00478933	0.0261786
Psme3	29319	ENSMUSG00000078652	-0.221181	8.42229	7.94456	0.00482323	0.0263357
Prosc	22099	ENSMUSG00000031485	-0.304939	5.66284	7.94281	0.00482787	0.0263482
Sass6	9628	ENSMUSG00000027959	-0.513241	6.401	7.92615	0.00487255	0.0265531
Eml2	17445	ENSMUSG00000040811	-0.330805	5.18039	7.87871	0.00500201	0.027187
Lgals8	30005	ENSMUSG00000057554	-0.465616	6.17457	7.86572	0.00503809	0.0273486
Ccnl1	8767	ENSMUSG00000027829	-0.277691	6.6537	7.8581	0.00505935	0.0274506
Zbtb21	35018	ENSMUSG00000046962	-0.333691	4.80356	7.85226	0.00507571	0.0275002
Isca2	32042	ENSMUSG00000021241	-0.33706	4.59068	7.84442	0.00509778	0.0275922
Pbld1	20716	ENSMUSG00000020072	-0.829701	0.701317	7.82562	0.00515108	0.0278672
Cox18	13700	ENSMUSG00000035505	-0.350855	5.11911	7.82267	0.0051595	0.0278857
Degs1	1895	ENSMUSG00000038633	-0.260247	7.39406	7.79344	0.00524362	0.0282584
Eif4e	9828	ENSMUSG00000028156	-0.218925	8.02504	7.79352	0.0052434	0.0282584
Ndufa12	21240	ENSMUSG00000020022	-0.315359	6.54536	7.79176	0.00524851	0.0282711
Cops8	928	ENSMUSG00000034432	-0.297326	6.21582	7.78375	0.00527181	0.0283693
2410006H16Rik	28094	ENSMUSG00000086841	-0.343427	5.09988	7.76907	0.00531485	0.0285322
Cers6	3211	ENSMUSG00000027035	-0.284342	6.79072	7.7642	0.00532919	0.0285955
Arg1	20365	ENSMUSG00000019987	-0.805968	0.826759	7.75877	0.00534522	0.0286677
Dnajb4	9920	ENSMUSG00000028035	-0.375136	3.91335	7.75403	0.00535927	0.0287201
Zfp408	3852	ENSMUSG00000075040	-0.330136	4.34179	7.69067	0.0055507	0.0296276
Cyba	23269	ENSMUSG00000006519	-0.229167	7.79085	7.67111	0.0056112	0.0298792
Spsb1	12675	ENSMUSG00000039911	-0.538166	2.28473	7.6613	0.0056418	0.0300135
Slc7a7	24488	ENSMUSG00000000958	-0.558732	3.30377	7.64885	0.00568086	0.0301926
Fgd6	21237	ENSMUSG00000020021	-0.36055	5.47674	7.62527	0.00575562	0.0305308
Zcchc10	27782	ENSMUSG00000018239	-0.335111	4.72803	7.61141	0.00580002	0.0307382
Pex26	16383	ENSMUSG00000067825	-0.433021	3.24124	7.60702	0.00581416	0.0307985
Tes	14974	ENSMUSG00000029552	-0.284763	6.66313	7.59516	0.00585251	0.030987
Plekhn1	12843	ENSMUSG00000078485	-0.537851	4.60315	7.58958	0.00587067	0.0310684
Aqp9	26162	ENSMUSG00000032204	-0.899285	0.805553	7.58847	0.00587426	0.0310727
5730508B09Rik	9729	ENSMUSG00000050549	-0.383561	3.54632	7.57976	0.00590273	0.0311643
Slc6a13	16387	ENSMUSG00000030108	-0.319349	5.07599	7.57398	0.00592168	0.0312496
Pex12	28737	ENSMUSG00000018733	-0.325626	4.36112	7.50596	0.00614951	0.0322842
C130026I21Rik	800	ENSMUSG00000052477	-0.579178	4.95416	7.50005	0.00616972	0.0323447
Slc9a3r2	35405	ENSMUSG00000002504	-0.734829	2.55275	7.49712	0.00617977	0.0323822
Rab3gap1	1164	ENSMUSG00000036104	-0.298464	5.54294	7.48752	0.00621281	0.032507
Il10	1200	ENSMUSG00000016529	-0.741824	1.0538	7.47923	0.00624147	0.0326288
Ddit3	21524	ENSMUSG00000025408	-0.440138	2.93777	7.46113	0.00630453	0.0328972
Pisd	13213	ENSMUSG00000023452	-0.304923	4.88885	7.44771	0.00635173	0.0331125
Camk2d	9711	ENSMUSG00000053819	-0.365074	4.85193	7.44466	0.0063625	0.0331532
Gdpd5	19082	ENSMUSG00000035314	-0.335595	4.97578	7.44012	0.00637857	0.033206
Gm13394	2627	ENSMUSG00000083773	-0.226097	9.39512	7.43472	0.00639772	0.0332902
App	34833	ENSMUSG00000022892	-0.214293	7.96478	7.4306	0.0064124	0.0333355
Bet1l	19982	ENSMUSG00000025484	-0.405373	3.83791	7.41503	0.00646812	0.033594
Wdr46	35737	ENSMUSG00000024312	-0.295429	6.77057	7.38221	0.00658721	0.0341016
Fam107b	2044	ENSMUSG00000026655	-0.326467	4.65009	7.37237	0.00662336	0.0342434
Hspa8	25667	ENSMUSG00000015656	-0.229408	11.1535	7.36028	0.00666804	0.0343925
Acp5	25391	ENSMUSG00000001348	-0.713034	1.84356	7.35142	0.00670097	0.0345372
Atp6v0b	11689	ENSMUSG00000033379	-0.232009	7.60061	7.3374	0.00675343	0.0347627
Bop1	33258	ENSMUSG00000022557	-0.261493	7.58029	7.31501	0.00683811	0.0350916
Rpl13	23293	ENSMUSG00000000740	-0.21438	9.93866	7.31394	0.00684217	0.0350963
Zfp575	17644	ENSMUSG00000066721	-0.726105	0.934589	7.3006	0.00689315	0.0353416
Epsti1	24908	ENSMUSG00000022014	-0.772367	4.05152	7.29648	0.00690897	0.0354065
Prkx	6903	ENSMUSG00000035725	-0.309301	4.7855	7.29278	0.00692322	0.0354633
Bahcc1	29848	ENSMUSG00000039741	-0.316864	5.27888	7.28212	0.00696443	0.035658
Mob1b	13689	ENSMUSG00000006262	-0.292668	5.84745	7.27799	0.00698047	0.0357238
Cadps	23646	ENSMUSG00000054423	-0.425972	3.30234	7.27603	0.00698807	0.03573
Gm10039	29268	ENSMUSG00000091478	-0.318537	4.91897	7.24276	0.00711873	0.0362653
Stac2	29118	ENSMUSG00000017400	-0.653676	2.18589	7.24149	0.00712378	0.0362745
Atp6v1f	15085	ENSMUSG00000004285	-0.296078	5.9444	7.23601	0.00714556	0.0363522
Ercc6	23881	ENSMUSG00000054051	-0.293683	5.49432	7.23606	0.00714538	0.0363522
Hmx2	19868	ENSMUSG00000050100	-0.347487	4.21029	7.2201	0.00720915	0.0366258
Prkcg	16925	ENSMUSG00000078816	-0.337764	3.9689	7.21067	0.00724714	0.036802
A430104N18Rik	28860	ENSMUSG00000084796	-0.380921	3.77837	7.20551	0.00726801	0.0368745
Spire1	37722	ENSMUSG00000024533	-0.341636	5.94216	7.20273	0.00727929	0.0368982
Tubb2b	30463	ENSMUSG00000045136	-0.907241	0.169313	7.18094	0.00736822	0.0373152
Dedd	1707	ENSMUSG00000013973	-0.417497	3.06129	7.16993	0.00741357	0.0375109
Atp6v0c	35376	ENSMUSG00000024121	-0.294056	5.42621	7.14927	0.00749944	0.0378255
Mapkbp1	4289	ENSMUSG00000033902	-0.319354	4.59034	7.14602	0.00751306	0.037877
Tcta	26685	ENSMUSG00000039461	-0.465143	2.56776	7.14268	0.00752707	0.0379306
Tcof1	37631	ENSMUSG00000024613	-0.256717	8.54921	7.14127	0.00753298	0.0379433
Arfrp1	5644	ENSMUSG00000038671	-0.292984	5.41353	7.10943	0.00766794	0.0385362
Gar1	9741	ENSMUSG00000028010	-0.268402	6.70299	7.07727	0.00780681	0.039151
Adarb1	20844	ENSMUSG00000020262	-0.32653	4.4513	7.06459	0.00786222	0.0393181
Acap1	28280	ENSMUSG00000001588	-0.640784	1.86148	7.06366	0.00786632	0.039321
Wdr77	9486	ENSMUSG00000000561	-0.221377	7.74514	7.06166	0.00787512	0.0393474
Nek6	2915	ENSMUSG00000026749	-0.306864	5.84992	7.04991	0.00792692	0.0395709
Pnp	24230	ENSMUSG00000021871	-0.499886	6.15348	7.03885	0.00797602	0.0397336
Rbm18	2844	ENSMUSG00000026889	-0.318846	4.59699	7.03803	0.00797966	0.0397336
Myl12a	36478	ENSMUSG00000024048	-0.217334	8.14962	7.03252	0.00800426	0.0398147
Nhp2l1	33449	ENSMUSG00000063480	-0.220552	7.77045	7.02424	0.00804136	0.0399447
Psmc4	17772	ENSMUSG00000030603	-0.233377	7.50764	7.01019	0.00810472	0.0402046
Gm9843	34796	ENSMUSG00000050299	-0.504158	4.92122	6.98995	0.00819686	0.0405921
Ctxn1	21751	ENSMUSG00000048644	-0.748385	0.524062	6.98802	0.00820573	0.040618
Zfp593	12173	ENSMUSG00000028840	-0.77324	0.779611	6.98159	0.00823526	0.0407461
Ptpn22	9453	ENSMUSG00000027843	-0.221903	7.766	6.97175	0.00828066	0.0408983
Zfp142	689	ENSMUSG00000026135	-0.297669	4.93042	6.94811	0.0083908	0.0413327
Usp47	19532	ENSMUSG00000059263	-0.279809	6.40486	6.9405	0.00842657	0.0414724
Uqcrq	27787	ENSMUSG00000044894	-0.285321	6.42769	6.92422	0.00850361	0.0417596
Adrm1	5592	ENSMUSG00000039041	-0.226313	7.52671	6.8999	0.00862006	0.0422757
Btg3	34808	ENSMUSG00000022863	-0.503339	2.28439	6.88855	0.00867495	0.042489
Rpl31	316	ENSMUSG00000073702	-0.212635	9.19401	6.88856	0.00867492	0.042489
Herc4	20720	ENSMUSG00000020064	-0.300121	6.19001	6.88201	0.00870678	0.0425961
Rad54l2	26615	ENSMUSG00000040661	-0.309849	5.57194	6.87242	0.0087536	0.0427805
Cmtr1	35622	ENSMUSG00000024019	-0.532451	2.17955	6.86685	0.00878095	0.0428767
Shq1	16176	ENSMUSG00000035378	-0.323153	4.05674	6.86378	0.00879604	0.0429002
Mmadhc	3009	ENSMUSG00000026766	-0.286691	5.88067	6.86275	0.00880111	0.0429002
Nop16	30666	ENSMUSG00000025869	-0.226165	7.54831	6.86437	0.00879312	0.0429002
Mlxip	14333	ENSMUSG00000038342	-0.277752	6.06204	6.83696	0.00892909	0.0434292
Esd	24871	ENSMUSG00000021996	-0.19674	9.49873	6.83769	0.00892541	0.0434292
Taf1c	23194	ENSMUSG00000031832	-0.310729	4.29552	6.82118	0.00900828	0.0437954
Parp12	15234	ENSMUSG00000038507	-0.571176	6.4256	6.81036	0.00906307	0.0439661
Dennd6b	33583	ENSMUSG00000015377	-0.41531	3.66884	6.80256	0.00910271	0.0441201
Fam53c	37341	ENSMUSG00000034300	-0.349958	5.53444	6.78737	0.00918048	0.0444393
Hivep2	20238	ENSMUSG00000015501	-0.311594	5.0705	6.7848	0.00919371	0.044484
Wdfy1	760	ENSMUSG00000073643	-0.319467	4.7793	6.779	0.00922367	0.0445988
Mrpl20	12812	ENSMUSG00000029066	-0.257612	6.62752	6.77866	0.0092254	0.0445988
Aig1	20235	ENSMUSG00000019806	-0.375237	3.64037	6.77279	0.0092558	0.0446973
Clpp	36379	ENSMUSG00000002660	-0.288093	5.63396	6.76356	0.00930381	0.0448807
Gnb2l1	27632	ENSMUSG00000020372	-0.202809	10.5359	6.75741	0.00933594	0.0449973
Gnl1	35935	ENSMUSG00000024429	-0.271155	6.38606	6.75512	0.0093479	0.0450157
Otud5	5788	ENSMUSG00000031154	-0.25724	6.63154	6.75149	0.00936695	0.0450686
Asns	14925	ENSMUSG00000029752	-0.214363	7.77562	6.71999	0.00953382	0.0458123
Rpl38	29632	ENSMUSG00000057322	-0.208229	7.84019	6.69537	0.00966634	0.0463098
Lipt1	294	ENSMUSG00000037216	-0.413566	2.94944	6.69128	0.00968857	0.0463964
Ppif	23766	ENSMUSG00000021868	-0.281305	6.00761	6.66647	0.00982434	0.046946
Mpdu1	28253	ENSMUSG00000018761	-0.29977	5.58888	6.65096	0.00991027	0.0473161
Psmb7	2916	ENSMUSG00000026750	-0.217114	7.59734	6.63444	0.0100025	0.0477363
Asb1	949	ENSMUSG00000026311	-0.343109	3.6489	6.60724	0.0101565	0.0483884
Ubr4	12335	ENSMUSG00000066036	-0.228662	7.76351	6.60249	0.0101836	0.0484433
Slc30a6	36516	ENSMUSG00000024069	-0.314553	4.39254	6.59129	0.0102479	0.0486428
Crlf3	28669	ENSMUSG00000017561	-0.273323	6.08451	6.59089	0.0102502	0.0486428
Herc6	15588	ENSMUSG00000029798	-0.937554	3.30871	6.58544	0.0102816	0.0487558
Fbxo36	797	ENSMUSG00000073633	-0.694596	0.994572	6.58192	0.010302	0.0488318
Dpf2	38032	ENSMUSG00000024826	-0.284201	6.53816	6.58055	0.0103099	0.0488486
Heatr2	14635	ENSMUSG00000025857	-0.297706	5.39425	6.57738	0.0103283	0.0488744
Pin1	25317	ENSMUSG00000032171	-0.269877	6.24255	6.57216	0.0103586	0.0489873
Tmem26	20747	ENSMUSG00000060044	-0.343346	7.0049	6.55301	0.0104707	0.0494398
Bcl9	9340	ENSMUSG00000038256	-0.263309	6.55787	6.53762	0.0105617	0.0497672
Ptrh1	2770	ENSMUSG00000053746	-0.495333	2.55422	6.53547	0.0105745	0.0497925
Tti2	22121	ENSMUSG00000031577	-0.304171	4.15525	6.53522	0.0105759	0.0497925
Gm8730	22919	ENSMUSG00000063696	-0.215959	9.01479	6.53422	0.0105819	0.0497994
Rasal2	1495	ENSMUSG00000070565	-0.331693	4.591	6.53147	0.0105982	0.0498553
Psmb10	23002	ENSMUSG00000031897	-0.35976	5.33168	6.51878	0.0106741	0.0501491
Cpeb4	27438	ENSMUSG00000020300	-0.31948	4.31891	6.51898	0.0106729	0.0501491
Eif3k	17815	ENSMUSG00000053565	-0.238274	7.5918	6.51289	0.0107096	0.0502522
Smg7	1442	ENSMUSG00000042772	-0.260579	7.12461	6.50713	0.0107443	0.0503728
Mapk8ip3	35428	ENSMUSG00000024163	-0.273124	5.92514	6.49721	0.0108044	0.0506123
Gm6206	7265	ENSMUSG00000048949	-0.413739	3.12565	6.48944	0.0108517	0.0508126
Bloc1s2	38683	ENSMUSG00000057506	-0.291912	5.05577	6.48633	0.0108707	0.0508803
Rps19-ps3	12598	ENSMUSG00000080059	-0.689687	1.13679	6.46734	0.0109875	0.0513623
Rps15	20974	ENSMUSG00000063457	-0.191715	9.7537	6.45723	0.0110502	0.0515779
Rpl15	23678	ENSMUSG00000012405	-0.192878	9.04141	6.45388	0.011071	0.0516447
Gabarapl1	16609	ENSMUSG00000030161	-0.292102	6.00656	6.42853	0.0112302	0.0522346
Npas1	17372	ENSMUSG00000001988	-0.873092	-0.108682	6.41328	0.011327	0.0526114
Csnk2b	35854	ENSMUSG00000024387	-0.237323	7.39354	6.4128	0.01133	0.0526114
Capg	15844	ENSMUSG00000056737	-0.20177	9.93793	6.39128	0.0114683	0.0531429
Ecm1	9255	ENSMUSG00000028108	-0.322637	4.43801	6.38254	0.0115249	0.0533389
Tmem161a	22445	ENSMUSG00000002342	-0.291486	5.23112	6.37857	0.0115507	0.0533537
Akt1s1	18225	ENSMUSG00000011096	-0.285584	5.92839	6.38015	0.0115403	0.0533537
Rps3	19084	ENSMUSG00000030744	-0.195345	10.3027	6.37567	0.0115695	0.0534129
Mxd1	15997	ENSMUSG00000001156	-0.884427	2.84477	6.3711	0.0115993	0.0535284
Psmc5	29501	ENSMUSG00000020708	-0.213287	7.67874	6.36894	0.0116135	0.0535495
H2-T10	35951	ENSMUSG00000079491	-0.850809	0.519962	6.36818	0.0116185	0.0535504
Rnf25	692	ENSMUSG00000026171	-0.291087	4.86554	6.3606	0.0116682	0.0537353
Tmcc1	16302	ENSMUSG00000030126	-0.312623	3.95938	6.35873	0.0116805	0.0537698
G6pc3	29373	ENSMUSG00000034793	-0.278443	5.61032	6.35179	0.0117263	0.0539364
Rassf8	16844	ENSMUSG00000030259	-0.46338	5.30152	6.34901	0.0117447	0.0539986
Mier2	20917	ENSMUSG00000042570	-0.301823	4.80741	6.34616	0.0117636	0.0540411
Grb2	29685	ENSMUSG00000059923	-0.219817	7.71313	6.32859	0.0118807	0.0544892
Kif17	12296	ENSMUSG00000028758	-0.877087	0.491696	6.32448	0.0119082	0.0545931
Pno1	27222	ENSMUSG00000020116	-0.261942	6.36494	6.30588	0.0120338	0.0550335
Atf5	18221	ENSMUSG00000038539	-0.33705	5.30388	6.29686	0.0120952	0.0552692
Tbrg1	25547	ENSMUSG00000011114	-0.27985	7.02097	6.27449	0.0122488	0.0558568
A430106G13Rik	1350	ENSMUSG00000098206	-0.751415	0.243899	6.27339	0.0122564	0.0558688
Pacsin1	35551	ENSMUSG00000040276	-0.741544	0.676121	6.26431	0.0123194	0.05611
Cxcr2	672	ENSMUSG00000026180	-0.829403	-0.0194981	6.26212	0.0123347	0.0561567
Pgm1	13441	ENSMUSG00000029171	-0.271273	5.72842	6.26027	0.0123475	0.0561923
Rc3h2	2897	ENSMUSG00000075376	-0.297925	5.50501	6.25536	0.0123818	0.0563254
Atp5e	5471	ENSMUSG00000016252	-0.274446	5.87109	6.24223	0.0124739	0.0566522
Ogfod1	22839	ENSMUSG00000033009	-0.279092	5.39201	6.23681	0.0125121	0.056741
Ctdnep1	28290	ENSMUSG00000018559	-0.246946	6.98664	6.23658	0.0125138	0.056741
Pebp1	14200	ENSMUSG00000032959	-0.206556	7.76521	6.23459	0.0125278	0.0567817
Clcn5	5753	ENSMUSG00000004317	-0.327855	4.2802	6.2252	0.0125944	0.0569911
Map2k2	21029	ENSMUSG00000035027	-0.272431	7.2655	6.22042	0.0126285	0.0571222
Mex3c	37757	ENSMUSG00000037253	-0.278002	5.9439	6.21875	0.0126404	0.0571529
Ifi27	32240	ENSMUSG00000064215	-0.271228	6.04942	6.20135	0.0127653	0.0576243
Ccr2	26981	ENSMUSG00000049103	-0.590341	1.77206	6.19862	0.012785	0.0576435
Creb3l4	9066	ENSMUSG00000027938	-0.679059	0.646576	6.16588	0.0130238	0.0585781
Hmga1	35545	ENSMUSG00000046711	-0.212322	8.84338	6.16174	0.0130543	0.0586918
Nlrc5	22853	ENSMUSG00000074151	-0.704169	4.41701	6.15849	0.0130783	0.0587523
Carhsp1	33988	ENSMUSG00000008393	-0.40587	4.85309	6.13869	0.0132255	0.0592144
Nme1	28938	ENSMUSG00000037601	-0.283799	6.38748	6.13825	0.0132288	0.0592144
Bcar3	9675	ENSMUSG00000028121	-1.02306	4.62744	6.1308	0.0132847	0.0594407
4921536K21Rik	27026	ENSMUSG00000020434	-0.688599	0.561055	6.11949	0.0133699	0.0597265
Gm6166	25939	ENSMUSG00000074280	-0.330931	5.09296	6.1126	0.0134222	0.0599359
Sema4c	269	ENSMUSG00000026121	-0.51295	2.46871	6.07913	0.0136788	0.0609115
Nedd4	26199	ENSMUSG00000032216	-0.650802	1.24908	6.07462	0.0137138	0.0610188
Pgk1	7353	ENSMUSG00000062070	-0.184519	9.60917	6.04958	0.0139096	0.0618161
Sh3kbp1	8148	ENSMUSG00000040990	-0.334424	4.77139	6.04364	0.0139565	0.0619752
Eef1b2	553	ENSMUSG00000025967	-0.182722	9.45958	6.03767	0.0140038	0.0621606
Grpel1	13286	ENSMUSG00000029198	-0.271871	6.13991	6.02989	0.0140656	0.0623441
Jagn1	16251	ENSMUSG00000051256	-0.265374	5.68504	6.02927	0.0140705	0.0623441
Limd1	26964	ENSMUSG00000025239	-0.24972	6.66926	6.02896	0.014073	0.0623441
Inppl1	19143	ENSMUSG00000032737	-0.229278	7.18655	6.03144	0.0140533	0.0623441
Mthfr	12611	ENSMUSG00000029009	-0.470802	4.94227	5.99607	0.0143378	0.0633414
Tmbim1	680	ENSMUSG00000006301	-0.230618	6.82399	5.99309	0.014362	0.0634232
Eno1b	37537	ENSMUSG00000059040	-0.202396	8.4978	5.99023	0.0143853	0.0635009
Eif3d	33313	ENSMUSG00000016554	-0.209918	7.70317	5.98781	0.0144051	0.0635632
Ptpla	2282	ENSMUSG00000063275	-0.487457	2.72747	5.97936	0.0144743	0.0638433
Creb3	10540	ENSMUSG00000028466	-0.287788	5.15878	5.97433	0.0145156	0.0640003
Trp53rk	5313	ENSMUSG00000042854	-0.4081	2.78609	5.96234	0.0146146	0.064327
Rps13	19573	ENSMUSG00000090862	-0.202759	8.70364	5.94537	0.014756	0.0648811
1110065P20Rik	11888	ENSMUSG00000078570	-0.415368	3.36082	5.94087	0.0147937	0.0650214
mt-Tl2	39171	ENSMUSG00000064366	-0.831783	0.330803	5.93041	0.0148818	0.0652713
Pim2	5789	ENSMUSG00000031155	-0.384241	3.65252	5.92927	0.0148914	0.0652713
Gng5	9893	ENSMUSG00000068523	-0.301022	6.12006	5.92569	0.0149217	0.0653781
Tmem68	9999	ENSMUSG00000028232	-0.293679	4.83977	5.90966	0.0150581	0.065821
Me3	18986	ENSMUSG00000030621	-0.687287	0.474167	5.90059	0.0151358	0.0661349
Clic1	35844	ENSMUSG00000007041	-0.199196	9.18816	5.8898	0.0152288	0.0664374
Dffa	12644	ENSMUSG00000028974	-0.28827	4.53434	5.88644	0.0152579	0.0665125
Nampt	31598	ENSMUSG00000020572	-0.282748	7.09538	5.88142	0.0153015	0.0665985
Rpl9-ps6	38495	ENSMUSG00000062456	-0.57534	2.25156	5.8799	0.0153147	0.0666041
Tmem115	26638	ENSMUSG00000010045	-0.285357	5.28983	5.87156	0.0153874	0.0667716
Psenen	17895	ENSMUSG00000036835	-0.267831	5.51873	5.87226	0.0153813	0.0667716
Sdccag3	2544	ENSMUSG00000026927	-0.25956	5.8374	5.87375	0.0153683	0.0667716
Ms4a6c	38235	ENSMUSG00000079419	-0.351186	5.30825	5.86184	0.0154726	0.0670561
Dnajc11	12706	ENSMUSG00000039768	-0.205386	7.52374	5.85766	0.0155094	0.0671632
Sp100	826	ENSMUSG00000026222	-0.713046	5.58128	5.85102	0.015568	0.0673291
Gm11361	30366	ENSMUSG00000061330	-0.309897	4.64921	5.84448	0.0156259	0.0674713
Lamc1	1445	ENSMUSG00000026478	-0.230102	8.30379	5.84002	0.0156656	0.0675781
Rps9	16944	ENSMUSG00000006333	-0.182176	10.2574	5.83076	0.0157483	0.0678299
Clcn7	35437	ENSMUSG00000036636	-0.294978	5.16095	5.8248	0.0158018	0.0679817
Fbxo33	31775	ENSMUSG00000035329	-0.284303	5.22269	5.82263	0.0158212	0.0680392
Abcc4	25076	ENSMUSG00000032849	-0.224472	6.95646	5.81521	0.0158882	0.0682484
Coq4	2645	ENSMUSG00000026798	-0.289461	4.53182	5.81131	0.0159234	0.0683545
Fbxo11	36649	ENSMUSG00000005371	-0.256184	6.35794	5.79559	0.0160664	0.0688006
Plod3	14542	ENSMUSG00000004846	-0.209322	7.52409	5.79576	0.0160648	0.0688006
Fam207a	20845	ENSMUSG00000032977	-0.278375	5.53609	5.76398	0.016358	0.0698638
Rcor1	32466	ENSMUSG00000037896	-0.263016	5.87178	5.75075	0.0164816	0.0703378
Rnf11	11511	ENSMUSG00000028557	-0.29052	5.59896	5.74848	0.0165029	0.0703752
Zfp334	5283	ENSMUSG00000017667	-0.472235	2.265	5.74136	0.01657	0.0706342
Klra2	16656	ENSMUSG00000030187	-0.752473	0.415623	5.73519	0.0166283	0.0708557
Pmm2	33987	ENSMUSG00000022711	-0.261867	6.35163	5.73157	0.0166626	0.0709207
Csf2ra	38886	ENSMUSG00000059326	-0.222183	7.16256	5.73202	0.0166583	0.0709207
D330050G23Rik	4209	ENSMUSG00000085316	-0.439088	2.77793	5.71812	0.0167907	0.0713573
Gapdhs	17915	ENSMUSG00000061099	-0.767489	0.0510055	5.71662	0.016805	0.0713909
Acsl4	7840	ENSMUSG00000031278	-0.242048	6.93216	5.70899	0.0168783	0.0716205
Stat3	29294	ENSMUSG00000004040	-0.329816	5.65937	5.70588	0.0169082	0.0716931
Arih2	26706	ENSMUSG00000064145	-0.259908	5.42851	5.70444	0.0169221	0.0717247
Tfe3	5784	ENSMUSG00000000134	-0.220174	7.37387	5.69928	0.0169719	0.0718813
BC051226	35731	ENSMUSG00000092564	-0.633037	0.870327	5.68196	0.0171402	0.0724845
Taf10	19380	ENSMUSG00000043866	-0.232226	6.82952	5.66948	0.0172626	0.0728366
Tagln	25777	ENSMUSG00000032085	-0.553459	1.4706	5.66356	0.0173209	0.0730274
Med27	2635	ENSMUSG00000026799	-0.324539	4.63364	5.65728	0.0173831	0.073262
Pgs1	29786	ENSMUSG00000017715	-0.242285	6.93847	5.65291	0.0174264	0.0733617
Elovl1	11702	ENSMUSG00000006390	-0.220418	7.39099	5.65295	0.017426	0.0733617
Pwp2	20880	ENSMUSG00000032834	-0.239553	6.5642	5.64643	0.0174909	0.0736055
Prkrip1	14529	ENSMUSG00000039737	-0.292202	5.05113	5.64418	0.0175134	0.0736448
Rpl29	26599	ENSMUSG00000048758	-0.278909	5.97437	5.64068	0.0175484	0.0737361
Psmb2	11939	ENSMUSG00000028837	-0.227183	7.72096	5.62472	0.0177089	0.0742519
H13	4921	ENSMUSG00000019188	-0.210744	7.96662	5.62451	0.017711	0.0742519
Ndufa7	35724	ENSMUSG00000041881	-0.2727	5.30348	5.61407	0.0178169	0.0745625
Snord58b	37781	ENSMUSG00000064871	-0.706247	0.31528	5.61142	0.0178438	0.074613
1700112E06Rik	23745	ENSMUSG00000063458	-0.560939	1.26447	5.59517	0.0180101	0.0751955
Tmem150a	15837	ENSMUSG00000055912	-0.590591	1.07399	5.59214	0.0180412	0.0752974
Enthd2	29841	ENSMUSG00000025377	-0.301161	4.61122	5.58688	0.0180955	0.075496
Cndp2	37863	ENSMUSG00000024644	-0.23206	6.77439	5.58522	0.0181127	0.0755393
Stoml1	25969	ENSMUSG00000032333	-0.454027	3.11751	5.56829	0.0182886	0.0761594
Irf8	23226	ENSMUSG00000041515	-0.288024	6.36092	5.56891	0.0182821	0.0761594
Sphk2	18305	ENSMUSG00000057342	-0.302131	5.91251	5.55892	0.0183868	0.0764827
Ifi27l2a	32241	ENSMUSG00000079017	-0.397748	4.78557	5.55615	0.0184159	0.0765753
Rwdd4a	22275	ENSMUSG00000031568	-0.241155	6.43117	5.5452	0.0185315	0.0769985
Nt5dc3	21145	ENSMUSG00000054027	-0.264535	5.46549	5.54342	0.0185503	0.0770482
Zswim8	23726	ENSMUSG00000021819	-0.253922	6.11018	5.54006	0.018586	0.0771676
Cct7	15963	ENSMUSG00000030007	-0.179156	9.15042	5.52286	0.0187695	0.0777853
Grina	33241	ENSMUSG00000022564	-0.337813	5.51915	5.51762	0.0188259	0.0779611
Fem1a	36353	ENSMUSG00000043683	-0.241459	6.47908	5.50747	0.0189354	0.0783565
Slc35a4	37383	ENSMUSG00000033272	-0.230542	7.19471	5.50809	0.0189287	0.0783565
Lst1	35865	ENSMUSG00000073412	-0.423096	3.15134	5.50659	0.0189449	0.0783669
Atp5d	20963	ENSMUSG00000003072	-0.199382	7.99625	5.50203	0.0189944	0.0785427
Fcgr4	1685	ENSMUSG00000059089	-1.03595	-0.120361	5.49667	0.0190527	0.0787546
Ciapin1	22864	ENSMUSG00000031781	-0.260578	6.15838	5.47628	0.0192762	0.0795314
Plekhj1	21007	ENSMUSG00000035278	-0.255161	6.19983	5.47687	0.0192697	0.0795314
Ndufa2	37387	ENSMUSG00000014294	-0.265275	5.40262	5.46563	0.0193941	0.0799585
Psmb6	28326	ENSMUSG00000018286	-0.205482	7.54777	5.45748	0.0194848	0.0802437
Cox6a1	14159	ENSMUSG00000041697	-0.246883	7.53217	5.45651	0.0194956	0.0802586
Pdrg1	4936	ENSMUSG00000027472	-0.251381	5.66819	5.44515	0.0196228	0.0807036
Mov10	9471	ENSMUSG00000002227	-0.524335	5.6776	5.44293	0.0196477	0.0807657
Mat2a	15842	ENSMUSG00000053907	-0.186819	8.81231	5.44221	0.0196557	0.0807692
Lpar2	22426	ENSMUSG00000031861	-0.533618	1.53766	5.43783	0.0197051	0.0809423
Sag	885	ENSMUSG00000056055	-0.422034	3.13306	5.43154	0.0197763	0.0811153
Ptgir	17386	ENSMUSG00000043017	-0.262453	4.88515	5.42355	0.0198669	0.0814424
Slc35a2	5790	ENSMUSG00000031156	-0.278311	4.15343	5.41867	0.0199225	0.0815954
Eif3i	12015	ENSMUSG00000028798	-0.191946	7.89901	5.41514	0.0199629	0.0817309
Sh3bp2	13252	ENSMUSG00000054520	-0.230408	6.7919	5.41341	0.0199827	0.0817818
Hax1	9051	ENSMUSG00000027944	-0.18443	8.21731	5.40512	0.0200777	0.0821409
Tatdn2	16264	ENSMUSG00000056952	-0.234634	7.02119	5.40443	0.0200857	0.0821436
Phf11c	24647	ENSMUSG00000091144	-0.741373	2.81773	5.39946	0.0201429	0.0823339
Mrpl30	296	ENSMUSG00000026087	-0.260966	5.94867	5.39911	0.020147	0.0823339
Cct3	8963	ENSMUSG00000001416	-0.177657	9.72036	5.39409	0.020205	0.0825106
Cbwd1	38425	ENSMUSG00000024878	-0.264996	4.81586	5.3912	0.0202385	0.0826172
Rplp0	14171	ENSMUSG00000067274	-0.178251	10.0951	5.38946	0.0202588	0.0826697
Apba3	21042	ENSMUSG00000004931	-0.280186	4.75912	5.3873	0.0202838	0.0827416
Apoe	17481	ENSMUSG00000002985	-0.28882	4.13796	5.38225	0.0203426	0.082808
Ndufa4	14947	ENSMUSG00000029632	-0.246932	6.71595	5.38145	0.0203519	0.082808
Tln1	10539	ENSMUSG00000028465	-0.23949	9.66453	5.38213	0.0203441	0.082808
Kpna3	24672	ENSMUSG00000021929	-0.225427	7.11554	5.38343	0.0203288	0.082808
Gtpbp4	29987	ENSMUSG00000021149	-0.205194	7.62201	5.38171	0.0203489	0.082808
Aprt	23279	ENSMUSG00000006589	-0.186323	8.00904	5.3838	0.0203246	0.082808
Unc93b1	37909	ENSMUSG00000036908	-0.216876	8.19593	5.37579	0.0204181	0.0830169
Sptbn2	37954	ENSMUSG00000067889	-0.834915	0.8511	5.36564	0.0205373	0.0834361
1810022K09Rik	8363	ENSMUSG00000078784	-0.276724	4.80946	5.3651	0.0205436	0.0834361
Rpl22l1	8443	ENSMUSG00000039221	-0.280061	5.94421	5.36352	0.0205622	0.0834576
Atp5g1	29017	ENSMUSG00000006057	-0.234716	6.85831	5.35154	0.020704	0.0839958
Ift43	32071	ENSMUSG00000007867	-0.362681	3.12855	5.34682	0.0207601	0.084193
Eno2	16480	ENSMUSG00000004267	-0.774178	1.30087	5.33921	0.020851	0.0844832
Timm13	21017	ENSMUSG00000020219	-0.251908	6.22718	5.32884	0.0209754	0.0848504
Tceb1	113	ENSMUSG00000079658	-0.25049	5.78009	5.32264	0.0210501	0.0850697
Ntmt1	2691	ENSMUSG00000026857	-0.272565	4.93572	5.32125	0.0210669	0.0850974
Telo2	35435	ENSMUSG00000024170	-0.253193	5.76854	5.3167	0.021122	0.0852583
Eml5	32170	ENSMUSG00000051166	-0.409201	2.56725	5.28995	0.0214489	0.0863906
Gng12	15670	ENSMUSG00000036402	-0.252206	5.37047	5.28477	0.0215127	0.0866165
Aurkaip1	12814	ENSMUSG00000065990	-0.25907	6.00339	5.28172	0.0215504	0.0867372
Fitm2	5191	ENSMUSG00000048486	-0.277976	4.13811	5.28021	0.0215692	0.0867814
Fxr2	28250	ENSMUSG00000018765	-0.209883	7.05072	5.27492	0.0216348	0.0870139
Pml	25967	ENSMUSG00000036986	-0.839727	5.39279	5.27218	0.0216689	0.0871199
Trim12a	19304	ENSMUSG00000066258	-0.615714	1.39461	5.26379	0.0217736	0.087415
Il20rb	26521	ENSMUSG00000044244	-0.627723	1.05217	5.25785	0.021848	0.0876679
Nub1	13070	ENSMUSG00000028954	-0.302917	5.47232	5.25343	0.0219036	0.087818
Psmd3	29150	ENSMUSG00000017221	-0.205851	8.0794	5.25328	0.0219054	0.087818
Yif1a	37977	ENSMUSG00000024875	-0.282616	5.11851	5.25213	0.0219199	0.0878448
Rpl28	16999	ENSMUSG00000030432	-0.197257	9.66935	5.24218	0.0220456	0.0882536
Mid1	8280	ENSMUSG00000035299	-0.444726	2.88635	5.23932	0.0220819	0.0883037
Mlx	29301	ENSMUSG00000017801	-0.281815	5.48089	5.23963	0.022078	0.0883037
Idi1	29979	ENSMUSG00000058258	-0.239655	6.28264	5.23123	0.0221849	0.0886382
Cox19	14640	ENSMUSG00000045438	-0.296239	4.22077	5.22121	0.022313	0.08896
Timm21	37872	ENSMUSG00000024645	-0.251059	5.52387	5.22085	0.0223176	0.08896
Pcmt1	20178	ENSMUSG00000019795	-0.239989	6.17832	5.21891	0.0223426	0.0890279
Eif5	32477	ENSMUSG00000021282	-0.179897	8.60833	5.19911	0.0225985	0.0899514
Rnf14	37442	ENSMUSG00000060450	-0.258041	5.22091	5.19439	0.0226599	0.0901316
Slc27a3	9072	ENSMUSG00000027932	-0.526471	2.42192	5.19135	0.0226996	0.0902251
Camk1d	2077	ENSMUSG00000039145	-0.238097	6.28798	5.18974	0.0227206	0.0902767
Gm26909	22034	ENSMUSG00000097839	-0.661467	0.455145	5.18447	0.0227896	0.0905185
Rpl35a-ps2	1882	ENSMUSG00000081214	-0.85222	0.337335	5.18251	0.0228153	0.0905886
Tceb2	35356	ENSMUSG00000055839	-0.235134	6.71214	5.17445	0.0229215	0.0909152
Kpna4	8799	ENSMUSG00000027782	-0.217418	6.77	5.17379	0.0229301	0.0909152
Agpat1	35796	ENSMUSG00000034254	-0.245649	6.66267	5.16711	0.0230184	0.0911748
Eva1b	11916	ENSMUSG00000050212	-0.931571	-0.0330026	5.16609	0.023032	0.0911898
1500011B03Rik	14123	ENSMUSG00000072694	-0.355187	3.19508	5.16402	0.0230594	0.0912661
Gm22579	25239	ENSMUSG00000065663	-0.482156	2.34916	5.15935	0.0231216	0.0914797
Ssr4	6768	ENSMUSG00000002014	-0.217045	6.80135	5.15403	0.0231925	0.091663
Necap1	16420	ENSMUSG00000030327	-0.251335	5.36742	5.1529	0.0232076	0.0916901
Mif4gd	29682	ENSMUSG00000020743	-0.269835	4.73302	5.1494	0.0232544	0.0918427
Snapc4	2542	ENSMUSG00000036281	-0.257965	5.59508	5.14375	0.0233303	0.0920771
Rps27rt	26834	ENSMUSG00000050621	-0.220306	8.37189	5.13371	0.0234655	0.0924802
Nradd	26770	ENSMUSG00000032491	-0.364498	2.97797	5.13292	0.0234763	0.09249
Fyco1	26975	ENSMUSG00000025241	-0.270462	4.58615	5.12978	0.0235186	0.0926244
Rpl23a	28599	ENSMUSG00000058546	-0.187276	9.01302	5.11702	0.0236922	0.0931043
Neurl4	28282	ENSMUSG00000047284	-0.238807	6.26229	5.11148	0.023768	0.0933433
Ambp	10918	ENSMUSG00000028356	-0.446213	2.37069	5.11003	0.0237879	0.0933559
Polr1d	14792	ENSMUSG00000029642	-0.223535	6.90033	5.10903	0.0238016	0.0933767
Tomm40	17482	ENSMUSG00000002984	-0.195852	7.485	5.10685	0.0238315	0.0934614
C920009B18Rik	20314	ENSMUSG00000097352	-0.335219	3.91188	5.10452	0.0238636	0.0935544
Tuba1c	33724	ENSMUSG00000043091	-0.182173	8.21605	5.08963	0.0240694	0.0941958
Rpl7a	2567	ENSMUSG00000062647	-0.177473	10.5125	5.08477	0.0241368	0.0943937
Flt3l	18254	ENSMUSG00000089989	-0.570874	1.56007	5.08355	0.0241538	0.0944272
Gm1821	24139	ENSMUSG00000044285	-1.17765	1.03044	5.0829	0.0241629	0.0944298
Trps1	33012	ENSMUSG00000038679	-0.267084	4.64629	5.07589	0.0242608	0.0947237
Cirh1a	23031	ENSMUSG00000041438	-0.206556	7.26994	5.06873	0.0243613	0.0950056
Mrpl38	29711	ENSMUSG00000020775	-0.216706	6.76551	5.06605	0.024399	0.095045
Adam17	31514	ENSMUSG00000052593	-0.211961	7.62867	5.06667	0.0243902	0.095045
Vhl	16261	ENSMUSG00000033933	-0.279984	4.58166	5.0639	0.0244292	0.0951047
Swt1	1426	ENSMUSG00000052748	-0.271415	4.18386	5.05943	0.0244923	0.0952506
Kctd21	19042	ENSMUSG00000044952	-0.528337	1.70841	5.05598	0.0245411	0.0953409
Ap2m1	34226	ENSMUSG00000022841	-0.176769	8.47696	5.05357	0.0245753	0.0954097
Rpl31-ps8	33615	ENSMUSG00000067870	-0.457748	3.24771	5.05142	0.0246057	0.0954262
Ceacam16	17492	ENSMUSG00000014686	-0.603607	0.979194	5.05014	0.0246239	0.0954636
Eno1	12686	ENSMUSG00000063524	-0.177687	10.7779	5.03212	0.0248814	0.0962947
2410004N09Rik	37317	ENSMUSG00000087590	-0.297554	3.69909	5.03071	0.0249016	0.0963397
Ogfod2	14357	ENSMUSG00000023707	-0.280604	4.01714	5.02918	0.0249237	0.0963582
Gm15487	15211	ENSMUSG00000080242	-0.248194	6.026	5.02341	0.0250068	0.0965463
6530402F18Rik	2634	ENSMUSG00000079499	-0.586834	0.863979	5.02261	0.0250184	0.0965574
Setdb2	24648	ENSMUSG00000071350	-0.480585	4.27735	5.00598	0.0252598	0.097267
Atg4d	25349	ENSMUSG00000002820	-0.268428	4.6607	5.00516	0.0252718	0.097267
Snhg6	53	ENSMUSG00000098234	-0.265802	4.39295	5.00568	0.0252643	0.097267
Ccdc88b	38082	ENSMUSG00000047810	-0.231696	7.18546	5.00675	0.0252487	0.097267
Gm7901	22578	ENSMUSG00000082280	-0.31237	3.70485	5.00188	0.0253198	0.0974081
Gm10499	35954	ENSMUSG00000073403	-0.397467	2.46954	4.99573	0.02541	0.0976305
1810024B03Rik	4436	ENSMUSG00000044145	-0.665499	0.194887	4.98098	0.0256274	0.0983308
Hoxb4	29034	ENSMUSG00000038692	-0.385497	2.77424	4.9812	0.0256242	0.0983308
Il15ra	2264	ENSMUSG00000023206	-0.448896	2.8299	4.96839	0.0258146	0.0989198
Lsg1	34351	ENSMUSG00000022538	-0.242214	6.34645	4.96828	0.0258163	0.0989198
Akr1a1	11627	ENSMUSG00000028692	-0.180765	9.19647	4.96526	0.0258614	0.0989906
Fis1	14539	ENSMUSG00000019054	-0.248989	5.83965	4.96404	0.0258797	0.0990267
Ino80e	19739	ENSMUSG00000030689	-0.225254	6.87004	4.96073	0.0259292	0.0990588
Nedd8	24555	ENSMUSG00000010376	-0.206387	6.98234	4.96058	0.0259315	0.0990588
Slc25a22	20023	ENSMUSG00000019082	-0.386233	6.13353	4.9518	0.0260636	0.099458
Wdr73	18829	ENSMUSG00000025722	-0.254648	5.17873	4.94294	0.0261974	0.0999346
Pcid2	21832	ENSMUSG00000038542	-0.25544	5.65103	4.93791	0.0262739	0.100122
Btf3	31158	ENSMUSG00000021660	-0.171567	8.95957	4.93823	0.0262689	0.100122
9330175E14Rik	22852	ENSMUSG00000097194	-0.755203	1.65673	4.92841	0.0264186	0.100538
Prkar1b	14633	ENSMUSG00000025855	-0.483456	2.36263	4.92871	0.026414	0.100538
Tmem62	4317	ENSMUSG00000054484	-0.347239	3.21707	4.92081	0.026535	0.100878
Snx20	22792	ENSMUSG00000031662	-0.298046	4.44279	4.91567	0.0266142	0.101024
Gpr137	38089	ENSMUSG00000024958	-0.269716	4.23705	4.91637	0.0266033	0.101024
Cyth4	33335	ENSMUSG00000018008	-0.188253	9.51071	4.91538	0.0266186	0.101024
Dnah17	29788	ENSMUSG00000033987	-0.385698	2.6623	4.90503	0.0267786	0.101528
null	26986	ENSMUSG00000095352	-0.35657	3.36472	4.90534	0.0267737	0.101528
Dnmt3a	31382	ENSMUSG00000020661	-0.33259	7.2527	4.90265	0.0268156	0.101634
Heatr6	28762	ENSMUSG00000000976	-0.246944	5.37773	4.89001	0.0270125	0.102241
Rpl5	13951	ENSMUSG00000058558	-0.169171	10.0551	4.88034	0.0271642	0.102781
Ager	35793	ENSMUSG00000015452	-0.703282	0.277689	4.87757	0.0272078	0.102911
Bcat1	16823	ENSMUSG00000030268	-0.194182	7.46802	4.87425	0.0272602	0.103074
Slc35e4	27028	ENSMUSG00000048807	-0.230618	6.65142	4.87127	0.0273074	0.103218
Tfec	14970	ENSMUSG00000029553	-0.628343	0.771019	4.86826	0.0273551	0.103363
Map1b	31176	ENSMUSG00000052727	-0.595962	1.69412	4.85092	0.0276314	0.104336
AI597479	353	ENSMUSG00000010290	-0.26968	4.49686	4.84563	0.0277163	0.104622
Serpinb9b	30429	ENSMUSG00000021403	-0.545041	1.46879	4.84259	0.0277652	0.104717
Lrrc39	9626	ENSMUSG00000027961	-0.54235	1.43902	4.84231	0.0277696	0.104717
Mphosph6	23180	ENSMUSG00000031843	-0.248085	5.87051	4.83555	0.0278787	0.104951
Hook2	22720	ENSMUSG00000052566	-0.323219	3.93217	4.83462	0.0278938	0.104973
Oas1c	14254	ENSMUSG00000001166	-0.612498	2.18521	4.82885	0.0279873	0.105142
Athl1	19989	ENSMUSG00000062031	-0.271412	4.23967	4.83004	0.027968	0.105142
Tspo	33507	ENSMUSG00000041736	-0.257591	5.57282	4.82793	0.0280023	0.105142
Cwc25	29099	ENSMUSG00000018541	-0.247594	4.66108	4.82921	0.0279814	0.105142
Dcun1d5	25160	ENSMUSG00000032002	-0.216858	6.62482	4.82902	0.0279845	0.105142
Atp5g3	3315	ENSMUSG00000018770	-0.180223	7.79207	4.82651	0.0280253	0.105184
Prnp	4588	ENSMUSG00000079037	-0.431073	3.64174	4.8224	0.0280922	0.105365
Cox5b	274	ENSMUSG00000061518	-0.211352	7.16569	4.8204	0.0281248	0.105367
Aff1	13875	ENSMUSG00000029313	-0.24471	6.10298	4.80873	0.0283159	0.105884
Gm6472	8030	ENSMUSG00000095597	-0.221436	6.56289	4.79955	0.0284671	0.106363
Rpl3-ps1	5925	ENSMUSG00000084349	-0.177759	8.23528	4.79325	0.0285715	0.106697
Plk3	11655	ENSMUSG00000028680	-0.260021	5.28679	4.7869	0.0286771	0.107036
Bcar1	23126	ENSMUSG00000031955	-0.572692	0.881091	4.78326	0.0287377	0.10721
Pex16	3872	ENSMUSG00000027222	-0.318367	3.38726	4.78251	0.0287501	0.107221
Rpl10	6791	ENSMUSG00000008682	-0.171389	10.0884	4.77611	0.0288573	0.107548
Ugcg	10825	ENSMUSG00000028381	-0.255589	4.85553	4.77492	0.0288772	0.107587
Tpst1	14434	ENSMUSG00000034118	-0.347786	5.90433	4.77397	0.0288932	0.107611
Tap2	35766	ENSMUSG00000024339	-0.390833	3.8127	4.7714	0.0289363	0.107699
Sdc3	12054	ENSMUSG00000025743	-0.447293	4.21373	4.75097	0.0292818	0.10884
Serpinb1b	30430	ENSMUSG00000051029	-0.618429	0.93192	4.74683	0.0293523	0.10903
Zak	3277	ENSMUSG00000004085	-0.236329	6.3513	4.74424	0.0293965	0.109158
Fam46a	26356	ENSMUSG00000032265	-0.882986	2.43706	4.74055	0.0294597	0.109337
Pop1	32897	ENSMUSG00000022325	-0.239284	5.4546	4.74028	0.0294644	0.109337
Trim14	10636	ENSMUSG00000039853	-0.406373	4.04444	4.73844	0.0294957	0.109417
Znhit2	38043	ENSMUSG00000075227	-0.264508	4.56494	4.72357	0.0297519	0.110258
Rabgef1	14436	ENSMUSG00000025340	-0.24965	4.88094	4.72379	0.0297481	0.110258
Dpm2	2752	ENSMUSG00000026810	-0.260172	5.1116	4.72211	0.0297772	0.110315
Sel1l	32149	ENSMUSG00000020964	-0.204472	7.21577	4.72029	0.0298087	0.110395
Mettl6	23857	ENSMUSG00000021891	-0.240977	4.89228	4.71919	0.0298278	0.110429
Clic4	12201	ENSMUSG00000037242	-0.166375	9.16654	4.7175	0.0298571	0.110501
Erdr1	37081	ENSMUSG00000096768	-0.242023	6.57946	4.70931	0.0299997	0.110916
Efnb1	7156	ENSMUSG00000031217	-0.428832	2.35972	4.70677	0.0300441	0.110973
Stam	2284	ENSMUSG00000026718	-0.269387	4.53127	4.70396	0.0300932	0.111117
Ppp2r1a	35262	ENSMUSG00000007564	-0.216003	8.13761	4.70059	0.0301523	0.111299
Catsper2	4335	ENSMUSG00000033486	-0.579689	0.877665	4.6957	0.0302382	0.111468
Atp6v0e	35517	ENSMUSG00000015575	-0.231319	6.70823	4.69126	0.0303165	0.111683
1110008P14Rik	2744	ENSMUSG00000039195	-0.263399	4.29612	4.6893	0.0303511	0.1117
Eif2s2	4993	ENSMUSG00000074656	-0.175954	8.26687	4.68978	0.0303426	0.1117
Emg1	16469	ENSMUSG00000004268	-0.188917	7.47885	4.6861	0.0304075	0.111835
Psmb5	24499	ENSMUSG00000022193	-0.204964	7.02177	4.68199	0.0304804	0.112066
Adcy7	22789	ENSMUSG00000031659	-0.196209	8.59039	4.67851	0.0305423	0.112219
1810037I17Rik	9683	ENSMUSG00000054091	-0.232139	6.04955	4.67566	0.0305929	0.112331
Eef1a1	26302	ENSMUSG00000037742	-0.175057	13.3405	4.67463	0.0306114	0.112362
Eif4ebp1	22106	ENSMUSG00000031490	-0.230179	6.76624	4.67165	0.0306645	0.112483
Cyth1	29790	ENSMUSG00000017132	-0.261361	4.61145	4.66528	0.0307785	0.112864
Pam16	33942	ENSMUSG00000014301	-0.27193	4.25223	4.6601	0.0308713	0.113057
2700081O15Rik	38112	ENSMUSG00000053080	-0.33684	3.24421	4.65649	0.0309365	0.113221
Manbal	5090	ENSMUSG00000063019	-0.307868	3.95201	4.65402	0.0309808	0.113272
Dusp9	6759	ENSMUSG00000031383	-0.741384	0.0222536	4.64809	0.0310881	0.11359
Akap13	18760	ENSMUSG00000066406	-0.263216	6.72971	4.64858	0.0310792	0.11359
1110038F14Rik	33287	ENSMUSG00000063236	-0.246008	4.86261	4.64331	0.0311748	0.113758
Naa20	4750	ENSMUSG00000002728	-0.251131	6.60191	4.64018	0.0312317	0.113891
Msra	24730	ENSMUSG00000054733	-0.257199	4.21516	4.63653	0.0312982	0.114059
Rsl24d1	26218	ENSMUSG00000032215	-0.228954	6.43668	4.62324	0.0315415	0.114652
Ezr	35062	ENSMUSG00000052397	-0.248184	6.11032	4.5994	0.0319831	0.115988
Rrp15	1938	ENSMUSG00000001305	-0.219186	6.48377	4.59451	0.0320745	0.116244
Cdip1	33949	ENSMUSG00000004071	-0.242603	4.9948	4.58823	0.0321922	0.116595
Rsad1	28952	ENSMUSG00000039096	-0.511244	1.18216	4.5742	0.0324568	0.117414
null	17791	ENSMUSG00000037513	-0.236578	6.29128	4.57444	0.0324524	0.117414
Id1	4924	ENSMUSG00000042745	-0.306945	4.73912	4.57278	0.0324838	0.117461
Phtf2	12991	ENSMUSG00000039987	-0.247193	5.66556	4.57134	0.0325111	0.117522
Supt6	28605	ENSMUSG00000002052	-0.174161	7.80863	4.56376	0.0326553	0.11789
Timm8b	25826	ENSMUSG00000039016	-0.240474	5.03718	4.56116	0.032705	0.118031
Hmx3	19867	ENSMUSG00000040148	-0.444356	2.70275	4.55909	0.0327444	0.118136
Dgat2	19077	ENSMUSG00000030747	-0.550717	1.38463	4.55641	0.0327958	0.118283
Aup1	15898	ENSMUSG00000068328	-0.195194	7.74097	4.5551	0.0328209	0.118335
Dph3	23868	ENSMUSG00000021905	-0.249605	4.74169	4.54134	0.0330856	0.119021
Max	31927	ENSMUSG00000059436	-0.209746	7.10165	4.5425	0.0330632	0.119021
Otub2	32237	ENSMUSG00000021203	-0.424195	2.32879	4.53193	0.0332681	0.119408
Trim41	27636	ENSMUSG00000040365	-0.243043	5.53873	4.5273	0.0333583	0.119617
Cfp	6014	ENSMUSG00000001128	-0.206651	7.33874	4.52581	0.0333874	0.119678
Eif3c	19712	ENSMUSG00000030738	-0.165179	8.98493	4.52532	0.0333968	0.119678
Gm8810	35944	ENSMUSG00000091373	-0.629658	0.588928	4.51981	0.0335045	0.119987
Ube2l3	34121	ENSMUSG00000038965	-0.207783	7.30033	4.51762	0.0335475	0.120064
Sf3a2	21008	ENSMUSG00000020211	-0.202786	7.57637	4.50836	0.0337296	0.120677
Uchl1	13486	ENSMUSG00000029223	-0.527291	1.28864	4.5073	0.0337505	0.120713
Srpr	25486	ENSMUSG00000032042	-0.185253	7.486	4.50457	0.0338044	0.120867
Rnpc3	9601	ENSMUSG00000027981	-0.246032	4.86266	4.50178	0.0338597	0.12092
Slc9a8	5335	ENSMUSG00000039463	-0.245052	5.31625	4.50229	0.0338494	0.12092
Usmg5	38758	ENSMUSG00000071528	-0.220838	6.52294	4.50077	0.0338796	0.120943
Nol4l	4948	ENSMUSG00000061411	-0.331076	5.43988	4.49481	0.0339978	0.12121
Pycr2	1872	ENSMUSG00000026520	-0.223744	6.26009	4.495	0.0339942	0.12121
Myeov2	965	ENSMUSG00000073616	-0.256926	4.7933	4.49343	0.0340254	0.12127
Zfp655	14758	ENSMUSG00000007812	-0.260583	4.57556	4.49069	0.03408	0.121426
Masp2	12634	ENSMUSG00000028979	-0.403909	2.31636	4.47923	0.0343092	0.122203
Taf13	9567	ENSMUSG00000048100	-0.248958	5.19525	4.47708	0.0343523	0.122281
Afp	13704	ENSMUSG00000054932	-0.416194	2.41987	4.47355	0.0344235	0.122493
Gatsl3	27046	ENSMUSG00000020424	-0.577243	1.90544	4.46511	0.0345938	0.122998
Mocs1	36292	ENSMUSG00000064120	-0.263894	3.90428	4.46488	0.0345984	0.122998
Rrp7a	33494	ENSMUSG00000018040	-0.20962	7.10029	4.46246	0.0346475	0.123116
H3f3b	29705	ENSMUSG00000016559	-0.161126	9.86268	4.46196	0.0346577	0.123116
Polr3a	23755	ENSMUSG00000025280	-0.227136	5.66379	4.4595	0.0347077	0.12323
Furin	18821	ENSMUSG00000030530	-0.213755	7.45796	4.45861	0.0347258	0.123251
Fcer1g	1698	ENSMUSG00000058715	-0.181077	7.75689	4.45793	0.0347397	0.123251
Eif4g2	19527	ENSMUSG00000005610	-0.161918	10.4025	4.45759	0.0347466	0.123251
Fbxw9	22727	ENSMUSG00000008167	-0.315951	3.213	4.45461	0.0348072	0.123387
Ap1s1	14547	ENSMUSG00000004849	-0.167395	8.2706	4.44219	0.0350612	0.124169
Traf3	32468	ENSMUSG00000021277	-0.222595	6.27687	4.43257	0.0352594	0.124713
Gapdh	16506	ENSMUSG00000057666	-0.163955	11.2745	4.428	0.0353539	0.124969
Gm12191	27680	ENSMUSG00000083061	-0.574399	1.88239	4.42206	0.0354772	0.125365
Vdr	33676	ENSMUSG00000022479	-0.543273	1.05749	4.41961	0.0355281	0.125505
Hars	37391	ENSMUSG00000001380	-0.176176	7.58198	4.40578	0.0358174	0.126407
Gm4419	31517	ENSMUSG00000097055	-0.453428	1.82852	4.40434	0.0358477	0.126474
Gm26642	1300	ENSMUSG00000097680	-0.509481	1.9095	4.39245	0.0360985	0.127319
Syne2	31905	ENSMUSG00000063450	-0.675861	1.45155	4.3879	0.0361949	0.127578
Atg16l1	881	ENSMUSG00000026289	-0.228059	5.55408	4.37795	0.0364068	0.128204
Mrpl39	34827	ENSMUSG00000022889	-0.238316	6.23072	4.37721	0.0364225	0.128204
Ctsd	20064	ENSMUSG00000007891	-0.164204	9.76316	4.37687	0.0364299	0.128204
Commd4	25933	ENSMUSG00000032299	-0.247965	5.09771	4.3705	0.0365663	0.128644
Il4ra	19692	ENSMUSG00000030748	-0.535871	1.59815	4.36517	0.0366807	0.128965
Aamp	678	ENSMUSG00000006299	-0.199736	7.10283	4.36446	0.036696	0.128979
BC051077	14201	ENSMUSG00000097163	-0.425507	2.06988	4.35168	0.0369724	0.129664
Ppp1r13b	32490	ENSMUSG00000021285	-0.308223	3.98627	4.34907	0.0370292	0.129823
Psma3	31858	ENSMUSG00000060073	-0.174034	7.58884	4.34455	0.0371277	0.129979
Iqcc	12018	ENSMUSG00000040795	-0.344937	2.85192	4.33618	0.0373105	0.130563
Slc25a47	32347	ENSMUSG00000048856	-0.453127	1.96639	4.33534	0.0373291	0.130587
Phf11b	24645	ENSMUSG00000091649	-0.987955	2.85464	4.33303	0.0373798	0.130601
Wnt1	33712	ENSMUSG00000022997	-0.678886	1.56485	4.33342	0.037371	0.130601
Tnni2	20067	ENSMUSG00000031097	-0.231852	5.03099	4.33398	0.0373587	0.130601
Cinp	32462	ENSMUSG00000021276	-0.228675	5.68003	4.33376	0.0373636	0.130601
Layn	25840	ENSMUSG00000060594	-0.503904	2.03109	4.31826	0.0377055	0.131534
Lrrc8d	13911	ENSMUSG00000046079	-0.202889	6.82986	4.31648	0.0377449	0.13163
Nol10	31484	ENSMUSG00000061458	-0.228272	6.23261	4.30748	0.0379452	0.132246
Rrp12	38633	ENSMUSG00000035049	-0.215149	6.54986	4.30023	0.0381072	0.132728
Prmt1	18234	ENSMUSG00000052429	-0.163218	7.9763	4.29645	0.0381921	0.132982
mt-Tp	39177	ENSMUSG00000064372	-0.251726	4.38437	4.2951	0.0382222	0.133002
Atp1a3	17664	ENSMUSG00000040907	-0.210263	7.16713	4.29461	0.0382334	0.133002
Nuak2	1232	ENSMUSG00000009772	-0.24948	4.94016	4.29389	0.0382497	0.133017
Sys1	5230	ENSMUSG00000045503	-0.270722	4.58972	4.29084	0.0383183	0.133049
Tmem180	38739	ENSMUSG00000025227	-0.271706	4.75571	4.28597	0.0384281	0.13331
Hsd17b7	1662	ENSMUSG00000026675	-0.249279	5.0662	4.28271	0.0385018	0.133396
Lrig2	9463	ENSMUSG00000032913	-0.300618	3.74102	4.28122	0.0385357	0.133428
Gba2	10541	ENSMUSG00000028467	-0.278009	3.70815	4.27853	0.0385967	0.133476
Arf5	15062	ENSMUSG00000020440	-0.2217	6.03922	4.27889	0.0385885	0.133476
Mrps7	29681	ENSMUSG00000046756	-0.214272	6.57511	4.27666	0.0386391	0.133582
Mtf1	11886	ENSMUSG00000028890	-0.229159	4.91071	4.2724	0.0387362	0.133793
Mllt6	29091	ENSMUSG00000038437	-0.232916	6.36022	4.27159	0.0387547	0.133816
Ost4	13162	ENSMUSG00000038803	-0.28176	5.55439	4.2704	0.0387819	0.133868
Coro1a	19727	ENSMUSG00000030707	-0.170808	8.90548	4.26051	0.0390082	0.134566
Mrto4	12333	ENSMUSG00000028741	-0.190489	7.169	4.25372	0.0391643	0.135063
Ankrd13b	28567	ENSMUSG00000037907	-0.230045	6.37368	4.24274	0.0394184	0.135856
Oaz1	21011	ENSMUSG00000035242	-0.165945	8.53022	4.23991	0.0394842	0.135998
Mrpl17	19384	ENSMUSG00000030879	-0.196703	6.81921	4.23884	0.0395092	0.136043
1110004F10Rik	19571	ENSMUSG00000030663	-0.192059	7.14981	4.23336	0.0396369	0.136365
Slc30a7	9611	ENSMUSG00000054414	-0.216575	6.35682	4.22657	0.0397959	0.136677
Cript	36631	ENSMUSG00000024146	-0.239171	5.02194	4.1975	0.0404836	0.138528
Uba1	6003	ENSMUSG00000001924	-0.156746	9.33779	4.18853	0.0406984	0.139066
Tas1r3	12818	ENSMUSG00000029072	-0.677693	0.31677	4.18306	0.0408299	0.139325
Rpl3	33395	ENSMUSG00000060036	-0.153617	10.0291	4.17941	0.040918	0.139561
Irf2bpl	32083	ENSMUSG00000034168	-0.21613	7.06898	4.1753	0.0410173	0.139857
Cmtm3	22929	ENSMUSG00000031875	-0.212294	6.14964	4.17061	0.0411311	0.140117
Rbpsuh-rs3	15388	ENSMUSG00000079575	-0.259277	5.40807	4.1685	0.0411823	0.140206
Dynll1	14154	ENSMUSG00000009013	-0.1847	7.50635	4.16396	0.0412928	0.140496
Ube2v2	34086	ENSMUSG00000022674	-0.225251	5.95164	4.15977	0.0413949	0.140801
Stk19	35814	ENSMUSG00000061207	-0.237265	4.78013	4.15097	0.0416107	0.141389
Kti12	11497	ENSMUSG00000073775	-0.23	5.47723	4.15013	0.0416314	0.14139
Stard3	29132	ENSMUSG00000018167	-0.339091	5.91928	4.14616	0.041729	0.141678
Fam132a	12825	ENSMUSG00000023571	-0.524279	1.26972	4.14482	0.041762	0.141747
D11Wsu47e	29619	ENSMUSG00000041623	-0.250769	4.2019	4.14327	0.0418003	0.141748
Snrpa	17735	ENSMUSG00000061479	-0.203076	7.14448	4.14353	0.0417939	0.141748
Eif3g	25327	ENSMUSG00000070319	-0.160267	7.987	4.14035	0.0418726	0.141946
Rc3h1	1524	ENSMUSG00000040423	-0.230154	6.13616	4.13697	0.0419562	0.142104
3110009E18Rik	1130	ENSMUSG00000026388	-0.424554	1.8324	4.13221	0.0420744	0.142375
Sin3b	22560	ENSMUSG00000031622	-0.213741	6.27219	4.12211	0.0423263	0.142968
Rraga	11108	ENSMUSG00000070934	-0.221385	6.05127	4.12009	0.0423767	0.143052
Dad1	24484	ENSMUSG00000022174	-0.213162	6.55069	4.11875	0.0424104	0.143122
Psmd4	9218	ENSMUSG00000005625	-0.168804	7.97515	4.1118	0.0425851	0.14363
Smtn	27009	ENSMUSG00000020439	-0.476832	1.87532	4.11019	0.0426257	0.14371
Shox2	8772	ENSMUSG00000027833	-0.56043	0.6202	4.10556	0.0427425	0.143829
Prkacb	9900	ENSMUSG00000005034	-0.214062	6.18907	4.10544	0.0427454	0.143829
Psme1	24545	ENSMUSG00000022216	-0.210576	6.85564	4.10601	0.0427311	0.143829
Rps6kb2	37931	ENSMUSG00000024830	-0.256965	4.47787	4.10137	0.0428486	0.144079
Zbtb37	1526	ENSMUSG00000043467	-0.390594	2.39666	4.09595	0.042986	0.144454
Tma16	22380	ENSMUSG00000025591	-0.218235	6.10041	4.08983	0.043142	0.144848
Fth1	38185	ENSMUSG00000024661	-0.164692	12.6651	4.08248	0.04333	0.145348
Bola2	19726	ENSMUSG00000047721	-0.235965	5.93765	4.07946	0.0434076	0.145565
Ccdc58	34454	ENSMUSG00000075229	-0.237138	5.2087	4.07799	0.0434452	0.145647
Clptm1l	30948	ENSMUSG00000021610	-0.178662	7.55456	4.07635	0.0434875	0.145659
Rpl15-ps3	25393	ENSMUSG00000061167	-0.564575	2.13338	4.07446	0.0435362	0.145733
Tma7	26727	ENSMUSG00000091537	-0.214444	6.51061	4.07258	0.0435846	0.145763
Josd2	18204	ENSMUSG00000038695	-0.232611	5.41245	4.05507	0.0440389	0.146888
Eepd1	25423	ENSMUSG00000036611	-0.224904	4.98812	4.04549	0.0442894	0.147494
Lemd2	35538	ENSMUSG00000044857	-0.221943	5.53295	4.04317	0.0443505	0.147575
Wdr74	38144	ENSMUSG00000042729	-0.224973	6.08014	4.04144	0.0443959	0.147594
Lnx2	14791	ENSMUSG00000016520	-0.250563	5.04924	4.03972	0.0444413	0.147702
Rad52	16357	ENSMUSG00000030166	-0.232338	4.61475	4.03761	0.0444968	0.147798
Ddx56	27107	ENSMUSG00000004393	-0.214422	6.59736	4.03397	0.0445928	0.148073
Tut1	38171	ENSMUSG00000071645	-0.221622	5.80826	4.02835	0.0447417	0.148523
Arid5a	260	ENSMUSG00000037447	-0.455371	2.50684	4.0275	0.0447644	0.148554
Stk16	718	ENSMUSG00000026201	-0.232346	5.61286	4.02238	0.0449002	0.148828
Cd5l	8928	ENSMUSG00000015854	-0.640168	0.430991	4.01414	0.0451202	0.149513
Psmb8	35764	ENSMUSG00000024338	-0.276848	5.5874	4.01286	0.0451544	0.149582
Gm14303	5428	ENSMUSG00000081344	-0.572782	2.26951	4.01026	0.0452241	0.149684
Smco4	25244	ENSMUSG00000058173	-0.265577	3.81059	4.01021	0.0452254	0.149684
Mb21d1	26299	ENSMUSG00000032344	-0.216669	6.34846	4.00617	0.045334	0.149999
Bri3	14735	ENSMUSG00000047843	-0.261477	4.4512	4.00414	0.0453886	0.150081
Snhg1	38135	ENSMUSG00000097188	-0.213156	6.39152	4.00375	0.045399	0.150081
Senp2	34261	ENSMUSG00000022855	-0.208446	6.1638	4.00473	0.0453727	0.150081
Cds1	13864	ENSMUSG00000029330	-0.621402	0.696396	4.00301	0.045419	0.150103
2810001G20Rik	28131	ENSMUSG00000087497	-0.547228	0.898483	4.0015	0.0454597	0.150193
Tdrd7	10619	ENSMUSG00000035517	-0.402045	4.71421	3.99958	0.0455117	0.150253
Rnft1	28819	ENSMUSG00000020521	-0.243729	5.0564	3.99934	0.045518	0.150253
Tnks1bp1	3489	ENSMUSG00000033955	-0.315109	3.23627	3.99521	0.0456299	0.150566
D030056L22Rik	38373	ENSMUSG00000047044	-0.236482	5.29179	3.99484	0.0456399	0.150566
Ndufaf5	4678	ENSMUSG00000027384	-0.242982	4.27296	3.99432	0.0456539	0.150568
Atp6v1h	19	ENSMUSG00000033793	-0.214155	6.31964	3.99308	0.0456874	0.150634
Themis2	12112	ENSMUSG00000037731	-0.440058	5.71799	3.98868	0.0458069	0.150983
Qsox1	1476	ENSMUSG00000033684	-0.215628	5.34511	3.98735	0.0458431	0.151058
Gm12606	11187	ENSMUSG00000087659	-0.260641	3.91441	3.986	0.0458798	0.15109
2700038G22Rik	13041	ENSMUSG00000097180	-0.255039	4.4198	3.98498	0.0459078	0.151137
Chtop	9078	ENSMUSG00000001017	-0.165331	7.7767	3.98372	0.045942	0.151206
Cox7a2	26310	ENSMUSG00000032330	-0.221345	6.59117	3.98289	0.0459646	0.151235
Psmb3	29095	ENSMUSG00000069744	-0.176364	7.60317	3.98	0.0460437	0.151451
Fbxl6	33263	ENSMUSG00000022559	-0.223924	5.6717	3.96813	0.0463693	0.152253
Gm7332	12919	ENSMUSG00000080875	-0.511336	1.15742	3.9638	0.0464887	0.152567
Lclat1	36503	ENSMUSG00000054469	-0.232031	4.49657	3.9588	0.0466268	0.152919
Parvb	33518	ENSMUSG00000022438	-0.198442	7.10425	3.94845	0.0469147	0.153638
Zmiz2	27111	ENSMUSG00000041164	-0.175355	7.56348	3.9435	0.0470529	0.154045
Fbl	17777	ENSMUSG00000046865	-0.154071	8.34782	3.93519	0.0472858	0.154627
Gm15975	13416	ENSMUSG00000083902	-0.517833	1.03763	3.93299	0.0473478	0.154739
Gsdmd	33218	ENSMUSG00000022575	-0.247539	6.37868	3.93348	0.0473339	0.154739
Ppie	11835	ENSMUSG00000028651	-0.214069	5.34451	3.93067	0.047413	0.154893
Tmem208	22970	ENSMUSG00000014856	-0.232503	4.76561	3.92374	0.0476087	0.155455
Got2	22897	ENSMUSG00000031672	-0.153573	8.82114	3.91989	0.0477181	0.155676
Esf1	4676	ENSMUSG00000045624	-0.217133	6.47818	3.91302	0.0479136	0.156222
Cep120	37568	ENSMUSG00000048799	-0.239569	5.06963	3.91149	0.0479571	0.156319
Smarcd3	13067	ENSMUSG00000028949	-0.465892	1.50295	3.90914	0.0480243	0.156492
Polr3g	31024	ENSMUSG00000035834	-0.270165	5.319	3.90261	0.0482112	0.157055
Gm27010	24677	ENSMUSG00000098183	-0.487388	2.00743	3.89872	0.0483229	0.157282
Ptpmt1	3824	ENSMUSG00000063235	-0.220235	5.00909	3.88366	0.0487581	0.158652
Prr33	20069	ENSMUSG00000043795	-0.459999	1.52524	3.87881	0.0488993	0.158926
Ptcd1	14753	ENSMUSG00000029624	-0.278894	4.44174	3.87924	0.0488868	0.158926
2310011J03Rik	20976	ENSMUSG00000020133	-0.229913	5.55309	3.87437	0.0490287	0.159146
Fdps	9006	ENSMUSG00000059743	-0.170618	7.59184	3.87502	0.0490097	0.159146
Ak2	11986	ENSMUSG00000028792	-0.153794	8.32105	3.8695	0.0491711	0.159485
Gnb1	12788	ENSMUSG00000029064	-0.15502	8.80034	3.86492	0.0493056	0.159828
Gm26764	32100	ENSMUSG00000097667	-0.717265	0.307679	3.86152	0.0494055	0.160044
Mcur1	30543	ENSMUSG00000021371	-0.229702	4.88694	3.8612	0.0494151	0.160044
Lpcat3	16468	ENSMUSG00000004270	-0.233869	5.60251	3.85447	0.0496135	0.160594
Ptgs2os2	1413	ENSMUSG00000097754	-0.345603	2.94244	3.85311	0.0496538	0.160678
Rnf34	14313	ENSMUSG00000029474	-0.229594	4.98965	3.85107	0.0497142	0.160827
Hgs	29862	ENSMUSG00000025793	-0.229958	6.37351	3.84378	0.049931	0.161434
Rps6ka2	35070	ENSMUSG00000023809	-0.507252	1.22682	3.83979	0.0500498	0.161772
Zfand5	38386	ENSMUSG00000024750	-0.225022	5.73164	3.83603	0.0501621	0.162041
Chpf2	13066	ENSMUSG00000038181	-0.233015	5.11119	3.8225	0.0505687	0.162978
Rpl34	9752	ENSMUSG00000062006	-0.149017	8.73672	3.81461	0.0508073	0.163652
Gm10288	9901	ENSMUSG00000070343	-0.376784	2.63939	3.80594	0.051071	0.16417
Commd6	24992	ENSMUSG00000075486	-0.239243	4.37564	3.80434	0.05112	0.164281
Rab26os	35399	ENSMUSG00000093565	-0.444371	1.76516	3.79985	0.0512573	0.16456
Uba6	13637	ENSMUSG00000035898	-0.230856	5.22479	3.79957	0.0512657	0.16456
Myadm	16924	ENSMUSG00000068566	-0.16771	7.95944	3.79246	0.0514839	0.165165
Unc119b	14145	ENSMUSG00000046562	-0.222652	4.91617	3.7848	0.0517201	0.16578
Hexim1	29421	ENSMUSG00000048878	-0.19933	6.74439	3.78395	0.0517464	0.165817
Tomm5	10596	ENSMUSG00000078713	-0.191039	6.76736	3.77547	0.0520093	0.16649
Ndufb6	10403	ENSMUSG00000071014	-0.226355	4.81275	3.77224	0.0521097	0.166599
Gas2l3	21179	ENSMUSG00000074802	-0.226549	5.78834	3.77101	0.0521483	0.166675
Ahcyl2	15095	ENSMUSG00000029772	-0.223049	5.26145	3.76351	0.0523825	0.16728
Ammecr1l	37284	ENSMUSG00000041915	-0.22143	4.84408	3.76088	0.052465	0.167495
Nmi	3031	ENSMUSG00000026946	-0.321697	4.2739	3.75739	0.0525745	0.167701
Arhgef2	8985	ENSMUSG00000028059	-0.159344	7.83164	3.7537	0.0526906	0.167928
Banf1	37987	ENSMUSG00000024844	-0.172318	7.57953	3.75035	0.0527964	0.168217
Gdi1	6798	ENSMUSG00000015291	-0.209793	6.18295	3.74634	0.0529233	0.168452
Rpl9	13463	ENSMUSG00000047215	-0.156361	9.52641	3.74394	0.0529995	0.168576
Pbxip1	9040	ENSMUSG00000042613	-0.205697	6.46768	3.74246	0.0530462	0.168676
Traf3ip2	20459	ENSMUSG00000019842	-0.231283	4.28512	3.74065	0.0531039	0.168764
Tmbim6	33740	ENSMUSG00000023010	-0.173614	7.94811	3.74066	0.0531035	0.168764
Igsf6	19642	ENSMUSG00000035004	-0.24834	6.52856	3.7387	0.0531659	0.168913
1500011K16Rik	4459	ENSMUSG00000051319	-0.287694	3.5021	3.73666	0.0532308	0.169071
Sh3gl1	36341	ENSMUSG00000003200	-0.240298	5.49329	3.73178	0.0533863	0.169276
Impact	37178	ENSMUSG00000024423	-0.222538	5.39661	3.73193	0.0533818	0.169276
Rps6kc1	1962	ENSMUSG00000089872	-0.224777	4.49645	3.72823	0.0535001	0.169445
Mapk14	35584	ENSMUSG00000053436	-0.248149	6.78481	3.72651	0.0535552	0.169523
Nkiras2	29281	ENSMUSG00000017837	-0.227706	4.95604	3.72664	0.0535509	0.169523
Tmed5	13959	ENSMUSG00000063406	-0.189131	6.68575	3.72572	0.0535804	0.169555
Rps19bp1	33404	ENSMUSG00000051518	-0.23995	5.08977	3.7222	0.0536937	0.169774
Rps7	31560	ENSMUSG00000061477	-0.146846	9.68626	3.72215	0.0536953	0.169774
Fbxl15	38736	ENSMUSG00000025226	-0.373374	2.3208	3.71856	0.0538109	0.170044
Gm16344	37294	ENSMUSG00000084824	-0.497024	1.09328	3.71724	0.0538535	0.170082
Zfp867	27973	ENSMUSG00000054519	-0.395048	2.06106	3.71517	0.0539203	0.170082
Smn1	31184	ENSMUSG00000021645	-0.209083	6.29216	3.71486	0.0539303	0.170082
2410015M20Rik	36364	ENSMUSG00000049760	-0.2075	5.69506	3.71318	0.0539846	0.170159
Rps27a	27400	ENSMUSG00000020460	-0.155754	9.73607	3.70935	0.0541085	0.170454
Dvl1	12817	ENSMUSG00000029071	-0.212156	5.94632	3.70589	0.0542206	0.170615
Dcp1a	23824	ENSMUSG00000021962	-0.219487	5.59339	3.70537	0.0542376	0.17062
Zfp428	17640	ENSMUSG00000064264	-0.389123	2.3473	3.70409	0.0542791	0.170703
Pcsk7	25776	ENSMUSG00000035382	-0.218823	4.98277	3.69604	0.0545417	0.171336
Pef1	12037	ENSMUSG00000028779	-0.224028	5.32742	3.68496	0.0549052	0.172284
Crtc1	22456	ENSMUSG00000003575	-0.210711	5.32626	3.68511	0.0549004	0.172284
Ube2m	17242	ENSMUSG00000005575	-0.163708	7.6158	3.68359	0.0549506	0.172378
Fcf1	32048	ENSMUSG00000021243	-0.212148	5.86356	3.68165	0.0550142	0.17252
2310057M21Rik	19863	ENSMUSG00000040177	-0.234264	4.3216	3.67957	0.055083	0.172648
Gm13123	12475	ENSMUSG00000083708	-0.390726	1.8739	3.67239	0.0553209	0.173296
Slc7a6os	23017	ENSMUSG00000033106	-0.208958	5.54427	3.67138	0.0553542	0.173352
Snrpd2	17443	ENSMUSG00000040824	-0.211453	6.30625	3.66503	0.0555656	0.173868
Slc35f6	13154	ENSMUSG00000029175	-0.214762	5.69789	3.65825	0.0557924	0.174172
Rpl36a	7646	ENSMUSG00000079435	-0.174757	8.18043	3.6592	0.0557605	0.174172
Psma5	9551	ENSMUSG00000068749	-0.15775	8.09098	3.65793	0.0558029	0.174172
Samd15	32094	ENSMUSG00000090812	-0.501463	0.817068	3.65215	0.0559968	0.174679
Nob1	23049	ENSMUSG00000003848	-0.194745	6.40269	3.65261	0.0559813	0.174679
Map2k4	28148	ENSMUSG00000033352	-0.205042	5.83855	3.63836	0.0564624	0.175988
mt-Tm	39149	ENSMUSG00000064344	-0.531396	0.642295	3.63771	0.0564846	0.176004
Itfg2	16566	ENSMUSG00000001518	-0.230104	4.32068	3.63188	0.0566827	0.176532
Smim13	30519	ENSMUSG00000091264	-0.229163	4.1217	3.6318	0.0566854	0.176532
Fxyd2	25766	ENSMUSG00000059412	-0.164201	8.74587	3.62747	0.0568332	0.176844
Fyttd1	34405	ENSMUSG00000022800	-0.211441	6.17253	3.62533	0.0569064	0.177023
Ube2d3	9789	ENSMUSG00000078578	-0.145789	8.81537	3.62405	0.0569502	0.17711
Fgfr1op	35083	ENSMUSG00000069135	-0.236592	5.2325	3.62022	0.0570815	0.177419
Ipo13	11691	ENSMUSG00000033365	-0.185447	6.71745	3.61083	0.0574046	0.178225
Arpc1a	14749	ENSMUSG00000029621	-0.207819	5.66944	3.60323	0.0576675	0.178843
Snx3	20511	ENSMUSG00000019804	-0.169489	7.49114	3.59992	0.0577824	0.1791
Cyb561d1	9546	ENSMUSG00000048796	-0.247332	3.83217	3.5989	0.0578177	0.17911
Lamtor3	9810	ENSMUSG00000091512	-0.219754	5.03604	3.59181	0.0580649	0.179677
Ankrd33b	32871	ENSMUSG00000022237	-0.320231	2.79167	3.58956	0.0581437	0.179721
2005-03-01	38561	ENSMUSG00000023307	-0.246852	6.28068	3.59031	0.0581173	0.179721
Taf1a	1909	ENSMUSG00000072258	-0.258883	3.77817	3.58895	0.058165	0.179737
Zfp868	22418	ENSMUSG00000060427	-0.231315	4.68469	3.58813	0.0581939	0.179777
Glis1	11447	ENSMUSG00000034762	-0.707357	-0.158035	3.58697	0.0582345	0.179853
Ccdc130	22692	ENSMUSG00000004994	-0.251946	3.80803	3.58622	0.0582606	0.179884
Ptprc	1353	ENSMUSG00000026395	-0.169801	7.27851	3.57967	0.0584909	0.180445
Mrpl35	15826	ENSMUSG00000052962	-0.210585	5.53929	3.57758	0.0585644	0.180622
Slc25a3	21192	ENSMUSG00000061904	-0.155195	8.62904	3.57338	0.0587128	0.180941
Rbm47	13477	ENSMUSG00000070780	-0.278534	4.68216	3.56986	0.0588372	0.181263
Hlx	1916	ENSMUSG00000039377	-0.490302	0.938698	3.56879	0.0588754	0.181283
Sdf2	28606	ENSMUSG00000002064	-0.213496	4.62448	3.55783	0.0592652	0.182331
Zbtb43	2790	ENSMUSG00000026788	-0.223654	4.42795	3.54887	0.0595862	0.183008
Pus7l	33642	ENSMUSG00000033356	-0.218642	5.02566	3.54905	0.0595796	0.183008
Dda1	22505	ENSMUSG00000074247	-0.208353	6.23267	3.53693	0.0600165	0.184026
Lrrfip2	26794	ENSMUSG00000032497	-0.204012	5.83258	3.534	0.0601227	0.184208
Heatr1	30004	ENSMUSG00000050244	-0.178738	6.86218	3.53002	0.0602671	0.184549
Ap2s1	17378	ENSMUSG00000008036	-0.196538	6.92586	3.52841	0.0603256	0.184626
Ktn1	24164	ENSMUSG00000021843	-0.197614	6.05301	3.52671	0.0603873	0.184715
Mvb12a	22510	ENSMUSG00000031813	-0.225779	5.88543	3.52543	0.0604342	0.184767
BC018242	25378	ENSMUSG00000040563	-0.443517	1.3788	3.52311	0.0605187	0.18485
Dnal4	33387	ENSMUSG00000022420	-0.218597	4.54431	3.52278	0.0605308	0.18485
Lsm12	29372	ENSMUSG00000020922	-0.184353	6.78395	3.52395	0.0604881	0.18485
Rps11	18247	ENSMUSG00000003429	-0.156729	9.30155	3.52347	0.0605058	0.18485
Atmin	23164	ENSMUSG00000047388	-0.20693	5.65153	3.52069	0.0606073	0.185002
Dph2	11690	ENSMUSG00000028540	-0.216522	4.92965	3.51823	0.0606974	0.185056
Anks3	33956	ENSMUSG00000022515	-0.216065	4.62884	3.51852	0.0606866	0.185056
Pde2a	19136	ENSMUSG00000030653	-0.177859	7.48642	3.51895	0.0606708	0.185056
Cox4i1	23223	ENSMUSG00000031818	-0.151619	8.44167	3.51902	0.0606684	0.185056
Rnasel	1454	ENSMUSG00000066800	-0.323622	2.84239	3.51639	0.0607647	0.18516
Rpl19	29116	ENSMUSG00000017404	-0.143114	9.99676	3.51335	0.0608762	0.185449
Lrrc41	11609	ENSMUSG00000028703	-0.222208	5.87082	3.50629	0.061136	0.18619
Trim3	19372	ENSMUSG00000036989	-0.213534	4.67272	3.50161	0.0613094	0.186667
Lonrf1	22173	ENSMUSG00000039633	-0.273899	3.27289	3.49867	0.0614181	0.186947
Tacc2	19851	ENSMUSG00000030852	-0.22472	5.42519	3.49462	0.0615687	0.187297
Vcpkmt	31832	ENSMUSG00000049882	-0.215929	5.24131	3.49313	0.0616239	0.187319
Rfesd	30993	ENSMUSG00000043190	-0.308319	2.8123	3.4834	0.0619872	0.188218
Gm15920	14437	ENSMUSG00000080893	-0.270295	3.98467	3.47798	0.0621905	0.188589
Srprb	26550	ENSMUSG00000032553	-0.208912	5.34871	3.47757	0.062206	0.188589
Stip1	38099	ENSMUSG00000024966	-0.145176	8.39087	3.47744	0.0622107	0.188589
Blvrb	17748	ENSMUSG00000040466	-0.199186	6.44041	3.47665	0.0622406	0.188629
Fars2	30483	ENSMUSG00000021420	-0.219423	4.56662	3.47454	0.0623202	0.188768
Pea15a	1741	ENSMUSG00000013698	-0.21643	5.06597	3.47278	0.0623864	0.188866
Leng8	16962	ENSMUSG00000035545	-0.171217	7.32376	3.47069	0.0624653	0.188988
Phb	28996	ENSMUSG00000038845	-0.153671	7.62301	3.47037	0.0624774	0.188988
Rpsa	26899	ENSMUSG00000032518	-0.142602	11.3292	3.46547	0.0626629	0.189446
Stra13	29889	ENSMUSG00000025144	-0.226227	5.12638	3.46423	0.0627095	0.189536
Rps25	25727	ENSMUSG00000009927	-0.160558	9.28241	3.46336	0.0627428	0.189585
Rps2-ps10	37645	ENSMUSG00000091957	-0.161116	9.12554	3.45845	0.0629292	0.190046
Blmh	28553	ENSMUSG00000020840	-0.181198	6.74551	3.4554	0.0630456	0.190346
Gm15772	12854	ENSMUSG00000062353	-0.159456	9.28751	3.45411	0.0630947	0.190443
1600020E01Rik	15994	ENSMUSG00000097048	-0.298736	2.9485	3.44906	0.0632878	0.190819
Tcf25	23310	ENSMUSG00000001472	-0.148359	8.02127	3.44098	0.0635978	0.191599
Wnt10b	33711	ENSMUSG00000022996	-0.667012	0.364078	3.43481	0.0638359	0.192186
Znhit1	14541	ENSMUSG00000059518	-0.206867	5.6595	3.43521	0.0638206	0.192186
2410131K14Rik	14220	ENSMUSG00000032840	-0.223447	4.44473	3.4322	0.0639371	0.192362
Gm15764	34174	ENSMUSG00000087556	-0.589593	-0.0144172	3.43143	0.0639666	0.192399
Stab1	23848	ENSMUSG00000042286	-0.252255	3.78085	3.42846	0.0640819	0.192642
Dcun1d3	19615	ENSMUSG00000048787	-0.275004	3.35569	3.42722	0.0641298	0.192707
Sub1	32801	ENSMUSG00000022205	-0.186977	6.58196	3.41678	0.0645369	0.193838
Ndufa3	16933	ENSMUSG00000035674	-0.231324	5.23889	3.40881	0.0648492	0.194635
Fbrs	19785	ENSMUSG00000042423	-0.182202	6.68966	3.40732	0.0649078	0.194758
2810025M15Rik	1497	ENSMUSG00000049881	-0.208846	4.95997	3.40242	0.0651009	0.195285
Bzrap1	28862	ENSMUSG00000034156	-0.337701	2.56784	3.40154	0.0651356	0.195337
Rcl1	38462	ENSMUSG00000024785	-0.200151	5.84949	3.40084	0.0651631	0.195367
Tmem63b	36188	ENSMUSG00000036026	-0.217372	4.51203	3.39703	0.0653137	0.195766
Qsox2	2534	ENSMUSG00000036327	-0.215991	5.82023	3.39229	0.0655017	0.196172
Gm4604	16203	ENSMUSG00000091845	-0.526931	0.999621	3.39101	0.0655526	0.196219
Alkbh3	3911	ENSMUSG00000040174	-0.217607	5.15227	3.39119	0.0655455	0.196219
Ccdc124	22485	ENSMUSG00000007721	-0.210984	5.87621	3.38668	0.0657252	0.196683
null	9057	ENSMUSG00000078667	-0.277758	3.20238	3.38288	0.0658769	0.197031
Prl8a1	30353	ENSMUSG00000019756	-0.500475	1.08453	3.3817	0.0659242	0.197067
Pstpip1	25912	ENSMUSG00000032322	-0.365342	6.41703	3.38087	0.0659573	0.197114
4833439L19Rik	30663	ENSMUSG00000025871	-0.186932	6.61266	3.37922	0.0660232	0.197212
Mrps18a	36194	ENSMUSG00000023967	-0.217491	5.91202	3.36756	0.066492	0.198287
Ran	14409	ENSMUSG00000029430	-0.13825	9.83231	3.35747	0.0669009	0.199241
Alkbh6	17875	ENSMUSG00000042831	-0.242213	4.25233	3.35687	0.0669253	0.19926
Gm10275	20398	ENSMUSG00000069682	-0.243185	4.92853	3.35068	0.0671774	0.199958
null	35938	ENSMUSG00000078821	-0.601693	0.55603	3.34939	0.0672298	0.199984
Utp11l	11876	ENSMUSG00000028907	-0.178586	7.04664	3.34996	0.0672065	0.199984
Dmxl2	25883	ENSMUSG00000041268	-0.211794	4.66426	3.34218	0.0675253	0.200619
6230400D17Rik	23721	ENSMUSG00000097577	-0.480636	0.933663	3.3416	0.0675491	0.200637
Lysmd1	9225	ENSMUSG00000053769	-0.340387	2.34741	3.33539	0.0678042	0.201181
Gm12174	27617	ENSMUSG00000080776	-0.564261	0.688425	3.32974	0.0680377	0.201713
Il18rap	335	ENSMUSG00000026068	-0.209118	5.59853	3.32805	0.0681076	0.201766
Dcun1d2	21840	ENSMUSG00000038506	-0.208934	5.19213	3.32522	0.068225	0.201947
Aftph	27264	ENSMUSG00000049659	-0.207218	6.25629	3.32436	0.0682606	0.201999
Zfp691	11743	ENSMUSG00000045268	-0.258358	3.44476	3.32142	0.0683829	0.2022
Atg4b	995	ENSMUSG00000026280	-0.201631	5.60933	3.31988	0.068447	0.202336
Ccdc25	24750	ENSMUSG00000022035	-0.201436	5.39267	3.31397	0.0686932	0.202956
Abi2	515	ENSMUSG00000026782	-0.2541	5.20265	3.30964	0.0688747	0.203331
Pdcd11	38759	ENSMUSG00000025047	-0.165645	7.05129	3.30832	0.06893	0.203396
Mlkl	23116	ENSMUSG00000012519	-0.326886	3.61954	3.30756	0.0689618	0.203427
Top1mt	33211	ENSMUSG00000000934	-0.219485	4.50926	3.30626	0.0690165	0.203535
Pqlc2	12327	ENSMUSG00000028744	-0.328781	2.47208	3.30357	0.0691295	0.203761
2210013O21Rik	8048	ENSMUSG00000086316	-0.278927	3.72914	3.30041	0.0692628	0.20402
Sssca1	38017	ENSMUSG00000079478	-0.212165	4.53201	3.29842	0.0693466	0.204078
D17Wsu104e	36350	ENSMUSG00000019579	-0.177865	6.75912	3.29796	0.0693658	0.20408
Chpf	731	ENSMUSG00000032997	-0.233761	4.9017	3.29589	0.0694533	0.204156
Unc13a	22517	ENSMUSG00000034799	-0.308813	2.65405	3.29379	0.0695423	0.204224
Ip6k1	26672	ENSMUSG00000032594	-0.23619	4.92196	3.29425	0.0695228	0.204224
Rpl8	33285	ENSMUSG00000003970	-0.137264	10.6774	3.29401	0.0695328	0.204224
Gm2000	1485	ENSMUSG00000078193	-0.467347	2.14974	3.29332	0.0695621	0.204228
Eif4e2	867	ENSMUSG00000026254	-0.164357	7.32538	3.29039	0.0696866	0.204432
Bcl2l2	24513	ENSMUSG00000089682	-0.231315	4.53898	3.28808	0.0697845	0.204558
Prkab2	9345	ENSMUSG00000038205	-0.217709	4.20179	3.28717	0.0698232	0.204601
Gm26549	35666	ENSMUSG00000097217	-0.568575	0.110677	3.28103	0.0700849	0.204955
Drg2	28013	ENSMUSG00000020537	-0.184133	6.67264	3.27908	0.0701684	0.205096
Atp6v1e1	16376	ENSMUSG00000019210	-0.194109	6.20369	3.27042	0.0705396	0.205855
Capns1	17867	ENSMUSG00000001794	-0.15225	7.83698	3.27041	0.07054	0.205855
Rfx1	22674	ENSMUSG00000031706	-0.23649	4.74164	3.26689	0.0706915	0.20619
Txndc17	28381	ENSMUSG00000020803	-0.188556	6.33732	3.26489	0.0707778	0.206334
1810043H04Rik	29842	ENSMUSG00000078572	-0.269167	3.41029	3.25536	0.0711905	0.207159
Rps18-ps3	23046	ENSMUSG00000057657	-0.721468	0.27516	3.25466	0.0712206	0.207192
Pias4	21031	ENSMUSG00000004934	-0.212047	5.07787	3.25269	0.0713062	0.207387
Dennd2d	9496	ENSMUSG00000027901	-0.224801	4.4262	3.25073	0.0713915	0.207473
Gm11772	29849	ENSMUSG00000085501	-0.457694	1.44888	3.24969	0.0714372	0.207542
Aph1a	9266	ENSMUSG00000015750	-0.184087	6.59277	3.23953	0.0718814	0.208491
Mrpl54	21041	ENSMUSG00000034932	-0.193469	5.85359	3.23529	0.0720675	0.208787
Slc25a5	6181	ENSMUSG00000016319	-0.13531	9.60166	3.23341	0.0721504	0.208891
Psmg4	30464	ENSMUSG00000071451	-0.221426	4.10042	3.22453	0.0725427	0.209728
Rps27	9063	ENSMUSG00000090733	-0.257479	6.35414	3.22298	0.0726114	0.209819
Zwint	20774	ENSMUSG00000019923	-0.173458	6.70495	3.22313	0.0726045	0.209819
Araf	6006	ENSMUSG00000001127	-0.192458	6.43431	3.22016	0.0727366	0.210071
Nxf1	38148	ENSMUSG00000010097	-0.154506	7.53044	3.20866	0.0732496	0.211171
Olfr933	25605	ENSMUSG00000058515	-0.373073	2.03298	3.20478	0.0734235	0.211509
Wdr12	510	ENSMUSG00000026019	-0.17012	7.06595	3.19239	0.073982	0.213008
Psmb9	35762	ENSMUSG00000096727	-0.410734	3.29939	3.18913	0.0741294	0.21327
Zfp451	234	ENSMUSG00000042197	-0.196785	6.15815	3.18804	0.0741789	0.213355
Ssbp1	15258	ENSMUSG00000029911	-0.167967	6.85676	3.1812	0.0744901	0.214085
Ctu1	18159	ENSMUSG00000038888	-0.263538	4.02716	3.17997	0.0745463	0.214191
Ccdc12	26773	ENSMUSG00000019659	-0.204461	5.78669	3.17574	0.0747392	0.214635
Sap30bp	29700	ENSMUSG00000020755	-0.1933	5.81073	3.17432	0.0748042	0.214693
S100a11	9162	ENSMUSG00000027907	-0.138697	8.80343	3.16985	0.0750093	0.215079
Tpst2	14064	ENSMUSG00000029344	-0.204461	5.80991	3.16356	0.0752986	0.215854
Gtf2f1	36382	ENSMUSG00000002658	-0.166493	7.21673	3.15901	0.0755089	0.216322
Dnajc25	10818	ENSMUSG00000070972	-0.249667	4.00572	3.15348	0.0757653	0.216913
Sec14l1	29759	ENSMUSG00000020823	-0.226037	5.74738	3.14961	0.0759451	0.217372
Stap2	36338	ENSMUSG00000038781	-0.557172	0.112098	3.14465	0.0761764	0.217923
Trp53inp2	5003	ENSMUSG00000038375	-0.335724	2.89498	3.14336	0.0762368	0.217978
Gm8430	16402	ENSMUSG00000055093	-0.398654	2.84814	3.14133	0.0763314	0.218087
Trip12	796	ENSMUSG00000026219	-0.139691	8.1301	3.13734	0.0765187	0.218399
9930104L06Rik	11894	ENSMUSG00000044730	-0.223399	4.24016	3.13683	0.0765423	0.21841
Gm22620	25236	ENSMUSG00000064634	-0.418226	1.89993	3.13179	0.0767794	0.218919
Sdhaf2	38201	ENSMUSG00000024668	-0.18873	5.71764	3.13137	0.0767992	0.21892
Immp1l	4046	ENSMUSG00000042670	-0.210538	4.27663	3.12968	0.0768788	0.219091
Cops5	60	ENSMUSG00000025917	-0.183509	6.38881	3.11506	0.0775717	0.220587
Arf1	27965	ENSMUSG00000048076	-0.133108	9.18846	3.11096	0.0777672	0.221059
Azi2	26857	ENSMUSG00000039285	-0.201594	5.74752	3.10849	0.0778849	0.221337
Fam208b	29944	ENSMUSG00000033799	-0.192478	5.70648	3.09693	0.07844	0.222575
Dpcd	38715	ENSMUSG00000041035	-0.2178	4.16379	3.09503	0.0785318	0.222723
Mettl16	28485	ENSMUSG00000010554	-0.196934	6.37455	3.09225	0.0786659	0.22299
Clec4a1	16422	ENSMUSG00000049037	-0.617758	1.29466	3.09155	0.0787	0.22303
Gm16702	35090	ENSMUSG00000097796	-0.344209	2.34259	3.08925	0.078811	0.223288
Slc16a3	29902	ENSMUSG00000025161	-0.162753	7.4682	3.0829	0.0791193	0.224048
Mn1	14051	ENSMUSG00000070576	-0.560719	0.553261	3.08058	0.0792325	0.224311
Gm9855	20504	ENSMUSG00000085666	-0.181516	6.38394	3.07883	0.0793175	0.224495
Gm11613	29089	ENSMUSG00000085586	-0.372978	1.78379	3.07663	0.0794249	0.224701
Tmem199	28623	ENSMUSG00000051232	-0.198212	5.98058	3.07628	0.0794422	0.224701
Amz2	29576	ENSMUSG00000020610	-0.211858	5.19176	3.07546	0.0794819	0.224733
Rnf135	28674	ENSMUSG00000020707	-0.254728	3.34475	3.07165	0.0796684	0.225009
Ncln	21061	ENSMUSG00000020238	-0.169454	7.55026	3.07296	0.0796045	0.225009
Yam1	36121	ENSMUSG00000098178	-0.192161	9.08489	3.0693	0.0797837	0.225225
Srp14	4232	ENSMUSG00000009549	-0.175383	6.58589	3.06903	0.0797971	0.225225
Rsph3a	35079	ENSMUSG00000073471	-0.339869	2.21045	3.06593	0.0799494	0.225484
Polr2c	22867	ENSMUSG00000031783	-0.18172	6.37951	3.06624	0.0799342	0.225484
Pycrl	33223	ENSMUSG00000022571	-0.217649	5.34309	3.06013	0.0802352	0.226005
Amn1	16903	ENSMUSG00000068250	-0.381243	1.68814	3.05307	0.0805846	0.226704
Ercc2	17459	ENSMUSG00000030400	-0.204312	5.00436	3.04742	0.0808655	0.227296
Rdh11	31949	ENSMUSG00000066441	-0.194666	4.97362	3.04082	0.0811947	0.227882
Pgam1	38634	ENSMUSG00000011752	-0.135267	8.37549	3.03989	0.0812416	0.227891
AI846148	38110	ENSMUSG00000024970	-0.233304	3.74176	3.03566	0.0814534	0.228286
Mcts1	6261	ENSMUSG00000000355	-0.19453	5.26706	3.03204	0.0816351	0.22868
Gm17494	9671	ENSMUSG00000057359	-0.454894	1.14953	3.03077	0.0816992	0.228803
Ctsc	18971	ENSMUSG00000030560	-0.168795	6.76035	3.03001	0.0817375	0.228853
Ier5	1467	ENSMUSG00000056708	-0.193411	5.48886	3.02481	0.0819997	0.229414
Dhx32	19893	ENSMUSG00000030986	-0.195718	5.00497	3.02202	0.082141	0.22958
Clpb	19141	ENSMUSG00000001829	-0.187855	6.18675	3.01939	0.0822746	0.229838
Ncdn	11941	ENSMUSG00000028833	-0.177575	6.43698	3.01739	0.0823757	0.230006
Nr2f6	22499	ENSMUSG00000002393	-0.263112	4.08093	3.01686	0.0824027	0.230024
Kif3b	4945	ENSMUSG00000027475	-0.197532	4.6467	3.01273	0.0826133	0.230496
Gpatch4	8950	ENSMUSG00000028069	-0.149718	7.48559	3.01022	0.0827408	0.230795
Gabarap	28291	ENSMUSG00000018567	-0.166771	7.59587	3.00921	0.0827929	0.230825
Fam63a	9237	ENSMUSG00000038712	-0.215825	5.27122	3.00479	0.0830186	0.231281
Eif4a-ps4	522	ENSMUSG00000082209	-0.24158	5.83659	3.00384	0.0830677	0.231302
Gm4540	9490	ENSMUSG00000092072	-0.233262	4.37247	2.99977	0.0832763	0.231813
Rpl6	14264	ENSMUSG00000029614	-0.132126	10.2802	2.99946	0.0832925	0.231813
Clec11a	18198	ENSMUSG00000004473	-0.517076	0.257579	2.99625	0.0834573	0.232156
Uqcr11	20986	ENSMUSG00000020163	-0.181866	6.17495	2.98468	0.0840558	0.233125
Appbp2	28794	ENSMUSG00000018481	-0.178631	6.35186	2.98412	0.0840852	0.233148
Dnase1	33931	ENSMUSG00000005980	-0.374628	1.93695	2.9822	0.0841847	0.233308
Cpeb3	38557	ENSMUSG00000039652	-0.424345	1.35313	2.97767	0.0844209	0.233798
Zbtb40	12264	ENSMUSG00000060862	-0.207675	4.33407	2.9764	0.0844868	0.233798
Gemin5	27894	ENSMUSG00000037275	-0.178791	6.3981	2.97646	0.084484	0.233798
S100a10	9163	ENSMUSG00000041959	-0.132245	9.04755	2.9774	0.0844348	0.233798
Xpo6	19697	ENSMUSG00000000131	-0.190751	6.91135	2.97557	0.0845305	0.233861
Sirt4	14165	ENSMUSG00000029524	-0.264082	3.0731	2.97044	0.0847989	0.234545
Ccm2	27125	ENSMUSG00000000378	-0.209809	4.77038	2.96241	0.0852207	0.235479
Ccdc59	21338	ENSMUSG00000019897	-0.190306	5.66879	2.96304	0.0851878	0.235479
Vamp3	12703	ENSMUSG00000028955	-0.189799	6.05738	2.95842	0.0854313	0.235886
Actr10	31857	ENSMUSG00000021076	-0.186381	5.97433	2.95594	0.0855627	0.236132
2310047M10Rik	28211	ENSMUSG00000045176	-0.254317	3.28291	2.95243	0.0857487	0.236301
1810055G02Rik	37902	ENSMUSG00000035372	-0.18797	5.37492	2.95225	0.0857578	0.236301
Bmp2k	13804	ENSMUSG00000034663	-0.190443	5.42271	2.95056	0.0858477	0.236393
Ddx39b	35874	ENSMUSG00000019432	-0.146637	8.59634	2.95063	0.0858443	0.236393
Rbm19	14233	ENSMUSG00000029594	-0.185442	5.68774	2.94921	0.0859197	0.236533
Nop2	16504	ENSMUSG00000038279	-0.133847	8.25978	2.94875	0.0859439	0.236542
Atp13a1	22424	ENSMUSG00000031862	-0.184082	6.82516	2.94551	0.0861166	0.236872
Trim11	27955	ENSMUSG00000020455	-0.194434	5.21359	2.94371	0.0862124	0.237047
Arhgdib	16755	ENSMUSG00000030220	-0.133453	9.45871	2.94267	0.086268	0.237141
Picalm	18994	ENSMUSG00000039361	-0.13602	8.14811	2.92465	0.087236	0.239567
Cxcr5	25735	ENSMUSG00000047880	-0.367744	1.69957	2.91712	0.0876441	0.24051
Bin3	24823	ENSMUSG00000022089	-0.190368	6.80751	2.91731	0.0876336	0.24051
Kmt2b	17899	ENSMUSG00000006307	-0.166756	6.72789	2.91479	0.0877707	0.24079
Txn2	33311	ENSMUSG00000005354	-0.159659	7.2312	2.90905	0.0880837	0.241479
Mtg2	5588	ENSMUSG00000039069	-0.198207	4.70563	2.90609	0.0882454	0.241745
Ebna1bp2	11712	ENSMUSG00000028729	-0.143776	7.55438	2.90633	0.0882326	0.241745
Tmem198	733	ENSMUSG00000051703	-0.408972	1.29347	2.90532	0.0882876	0.241759
Slc26a10	21514	ENSMUSG00000040441	-0.359704	1.99459	2.90453	0.0883312	0.241759
Ccdc126	15449	ENSMUSG00000050786	-0.31367	2.61305	2.90519	0.0882947	0.241759
Cisd3	29093	ENSMUSG00000078695	-0.209559	4.22982	2.9013	0.0885083	0.242109
Fam219a	10449	ENSMUSG00000028439	-0.340138	2.05881	2.90089	0.0885306	0.242111
Smcr8	28039	ENSMUSG00000049323	-0.170983	6.60604	2.89886	0.0886424	0.242298
Tnpo2	22724	ENSMUSG00000031691	-0.171591	6.69206	2.89842	0.0886664	0.242304
Atf6b	35803	ENSMUSG00000015461	-0.161512	7.41673	2.89801	0.0886888	0.242306
Toporsos	10402	ENSMUSG00000028407	-0.507291	0.19866	2.89666	0.0887631	0.242423
Orai2	14528	ENSMUSG00000039747	-0.183355	6.12885	2.89527	0.0888401	0.242423
Nomo1	18322	ENSMUSG00000030835	-0.135627	8.0866	2.89571	0.0888155	0.242423
Eif3e	32982	ENSMUSG00000022336	-0.134945	8.08028	2.89547	0.088829	0.242423
Abt1	30246	ENSMUSG00000036376	-0.205331	4.77335	2.89313	0.0889582	0.242627
Snrpb	4521	ENSMUSG00000027404	-0.136336	8.4442	2.89112	0.0890688	0.242869
Prdm11	3889	ENSMUSG00000075028	-0.554456	0.824384	2.88955	0.0891559	0.243048
Dhrs9	3218	ENSMUSG00000027068	-0.234689	6.05612	2.88348	0.0894922	0.243667
U2af2	17019	ENSMUSG00000030435	-0.129919	8.70467	2.88357	0.0894876	0.243667
Bend6	236	ENSMUSG00000042182	-0.379193	2.05606	2.88238	0.0895538	0.243716
[truncated: 9,178 more rows]

## Sheet: WT LipidA Response
gene	order	genes	logFC	logCPM	LR	PValue	FDR
Il1b	4504	ENSMUSG00000027398	-10.4661	5.51456	818.776	4.4647e-180	5.01832e-176
Il1a	4501	ENSMUSG00000027399	-9.68002	4.37403	611.119	6.38893e-135	3.59058e-131
Cxcl2	13716	ENSMUSG00000058427	-6.49434	7.02673	519.186	6.36169e-115	2.38351e-111
Csf3	29152	ENSMUSG00000038067	-8.42646	2.6901	306.594	1.20581e-68	3.38834e-65
Fas	38522	ENSMUSG00000024778	-4.59959	3.46447	256.482	1.00319e-57	2.25516e-54
Tnf	35868	ENSMUSG00000024401	-2.76269	8.46191	248.446	5.66585e-56	1.0614e-52
Cd83	30545	ENSMUSG00000015396	-3.82003	3.99865	226.021	4.39727e-51	7.06076e-48
Irg1	25002	ENSMUSG00000022126	-5.99667	9.13741	218.747	1.69736e-49	2.38479e-46
Col5a3	25319	ENSMUSG00000004098	-6.13954	4.87813	211.244	7.35198e-48	9.18181e-45
Ccl4	28753	ENSMUSG00000018930	-4.36349	7.71045	204.691	1.97839e-46	2.02156e-43
Gm12840	11679	ENSMUSG00000086320	-3.36217	4.64423	204.699	1.96995e-46	2.02156e-43
Lilrb4	20568	ENSMUSG00000062593	-2.30911	8.20707	200.088	1.99855e-45	1.87198e-42
Tnfaip3	20267	ENSMUSG00000019850	-3.39862	4.19871	185.518	3.02515e-42	2.61559e-39
Gp49a	20567	ENSMUSG00000089672	-2.77238	7.32005	181.389	2.41123e-41	1.93587e-38
Gpr84	33895	ENSMUSG00000063234	-2.51615	7.66275	172.901	1.7206e-39	1.2893e-36
Mmp14	24490	ENSMUSG00000000957	-9.63925	1.02302	170.976	4.52813e-39	3.18101e-36
Pde4b	11370	ENSMUSG00000028525	-2.78302	3.99589	162.609	3.04484e-37	2.01318e-34
Ccl22	22861	ENSMUSG00000031779	-6.37964	4.33607	161.18	6.24837e-37	3.90176e-34
Ier3	35915	ENSMUSG00000003541	-2.31746	6.90401	154.528	1.77522e-35	1.05018e-32
Kctd12	24998	ENSMUSG00000098557	-2.45645	5.74379	146.647	9.37498e-34	5.26874e-31
null	17668	ENSMUSG00000098495	-2.49303	4.14156	142.529	7.45247e-33	3.98885e-30
Plet1	25820	ENSMUSG00000032068	-3.98761	2.76446	142.098	9.25792e-33	4.72996e-30
Ccrl2	26791	ENSMUSG00000043953	-5.41363	1.8274	140.119	2.50716e-32	1.22524e-29
Flrt3	4683	ENSMUSG00000051379	-4.44699	1.94415	138.215	6.53853e-32	3.06221e-29
Lif	27049	ENSMUSG00000034394	-7.14464	6.15191	137.192	1.0945e-31	4.92086e-29
Timp1	6012	ENSMUSG00000001131	-4.67567	3.20402	133.727	6.27044e-31	2.71076e-28
Gm26809	15006	ENSMUSG00000097815	-2.26878	7.84754	124.975	5.1535e-29	2.14538e-26
Slc7a11	8606	ENSMUSG00000027737	-1.97857	7.37919	122.88	1.48146e-28	5.947e-26
P2rx5	28415	ENSMUSG00000005950	-3.63578	2.46788	115.209	7.08077e-27	2.74441e-24
Il4i1	18223	ENSMUSG00000074141	-3.78677	4.1376	114.154	1.20552e-26	4.51669e-24
Pou2f2	17670	ENSMUSG00000008496	-2.43561	4.75243	111.657	4.24696e-26	1.53987e-23
Pdgfb	33393	ENSMUSG00000000489	-2.3472	8.17176	110.341	8.24997e-26	2.80999e-23
Ptgs2	1412	ENSMUSG00000032487	-1.83773	8.78853	110.164	9.02226e-26	2.98265e-23
Ikbke	1207	ENSMUSG00000042349	-2.94027	6.69662	109.71	1.13456e-25	3.64354e-23
null	17669	ENSMUSG00000099297	-2.4814	5.4252	109.212	1.45794e-25	4.55201e-23
Serpinb6b	30427	ENSMUSG00000042842	-2.40453	3.41338	105.871	7.8703e-25	2.39087e-22
Tpbg	26362	ENSMUSG00000035274	-5.00589	1.42619	102.592	4.1177e-24	1.21797e-21
Traf1	2819	ENSMUSG00000026875	-2.61373	6.24208	99.218	2.26186e-23	6.51881e-21
Src	5091	ENSMUSG00000027646	-3.74354	3.2683	96.9202	7.21798e-23	2.02825e-20
Gadd45b	21019	ENSMUSG00000015312	-2.58958	5.23922	92.8077	5.76307e-22	1.57993e-19
Ccl3	28752	ENSMUSG00000000982	-3.6086	9.47786	92.7074	6.06271e-22	1.6225e-19
Egr1	37345	ENSMUSG00000038418	-2.23738	3.86741	90.6046	1.75452e-21	4.58623e-19
Socs3	29785	ENSMUSG00000053113	-2.40165	7.17268	89.4618	3.12616e-21	7.98591e-19
Cd40	5275	ENSMUSG00000017652	-3.80673	3.86378	88.4065	5.32964e-21	1.33123e-18
Gpr132	32513	ENSMUSG00000021298	-2.81815	2.05491	88.2867	5.66219e-21	1.38354e-18
Mmp9	5271	ENSMUSG00000017737	-3.54789	2.67475	87.5559	8.19331e-21	1.95942e-18
Dusp5	38802	ENSMUSG00000034765	-2.40211	6.00679	86.8744	1.15634e-20	2.70777e-18
Nfkbiz	34659	ENSMUSG00000035356	-2.17057	4.85679	86.2651	1.57364e-20	3.60973e-18
Ahnak2	32510	ENSMUSG00000072812	-2.54153	4.19441	84.8499	3.21904e-20	7.23639e-18
Lrrc16a	30298	ENSMUSG00000021338	-1.85695	3.745	84.6898	3.49049e-20	7.69277e-18
Nes	8947	ENSMUSG00000004891	-2.18337	3.57394	83.8661	5.29456e-20	1.14444e-17
Ksr2	14208	ENSMUSG00000061578	-3.14775	2.19693	83.3821	6.76324e-20	1.43432e-17
Phlda1	21371	ENSMUSG00000020205	-2.9105	4.48744	83.2401	7.26671e-20	1.51255e-17
Cdc42ep2	38033	ENSMUSG00000045664	-2.96294	2.38546	81.6883	1.5933e-19	3.25613e-17
Nfkbie	36180	ENSMUSG00000023947	-2.27769	5.12994	80.6109	2.74846e-19	5.51656e-17
Olr1	16606	ENSMUSG00000030162	-1.63258	4.49621	80.4912	2.92001e-19	5.75806e-17
Clec4e	16432	ENSMUSG00000030142	-1.61482	8.45471	80.4216	3.0247e-19	5.86166e-17
Il13ra2	7907	ENSMUSG00000031289	-3.33743	1.69612	80.2293	3.33391e-19	6.35137e-17
Saa3	18334	ENSMUSG00000040026	-3.64102	1.32432	80.1443	3.48037e-19	6.51989e-17
Itga5	33897	ENSMUSG00000000555	-1.53897	9.4927	79.0083	6.18508e-19	1.13968e-16
Slfn2	28727	ENSMUSG00000072620	-2.24639	7.9833	78.3933	8.44387e-19	1.53079e-16
Tnfaip2	32475	ENSMUSG00000021281	-2.70909	7.60894	78.32	8.7628e-19	1.56339e-16
Jdp2	32063	ENSMUSG00000034271	-2.32288	7.55474	78.2526	9.06733e-19	1.56795e-16
Lpar1	10807	ENSMUSG00000038668	-2.02097	4.23403	78.2541	9.06027e-19	1.56795e-16
Zc3h12a	11903	ENSMUSG00000042677	-1.80205	5.75692	77.173	1.56619e-18	2.66727e-16
Myc	33094	ENSMUSG00000022346	-2.33518	5.77394	76.1801	2.58935e-18	4.34393e-16
Pdpn	12430	ENSMUSG00000028583	-3.8504	1.69441	75.9025	2.98023e-18	4.92615e-16
Xirp1	26896	ENSMUSG00000079243	-2.56995	5.61832	75.7714	3.18486e-18	5.18809e-16
Nfkb1	9793	ENSMUSG00000028163	-1.83197	8.34714	74.7347	5.3841e-18	8.64533e-16
C3	36394	ENSMUSG00000024164	-1.86327	3.36433	74.1638	7.18968e-18	1.1382e-15
Tmem171	31165	ENSMUSG00000052485	-2.01833	3.92925	72.8774	1.37958e-17	2.15368e-15
Igsf3	9412	ENSMUSG00000042035	-1.67121	4.74132	72.3188	1.83094e-17	2.81915e-15
Slc6a4	28555	ENSMUSG00000020838	-2.573	2.40245	71.9423	2.21581e-17	3.36564e-15
Vegfa	36193	ENSMUSG00000023951	-1.63141	4.56804	71.1141	3.37147e-17	5.0527e-15
Cpd	28551	ENSMUSG00000020841	-1.32513	8.61727	70.3829	4.88425e-17	7.22356e-15
Slc26a9	1215	ENSMUSG00000042268	-3.2843	1.388	70.0932	5.65688e-17	8.25757e-15
Ccl5	28747	ENSMUSG00000035042	-5.50615	4.45426	68.8903	1.04098e-16	1.50008e-14
Bcl6b	28304	ENSMUSG00000000317	-3.14396	2.13476	68.3044	1.40108e-16	1.99343e-14
Sh2d5	12295	ENSMUSG00000045349	-1.8479	4.28136	68.0325	1.60825e-16	2.25959e-14
Tnc	10941	ENSMUSG00000028364	-3.64825	4.81879	67.781	1.82704e-16	2.5353e-14
Serpine1	14548	ENSMUSG00000037411	-1.35813	8.52845	66.351	3.77373e-16	5.17277e-14
Slc31a2	10896	ENSMUSG00000066152	-1.63166	4.13587	65.9156	4.70658e-16	6.37373e-14
Rab11fip1	22102	ENSMUSG00000031488	-1.52164	5.41548	65.5318	5.7185e-16	7.65189e-14
Slc4a7	23665	ENSMUSG00000021733	-1.35872	7.28833	65.3473	6.27968e-16	8.30395e-14
Rgs16	1453	ENSMUSG00000026475	-1.97058	8.3457	64.0541	1.21052e-15	1.58212e-13
Tmem2	38391	ENSMUSG00000024754	-1.63388	4.68118	64.0259	1.22794e-15	1.58644e-13
Tnip1	27843	ENSMUSG00000020400	-1.72574	7.87561	63.6311	1.50044e-15	1.91647e-13
Nfkbia	31732	ENSMUSG00000021025	-1.5386	7.582	63.5574	1.55762e-15	1.96715e-13
2500002B13Rik	22321	ENSMUSG00000096917	-2.49293	2.75737	63.3529	1.72798e-15	2.15806e-13
Nlrp3	27978	ENSMUSG00000032691	-1.57099	7.1693	62.6625	2.45339e-15	3.03034e-13
Gfod1	30538	ENSMUSG00000051335	-1.63244	6.22775	60.7195	6.5816e-15	8.041e-13
Sdc4	5229	ENSMUSG00000017009	-1.6814	8.27717	60.6268	6.89898e-15	8.33812e-13
Hcar2	14348	ENSMUSG00000045502	-2.39936	3.77508	60.287	8.19853e-15	9.80335e-13
2010300C02Rik	290	ENSMUSG00000026090	-4.036	1.02595	59.7963	1.052e-14	1.24468e-12
Kdm6b	28237	ENSMUSG00000018476	-2.03518	6.35949	59.3015	1.35272e-14	1.58381e-12
Ccl9	28748	ENSMUSG00000019122	-1.7371	9.3568	58.8994	1.65944e-14	1.9229e-12
Zyx	15345	ENSMUSG00000029860	-1.61339	6.09046	58.3962	2.143e-14	2.45789e-12
Pim1	35613	ENSMUSG00000024014	-2.33582	4.64983	54.3045	1.71704e-13	1.92995e-11
Dst	237	ENSMUSG00000026131	-1.35419	7.21733	53.9631	2.04286e-13	2.27344e-11
Il27	19719	ENSMUSG00000044701	-3.44012	2.6564	53.4436	2.66125e-13	2.9326e-11
Ltb	35866	ENSMUSG00000024399	-1.68028	4.22791	53.2223	2.97859e-13	3.21917e-11
Odc1	31486	ENSMUSG00000011179	-1.68524	10.6354	53.0699	3.21895e-13	3.44581e-11
Zfp811	35683	ENSMUSG00000055202	-3.61836	0.30468	52.9899	3.3527e-13	3.55513e-11
Relb	17476	ENSMUSG00000002983	-1.71346	4.68532	52.6819	3.92198e-13	4.11992e-11
Mylk2	4931	ENSMUSG00000027470	-2.3953	2.50661	52.1009	5.27215e-13	5.48694e-11
Axl	17701	ENSMUSG00000002602	-2.47041	4.2121	52.0604	5.38199e-13	5.54987e-11
Hivep3	11769	ENSMUSG00000028634	-2.28188	4.79624	51.7652	6.25507e-13	6.39154e-11
Fndc7	9575	ENSMUSG00000045326	-2.62708	1.95453	51.3676	7.65905e-13	7.75565e-11
Ptprn	722	ENSMUSG00000026204	-2.43408	2.59619	51.0561	8.97647e-13	9.00853e-11
Marcksl1	12010	ENSMUSG00000047945	-2.28748	8.87762	50.3681	1.27447e-12	1.2677e-10
Abtb2	3985	ENSMUSG00000032724	-2.786	1.81355	48.7438	2.9168e-12	2.87586e-10
Mt2	22843	ENSMUSG00000031762	-1.43768	7.00383	48.1611	3.92597e-12	3.83721e-10
Mustn1	23833	ENSMUSG00000042485	-2.05223	2.47165	47.8215	4.66837e-12	4.52349e-10
Bcl3	17488	ENSMUSG00000053175	-1.69459	4.86672	47.7897	4.74479e-12	4.55824e-10
Gsap	12998	ENSMUSG00000039934	-1.2884	6.39563	46.9964	7.11183e-12	6.77432e-10
Plaur	17638	ENSMUSG00000046223	-1.63628	8.4127	46.2192	1.05736e-11	9.98719e-10
Il10ra	25760	ENSMUSG00000032089	-1.50644	4.3648	46.1507	1.09498e-11	1.02563e-09
Arc	33179	ENSMUSG00000022602	-1.56106	3.30917	45.6917	1.38408e-11	1.2857e-09
St3gal1	33138	ENSMUSG00000013846	-1.48771	4.99254	45.1172	1.85592e-11	1.70988e-09
Ptpre	19907	ENSMUSG00000041836	-1.55825	5.6158	45.0137	1.95661e-11	1.78799e-09
Scin	31646	ENSMUSG00000002565	-2.11853	2.37756	44.7647	2.22193e-11	2.01407e-09
Ehd1	38063	ENSMUSG00000024772	-1.37908	8.59162	44.0876	3.14003e-11	2.82351e-09
Mtmr7	22194	ENSMUSG00000039431	-3.11878	3.57992	43.5581	4.11555e-11	3.67133e-09
Cdyl2	23160	ENSMUSG00000031758	-1.28146	4.38405	43.5166	4.20369e-11	3.72043e-09
Myo1e	26147	ENSMUSG00000032220	-1.56444	8.04658	43.4669	4.31198e-11	3.78645e-09
Dusp2	4442	ENSMUSG00000027368	-1.45262	4.63491	43.3152	4.65952e-11	4.05992e-09
Cmklr1	14086	ENSMUSG00000042190	-2.93205	0.639376	43.0707	5.27966e-11	4.56488e-09
Fhod3	37259	ENSMUSG00000034295	-1.85515	2.29716	42.8218	5.9961e-11	5.14475e-09
Actg1	29850	ENSMUSG00000062825	-0.915345	9.93628	42.7808	6.12286e-11	5.21371e-09
Ptger2	24118	ENSMUSG00000037759	-2.81112	0.786089	42.6086	6.68642e-11	5.63101e-09
Nfkb2	38734	ENSMUSG00000025225	-1.78204	6.41448	42.6008	6.71313e-11	5.63101e-09
Basp1	32843	ENSMUSG00000045763	-1.23045	5.53325	42.4858	7.11982e-11	5.92791e-09
Wisp1	33134	ENSMUSG00000005124	-2.87568	1.93724	42.235	8.09388e-11	6.68935e-09
Frmd6	31855	ENSMUSG00000048285	-1.77948	2.18832	42.2163	8.1717e-11	6.70437e-09
Zc3h12c	25856	ENSMUSG00000035164	-1.2899	5.40839	42.1792	8.32793e-11	6.78304e-09
Bcl2l11	4464	ENSMUSG00000027381	-1.33916	5.07558	42.1443	8.47806e-11	6.84839e-09
Stap1	13635	ENSMUSG00000029254	-1.26355	6.34522	42.1324	8.53002e-11	6.84839e-09
Ptprj	3813	ENSMUSG00000025314	-1.55585	7.45635	41.8789	9.71063e-11	7.74096e-09
Ccl2	28696	ENSMUSG00000035385	-1.99455	3.50759	41.5045	1.17602e-10	9.30879e-09
Adora2b	28080	ENSMUSG00000018500	-1.40511	4.08474	41.4334	1.21957e-10	9.58598e-09
null	26401	ENSMUSG00000096581	-1.56996	5.13198	41.3808	1.25279e-10	9.77874e-09
Ets2	34988	ENSMUSG00000022895	-1.20128	7.66116	41.2994	1.30608e-10	1.01244e-08
Icam1	25332	ENSMUSG00000037405	-1.77801	6.88968	41.2257	1.3563e-10	1.04417e-08
Tsc22d1	24896	ENSMUSG00000022010	-1.36953	6.58692	40.9656	1.5493e-10	1.18463e-08
Arhgef3	23806	ENSMUSG00000021895	-2.22608	3.40957	40.923	1.58344e-10	1.20255e-08
Fgr	12120	ENSMUSG00000028874	-1.63123	6.84433	40.4932	1.97304e-10	1.48839e-08
Csrnp1	26895	ENSMUSG00000032515	-1.42598	4.54655	40.3138	2.16279e-10	1.62065e-08
Cd14	37385	ENSMUSG00000051439	-0.913154	10.1078	40.2801	2.20041e-10	1.63792e-08
Sema4b	18807	ENSMUSG00000030539	-1.44636	5.77114	39.8135	2.7941e-10	2.06616e-08
Srgn	20697	ENSMUSG00000020077	-1.08343	8.25593	39.6912	2.97461e-10	2.18527e-08
Rgs20	15	ENSMUSG00000002459	-2.09653	1.15106	39.6556	3.02939e-10	2.21106e-08
Myo10	32845	ENSMUSG00000022272	-1.12799	7.58527	39.1466	3.93138e-10	2.83261e-08
Srxn1	4889	ENSMUSG00000032802	-0.998629	8.2164	39.1013	4.02383e-10	2.88076e-08
Btg1	21267	ENSMUSG00000036478	-1.08582	7.99354	39.0017	4.23446e-10	3.01236e-08
Slc11a2	33775	ENSMUSG00000023030	-1.15777	6.09666	38.9136	4.42992e-10	3.13159e-08
9130230L23Rik	13475	ENSMUSG00000054598	-1.82328	2.23015	38.5207	5.41765e-10	3.8059e-08
Col27a1	10920	ENSMUSG00000045672	-2.10818	1.54147	38.1858	6.43188e-10	4.49033e-08
Dcbld2	34690	ENSMUSG00000035107	-1.60283	4.81033	38.0509	6.89218e-10	4.75265e-08
Errfi1	12696	ENSMUSG00000028967	-1.87011	4.86966	37.6575	8.43216e-10	5.74409e-08
Ell2	30984	ENSMUSG00000001542	-1.05887	7.49015	37.3406	9.91963e-10	6.71666e-08
Ptges	2694	ENSMUSG00000050737	-1.55102	2.8213	37.1577	1.08954e-09	7.33321e-08
Atxn1	30562	ENSMUSG00000046876	-1.09576	5.53033	36.9624	1.20432e-09	8.05749e-08
Glrx	30986	ENSMUSG00000021591	-1.39435	7.64384	36.8496	1.276e-09	8.48654e-08
Itgax	19821	ENSMUSG00000030789	-2.55368	2.63642	36.2896	1.70065e-09	1.12443e-07
Zfp827	22604	ENSMUSG00000071064	-1.1248	4.42946	36.2299	1.75361e-09	1.15266e-07
Egr2	20739	ENSMUSG00000037868	-1.54907	4.24552	36.0101	1.96295e-09	1.27535e-07
Lamc2	1444	ENSMUSG00000026479	-1.36432	3.23333	35.8667	2.11285e-09	1.36485e-07
Spryd7	24673	ENSMUSG00000021930	-1.27944	6.33537	35.4689	2.59161e-09	1.6551e-07
Atp2b1	21277	ENSMUSG00000019943	-0.959357	7.90381	35.4762	2.58188e-09	1.6551e-07
Agpat9	13861	ENSMUSG00000029314	-1.41901	3.15269	35.2993	2.82732e-09	1.79543e-07
Rbpms2	26086	ENSMUSG00000032387	-1.9008	2.41514	35.2468	2.90457e-09	1.83412e-07
Pde1b	33902	ENSMUSG00000022489	-1.18783	6.57993	35.1852	2.99786e-09	1.88245e-07
Lphn2	9904	ENSMUSG00000028184	-1.89137	2.58914	35.1483	3.05522e-09	1.90782e-07
Plek2	31940	ENSMUSG00000021118	-2.72205	1.63421	34.9138	3.4463e-09	2.12837e-07
Birc3	25177	ENSMUSG00000032000	-1.04477	5.38042	34.918	3.43894e-09	2.12837e-07
Arhgap23	29082	ENSMUSG00000049807	-1.24847	4.47061	34.7262	3.79488e-09	2.33084e-07
Rel	27333	ENSMUSG00000020275	-1.09691	3.9753	34.127	5.16289e-09	3.15385e-07
Irak2	16263	ENSMUSG00000060477	-1.25085	6.10585	33.9763	5.57875e-09	3.37124e-07
Gm12715	11388	ENSMUSG00000059195	-1.1769	4.8474	33.9484	5.65941e-09	3.4017e-07
null	34244	ENSMUSG00000063427	-1.48951	4.73669	33.6182	6.70617e-09	3.96723e-07
Klf7	576	ENSMUSG00000025959	-1.20547	3.29794	33.6282	6.67176e-09	3.96723e-07
Nr1d1	29156	ENSMUSG00000020889	-1.30807	4.66896	33.6005	6.7675e-09	3.98255e-07
Traf5	1988	ENSMUSG00000026637	-1.62761	3.03433	33.5831	6.8284e-09	3.99746e-07
Dot1l	21005	ENSMUSG00000061589	-0.965431	8.25089	33.5476	6.95412e-09	4.04996e-07
Prss46	26780	ENSMUSG00000049719	-2.0341	1.11147	33.3815	7.57392e-09	4.37889e-07
Scimp	28348	ENSMUSG00000057135	-1.95251	1.7705	33.3757	7.59683e-09	4.37889e-07
Fermt2	24127	ENSMUSG00000037712	-2.63508	0.514218	33.2904	7.93739e-09	4.55185e-07
Phldb1	25738	ENSMUSG00000048537	-1.26881	6.56084	33.2805	7.97801e-09	4.55192e-07
Jak2	38465	ENSMUSG00000024789	-1.14449	5.99308	33.2479	8.11272e-09	4.6054e-07
Murc	10668	ENSMUSG00000028348	-2.47329	2.13034	33.0765	8.86012e-09	5.00441e-07
Stx11	20225	ENSMUSG00000039232	-2.21886	2.11769	32.9404	9.50273e-09	5.34054e-07
Tnfrsf9	12698	ENSMUSG00000028965	-2.45453	0.81653	32.6476	1.10475e-08	6.17782e-07
3110043O21Rik	10363	ENSMUSG00000028300	-1.11337	5.35783	32.4725	1.20891e-08	6.72681e-07
Sqstm1	27694	ENSMUSG00000015837	-0.924044	9.65652	32.215	1.38025e-08	7.64234e-07
Malt1	37695	ENSMUSG00000032688	-1.46032	6.66037	31.9749	1.56182e-08	8.6053e-07
Fbxo15	37871	ENSMUSG00000034391	-1.36413	4.4484	31.8712	1.64746e-08	9.03289e-07
Vgf	14546	ENSMUSG00000037428	-1.56366	3.75842	31.4535	2.04272e-08	1.10919e-06
Bcl2l1	4928	ENSMUSG00000007659	-1.39868	6.49901	31.4069	2.09236e-08	1.13068e-06
Rhbdf2	29735	ENSMUSG00000020806	-1.2296	6.95601	31.3348	2.17147e-08	1.16781e-06
Rab15	31926	ENSMUSG00000021062	-1.75745	1.90397	31.0982	2.45298e-08	1.30671e-06
Grap	28068	ENSMUSG00000004837	-1.21316	5.28967	30.7147	2.98887e-08	1.58467e-06
Mybpc3	3833	ENSMUSG00000002100	-1.73522	1.87247	30.5877	3.1911e-08	1.68394e-06
Bcl2a1b	26414	ENSMUSG00000089929	-1.48823	3.94582	30.5724	3.21642e-08	1.68937e-06
Aim1l	12163	ENSMUSG00000012123	-1.70929	2.30831	30.3823	3.54754e-08	1.85462e-06
Pcdh7	13422	ENSMUSG00000029108	-0.844073	8.92493	30.3556	3.5966e-08	1.87156e-06
Il1rn	2430	ENSMUSG00000026981	-1.8831	5.5092	30.2013	3.89454e-08	2.01726e-06
Cyp2s1	17702	ENSMUSG00000040703	-1.4895	3.91121	29.7876	4.82062e-08	2.4629e-06
Kcnd1	5787	ENSMUSG00000009731	-2.23865	0.635201	29.5319	5.5005e-08	2.78494e-06
Cd44	3971	ENSMUSG00000005087	-0.811288	9.57257	29.2624	6.32103e-08	3.18602e-06
Cd274	38469	ENSMUSG00000016496	-2.08585	3.10516	29.1259	6.78247e-08	3.40335e-06
Gm17709	23261	ENSMUSG00000091952	-1.61226	4.53704	28.9798	7.31382e-08	3.65366e-06
Lcp2	27484	ENSMUSG00000002699	-1.33167	7.37259	28.8879	7.66915e-08	3.79741e-06
Gm14636	5978	ENSMUSG00000073274	-1.55103	1.81475	28.826	7.91813e-08	3.88645e-06
Icam5	25335	ENSMUSG00000032174	-1.5914	2.00595	28.729	8.32456e-08	4.06818e-06
Ocstamp	5284	ENSMUSG00000027670	-1.45916	4.99939	28.6473	8.6837e-08	4.22532e-06
Rbfox1	33975	ENSMUSG00000008658	-1.22456	5.99329	28.5745	9.01633e-08	4.33092e-06
Rnf19b	11988	ENSMUSG00000028793	-1.17993	6.48045	28.5649	9.06079e-08	4.33376e-06
Slfn10-ps	28725	ENSMUSG00000072621	-0.964109	4.09299	28.5293	9.22913e-08	4.38097e-06
Plekho2	26084	ENSMUSG00000050721	-1.22337	7.65935	28.4045	9.84381e-08	4.64892e-06
Kctd11	28279	ENSMUSG00000046731	-1.24299	3.23149	28.159	1.11749e-07	5.21783e-06
Cd82	3896	ENSMUSG00000027215	-0.966861	5.84071	27.9435	1.24913e-07	5.77787e-06
Plek	27216	ENSMUSG00000020120	-0.911168	8.39049	27.9491	1.24552e-07	5.77787e-06
Agpat4	35110	ENSMUSG00000023827	-1.43085	5.36283	27.7767	1.36153e-07	6.27197e-06
Slc15a3	38214	ENSMUSG00000024737	-1.67912	5.16713	27.7414	1.3866e-07	6.35411e-06
Tlr2	8886	ENSMUSG00000027995	-0.817695	8.40508	27.5914	1.49842e-07	6.73688e-06
Cd80	34523	ENSMUSG00000075122	-1.87844	0.180062	27.4243	1.63362e-07	7.31551e-06
Hdc	4420	ENSMUSG00000027360	-4.07733	2.7681	27.317	1.7269e-07	7.70252e-06
Gm7278	1438	ENSMUSG00000080950	-1.49931	4.61139	26.9473	2.09084e-07	9.28894e-06
Atf3	1972	ENSMUSG00000026628	-1.63589	4.95268	26.5384	2.58351e-07	1.13877e-05
Abhd5	26941	ENSMUSG00000032540	-0.95872	6.02288	26.4854	2.65531e-07	1.16585e-05
Xcr1	26977	ENSMUSG00000060509	-2.25797	1.88946	26.4647	2.68394e-07	1.17383e-05
Rsbn1	9456	ENSMUSG00000044098	-0.898056	5.39059	26.3401	2.86276e-07	1.24237e-05
Cxcl10	13743	ENSMUSG00000034855	-2.73547	6.66443	26.2012	3.07633e-07	1.32992e-05
Mob3b	10360	ENSMUSG00000073910	-1.48688	2.77551	25.6202	4.15669e-07	1.75643e-05
Bhlhe40	16209	ENSMUSG00000030103	-1.49951	5.66312	25.5385	4.33633e-07	1.82548e-05
Lasp1	29105	ENSMUSG00000038366	-0.826152	8.51901	25.5301	4.3553e-07	1.82662e-05
Cxcl11	13744	ENSMUSG00000060183	-2.74488	2.4325	25.4766	4.4778e-07	1.87102e-05
Shisa3	13497	ENSMUSG00000050010	-2.04272	1.04497	25.3878	4.68868e-07	1.95188e-05
Abr	28544	ENSMUSG00000017631	-0.892075	8.20934	25.3427	4.79963e-07	1.98338e-05
Plagl2	4943	ENSMUSG00000051413	-1.05689	5.84061	25.1902	5.19453e-07	2.1387e-05
Cybb	5866	ENSMUSG00000015340	-0.807624	8.8597	25.1411	5.3285e-07	2.1779e-05
Znrf1	23121	ENSMUSG00000033545	-1.1878	4.952	25.0405	5.6138e-07	2.2862e-05
Casp4	25154	ENSMUSG00000033538	-1.71838	3.4321	24.9523	5.87678e-07	2.37374e-05
Gm16712	36334	ENSMUSG00000097077	-1.39547	1.97136	24.9472	5.89212e-07	2.37374e-05
Arg2	31945	ENSMUSG00000021125	-1.65566	0.558794	24.8046	6.34445e-07	2.53778e-05
Notch1	2550	ENSMUSG00000026923	-1.37532	3.49724	24.7223	6.62131e-07	2.63865e-05
Herpud1	22850	ENSMUSG00000031770	-1.15001	5.76246	24.7047	6.68222e-07	2.63865e-05
Junb	22719	ENSMUSG00000052837	-1.13131	8.58925	24.676	6.78235e-07	2.66551e-05
Rhoc	9470	ENSMUSG00000002233	-1.17387	7.65507	24.6222	6.97428e-07	2.73139e-05
Pik3r5	28191	ENSMUSG00000020901	-0.883694	7.83619	24.6046	7.03846e-07	2.74129e-05
Gramd1b	25660	ENSMUSG00000040111	-0.881311	6.04279	24.6019	7.04834e-07	2.74129e-05
Dcstamp	32964	ENSMUSG00000022303	-1.04948	5.14727	24.4717	7.54083e-07	2.91268e-05
Gm20645	27332	ENSMUSG00000093470	-0.866186	5.43094	24.3264	8.13183e-07	3.1302e-05
Tasp1	4671	ENSMUSG00000039033	-0.874777	4.8244	24.1796	8.7758e-07	3.3551e-05
Dpep3	23006	ENSMUSG00000031898	-2.27157	1.49284	24.1047	9.1236e-07	3.47625e-05
Lrrc25	22467	ENSMUSG00000049988	-0.97211	4.33465	24.0414	9.42884e-07	3.58041e-05
Dpep2	23007	ENSMUSG00000053687	-1.0285	5.46911	24.0272	9.49847e-07	3.58437e-05
Fam171b	3449	ENSMUSG00000048388	-1.91617	0.609996	23.8571	1.0376e-06	3.90055e-05
Tmem229b	31941	ENSMUSG00000046157	-0.968066	6.60606	23.7694	1.08598e-06	4.06881e-05
Vmp1	28822	ENSMUSG00000018171	-0.862907	6.9326	23.7015	1.12494e-06	4.18685e-05
Igf2bp2	34263	ENSMUSG00000033581	-1.34999	4.2024	23.5803	1.19805e-06	4.4151e-05
Nfkbid	17884	ENSMUSG00000036931	-0.88244	6.41051	23.531	1.22917e-06	4.50545e-05
Mir221	5976	ENSMUSG00000065422	-1.50792	1.42856	23.4219	1.30088e-06	4.71674e-05
Sh2d6	15843	ENSMUSG00000052631	-1.21517	3.07438	23.3922	1.32112e-06	4.77473e-05
Btg2	1267	ENSMUSG00000020423	-1.11489	3.3376	23.1968	1.46239e-06	5.25152e-05
Rassf4	16318	ENSMUSG00000042129	-1.0978	7.15612	23.1851	1.47134e-06	5.26683e-05
5830432E09Rik	19909	ENSMUSG00000097471	-1.39363	2.11188	23.1653	1.48652e-06	5.30428e-05
Car13	8364	ENSMUSG00000027555	-1.13155	3.1941	23.052	1.57675e-06	5.60844e-05
Pxn	14169	ENSMUSG00000029528	-0.901658	8.56454	22.7992	1.7984e-06	6.33668e-05
Fam214b	10522	ENSMUSG00000036002	-0.941505	4.73739	22.7572	1.83815e-06	6.4565e-05
Stxbp3a	9574	ENSMUSG00000027882	-0.820816	5.72775	22.4441	2.16354e-06	7.50562e-05
Il2rg	7198	ENSMUSG00000031304	-1.17229	4.8524	22.3439	2.27938e-06	7.88315e-05
Spaca6	35201	ENSMUSG00000080316	-0.896556	4.3013	22.1359	2.54021e-06	8.75828e-05
Pip5k1b	38417	ENSMUSG00000024867	-0.866336	6.64693	22.1083	2.57687e-06	8.83051e-05
Slc2a1	11739	ENSMUSG00000028645	-0.91012	8.05361	22.0247	2.69169e-06	9.16807e-05
Rmdn2	36554	ENSMUSG00000036368	-0.969358	3.32932	21.9108	2.85617e-06	9.66968e-05
Ripk2	10161	ENSMUSG00000041135	-1.05713	5.83363	21.8383	2.96622e-06	0.000100121
Sh2d2a	8940	ENSMUSG00000028071	-2.13051	0.454921	21.6856	3.21191e-06	0.000108089
Psd	38735	ENSMUSG00000037126	-1.71523	3.21756	21.6524	3.26794e-06	0.00010932
Gpr65	32164	ENSMUSG00000021886	-1.25589	3.16163	21.4395	3.65162e-06	0.000121074
Mfap3l	22336	ENSMUSG00000031647	-1.16116	2.71631	21.2699	3.98941e-06	0.000130595
Stat5a	29293	ENSMUSG00000004043	-1.07862	4.85551	21.2664	3.99687e-06	0.000130595
Stim2	13412	ENSMUSG00000039156	-0.983171	5.99106	21.2104	4.11519e-06	0.000133465
Stx6	1469	ENSMUSG00000026470	-0.900903	5.58076	21.1475	4.25249e-06	0.000136957
Ralgds	2611	ENSMUSG00000026821	-1.05258	4.80746	21.0975	4.36495e-06	0.000140115
Hck	4939	ENSMUSG00000003283	-1.32134	7.201	20.995	4.60475e-06	0.000146622
Olfr934	25606	ENSMUSG00000057424	-1.17014	2.99755	20.9447	4.72724e-06	0.000149674
1110002J07Rik	20733	ENSMUSG00000097134	-1.11906	2.80765	20.9447	4.72722e-06	0.000149674
Ifit1	38533	ENSMUSG00000034459	-3.96068	6.28505	20.8181	5.05042e-06	0.00015901
Mndal	1784	ENSMUSG00000090272	-1.89426	6.44437	20.6194	5.60263e-06	0.000175904
Perm1	12842	ENSMUSG00000078486	-1.28788	2.973	20.4543	6.10717e-06	0.000190679
Evi2a	28652	ENSMUSG00000078771	-0.995157	6.6819	20.3219	6.54465e-06	0.00020265
Swap70	19514	ENSMUSG00000031015	-0.780429	7.47864	20.2751	6.70693e-06	0.000207104
Fnbp1l	9677	ENSMUSG00000039735	-0.697484	8.09997	20.208	6.94619e-06	0.000213904
Pdcd1	1004	ENSMUSG00000026285	-1.25162	6.99431	20.1103	7.31015e-06	0.000222672
Fyb	32750	ENSMUSG00000022148	-0.859806	7.18939	20.119	7.27715e-06	0.000222672
Sla	33133	ENSMUSG00000022372	-0.958104	4.63777	20.0491	7.54779e-06	0.000227592
Tnfrsf1b	12503	ENSMUSG00000028599	-1.74523	4.14928	19.9894	7.78719e-06	0.000234032
Oasl1	14135	ENSMUSG00000041827	-2.97536	8.49878	19.9143	8.09916e-06	0.000242759
Flnb	23615	ENSMUSG00000025278	-0.810541	8.00957	19.8231	8.49495e-06	0.000252601
8030451A03Rik	10942	ENSMUSG00000073821	-1.59841	0.861209	19.7051	9.03597e-06	0.000265875
Rasgef1b	13822	ENSMUSG00000029333	-1.67405	4.51532	19.5557	9.77096e-06	0.000285261
Gm10425	32474	ENSMUSG00000097081	-1.54455	1.30372	19.5392	9.85585e-06	0.000286657
Igf2r	35120	ENSMUSG00000023830	-0.777593	7.14718	19.5365	9.86978e-06	0.000286657
Mcl1	9253	ENSMUSG00000038612	-0.704075	9.03434	19.5032	1.0043e-05	0.000290188
Flrt2	32157	ENSMUSG00000047414	-1.2279	5.81368	19.4842	1.01436e-05	0.000292343
Pstpip2	37813	ENSMUSG00000025429	-0.819782	4.81786	19.4369	1.0398e-05	0.000298909
Aldh4a1	12340	ENSMUSG00000028737	-1.03137	3.90233	19.3753	1.07387e-05	0.000307132
Micall1	33356	ENSMUSG00000033039	-0.784947	5.90809	19.3777	1.07254e-05	0.000307132
Procr	5022	ENSMUSG00000027611	-1.13206	4.4812	19.1478	1.20977e-05	0.000342514
Tgfb1	17698	ENSMUSG00000002603	-1.02138	8.36116	18.9436	1.34638e-05	0.000378332
Smox	4578	ENSMUSG00000027333	-0.930939	7.17636	18.8948	1.38126e-05	0.000386204
Stk40	11914	ENSMUSG00000042608	-1.18783	5.53835	18.8592	1.40734e-05	0.000391547
Sema4d	30640	ENSMUSG00000021451	-0.835254	6.6559	18.7879	1.46093e-05	0.000404455
Ptprs	36359	ENSMUSG00000013236	-0.696263	7.82648	18.7158	1.51717e-05	0.000417966
Nfkbib	17806	ENSMUSG00000030595	-1.20041	5.80536	18.6013	1.61115e-05	0.00044169
Vps37a	22193	ENSMUSG00000031600	-0.803516	5.15154	18.6031	1.6096e-05	0.00044169
Dock10	768	ENSMUSG00000038608	-0.912276	7.21879	18.5482	1.65665e-05	0.00045306
Cuedc1	28879	ENSMUSG00000018378	-0.81772	3.85203	18.503	1.69635e-05	0.000462789
Metrnl	29931	ENSMUSG00000039208	-0.917104	3.88944	18.488	1.70977e-05	0.000464198
Ccr1	26978	ENSMUSG00000025804	-1.4377	1.60719	18.3636	1.82508e-05	0.000493122
null	9847	ENSMUSG00000028269	-3.54533	1.77629	18.337	1.85077e-05	0.000498865
Sertad1	17751	ENSMUSG00000008384	-0.931281	4.92052	18.2359	1.95167e-05	0.000522232
Dus2	23009	ENSMUSG00000031901	-0.857275	5.23561	18.24	1.9475e-05	0.000522232
Pgm5	38421	ENSMUSG00000041731	-2.05836	0.830483	18.152	2.03959e-05	0.000541962
Nsmf	2453	ENSMUSG00000006476	-0.78171	4.94114	17.9896	2.22111e-05	0.000587113
Peli1	27271	ENSMUSG00000020134	-1.41023	5.61193	17.9405	2.27917e-05	0.000599951
Rap1b	21432	ENSMUSG00000052681	-0.778013	8.48752	17.9283	2.29391e-05	0.000600164
Cflar	485	ENSMUSG00000026031	-1.02949	6.33477	17.8696	2.3657e-05	0.00061552
Xylt2	28959	ENSMUSG00000020868	-0.932674	5.56103	17.8226	2.42485e-05	0.00062656
Icosl	20878	ENSMUSG00000000732	-1.07391	2.73634	17.8036	2.44926e-05	0.000629969
Rapgef2	8843	ENSMUSG00000062232	-0.749803	5.58633	17.7555	2.51186e-05	0.000643127
Slc30a1	1985	ENSMUSG00000037434	-0.752116	4.89616	17.4493	2.9507e-05	0.000743853
Itgb2	20847	ENSMUSG00000000290	-0.680956	8.45275	17.4362	2.97117e-05	0.000745715
Ppm1k	15586	ENSMUSG00000037826	-1.27374	3.14613	17.3874	3.04837e-05	0.000761415
Oas1b	14255	ENSMUSG00000029605	-2.06429	4.11185	17.3555	3.09999e-05	0.000772593
Osm	27048	ENSMUSG00000058755	-1.08278	2.60618	17.334	3.13531e-05	0.000777943
Filip1l	34686	ENSMUSG00000043336	-1.2137	4.05127	17.2982	3.19488e-05	0.000790978
Rffl	28712	ENSMUSG00000020696	-1.12574	3.00083	17.286	3.2154e-05	0.000792771
Ap1s3	759	ENSMUSG00000054702	-0.7909	6.16655	17.2242	3.32173e-05	0.000815201
Slc39a4	33267	ENSMUSG00000063354	-1.34749	0.697997	17.1843	3.39232e-05	0.000828906
Myof	38571	ENSMUSG00000048612	-0.738432	8.09127	17.1126	3.52271e-05	0.000858598
Ksr1	28640	ENSMUSG00000018334	-1.67245	0.442362	17.0408	3.65853e-05	0.000883623
Gripap1	5785	ENSMUSG00000031153	-0.769596	7.76314	16.9982	3.74155e-05	0.000900535
Stk10	27456	ENSMUSG00000020272	-0.842016	6.77602	16.9803	3.77702e-05	0.00090713
Fam133b	12857	ENSMUSG00000058503	-0.719107	5.96929	16.9329	3.87245e-05	0.000928068
Myo1d	28681	ENSMUSG00000035441	-0.899821	5.38499	16.8531	4.03871e-05	0.000963939
Dusp1	35511	ENSMUSG00000024190	-0.914466	4.12231	16.8414	4.06364e-05	0.000967697
Ppp1r1a	33903	ENSMUSG00000022490	-1.51075	0.185779	16.7997	4.154e-05	0.000987124
Slfn4	28729	ENSMUSG00000000204	-1.38201	7.57338	16.7504	4.26333e-05	0.00101097
Iffo2	12337	ENSMUSG00000041025	-0.854807	4.88087	16.7399	4.2871e-05	0.00101446
Mx2	35013	ENSMUSG00000023341	-3.20255	5.42007	16.6663	4.45652e-05	0.00104793
Slc11a1	682	ENSMUSG00000026177	-0.819647	7.44769	16.624	4.557e-05	0.00106933
Zfp36	17788	ENSMUSG00000044786	-1.25457	6.74883	16.5988	4.61813e-05	0.00107916
Rilpl2	14369	ENSMUSG00000029401	-0.815564	5.07374	16.4621	4.96328e-05	0.00115502
Rgl1	1436	ENSMUSG00000026482	-0.808263	7.32283	16.3505	5.26436e-05	0.00122255
Itgav	3446	ENSMUSG00000027087	-0.689341	8.74772	16.3061	5.38914e-05	0.00124638
Gm22	23263	ENSMUSG00000043903	-1.19116	2.03064	16.2793	5.46565e-05	0.00126148
Sod2	35137	ENSMUSG00000006818	-0.806432	7.21721	16.257	5.53054e-05	0.00127384
Glipr1	21374	ENSMUSG00000056888	-0.751742	7.37134	16.1984	5.70415e-05	0.00131114
Slc9a3r2	35405	ENSMUSG00000002504	-1.11816	2.42151	16.1903	5.72881e-05	0.00131144
Zbtb7a	21030	ENSMUSG00000035011	-0.758807	7.59602	16.1879	5.73595e-05	0.00131144
Grasp	33802	ENSMUSG00000000531	-0.973342	3.46553	16.0789	6.07559e-05	0.00138518
Pip5k1a	9219	ENSMUSG00000028126	-0.732432	6.35887	15.987	6.37781e-05	0.00144821
Npl	1451	ENSMUSG00000042684	-0.831179	4.29805	15.9221	6.60041e-05	0.00149397
Litaf	34020	ENSMUSG00000022500	-0.803677	6.20422	15.9199	6.60805e-05	0.00149397
Ptpn5	18348	ENSMUSG00000030854	-0.789433	5.00063	15.8603	6.81927e-05	0.00152991
Map1b	31176	ENSMUSG00000052727	-1.2107	1.78974	15.8073	7.01303e-05	0.00156713
Calcrl	3462	ENSMUSG00000059588	-0.702368	6.68031	15.7831	7.10354e-05	0.0015842
Irgm2	27899	ENSMUSG00000069874	-2.33815	5.50019	15.6275	7.71259e-05	0.00170897
Abca1	10724	ENSMUSG00000015243	-1.49366	0.180261	15.6247	7.72381e-05	0.00170897
Rhob	31420	ENSMUSG00000054364	-0.997412	3.05412	15.5518	8.02734e-05	0.00176916
Osgin2	10158	ENSMUSG00000041153	-0.772023	5.08969	15.5432	8.06408e-05	0.00177378
Dnajb5	10515	ENSMUSG00000036052	-1.09223	2.16853	15.4962	8.26719e-05	0.00181137
Isg15	12840	ENSMUSG00000035692	-2.96054	5.39652	15.3946	8.72376e-05	0.00189662
Mapkapk2	1201	ENSMUSG00000016528	-0.714938	8.79284	15.3394	8.98234e-05	0.00194906
Car2	8369	ENSMUSG00000027562	-0.604688	8.7075	15.2853	9.24338e-05	0.0019956
Nrp2	546	ENSMUSG00000025969	-0.598379	9.19709	15.2156	9.59056e-05	0.00205721
Mnda	1785	ENSMUSG00000026536	-2.75141	2.51631	15.1659	9.84681e-05	0.00210015
Micu3	22189	ENSMUSG00000039478	-0.737722	3.65374	15.1552	9.90267e-05	0.00210807
Txnrd1	21095	ENSMUSG00000020250	-0.545184	9.59822	15.1405	9.9798e-05	0.00212047
Top1	5149	ENSMUSG00000070544	-0.605842	7.95114	15.1355	0.000100064	0.00212211
Gpr157	12680	ENSMUSG00000047875	-1.20602	0.943161	15.1141	0.000101204	0.00213823
Bcorl1	6352	ENSMUSG00000036959	-0.861781	3.50383	15.0965	0.000102154	0.00215425
Tns3	27152	ENSMUSG00000020422	-0.608859	8.84111	15.0921	0.000102389	0.00215514
Serpinb9	30428	ENSMUSG00000045827	-0.735814	4.35634	15.0411	0.000105193	0.00220591
Gm21897	34084	ENSMUSG00000094472	-0.883463	3.10725	15.0025	0.00010737	0.00224737
Rarg	33844	ENSMUSG00000001288	-0.908	3.91166	14.8581	0.000115906	0.00240917
Cln5	25003	ENSMUSG00000022125	-0.723011	6.38102	14.8573	0.000115957	0.00240917
Hipk2	15231	ENSMUSG00000061436	-0.721972	5.77086	14.7862	0.000120417	0.0024926
Cdk18	1225	ENSMUSG00000026437	-0.677915	5.65365	14.7818	0.000120695	0.00249377
Syt16	31895	ENSMUSG00000044912	-1.10809	1.59924	14.7509	0.000122689	0.00253031
Slfn5	28719	ENSMUSG00000054404	-2.0344	5.50969	14.6646	0.000128433	0.00263374
Jag1	4654	ENSMUSG00000027276	-0.879017	5.46286	14.6513	0.000129344	0.00263374
Tet2	9775	ENSMUSG00000040943	-0.75554	5.701	14.6589	0.000128824	0.00263374
Slc3a2	38134	ENSMUSG00000010095	-0.669203	8.34012	14.6536	0.000129191	0.00263374
Ass1	2707	ENSMUSG00000076441	-1.60151	3.2853	14.6444	0.000129821	0.00263869
Gm8995	19399	ENSMUSG00000063286	-1.72718	6.20012	14.6288	0.0001309	0.00265264
Prkcd	23827	ENSMUSG00000021948	-0.734463	7.53114	14.6276	0.00013098	0.00265264
Gm11545	28963	ENSMUSG00000075611	-0.687274	5.38014	14.5605	0.000135734	0.00272924
Cd47	34634	ENSMUSG00000055447	-0.672031	6.02073	14.5197	0.000138698	0.00277396
Hmcn2	2706	ENSMUSG00000055632	-1.59903	1.3299	14.4245	0.000145895	0.00290241
Ddx28	23010	ENSMUSG00000045538	-0.706339	5.40504	14.4098	0.000147032	0.00291985
Mir22hg	28512	ENSMUSG00000085148	-0.657751	4.87601	14.3969	0.000148045	0.0029348
Ptafr	12107	ENSMUSG00000056529	-1.33926	2.28547	14.3616	0.000150846	0.00297981
Gm26667	34825	ENSMUSG00000097418	-1.6535	1.07218	14.3297	0.000153422	0.00302538
Pip5k1c	21045	ENSMUSG00000034902	-0.614839	8.70816	14.3045	0.000155491	0.00306081
Itpkb	1859	ENSMUSG00000038855	-0.8524	5.15456	14.2982	0.000156012	0.00306569
Stac2	29118	ENSMUSG00000017400	-1.00441	2.70226	14.2906	0.000156648	0.00307281
Nckap1l	33901	ENSMUSG00000022488	-0.586653	8.45029	14.2772	0.000157764	0.00308932
Txlnb	20253	ENSMUSG00000039891	-1.46758	0.206315	14.2397	0.000160938	0.00313509
Flt1	14806	ENSMUSG00000029648	-0.767867	6.62136	14.2255	0.000162159	0.00314796
Rhof	14321	ENSMUSG00000029449	-0.73646	6.0039	14.2144	0.000163116	0.00316108
E330009J07Rik	15256	ENSMUSG00000037172	-0.720102	4.00311	14.177	0.000166394	0.00320801
Nod2	22793	ENSMUSG00000055994	-1.81112	2.95945	14.1371	0.000169961	0.00326557
Ticam1	36354	ENSMUSG00000047123	-0.861366	4.50313	14.0531	0.000177722	0.00340307
I830012O16Rik	38531	ENSMUSG00000062488	-3.72784	3.45415	14.0187	0.000180997	0.003454
Zswim4	22689	ENSMUSG00000035671	-0.723674	5.31892	13.9873	0.000184054	0.00348864
9130208D14Rik	19385	ENSMUSG00000086513	-1.79094	1.35643	13.9712	0.000185634	0.00350677
Nupr1	19720	ENSMUSG00000030717	-1.24845	4.12148	13.9616	0.000186587	0.00351885
Rtp4	34303	ENSMUSG00000033355	-2.16353	6.33791	13.905	0.000192281	0.00360808
Nfatc1	37836	ENSMUSG00000033016	-0.553766	9.81867	13.8937	0.000193445	0.00361784
Nadk	12790	ENSMUSG00000029063	-0.582052	8.24466	13.873	0.000195584	0.00365176
Rab11fip4os1	28655	ENSMUSG00000087434	-1.17046	1.59858	13.8589	0.000197059	0.00367222
Daam1	31867	ENSMUSG00000034574	-0.751005	4.40799	13.8563	0.000197333	0.00367222
Tmco3	21842	ENSMUSG00000038497	-0.756372	4.58219	13.8099	0.000202266	0.0037516
Matk	21040	ENSMUSG00000004933	-1.20117	1.24813	13.801	0.00020323	0.00376326
Rgcc	24920	ENSMUSG00000022018	-1.18544	1.91979	13.766	0.000207047	0.00382136
2009-09-01	29762	ENSMUSG00000059248	-0.595256	7.99502	13.7337	0.000210641	0.00388133
Ralgapa2	4754	ENSMUSG00000037110	-0.664792	4.21287	13.6013	0.000226023	0.00412419
Tlr9	26594	ENSMUSG00000045322	-0.826161	3.85341	13.5895	0.000227453	0.00414354
Spata13	24662	ENSMUSG00000021990	-0.659629	6.12643	13.533	0.000234411	0.00424964
Blcap	5095	ENSMUSG00000067787	-0.642144	5.56267	13.4385	0.000246511	0.00444749
Jarid2	30551	ENSMUSG00000038518	-0.781041	6.86263	13.3983	0.000251849	0.00453651
Ubash3b	25674	ENSMUSG00000032020	-0.711771	6.0885	13.3679	0.000255973	0.00458873
Ppp1r15a	18288	ENSMUSG00000040435	-0.783573	4.43608	13.313	0.000263576	0.00470252
Gm6166	25939	ENSMUSG00000074280	-0.728229	5.02231	13.2226	0.000276587	0.00488323
Ppfibp1	16860	ENSMUSG00000016487	-0.666642	7.53398	13.221	0.00027683	0.00488323
4833427F10Rik	35914	ENSMUSG00000092171	-1.41491	0.430846	13.2011	0.000279792	0.00489853
Ifih1	3148	ENSMUSG00000026896	-2.60536	6.49214	13.1939	0.000280861	0.0049067
Ccl6	28750	ENSMUSG00000018927	-1.20873	0.949575	13.1918	0.00028118	0.0049067
Micall2	14651	ENSMUSG00000036718	-0.671166	4.11183	13.1892	0.000281568	0.0049067
Syne2	31905	ENSMUSG00000063450	-1.25929	1.39917	13.1531	0.000287038	0.00498125
Cdk6	12855	ENSMUSG00000040274	-0.665503	4.77975	13.1522	0.000287175	0.00498125
Denr	14350	ENSMUSG00000023106	-0.877752	7.6875	13.1248	0.000291415	0.005047
Polm	27092	ENSMUSG00000020474	-0.75493	3.81895	13.1127	0.000293306	0.00507194
Rrad	22938	ENSMUSG00000031880	-1.08452	2.62398	13.0607	0.000301561	0.00518571
Mfsd12	21051	ENSMUSG00000034854	-0.688309	6.959	13.0596	0.000301731	0.00518571
Plk2	31268	ENSMUSG00000021701	-1.11469	1.86439	13.0364	0.000305492	0.00521052
Anxa7	23713	ENSMUSG00000021814	-0.779393	7.26195	13.022	0.000307861	0.0052382
Irf9	24549	ENSMUSG00000002325	-1.2172	6.09521	12.9253	0.000324172	0.00547924
Zbtb32	17901	ENSMUSG00000006310	-0.847739	7.68723	12.9008	0.000328444	0.00552652
Piezo1	23276	ENSMUSG00000014444	-0.626418	7.28824	12.8875	0.000330785	0.00555758
Tor3a	1489	ENSMUSG00000060519	-1.65784	7.42838	12.8739	0.000333204	0.00558987
Camk2d	9711	ENSMUSG00000053819	-0.684414	4.77927	12.8664	0.000334535	0.0056026
Jade2	27752	ENSMUSG00000020387	-0.675695	4.80836	12.864	0.00033496	0.0056026
Spi1	3832	ENSMUSG00000002111	-0.638578	9.08484	12.8481	0.00033782	0.00564205
Zeb2	2968	ENSMUSG00000026872	-0.584088	7.51308	12.8258	0.000341864	0.00568425
Tmem132a	38215	ENSMUSG00000024736	-1.34936	2.37438	12.6727	0.000371027	0.00612386
Dusp16	16714	ENSMUSG00000030203	-0.642574	4.06851	12.6509	0.000375391	0.0061868
Mtmr14	16239	ENSMUSG00000030269	-0.738946	4.96311	12.6079	0.000384116	0.00629367
Zfp287	28103	ENSMUSG00000005267	-0.81087	3.13152	12.4381	0.000420667	0.00682293
Rsad2	31550	ENSMUSG00000020641	-3.30732	6.73334	12.4116	0.000426668	0.0069103
Pqlc1	37832	ENSMUSG00000034006	-0.671743	5.16729	12.4081	0.000427474	0.0069134
B4galt5	5334	ENSMUSG00000017929	-0.679171	5.6406	12.3964	0.000430152	0.00694671
Samd9l	14867	ENSMUSG00000047735	-1.79138	5.92409	12.3086	0.000450866	0.00726036
Rnf24	4572	ENSMUSG00000048911	-0.639751	5.30169	12.2945	0.000454293	0.00730509
Eno2	16480	ENSMUSG00000004267	-1.04455	1.77635	12.2709	0.00046008	0.00735604
1700109H08Rik	12859	ENSMUSG00000008307	-1.0637	1.20273	12.2598	0.000462818	0.00738931
Ube2e2	23683	ENSMUSG00000058317	-0.634705	3.88901	12.0594	0.000515319	0.00812369
Ube2f	937	ENSMUSG00000034343	-0.6765	6.62418	12.0548	0.000516582	0.00812887
Por	14504	ENSMUSG00000005514	-0.6933	7.90915	12.0354	0.000522006	0.00819462
Tmeff1	10667	ENSMUSG00000028347	-0.614871	5.30152	11.9866	0.000535849	0.00837683
Tm9sf4	4941	ENSMUSG00000068040	-0.665969	6.86462	11.9807	0.000537546	0.00839169
Sik3	25782	ENSMUSG00000034135	-0.752342	6.97863	11.9636	0.000542487	0.00845708
Slc2a6	2578	ENSMUSG00000036067	-0.784227	5.00334	11.9129	0.000557465	0.00865457
Dlgap4	5062	ENSMUSG00000061689	-0.811056	5.94219	11.8687	0.000570843	0.00885003
Npnt	9768	ENSMUSG00000040998	-1.48445	0.652274	11.8107	0.000588927	0.00909277
Hspa1b	35832	ENSMUSG00000090877	-0.812737	4.49307	11.736	0.000613037	0.00940046
Map3k8	37096	ENSMUSG00000024235	-1.07131	2.6049	11.7193	0.000618555	0.00947215
Tmem98	28683	ENSMUSG00000035413	-0.893172	2.72373	11.6989	0.000625357	0.00956329
Dgke	28899	ENSMUSG00000000276	-0.657057	4.13618	11.6941	0.000626998	0.00957535
Frmd4a	2050	ENSMUSG00000026657	-0.671251	5.69414	11.6901	0.000628352	0.009583
mt-Nd5	39172	ENSMUSG00000064367	-0.487208	11.0438	11.6835	0.000630558	0.00959062
Hip1r	14352	ENSMUSG00000000915	-1.13343	1.98045	11.6794	0.000631959	0.00959895
Nabp1	404	ENSMUSG00000026107	-0.771589	3.32878	11.671	0.000634811	0.00962925
Usp18	16386	ENSMUSG00000030107	-2.30639	6.49079	11.661	0.000638252	0.0096684
Plekha5	16776	ENSMUSG00000030231	-0.617128	4.24253	11.641	0.000645132	0.00975947
Cd52	12164	ENSMUSG00000000682	-0.682319	6.84522	11.628	0.000649659	0.00981474
Gm12183	27631	ENSMUSG00000082454	-1.34759	1.14213	11.6061	0.00065735	0.00991761
Rgs8	1452	ENSMUSG00000042671	-1.01608	2.01856	11.6024	0.000658672	0.00992422
Fads3	38188	ENSMUSG00000024664	-0.866586	2.35167	11.5674	0.000671176	0.0100856
Zfp719	18155	ENSMUSG00000030469	-0.69161	3.37856	11.5044	0.000694309	0.0103639
Bcar1	23126	ENSMUSG00000031955	-1.1087	0.942161	11.4366	0.00072013	0.0107351
Arl5c	29113	ENSMUSG00000038352	-1.00678	1.69002	11.3313	0.000762127	0.0112271
Ninj1	30599	ENSMUSG00000037966	-0.620494	7.55585	11.2865	0.000780722	0.011486
Ddhd1	24130	ENSMUSG00000037697	-0.597211	4.07328	11.2265	0.000806368	0.0118478
Oas2	14251	ENSMUSG00000032690	-1.54089	6.92046	11.2185	0.000809874	0.0118838
Lcat	23003	ENSMUSG00000035237	-1.26544	1.7368	11.2061	0.000815287	0.0119476
Coq10b	441	ENSMUSG00000025981	-0.59751	4.3691	11.1905	0.000822153	0.0120168
Fosl1	37996	ENSMUSG00000024912	-0.703002	6.58258	11.175	0.000829081	0.0120711
Slc39a1	9067	ENSMUSG00000052310	-0.583245	7.25795	11.1685	0.000831998	0.0120979
Pear1	8937	ENSMUSG00000028073	-1.23248	0.877952	11.1396	0.00084505	0.012256
4930404N11Rik	21052	ENSMUSG00000020234	-1.08079	2.10503	11.1157	0.000856002	0.0123669
Dnajb4	9920	ENSMUSG00000028035	-0.650302	3.89876	11.0926	0.000866724	0.0125023
Slc9a4	336	ENSMUSG00000026065	-0.618083	5.00869	11.0907	0.000867599	0.0125023
Actb	14696	ENSMUSG00000029580	-0.431417	12.6254	11.0882	0.000868784	0.0125034
null	37382	ENSMUSG00000001379	-0.63716	4.21207	11.0281	0.000897414	0.012866
Sh3kbp1	8148	ENSMUSG00000040990	-0.780922	5.09312	10.9442	0.000938951	0.0134272
Fam129b	2776	ENSMUSG00000026796	-0.51322	9.91828	10.8103	0.00100938	0.0142457
Il10	1200	ENSMUSG00000016529	-1.15195	1.2809	10.7847	0.00102345	0.0143794
Fndc3a	24853	ENSMUSG00000033487	-0.727984	6.05058	10.743	0.00104677	0.0146705
Helz2	5639	ENSMUSG00000027580	-1.76342	6.7384	10.7267	0.00105598	0.0147443
Rfwd2	1507	ENSMUSG00000040782	-0.576393	5.66905	10.702	0.00107022	0.0149246
Rasal1	14249	ENSMUSG00000029602	-0.976593	3.56284	10.6589	0.00109541	0.0152193
Gm11216	10943	ENSMUSG00000086755	-1.12929	0.924447	10.6314	0.00111183	0.0153714
Socs1	34010	ENSMUSG00000038037	-2.03867	2.10095	10.6111	0.00112414	0.0155225
Clec5a	15264	ENSMUSG00000029915	-0.480463	9.21779	10.5954	0.00113367	0.0156158
Wnt1	33712	ENSMUSG00000022997	-1.29977	1.61057	10.5814	0.00114234	0.0157158
Lztfl1	26972	ENSMUSG00000025245	-0.590137	4.00216	10.5783	0.00114424	0.0157228
Lgals4	17811	ENSMUSG00000053964	-1.13011	0.361976	10.5374	0.00116985	0.016055
Prpf38b	9576	ENSMUSG00000027881	-0.500209	8.16501	10.4963	0.00119614	0.0163758
Pgm1	13441	ENSMUSG00000029171	-0.587745	5.70218	10.4531	0.00122442	0.0167223
Il1rl1	333	ENSMUSG00000026069	-0.66476	6.28685	10.4414	0.00123219	0.016808
Gch1	24155	ENSMUSG00000037580	-0.935461	4.86666	10.4371	0.0012351	0.0168274
Abcc1	34076	ENSMUSG00000023088	-0.486123	8.73779	10.4313	0.00123894	0.0168592
Btg3	34808	ENSMUSG00000022863	-0.920458	2.22583	10.3962	0.00126272	0.0171205
Areg	13720	ENSMUSG00000029378	-2.29664	1.66428	10.3866	0.00126933	0.0171895
Mt1	22844	ENSMUSG00000031765	-0.664778	7.38782	10.3719	0.00127947	0.017306
Ezr	35062	ENSMUSG00000052397	-0.633953	6.05824	10.3389	0.00130254	0.0175968
Xaf1	28387	ENSMUSG00000040483	-1.77102	5.08862	10.252	0.00136535	0.0183571
Cxcl16	28320	ENSMUSG00000018920	-0.635659	7.23645	10.2055	0.00140024	0.0187588
D330050G23Rik	4209	ENSMUSG00000085316	-0.830094	2.65724	10.2016	0.00140318	0.0187759
Psmd10	7816	ENSMUSG00000031429	-0.569796	5.34088	10.1638	0.00143225	0.0190761
Gas7	28173	ENSMUSG00000033066	-0.512006	8.01298	10.155	0.0014391	0.0191426
Cpeb4	27438	ENSMUSG00000020300	-0.562243	4.43463	10.1328	0.00145654	0.019306
Irgm1	27640	ENSMUSG00000046879	-1.84773	6.99629	10.0898	0.00149094	0.0197154
Mitf	16159	ENSMUSG00000035158	-0.581734	6.8067	10.0575	0.00151733	0.0199939
Tspan5	9830	ENSMUSG00000028152	-0.559656	5.431	10.0495	0.00152392	0.0200572
Tnfrsf4	12828	ENSMUSG00000029075	-1.16548	1.1531	10.0463	0.00152658	0.0200687
Vasp	17450	ENSMUSG00000030403	-0.533183	8.82655	10.0076	0.00155896	0.0204227
AI607873	1781	ENSMUSG00000073490	-2.18041	7.00863	9.9849	0.00157829	0.0206519
Rnd1	33707	ENSMUSG00000054855	-0.912084	2.51021	9.98178	0.00158097	0.0206629
Trim21	19170	ENSMUSG00000030966	-1.44957	4.36886	9.90648	0.00164698	0.0214757
Angptl4	35720	ENSMUSG00000002289	-0.732169	3.71721	9.88751	0.00166404	0.0216479
Wdr1	13321	ENSMUSG00000005103	-0.464516	8.79716	9.88898	0.00166271	0.0216479
Wsb2	14205	ENSMUSG00000029364	-0.601454	5.97405	9.87645	0.00167407	0.0217533
Cdkn1a	35601	ENSMUSG00000023067	-0.677098	8.52781	9.86544	0.00168412	0.0218586
Irak3	21454	ENSMUSG00000020227	-0.857963	3.15122	9.86217	0.00168712	0.0218722
Parp14	34446	ENSMUSG00000034422	-1.93345	7.15207	9.8554	0.00169334	0.0219024
Tubb6	37718	ENSMUSG00000001473	-0.504693	8.50565	9.82279	0.00172362	0.0221665
Tnks1bp1	3489	ENSMUSG00000033955	-0.742484	2.88104	9.76901	0.00177478	0.0227204
Slfn8	28723	ENSMUSG00000035208	-1.58028	5.82103	9.75886	0.0017846	0.0228177
Hcls1	34495	ENSMUSG00000022831	-0.648989	8.7124	9.75279	0.00179051	0.0228437
Gpr68	32192	ENSMUSG00000047415	-0.569265	4.43848	9.7423	0.00180075	0.0229224
Znfx1	5320	ENSMUSG00000039501	-1.17047	7.26058	9.7315	0.00181136	0.0230053
mt-Atp8	39161	ENSMUSG00000064356	-0.485441	10.5652	9.71614	0.00182657	0.02312
Slc7a8	24509	ENSMUSG00000022180	-0.667834	5.06174	9.70569	0.00183699	0.0232258
Ppp1r10	35928	ENSMUSG00000039220	-0.615562	6.79715	9.68325	0.00185955	0.0234706
Eftud1	18863	ENSMUSG00000038563	-0.543511	5.39157	9.68229	0.00186053	0.0234706
Slc12a4	23004	ENSMUSG00000017765	-0.618735	6.51278	9.66785	0.0018752	0.0235525
Smim3	37621	ENSMUSG00000038059	-0.60976	4.9424	9.66988	0.00187313	0.0235525
Antxr2	13810	ENSMUSG00000029338	-0.552744	6.74004	9.66766	0.0018754	0.0235525
Apobr	19718	ENSMUSG00000042759	-0.591174	7.39012	9.65675	0.00188658	0.0236664
Ryr1	17817	ENSMUSG00000030592	-0.734579	3.45652	9.62598	0.00191844	0.0239859
Pdgfa	14631	ENSMUSG00000025856	-0.614244	5.89381	9.56266	0.00198575	0.0247448
Fam46a	26356	ENSMUSG00000032265	-1.45893	2.5481	9.55701	0.00199187	0.0247936
Daxx	35732	ENSMUSG00000002307	-1.32728	6.70303	9.54837	0.00200127	0.0248831
Spty2d1	18346	ENSMUSG00000049516	-0.533193	4.91826	9.53126	0.00202001	0.025038
Ptpn12	12995	ENSMUSG00000028771	-0.564406	6.24241	9.52519	0.0020267	0.0250882
Dusp18	27027	ENSMUSG00000047205	-0.639509	3.33223	9.51592	0.00203696	0.0251599
Prss50	26781	ENSMUSG00000048752	-1.11384	0.668222	9.51292	0.00204031	0.0251735
Apol9a	33296	ENSMUSG00000057346	-2.3414	3.16027	9.47097	0.00208749	0.0256992
Cotl1	23201	ENSMUSG00000031827	-0.570009	7.21758	9.41567	0.00215139	0.0263401
Cth	9976	ENSMUSG00000028179	-0.626076	3.60436	9.4111	0.00215675	0.0263499
Tha1	29782	ENSMUSG00000017713	-1.03831	1.5042	9.38669	0.00218566	0.0266741
Parp3	26605	ENSMUSG00000023249	-0.682364	3.69161	9.36079	0.00221677	0.0269659
Ptpn22	9453	ENSMUSG00000027843	-0.514743	7.76787	9.35417	0.00222479	0.0270342
Usb1	22881	ENSMUSG00000031792	-0.644944	5.47938	9.35172	0.00222776	0.0270411
Padi2	12368	ENSMUSG00000028927	-0.701837	3.28889	9.29988	0.00229169	0.027629
1700034P13Rik	48	ENSMUSG00000097893	-1.22899	1.02766	9.23544	0.00237375	0.0284749
Sgtb	31223	ENSMUSG00000042743	-0.846351	2.13234	9.18351	0.00244205	0.0292007
Fzd5	586	ENSMUSG00000045005	-0.847733	1.85767	9.16541	0.00246632	0.029397
Siglece	18158	ENSMUSG00000030474	-0.801031	2.36665	9.09819	0.00255862	0.0303044
Mllt11	9232	ENSMUSG00000053192	-0.538446	5.12671	9.07583	0.0025901	0.0305806
Glis1	11447	ENSMUSG00000034762	-1.05439	0.126869	9.058	0.00261548	0.0308478
Ifi203	1786	ENSMUSG00000039997	-2.01254	6.46983	9.04836	0.0026293	0.0309784
Airn	35121	ENSMUSG00000078247	-0.943115	0.995973	9.0209	0.0026691	0.0313159
Tspyl2	8017	ENSMUSG00000041096	-0.57093	4.48262	9.02236	0.00266697	0.0313159
Clec7a	16605	ENSMUSG00000079293	-0.67469	3.94387	9.01049	0.00268435	0.0314313
Tyk2	25343	ENSMUSG00000032175	-0.61707	5.81009	9.01037	0.00268453	0.0314313
Pfkfb3	2259	ENSMUSG00000026773	-0.558274	4.44701	9.00545	0.00269176	0.0314832
Bcl9	9340	ENSMUSG00000038256	-0.552238	6.44596	8.93823	0.00279263	0.0325952
Zc3h3	33215	ENSMUSG00000075600	-0.592894	4.80606	8.91616	0.00282659	0.0328891
Cacna1b	2440	ENSMUSG00000004113	-1.30467	0.179612	8.90638	0.00284176	0.0330314
Ifit3	38529	ENSMUSG00000074896	-2.78477	5.17956	8.86988	0.00289915	0.033516
Uba7	26664	ENSMUSG00000032596	-1.43869	5.68422	8.86849	0.00290134	0.033516
Ern1	29510	ENSMUSG00000020715	-0.524315	4.18251	8.86979	0.00289929	0.033516
Serpinb9b	30429	ENSMUSG00000021403	-0.888454	2.07681	8.85638	0.00292067	0.0336701
Dtx3l	34448	ENSMUSG00000049502	-1.29423	6.18203	8.80475	0.00300448	0.0343543
Oas1g	14259	ENSMUSG00000066861	-1.12129	5.63648	8.78375	0.00303926	0.0346112
Bcar3	9675	ENSMUSG00000028121	-1.30673	4.83216	8.78171	0.00304266	0.0346149
Tcirg1	37906	ENSMUSG00000001750	-0.566236	8.44112	8.72559	0.00313775	0.0356186
Gyk	6973	ENSMUSG00000025059	-0.541378	5.67198	8.69975	0.00318254	0.036024
Trim56	14549	ENSMUSG00000043279	-0.732161	6.21084	8.64537	0.00327894	0.0370033
Tmem86a	18347	ENSMUSG00000010307	-0.836054	1.44661	8.64007	0.00328848	0.0370738
H2-T23	35940	ENSMUSG00000067212	-0.728894	5.3604	8.62282	0.00331978	0.0373143
Anxa3	13802	ENSMUSG00000029484	-0.702573	2.84541	8.61661	0.00333112	0.0374044
Il15	22635	ENSMUSG00000031712	-1.47821	1.50253	8.59845	0.0033645	0.0377039
Cited2	20251	ENSMUSG00000039910	-0.493801	9.83958	8.58569	0.00338816	0.0379312
Camk1d	2077	ENSMUSG00000039145	-0.532484	6.23814	8.56627	0.00342449	0.0382997
Gm17435	22553	ENSMUSG00000097000	-0.914451	1.43835	8.56256	0.00343147	0.0383016
Opn3	1810	ENSMUSG00000026525	-1.23594	2.46213	8.54313	0.00346829	0.0385976
Slc25a19	29683	ENSMUSG00000020744	-0.529752	4.5633	8.52243	0.00350796	0.0389234
Ifi202b	1787	ENSMUSG00000026535	-2.07688	5.29887	8.50076	0.00354998	0.0393121
Clec4a1	16422	ENSMUSG00000049037	-1.18	1.08798	8.40182	0.00374845	0.0411223
Zmynd15	28321	ENSMUSG00000040829	-0.560085	4.31879	8.40629	0.00373926	0.0411223
Tmem26	20747	ENSMUSG00000060044	-0.514105	7.05053	8.36821	0.00381842	0.0417095
Pik3ap1	38622	ENSMUSG00000025017	-0.498557	6.0596	8.36936	0.003816	0.0417095
Rwdd4a	22275	ENSMUSG00000031568	-0.52235	6.47248	8.33924	0.00387979	0.0423387
Armc7	29673	ENSMUSG00000057219	-0.546498	4.681	8.33673	0.00388515	0.0423457
Sap30	22320	ENSMUSG00000031609	-0.775638	6.63355	8.31111	0.00394032	0.042709
Cldn12	12879	ENSMUSG00000046798	-0.72317	2.58703	8.30168	0.00396084	0.0428901
Hivep2	20238	ENSMUSG00000015501	-0.529676	5.24907	8.28932	0.00398788	0.0431413
H2-Q6	35890	ENSMUSG00000073409	-0.626437	4.30229	8.25698	0.00405957	0.0436994
Dnmt3a	31382	ENSMUSG00000020661	-0.504531	7.27077	8.25793	0.00405745	0.0436994
Spink5	37496	ENSMUSG00000055561	-0.562026	3.61584	8.19992	0.00418922	0.0448019
Igtp	27898	ENSMUSG00000078853	-1.83497	4.93222	8.17168	0.00425494	0.0453323
Tmem202	25986	ENSMUSG00000049526	-1.12469	0.0537687	8.14448	0.00431925	0.045927
Mapk6	26242	ENSMUSG00000042688	-0.418654	8.42161	8.132	0.00434909	0.0461167
Fos	32062	ENSMUSG00000021250	-0.515512	7.09585	8.12534	0.00436507	0.0462426
Trim34a	19300	ENSMUSG00000056144	-1.6865	1.80351	8.1167	0.00438593	0.0463326
Cebpd	34090	ENSMUSG00000071637	-0.839934	4.90595	8.09932	0.00442819	0.0467351
Pdlim7	30701	ENSMUSG00000021493	-0.575043	6.48651	8.08964	0.0044519	0.0469412
Rnf114	5337	ENSMUSG00000006418	-0.802145	6.43258	7.9966	0.00468652	0.0491844
Abi1	2405	ENSMUSG00000058835	-0.485522	6.92943	7.9924	0.00469741	0.0492527
Gm9917	26643	ENSMUSG00000097099	-0.779738	1.70825	7.98411	0.00471896	0.0494326
Notch2	9352	ENSMUSG00000027878	-0.54516	7.10308	7.97834	0.00473403	0.0494981
Cd9	16521	ENSMUSG00000030342	-0.451482	9.09383	7.95543	0.00479433	0.050082
Il1rap	34324	ENSMUSG00000022514	-0.51019	4.45374	7.93924	0.00483742	0.0504853
Rusc2	10528	ENSMUSG00000035969	-0.585314	5.15026	7.9199	0.0048894	0.0509331
Psmd8	17827	ENSMUSG00000030591	-0.488748	8.13932	7.91247	0.00490951	0.051048
Ifi204	1782	ENSMUSG00000073489	-2.00084	4.74347	7.8682	0.00503118	0.0520722
Fabp5	8335	ENSMUSG00000027533	-0.527606	5.18424	7.85635	0.00506425	0.0522421
2011-09-01	13761	ENSMUSG00000058013	-0.508135	7.41613	7.84419	0.00509844	0.0524304
Ddx58	10400	ENSMUSG00000040296	-1.76125	6.57144	7.82199	0.00516144	0.0529013
Fbxo11	36649	ENSMUSG00000005371	-0.494423	6.27598	7.82335	0.00515754	0.0529013
Gbp7	9845	ENSMUSG00000040253	-2.28393	2.76865	7.80354	0.0052144	0.0533788
Trim25	28898	ENSMUSG00000000275	-0.843035	8.0308	7.79764	0.00523145	0.0534837
P2ry6	19127	ENSMUSG00000048779	-0.53847	7.0812	7.75082	0.0053688	0.0546562
Irf7	20010	ENSMUSG00000025498	-1.5953	6.82524	7.70194	0.00551614	0.0558896
Plekhf1	18052	ENSMUSG00000074170	-0.951613	1.59239	7.70088	0.00551939	0.0558896
Pdlim5	9843	ENSMUSG00000028273	-0.483521	5.43802	7.69927	0.00552431	0.0558896
Stat2	21576	ENSMUSG00000040033	-1.61595	6.2473	7.69527	0.00553658	0.0559633
Etv3	8931	ENSMUSG00000003382	-0.49997	6.24693	7.69286	0.00554396	0.0559875
St7	14982	ENSMUSG00000029534	-0.510633	4.55104	7.68832	0.00555794	0.0560784
Hmga1	35545	ENSMUSG00000046711	-0.55109	8.80221	7.68095	0.00558069	0.056207
Tbc1d1	13445	ENSMUSG00000029174	-0.481784	6.03301	7.66296	0.00563658	0.0566683
Siglec1	4560	ENSMUSG00000027322	-0.918755	4.31919	7.6594	0.00564772	0.0567296
Tnfrsf12a	35342	ENSMUSG00000023905	-0.514075	5.55665	7.64305	0.00569916	0.0571441
H2-T10	35951	ENSMUSG00000079491	-0.956481	0.784048	7.61536	0.00578732	0.0578732
Mdm2	21429	ENSMUSG00000020184	-0.459053	7.40305	7.57493	0.00591857	0.0591331
Gbp3	9846	ENSMUSG00000028268	-2.58709	2.56161	7.55853	0.00597266	0.0593783
Pde4c	22474	ENSMUSG00000031842	-1.00786	0.31743	7.55914	0.00597064	0.0593783
Mafk	14654	ENSMUSG00000018143	-0.786157	5.47788	7.56252	0.00595946	0.0593783
Anpep	18798	ENSMUSG00000039062	-0.575668	3.43625	7.55961	0.00596909	0.0593783
mt-Nd2	39150	ENSMUSG00000064345	-0.451455	11.1588	7.55585	0.00598157	0.059393
Cmpk2	31551	ENSMUSG00000020638	-2.41681	6.0174	7.54037	0.00603316	0.0598524
Gm13822	14134	ENSMUSG00000087477	-1.44949	0.33301	7.53567	0.00604892	0.0599558
Ptpn23	26765	ENSMUSG00000036057	-0.509083	6.19364	7.52672	0.00607903	0.0602012
Trim30a	19312	ENSMUSG00000030921	-1.43097	5.13981	7.51928	0.00610422	0.0603974
Exoc3l4	32473	ENSMUSG00000021280	-0.831059	0.86243	7.50602	0.00614931	0.0607603
Mcemp1	21722	ENSMUSG00000013974	-0.733917	1.89248	7.49941	0.00617191	0.0609063
St3gal6	34691	ENSMUSG00000022747	-0.492766	4.38764	7.45549	0.00632431	0.0622463
Gypc	37304	ENSMUSG00000090523	-0.909903	0.334813	7.45115	0.00633961	0.0623423
Eif2ak2	36542	ENSMUSG00000024079	-1.11446	6.77786	7.42372	0.00643695	0.0631338
Sgsm1	14083	ENSMUSG00000042216	-0.52523	4.28102	7.38616	0.00657276	0.06413
mt-Nd1	39146	ENSMUSG00000064341	-0.426743	12.5826	7.37572	0.00661102	0.0644474
Ccnj	38613	ENSMUSG00000025010	-0.531261	4.12355	7.33945	0.00674573	0.06559
Gm17131	14402	ENSMUSG00000085328	-0.514578	4.58013	7.33324	0.0067691	0.0657036
Etv6	16707	ENSMUSG00000030199	-0.504725	6.34115	7.3226	0.00680927	0.0660364
Lipt1	294	ENSMUSG00000037216	-0.677564	2.9087	7.31463	0.00683956	0.0662159
Ercc1	17456	ENSMUSG00000003549	-0.581472	5.84942	7.30767	0.0068661	0.0663585
Carhsp1	33988	ENSMUSG00000008393	-0.602141	4.77823	7.2962	0.00691006	0.0665091
Brd2	35757	ENSMUSG00000024335	-0.426668	8.72282	7.272	0.00700377	0.067284
Gm11425	28724	ENSMUSG00000082419	-0.831751	1.67476	7.26896	0.00701565	0.0673407
1700034H15Rik	1984	ENSMUSG00000055833	-0.903953	0.603436	7.24286	0.00711837	0.068152
Nab2	21540	ENSMUSG00000025402	-0.667751	5.79116	7.23264	0.00715897	0.0684824
Zc3hav1	15219	ENSMUSG00000029826	-0.731597	7.71948	7.20112	0.00728582	0.0694594
Rtn2	17453	ENSMUSG00000030401	-1.00852	0.962876	7.18973	0.0073322	0.0696652
Gm7592	819	ENSMUSG00000090186	-1.75698	2.49072	7.17777	0.00738124	0.0699537
Trmt13	9627	ENSMUSG00000033439	-0.504956	3.71252	7.17812	0.00737979	0.0699537
mt-Cytb	39175	ENSMUSG00000064370	-0.389125	12.5684	7.17324	0.0073999	0.0700125
Lamc1	1445	ENSMUSG00000026478	-0.421713	8.33987	7.13335	0.00756634	0.0712872
Fam107b	2044	ENSMUSG00000026655	-0.466514	4.74773	7.13102	0.00757616	0.07132
Aig1	20235	ENSMUSG00000019806	-0.499082	4.0587	7.12376	0.00760691	0.0715495
Gatsl3	27046	ENSMUSG00000020424	-0.771358	1.70523	7.10919	0.00766897	0.0720127
Egr3	24822	ENSMUSG00000033730	-0.920461	1.84168	7.10427	0.00769004	0.0721503
Zufsp	20424	ENSMUSG00000039531	-0.881894	3.71814	7.08981	0.00775236	0.0726433
Spred3	17825	ENSMUSG00000037239	-0.72681	2.00945	7.07024	0.00783747	0.0731645
Ccdc137	29860	ENSMUSG00000049957	-0.459554	5.64979	7.06882	0.00784371	0.0731645
Msantd3	10666	ENSMUSG00000039693	-0.504811	4.72089	7.0667	0.00785296	0.0731901
Agrn	12839	ENSMUSG00000041936	-0.742911	4.88928	7.05127	0.00792092	0.0737623
Enpp4	36164	ENSMUSG00000023961	-0.884852	2.92204	7.0476	0.00793714	0.0738522
Gm8113	24075	ENSMUSG00000089901	-1.65984	1.90654	7.04509	0.00794829	0.0738948
Rnasel	1454	ENSMUSG00000066800	-0.661151	2.88195	7.03835	0.00797824	0.0740508
Vcl	23730	ENSMUSG00000021823	-0.502493	4.83529	7.03171	0.00800787	0.0742032
Adar	9043	ENSMUSG00000027951	-0.961778	7.67305	7.02863	0.00802165	0.0742129
Maff	33367	ENSMUSG00000042622	-0.960059	1.88045	7.02853	0.00802212	0.0742129
Spp1	13891	ENSMUSG00000029304	-0.338641	12.2227	7.02024	0.00805932	0.0744345
Ifi47	27651	ENSMUSG00000078920	-1.37392	3.2209	7.0121	0.00809607	0.0747125
A430106G13Rik	1350	ENSMUSG00000098206	-0.914587	0.411935	6.98749	0.00820816	0.0755608
Rab8b	26113	ENSMUSG00000036943	-0.469747	6.72874	6.95653	0.00835138	0.0767535
Lgals9	28639	ENSMUSG00000001123	-1.06268	5.37321	6.88583	0.00868817	0.0793299
Pard6b	5358	ENSMUSG00000044641	-0.568079	3.06958	6.87849	0.00872392	0.079527
Plekhn1	12843	ENSMUSG00000078485	-0.837501	4.71698	6.87375	0.00874707	0.0796735
Rassf8	16844	ENSMUSG00000030259	-0.597403	5.4813	6.82233	0.00900251	0.081472
Adap2	28672	ENSMUSG00000020709	-1.00827	0.391433	6.81858	0.00902144	0.0815776
Tpm1	26117	ENSMUSG00000032366	-0.431505	7.62153	6.81228	0.00905329	0.0817342
Reep1	15825	ENSMUSG00000052852	-1.00992	0.110554	6.81041	0.0090628	0.0817543
Ifi44l	9914	ENSMUSG00000039146	-1.32684	4.16031	6.80023	0.0091146	0.0821556
Pld3	17755	ENSMUSG00000003363	-0.558079	6.63037	6.79615	0.00913546	0.0822777
Pydc4	1778	ENSMUSG00000073491	-0.879608	3.75481	6.79452	0.00914382	0.082287
Ifi44	9913	ENSMUSG00000028037	-1.31141	7.33571	6.78396	0.00919806	0.0826429
Mbnl2	25089	ENSMUSG00000022139	-0.45432	6.83224	6.78405	0.00919761	0.0826429
Prdm11	3889	ENSMUSG00000075028	-0.806527	0.766498	6.77584	0.00923999	0.0829533
Riok3	37162	ENSMUSG00000024404	-0.461266	6.63205	6.77431	0.00924792	0.0829582
Pla2g5	12313	ENSMUSG00000041193	-0.846774	2.07218	6.76838	0.00927868	0.0831678
Traf3ip2	20459	ENSMUSG00000019842	-0.516783	4.31868	6.75085	0.00937032	0.0837919
St6galnac4	2755	ENSMUSG00000079442	-0.470542	5.55154	6.74936	0.00937813	0.0837919
Aff1	13875	ENSMUSG00000029313	-0.457536	6.15877	6.74089	0.00942278	0.0840572
mt-Nd4	39168	ENSMUSG00000064363	-0.377787	11.9001	6.73898	0.00943286	0.0840804
Runx2	36166	ENSMUSG00000039153	-1.17776	0.883016	6.72996	0.00948068	0.0844396
Ager	35793	ENSMUSG00000015452	-0.84059	0.424587	6.72214	0.00952234	0.0846765
Gm5431	27641	ENSMUSG00000058163	-2.36602	2.36473	6.71816	0.00954363	0.0847711
Rnf213	29825	ENSMUSG00000070327	-1.18121	8.39215	6.71719	0.00954878	0.0847711
Olfr933	25605	ENSMUSG00000058515	-0.633334	2.32345	6.71438	0.00956383	0.0847711
Spsb1	12675	ENSMUSG00000039911	-0.632287	2.55787	6.70463	0.00961627	0.0851078
BC022687	32511	ENSMUSG00000037594	-0.676585	2.0753	6.68658	0.00971415	0.0857449
Tmco5	4208	ENSMUSG00000027355	-0.988561	0.263926	6.65998	0.00986022	0.0866391
Zbtb17	12396	ENSMUSG00000006215	-0.482964	5.3196	6.66263	0.00984555	0.0866391
Dhrs9	3218	ENSMUSG00000027068	-0.456001	6.3226	6.65771	0.00987275	0.0866391
Gm6548	36541	ENSMUSG00000091549	-1.14243	4.52349	6.62787	0.0100395	0.0876799
Rnpc3	9601	ENSMUSG00000027981	-0.452965	4.86833	6.59874	0.0102051	0.0885756
Zfp513	13182	ENSMUSG00000043059	-0.542601	5.37167	6.57272	0.0103553	0.0896308
Sema4c	269	ENSMUSG00000026121	-0.65401	2.80848	6.56682	0.0103898	0.0898315
Ndel1	28197	ENSMUSG00000018736	-0.452534	5.70387	6.54537	0.0105157	0.0907114
Sh3pxd2b	27453	ENSMUSG00000040711	-0.446614	6.38042	6.54366	0.0105259	0.0907292
Rasal2	1495	ENSMUSG00000070565	-0.465934	4.71767	6.53405	0.0105829	0.0911507
Ptchd1	8098	ENSMUSG00000041552	-0.594601	2.88941	6.52081	0.0106619	0.091481
null	35938	ENSMUSG00000078821	-1.02328	0.711292	6.51918	0.0106717	0.0914953
Gm3839	23637	ENSMUSG00000097148	-0.895154	1.93703	6.50744	0.0107424	0.0917513
Sash1	20194	ENSMUSG00000015305	-0.446996	6.51342	6.47956	0.0109122	0.0929896
Actr3	1151	ENSMUSG00000026341	-0.356841	9.1276	6.44389	0.0111334	0.0946595
Apoe	17481	ENSMUSG00000002985	-0.535282	4.02258	6.44025	0.0111563	0.0947695
Zdhhc18	12147	ENSMUSG00000037553	-0.447034	5.88596	6.43914	0.0111632	0.0947695
Alpk2	37693	ENSMUSG00000032845	-0.614467	2.71162	6.43399	0.0111957	0.0949732
Dhx58	29284	ENSMUSG00000017830	-1.55218	5.50673	6.42551	0.0112493	0.0952121
Aebp2	16778	ENSMUSG00000030232	-0.420807	7.74909	6.42614	0.0112453	0.0952121
Gm15601	24129	ENSMUSG00000085913	-0.870209	-0.0244636	6.40461	0.0113824	0.096122
Ubtd2	27454	ENSMUSG00000044949	-0.724272	1.89232	6.39825	0.0114233	0.0962502
Ccrn4l	8608	ENSMUSG00000023087	-0.380234	8.23866	6.39585	0.0114387	0.0963082
Fbxw17	30623	ENSMUSG00000037816	-0.80391	4.19129	6.37061	0.0116026	0.0970914
Gpc1	967	ENSMUSG00000034220	-1.08439	0.414033	6.36188	0.0116598	0.0971742
Gm22579	25239	ENSMUSG00000065663	-0.685604	2.25749	6.34946	0.0117417	0.0977607
Syn1	6010	ENSMUSG00000037217	-0.918109	0.751701	6.34629	0.0117627	0.0978256
Gm14377	18350	ENSMUSG00000085186	-0.804592	0.666508	6.34371	0.0117798	0.0978603
Mrpl52	24489	ENSMUSG00000010406	-0.497586	6.08077	6.34157	0.011794	0.0979062
Cdk5r1	28680	ENSMUSG00000048895	-0.816292	2.8875	6.33728	0.0118226	0.0979986
Cdo1	37527	ENSMUSG00000033022	-0.835877	0.497813	6.32364	0.0119139	0.0985372
Atp9b	37837	ENSMUSG00000024566	-0.438648	6.17217	6.31911	0.0119444	0.0986442
Mob1b	13689	ENSMUSG00000006262	-0.433432	5.88315	6.30002	0.0120737	0.0992896
Pyhin1	1779	ENSMUSG00000043263	-2.33305	2.24303	6.28896	0.0121492	0.0997495
Il13ra1	6165	ENSMUSG00000017057	-0.494532	5.02495	6.28091	0.0122045	0.100058
Zfp142	689	ENSMUSG00000026135	-0.448704	4.75478	6.2692	0.0122855	0.100648
Mxd1	15997	ENSMUSG00000001156	-1.0732	2.78791	6.25222	0.0124038	0.101395
Rab32	20204	ENSMUSG00000019832	-0.442297	5.93758	6.24661	0.0124431	0.101569
H2-T24	35939	ENSMUSG00000053835	-1.20563	5.12817	6.23227	0.0125443	0.101951
Clec12a	16600	ENSMUSG00000053063	-0.465311	6.54101	6.22823	0.0125729	0.102036
Mfsd2a	11827	ENSMUSG00000028655	-0.558093	2.99217	6.20998	0.0127032	0.102796
Ahdc1	12121	ENSMUSG00000037692	-0.552384	3.35771	6.17461	0.0129596	0.104136
Clcn5	5753	ENSMUSG00000004317	-0.532693	4.48811	6.1759	0.0129502	0.104136
Aoc2	29320	ENSMUSG00000078651	-0.522766	3.37917	6.16378	0.0130392	0.104612
Gramd1a	17940	ENSMUSG00000001248	-0.472966	5.52083	6.157	0.0130893	0.104864
Zbp1	5440	ENSMUSG00000027514	-2.13985	4.20178	6.15098	0.013134	0.104972
Ddx60	22349	ENSMUSG00000037921	-1.69481	2.23959	6.15239	0.0131234	0.104972
Zcchc2	1056	ENSMUSG00000038866	-0.586266	6.25511	6.0978	0.013535	0.107591
Trmt61b	36488	ENSMUSG00000085492	-0.637901	2.09944	6.0875	0.0136141	0.108067
Papd7	30924	ENSMUSG00000034575	-0.718551	6.60599	6.08275	0.0136508	0.108194
Dtwd1	4414	ENSMUSG00000023330	-0.451907	4.28136	6.08113	0.0136633	0.108194
Rgs1	1391	ENSMUSG00000026358	-0.815935	2.68734	6.06823	0.0137635	0.108792
Tnnt2	1316	ENSMUSG00000026414	-0.726997	1.4891	6.05132	0.0138959	0.109684
Asb6	2692	ENSMUSG00000039483	-0.485449	5.53015	6.03316	0.0140396	0.110663
4930599N23Rik	15235	ENSMUSG00000073144	-0.875436	2.20603	6.03073	0.0140589	0.110737
Acap1	28280	ENSMUSG00000001588	-0.746207	2.15533	6.02004	0.0141443	0.110944
Pim2	5789	ENSMUSG00000031155	-0.663644	3.75344	6.02073	0.0141388	0.110944
Dcp2	37506	ENSMUSG00000024472	-0.481496	6.04637	6.00908	0.0142324	0.111396
Spire1	37722	ENSMUSG00000024533	-0.45813	5.96345	6.00553	0.0142611	0.111396
Pex12	28737	ENSMUSG00000018733	-0.443719	4.3689	6.00426	0.0142714	0.111396
Tacc2	19851	ENSMUSG00000030852	-0.466861	5.37476	5.99313	0.0143617	0.111945
Ctsz	5468	ENSMUSG00000016256	-0.425946	9.56236	5.94865	0.0147286	0.113623
Herc6	15588	ENSMUSG00000029798	-1.15945	3.67606	5.93388	0.0148525	0.114344
Dclre1c	2036	ENSMUSG00000026648	-0.504376	4.40422	5.9225	0.0149487	0.114849
Inppl1	19143	ENSMUSG00000032737	-0.435068	7.24257	5.9099	0.015056	0.115594
Nbeal2	26771	ENSMUSG00000056724	-0.452779	5.28051	5.90033	0.015138	0.116132
Trp53inp2	5003	ENSMUSG00000038375	-0.551818	3.09274	5.89272	0.0152036	0.116409
Oasl2	14133	ENSMUSG00000029561	-2.0903	4.77839	5.88293	0.0152884	0.116826
Mcts2	4922	ENSMUSG00000042814	-0.645125	2.41246	5.88283	0.0152892	0.116826
Dennd5b	16893	ENSMUSG00000030313	-0.599781	2.313	5.87601	0.0153485	0.11704
Fam96b	22939	ENSMUSG00000031879	-0.528497	5.63587	5.87772	0.0153337	0.11704
Gse1	23213	ENSMUSG00000031822	-0.435537	5.066	5.87164	0.0153867	0.117173
Gm11127	35943	ENSMUSG00000079492	-0.493162	5.00865	5.85356	0.0155456	0.117983
Rgs3	10909	ENSMUSG00000059810	-0.452147	4.74228	5.8446	0.0156249	0.118286
Esf1	4676	ENSMUSG00000045624	-0.425634	6.39077	5.83343	0.0157244	0.118778
Pik3r6	28192	ENSMUSG00000046207	-0.568879	3.83907	5.826	0.015791	0.118979
Arhgap31	34529	ENSMUSG00000022799	-0.459697	3.8412	5.79903	0.016035	0.120155
Gm10602	19144	ENSMUSG00000073985	-0.836653	0.831689	5.77444	0.0162609	0.121282
Sptbn2	37954	ENSMUSG00000067889	-0.865851	1.09328	5.77182	0.0162851	0.121383
Gm14303	5428	ENSMUSG00000081344	-1.1024	2.19145	5.76507	0.0163478	0.121487
Tab2	20191	ENSMUSG00000015755	-0.415979	7.3279	5.76333	0.016364	0.121487
Anxa5	8516	ENSMUSG00000027712	-0.348428	9.80075	5.76723	0.0163277	0.121487
Gm16028	812	ENSMUSG00000090252	-1.10614	2.04743	5.74774	0.0165099	0.122483
Socs7	29081	ENSMUSG00000038485	-0.432466	5.11915	5.74667	0.0165199	0.122483
Dennd4b	9069	ENSMUSG00000042404	-0.428829	6.26947	5.72707	0.0167053	0.123532
Fgd6	21237	ENSMUSG00000020021	-0.435623	5.50506	5.72559	0.0167194	0.123554
Gm14584	6436	ENSMUSG00000083798	-0.52843	3.12689	5.72264	0.0167475	0.123668
Acsl4	7840	ENSMUSG00000031278	-0.408573	7.00625	5.72166	0.0167568	0.123668
Lta	35869	ENSMUSG00000024402	-0.997264	0.453638	5.70961	0.0168722	0.124357
Clic4	12201	ENSMUSG00000037242	-0.400776	9.18061	5.70799	0.0168879	0.12439
Mlxip	14333	ENSMUSG00000038342	-0.424003	6.03471	5.70178	0.0169477	0.124668
Tmem62	4317	ENSMUSG00000054484	-0.463278	3.56369	5.69755	0.0169886	0.124887
Kpna3	24672	ENSMUSG00000021929	-0.410275	7.14399	5.68829	0.0170785	0.12522
Vdr	33676	ENSMUSG00000022479	-0.699081	1.25801	5.66697	0.0172873	0.126421
Ptgir	17386	ENSMUSG00000043017	-0.457001	5.12578	5.65652	0.0173906	0.126632
Tmcc1	16302	ENSMUSG00000030126	-0.43871	3.86832	5.6571	0.0173849	0.126632
Alas1	26595	ENSMUSG00000032786	-0.422846	6.03857	5.66145	0.0173418	0.126632
Eif6	5025	ENSMUSG00000027613	-0.419731	7.40059	5.65729	0.017383	0.126632
Crtc1	22456	ENSMUSG00000003575	-0.430544	5.3599	5.64991	0.0174563	0.126996
mt-Atp6	39162	ENSMUSG00000064357	-0.341032	12.9996	5.64546	0.0175006	0.127072
1700030J22Rik	23165	ENSMUSG00000031847	-0.867527	0.311244	5.64286	0.0175266	0.127178
Apbb2	13482	ENSMUSG00000029207	-0.550081	5.02072	5.59722	0.0179891	0.129947
Arl5b	2301	ENSMUSG00000017418	-0.421878	4.16486	5.59363	0.0180259	0.130129
Rab12	36450	ENSMUSG00000023460	-0.419202	5.58047	5.57662	0.0182018	0.131147
Slc39a13	3831	ENSMUSG00000002105	-0.427052	5.94303	5.56927	0.0182784	0.131614
mt-Nd6	39173	ENSMUSG00000064368	-0.424525	9.97173	5.56496	0.0183234	0.131853
Ifi35	29333	ENSMUSG00000010358	-0.854848	5.52009	5.56095	0.0183654	0.131955
Atat1	35926	ENSMUSG00000024426	-0.567882	2.656	5.56026	0.0183727	0.131955
Parp10	33240	ENSMUSG00000063268	-1.18089	5.39012	5.54237	0.0185615	0.133055
Tapbp	35733	ENSMUSG00000024308	-0.628383	7.95952	5.53071	0.0186855	0.133859
Gm23201	5324	ENSMUSG00000077565	-0.729496	2.27904	5.52393	0.0187581	0.134037
Ercc6	23881	ENSMUSG00000054051	-0.427398	5.50754	5.52541	0.0187422	0.134037
Tpm4	22535	ENSMUSG00000031799	-0.340907	8.69233	5.521	0.0187895	0.134092
Ttyh2	29633	ENSMUSG00000034714	-0.491068	4.79053	5.51202	0.0188862	0.134467
mt-Co1	39156	ENSMUSG00000064351	-0.264026	14.1794	5.5138	0.018867	0.134467
Pvr	17494	ENSMUSG00000040511	-0.421029	5.03402	5.50922	0.0189164	0.13457
Pbld1	20716	ENSMUSG00000020072	-0.747584	0.64958	5.48748	0.0191532	0.135761
Caml	30709	ENSMUSG00000021501	-0.436152	4.73707	5.48718	0.0191564	0.135761
Frrs1	9632	ENSMUSG00000033386	-0.411437	7.03282	5.48822	0.0191451	0.135761
Irf1	27808	ENSMUSG00000018899	-1.35872	4.8364	5.48368	0.0191948	0.135862
AC168977.1	39132	ENSMUSG00000079808	-0.680429	6.09971	5.48427	0.0191883	0.135862
B430306N03Rik	36279	ENSMUSG00000043740	-1.1163	0.747314	5.47717	0.0192664	0.136112
Prkcg	16925	ENSMUSG00000078816	-0.445202	4.02362	5.46849	0.0193623	0.136532
Gtpbp4	29987	ENSMUSG00000021149	-0.38428	7.53201	5.46667	0.0193826	0.136589
Oas1a	14260	ENSMUSG00000052776	-0.859031	6.24521	5.45755	0.0194839	0.137132
5730508B09Rik	9729	ENSMUSG00000050549	-0.626623	3.5981	5.4527	0.0195381	0.137341
Crtc2	9068	ENSMUSG00000027936	-0.426584	6.37711	5.43681	0.0197166	0.138336
Rassf1	26642	ENSMUSG00000010067	-0.404578	4.1031	5.41715	0.0199399	0.139294
Cyp51	12871	ENSMUSG00000001467	-0.406819	6.0245	5.40795	0.0200453	0.139683
Ttc9	31993	ENSMUSG00000042734	-0.793066	0.739868	5.39932	0.0201446	0.140201
Nlrc5	22853	ENSMUSG00000074151	-0.836263	4.80152	5.39538	0.0201902	0.140432
4930440I19Rik	3388	ENSMUSG00000085431	-0.609736	1.89992	5.39266	0.0202216	0.140563
Oas3	14252	ENSMUSG00000032661	-0.859109	6.77774	5.37993	0.0203697	0.141423
Trip12	796	ENSMUSG00000026219	-0.350591	8.1498	5.37277	0.0204535	0.141912
Rcan1	34955	ENSMUSG00000022951	-0.439657	7.75644	5.34734	0.0207539	0.14373
Etf1	37346	ENSMUSG00000024360	-0.339124	8.63908	5.34031	0.0208377	0.144133
A230028O05Rik	34313	ENSMUSG00000096960	-0.464083	3.57735	5.33071	0.0209529	0.14484
Ogfr	5607	ENSMUSG00000049401	-0.759192	6.85669	5.32724	0.0209946	0.144951
Zbtb21	35018	ENSMUSG00000046962	-0.412191	4.79263	5.32749	0.0209916	0.144951
Pomgnt1	11611	ENSMUSG00000028700	-0.410949	6.29368	5.32098	0.0210701	0.145293
1500012F01Rik	5321	ENSMUSG00000074578	-0.421136	5.80179	5.31688	0.0211198	0.145547
Acvrl1	33798	ENSMUSG00000000530	-0.406428	4.99488	5.30985	0.0212052	0.145867
Trem1	36275	ENSMUSG00000042265	-0.807888	0.0558675	5.30206	0.0213003	0.146163
Mitd1	295	ENSMUSG00000026088	-0.808186	4.92944	5.28711	0.0214838	0.146996
H2-Q10	35894	ENSMUSG00000067235	-0.796046	1.79616	5.28685	0.021487	0.146996
Tor1aip2	1480	ENSMUSG00000050565	-0.536621	7.1536	5.26393	0.0217717	0.148663
Actn1	31956	ENSMUSG00000015143	-0.407022	7.1155	5.26298	0.0217837	0.148663
Gm16310	34949	ENSMUSG00000086331	-0.780236	0.342501	5.26113	0.0218068	0.148731
Gucy2g	38815	ENSMUSG00000055523	-0.785735	0.779645	5.24426	0.0220193	0.149295
Gm6206	7265	ENSMUSG00000048949	-0.505749	3.13184	5.24374	0.0220259	0.149295
Lpp	34309	ENSMUSG00000033306	-0.444052	3.66159	5.24312	0.0220337	0.149295
C3ar1	16419	ENSMUSG00000040552	-0.437607	5.89038	5.24933	0.0219553	0.149295
Serinc2	12041	ENSMUSG00000023232	-0.416465	7.18965	5.24262	0.0220401	0.149295
Man1a	20594	ENSMUSG00000003746	-0.406348	4.75924	5.2467	0.0219885	0.149295
Ceacam16	17492	ENSMUSG00000014686	-0.727116	1.23645	5.23394	0.0221503	0.149801
Gm16091	22537	ENSMUSG00000087502	-0.872173	0.743322	5.22785	0.0222279	0.150236
Lpl	22407	ENSMUSG00000015568	-0.314602	10.6009	5.21577	0.0223829	0.151011
Tiparp	8763	ENSMUSG00000034640	-0.464035	4.74871	5.2074	0.022491	0.151467
A530040E14Rik	807	ENSMUSG00000072109	-1.16193	1.67472	5.20339	0.0225428	0.151678
Rps6kc1	1962	ENSMUSG00000089872	-0.419359	4.4308	5.18953	0.0227234	0.152575
B2m	4361	ENSMUSG00000060802	-0.403297	9.15713	5.18984	0.0227193	0.152575
Naa25	14269	ENSMUSG00000042719	-0.49633	6.6647	5.18536	0.022778	0.152851
Acta2	38521	ENSMUSG00000035783	-0.887845	0.925985	5.1715	0.0229603	0.153433
Fhl3	11878	ENSMUSG00000032643	-0.416187	6.87567	5.16669	0.023024	0.153767
Trim13	24674	ENSMUSG00000035235	-0.596349	2.46305	5.16425	0.0230564	0.153892
Zpr1	25788	ENSMUSG00000032078	-0.397767	6.68931	5.15929	0.0231223	0.15424
Zeb2os	2970	ENSMUSG00000052248	-0.703092	0.886451	5.14866	0.0232643	0.155003
Gm26724	35539	ENSMUSG00000097090	-0.790754	0.19572	5.14538	0.0233084	0.155205
Lima1	33758	ENSMUSG00000023022	-0.414024	4.29391	5.13864	0.023399	0.155541
Myo9b	22496	ENSMUSG00000004677	-0.391889	7.01092	5.13751	0.0234142	0.155541
Acot7	12718	ENSMUSG00000028937	-0.445524	7.5262	5.11675	0.023696	0.156857
Phf11c	24647	ENSMUSG00000091144	-0.833214	2.87271	5.11037	0.0237833	0.15725
Smg7	1442	ENSMUSG00000042772	-0.483732	7.08348	5.10809	0.0238146	0.157364
Ndrg1	33135	ENSMUSG00000005125	-0.51923	4.90449	5.09486	0.0239969	0.158289
2310014L17Rik	17233	ENSMUSG00000033967	-0.664923	1.54934	5.08497	0.0241341	0.158753
Tlk2	29473	ENSMUSG00000020694	-0.409754	5.82561	5.08	0.0242033	0.158905
Isg20	18776	ENSMUSG00000039236	-1.60635	3.5444	5.07438	0.0242819	0.159235
Rap2c	6389	ENSMUSG00000050029	-0.381706	6.12024	5.07179	0.0243183	0.159381
Atp6v0a1	29296	ENSMUSG00000019302	-0.462632	5.45736	5.06379	0.0244308	0.159931
H2-K1	35744	ENSMUSG00000061232	-0.498553	6.81759	5.04634	0.024678	0.161268
Baiap2	29836	ENSMUSG00000025372	-0.446059	5.55161	5.03288	0.0248705	0.162149
Hivep1	30529	ENSMUSG00000021366	-0.399895	4.49698	5.03366	0.0248594	0.162149
Taf1d	25231	ENSMUSG00000031939	-0.40161	6.2112	5.01168	0.0251768	0.163861
Zswim8	23726	ENSMUSG00000021819	-0.409783	6.0518	5.00206	0.0253172	0.164584
Elp5	28289	ENSMUSG00000018565	-0.400665	6.01241	4.98551	0.0255605	0.165877
Ppp1r13b	32490	ENSMUSG00000021285	-0.463026	4.04229	4.97766	0.0256767	0.166344
Ebi3	36333	ENSMUSG00000003206	-0.512456	3.5511	4.96497	0.0258658	0.167376
Mtdh	32887	ENSMUSG00000022255	-0.342364	8.32357	4.96555	0.0258571	0.167376
Ier2	22696	ENSMUSG00000053560	-0.427732	5.60433	4.94761	0.0261267	0.168967
H2-Q7	35891	ENSMUSG00000060550	-0.471179	4.02452	4.94072	0.0262311	0.169252
Mybbp1a	28394	ENSMUSG00000040463	-0.325603	9.37246	4.94111	0.0262252	0.169252
Pmepa1	5441	ENSMUSG00000038400	-0.375073	7.65148	4.92191	0.0265181	0.170908
Parp9	34449	ENSMUSG00000022906	-1.0203	6.2999	4.91386	0.026642	0.171313
Cers6	3211	ENSMUSG00000027035	-0.384573	6.86233	4.89547	0.0269272	0.172654
Dyrk1b	17778	ENSMUSG00000002409	-0.709776	0.847987	4.87814	0.0271989	0.173768
Prrg4	4025	ENSMUSG00000027171	-0.712519	1.32532	4.87427	0.02726	0.173993
Smndc1	38799	ENSMUSG00000025024	-0.384508	6.41668	4.86889	0.0273451	0.174339
Sat1	8090	ENSMUSG00000025283	-0.476069	6.55266	4.86541	0.0274003	0.174592
Epsti1	24908	ENSMUSG00000022014	-0.939482	4.39974	4.86417	0.02742	0.174618
Gnas	5462	ENSMUSG00000027523	-0.697036	0.812591	4.85685	0.0275366	0.175261
Ncs1	2705	ENSMUSG00000062661	-0.391443	5.81747	4.84914	0.0276599	0.175947
Smtn	27009	ENSMUSG00000020439	-0.626088	1.77725	4.84711	0.0276925	0.176026
4931428F04Rik	22963	ENSMUSG00000014837	-0.613029	1.77642	4.84291	0.02776	0.176153
Csnk2a2	22884	ENSMUSG00000046707	-0.392849	6.2684	4.83322	0.0279164	0.176778
Prdx1	11629	ENSMUSG00000028691	-0.300825	10.3605	4.82888	0.0279868	0.177075
Polr3g	31024	ENSMUSG00000035834	-0.411922	5.24819	4.81992	0.0281327	0.177647
Cnot7	22192	ENSMUSG00000031601	-0.381771	6.52866	4.81364	0.0282354	0.178195
Abcb9	14355	ENSMUSG00000029408	-0.674724	1.24319	4.80589	0.0283626	0.178797
Pisd	13213	ENSMUSG00000023452	-0.404307	4.84427	4.79609	0.0285244	0.179515
Etnk1	16810	ENSMUSG00000030275	-0.451941	6.82966	4.78805	0.0286578	0.180052
Ifit2	38528	ENSMUSG00000045932	-1.83362	5.84195	4.77903	0.0288083	0.180668
Phf11b	24645	ENSMUSG00000091649	-1.10966	3.0634	4.77761	0.0288321	0.180668
Zbed5	14428	ENSMUSG00000034173	-0.5185	2.73948	4.7784	0.0288189	0.180668
Pkd1l2	23167	ENSMUSG00000034416	-0.419772	4.65292	4.77685	0.0288449	0.180668
Hif1a	31891	ENSMUSG00000021109	-0.373575	6.97049	4.77791	0.0288272	0.180668
Prdx5	38083	ENSMUSG00000024953	-0.423654	6.61253	4.77395	0.0288934	0.180724
Map4k5	31840	ENSMUSG00000034761	-0.379509	5.52752	4.77282	0.0289125	0.180743
Sass6	9628	ENSMUSG00000027959	-0.696349	6.42122	4.76403	0.0290605	0.181366
Csnk1g3	37569	ENSMUSG00000073563	-0.377846	6.0233	4.76438	0.0290545	0.181366
Ddah2	35845	ENSMUSG00000007039	-0.643064	1.76506	4.7595	0.0291371	0.181677
Ccdc86	38220	ENSMUSG00000024732	-0.475507	7.05384	4.74661	0.029356	0.1824
Cln3	19716	ENSMUSG00000030720	-0.413087	6.37503	4.74213	0.0294326	0.182775
Flt3l	18254	ENSMUSG00000089989	-0.790481	1.68551	4.73822	0.0294996	0.18309
9330136K24Rik	35285	ENSMUSG00000097781	-0.683678	0.641553	4.73171	0.0296113	0.18344
Aen	18775	ENSMUSG00000030609	-0.410988	7.07782	4.72938	0.0296516	0.183526
Usp47	19532	ENSMUSG00000059263	-0.378687	6.40185	4.72504	0.0297264	0.183888
Map3k11	38012	ENSMUSG00000004054	-0.397336	6.20839	4.72172	0.0297839	0.184041
Slc25a25	2748	ENSMUSG00000026819	-0.383929	5.45819	4.71564	0.0298895	0.184389
Gna13	29574	ENSMUSG00000020611	-0.373315	7.24126	4.70661	0.0300468	0.184888
Ncor2	14384	ENSMUSG00000029478	-0.350068	7.78861	4.70682	0.0300432	0.184888
Zak	3277	ENSMUSG00000004085	-0.417916	6.37504	4.69938	0.0301736	0.185126
Gpatch4	8950	ENSMUSG00000028069	-0.443236	7.35795	4.69336	0.0302793	0.185471
2210018M11Rik	19070	ENSMUSG00000035401	-0.395049	4.99306	4.69388	0.0302703	0.185471
Setd4	34962	ENSMUSG00000022948	-0.457847	3.21587	4.68078	0.0305018	0.186631
Ankrd13b	28567	ENSMUSG00000037907	-0.405882	6.34325	4.67002	0.0306937	0.187396
Snora68	22489	ENSMUSG00000077563	-0.579836	2.02173	4.65083	0.0310385	0.188988
Kansl1l	614	ENSMUSG00000026004	-0.406847	4.12558	4.63969	0.0312406	0.189614
C5ar1	17365	ENSMUSG00000049130	-0.357396	7.82532	4.64053	0.0312253	0.189614
Cd300lb	29641	ENSMUSG00000063193	-0.31598	8.69452	4.63861	0.0312604	0.18962
Acp5	25391	ENSMUSG00000001348	-0.560735	2.23451	4.62988	0.0314197	0.190176
Dbt	9623	ENSMUSG00000000340	-0.379366	4.94507	4.61772	0.0316433	0.191015
Sf3b4	9274	ENSMUSG00000068856	-0.3941	8.32975	4.60401	0.0318972	0.191972
Abracl	20256	ENSMUSG00000078453	-0.393856	5.80901	4.60399	0.0318977	0.191972
Kremen1	27075	ENSMUSG00000020393	-0.48525	3.52547	4.60059	0.031961	0.19221
Fkbpl	35802	ENSMUSG00000033739	-0.448993	3.75546	4.59931	0.0319849	0.192242
Smyd5	15961	ENSMUSG00000033706	-0.404077	6.90865	4.59847	0.0320005	0.192242
Dusp4	22160	ENSMUSG00000031530	-0.396549	6.3271	4.58618	0.0322308	0.193523
Arg1	20365	ENSMUSG00000019987	-0.68205	1.21568	4.56814	0.032572	0.194896
BC005561	13894	ENSMUSG00000079065	-0.538445	2.43533	4.56704	0.0325928	0.194896
Slc45a3	1220	ENSMUSG00000026435	-0.517954	2.77193	4.56675	0.0325983	0.194896
Gtf2f1	36382	ENSMUSG00000002658	-0.454362	7.11532	4.55495	0.0328238	0.195633
Lsp1	20068	ENSMUSG00000018819	-0.384929	6.98833	4.54622	0.0329914	0.196307
Ctxn1	21751	ENSMUSG00000048644	-0.778123	0.33593	4.52596	0.0333843	0.198329
BC002059	35188	ENSMUSG00000060149	-0.426346	3.35298	4.51062	0.0336851	0.1998
Ipo5	25094	ENSMUSG00000030662	-0.308582	8.74536	4.5025	0.0338453	0.200644
Nol10	31484	ENSMUSG00000061458	-0.399068	6.17857	4.49304	0.0340332	0.201333
Ppp4r2	16180	ENSMUSG00000052144	-0.360694	7.09418	4.49356	0.0340228	0.201333
Supt6	28605	ENSMUSG00000002052	-0.364169	7.68353	4.48878	0.034118	0.201623
Gm17132	14401	ENSMUSG00000061331	-0.49295	2.7741	4.47488	0.0343966	0.20263
Nt5dc3	21145	ENSMUSG00000054027	-0.367105	5.47027	4.47048	0.0344854	0.20294
Rbpsuh-rs3	15388	ENSMUSG00000079575	-0.397573	5.52658	4.46582	0.0345795	0.203085
Ptpn7	1294	ENSMUSG00000031506	-0.354752	7.4794	4.46574	0.0345812	0.203085
Cd24a	20529	ENSMUSG00000047139	-0.738665	2.67784	4.46288	0.0346391	0.203206
Vprbp	26617	ENSMUSG00000040325	-0.377837	5.22325	4.46008	0.0346959	0.203433
Gas8	23317	ENSMUSG00000040220	-0.432618	4.70415	4.45882	0.0347214	0.203477
Gm21811	21925	ENSMUSG00000096401	-0.37341	4.27465	4.44869	0.034928	0.204474
Rsrc2	14346	ENSMUSG00000029422	-0.404154	6.84162	4.44505	0.0350026	0.204698
Prrc2c	1563	ENSMUSG00000040225	-0.308368	8.79786	4.43954	0.0351157	0.205039
Arid5a	260	ENSMUSG00000037447	-0.698684	2.41743	4.43594	0.0351898	0.205244
Hexim1	29421	ENSMUSG00000048878	-0.384329	6.81148	4.43486	0.0352121	0.205244
Ccdc55	28557	ENSMUSG00000037958	-0.420407	5.56673	4.42324	0.0354527	0.206257
Ddit3	21524	ENSMUSG00000025408	-0.470169	2.9284	4.4149	0.0356264	0.206528
Ifitm3	19993	ENSMUSG00000025492	-0.378168	8.22876	4.41483	0.0356279	0.206528
Homer1	31092	ENSMUSG00000007617	-0.380749	4.418	4.4136	0.0356535	0.20657
Gm15832	320	ENSMUSG00000085894	-0.474798	2.85117	4.40552	0.0358228	0.20723
Gnrh1	24784	ENSMUSG00000015812	-0.739136	0.225706	4.39807	0.0359796	0.207882
Gm12696	11282	ENSMUSG00000084159	-0.443069	3.96617	4.39753	0.035991	0.207882
Lgals8	30005	ENSMUSG00000057554	-0.579204	6.34789	4.39577	0.0360282	0.207991
Trip11	32206	ENSMUSG00000021188	-0.365148	5.47894	4.38766	0.0362	0.20866
Msn	7122	ENSMUSG00000031207	-0.302879	9.33737	4.38509	0.0362546	0.208868
Ktn1	24164	ENSMUSG00000021843	-0.37048	5.97263	4.36475	0.0366899	0.210943
Stat1	410	ENSMUSG00000026104	-1.0239	6.89509	4.35788	0.0368382	0.21158
Ccnl1	8767	ENSMUSG00000027829	-0.385503	6.7256	4.35094	0.0369886	0.212086
Chd2	18744	ENSMUSG00000078671	-0.376863	5.05113	4.35166	0.0369729	0.212086
Gm26202	37783	ENSMUSG00000064844	-0.778503	0.0512142	4.34881	0.0370348	0.212167
Rbm34	23420	ENSMUSG00000033931	-0.368655	4.65269	4.34616	0.0370924	0.21236
Tarm1	16930	ENSMUSG00000053338	-0.538787	2.42891	4.3426	0.0371702	0.212617
Itgal	19773	ENSMUSG00000030830	-0.387557	5.15401	4.34062	0.0372134	0.212756
Herc4	20720	ENSMUSG00000020064	-0.356546	6.06583	4.33555	0.0373244	0.213066
Tfe3	5784	ENSMUSG00000000134	-0.351731	7.42972	4.32303	0.0375998	0.213986
Gm2000	1485	ENSMUSG00000078193	-0.576323	2.16464	4.32152	0.0376333	0.214044
Adarb1	20844	ENSMUSG00000020262	-0.393651	4.43147	4.31999	0.0376671	0.214044
Cers4	21757	ENSMUSG00000008206	-0.559199	2.2621	4.31869	0.0376959	0.214099
Tlr3	22237	ENSMUSG00000031639	-0.870126	1.72454	4.31582	0.0377596	0.214224
Prkx	6903	ENSMUSG00000035725	-0.362279	4.88383	4.31422	0.0377952	0.21423
Trim12c	19307	ENSMUSG00000057143	-0.729411	4.37326	4.31089	0.0378692	0.214433
Rad54l2	26615	ENSMUSG00000040661	-0.373274	5.52167	4.30428	0.0380167	0.214727
Gm14286	5094	ENSMUSG00000087445	-0.636366	1.44152	4.29863	0.0381431	0.215225
Rpl9-ps6	38495	ENSMUSG00000062456	-0.606163	2.41961	4.29594	0.0382034	0.215302
Aftph	27264	ENSMUSG00000049659	-0.402497	6.28597	4.29431	0.0382401	0.215302
Rps6ka1	12154	ENSMUSG00000003644	-0.384171	8.09176	4.29681	0.038184	0.215302
Lyar	13314	ENSMUSG00000067367	-0.383669	7.50644	4.29443	0.0382374	0.215302
Maml2	25202	ENSMUSG00000031925	-0.751745	0.603141	4.28581	0.0384317	0.216202
Sp110	821	ENSMUSG00000070034	-0.689708	5.86912	4.28302	0.038495	0.21645
Ccar1	20702	ENSMUSG00000020074	-0.341988	7.37234	4.27926	0.0385802	0.216713
B430305J03Rik	8712	ENSMUSG00000053706	-0.932776	0.0883938	4.26901	0.0388136	0.217579
Pde8b	31114	ENSMUSG00000021684	-0.404805	4.21491	4.26672	0.0388659	0.217579
Zfp568	17856	ENSMUSG00000074221	-0.368858	4.73752	4.26964	0.0387991	0.217579
Ptprc	1353	ENSMUSG00000026395	-0.363177	7.27181	4.26902	0.0388133	0.217579
Lrrfip2	26794	ENSMUSG00000032497	-0.366271	5.83893	4.25828	0.0390594	0.218313
Ddx5	29518	ENSMUSG00000020719	-0.271149	10.272	4.24655	0.0393303	0.219282
Stx3	38251	ENSMUSG00000041488	-0.401412	4.15388	4.2452	0.0393615	0.219347
mt-Co2	39159	ENSMUSG00000064354	-0.265344	12.8278	4.24399	0.0393895	0.219395
Psmd11	28679	ENSMUSG00000017428	-0.322567	8.18193	4.23951	0.0394935	0.219865
Phf11d	24646	ENSMUSG00000068245	-1.02213	5.80585	4.23767	0.0395363	0.219994
Rhog	19161	ENSMUSG00000073982	-0.431039	6.81878	4.22687	0.0397887	0.22107
2810055G20Rik	34798	ENSMUSG00000090386	-0.401134	4.25284	4.21201	0.0401388	0.222685
Il18bp	19153	ENSMUSG00000070427	-0.659731	0.901274	4.20815	0.0402301	0.222898
Rpf2	20474	ENSMUSG00000038510	-0.390935	6.76622	4.20788	0.0402367	0.222898
Tifab	30719	ENSMUSG00000049625	-0.390758	4.08216	4.20847	0.0402227	0.222898
Snapc4	2542	ENSMUSG00000036281	-0.352966	5.44933	4.20081	0.0404047	0.223719
Rrp9	26606	ENSMUSG00000041506	-0.386706	6.55037	4.19778	0.040477	0.224009
Tcam1	29504	ENSMUSG00000020712	-0.490511	3.0731	4.18883	0.0406913	0.224973
H2-Q5	35888	ENSMUSG00000055413	-0.506514	3.06274	4.18494	0.0407845	0.225267
Igsf6	19642	ENSMUSG00000035004	-0.356495	6.68762	4.1791	0.0409254	0.225934
Tnip3	15650	ENSMUSG00000044162	-0.344942	7.01711	4.17753	0.0409635	0.226033
Zfp78	17053	ENSMUSG00000055150	-0.705746	0.0611636	4.17472	0.0410313	0.226296
Mlkl	23116	ENSMUSG00000012519	-0.602769	3.70115	4.17206	0.0410958	0.226333
Lacc1	24899	ENSMUSG00000044350	-0.689115	0.729107	4.17102	0.0411209	0.226346
Trafd1	14268	ENSMUSG00000042726	-1.04375	6.276	4.16951	0.0411576	0.226437
P2rx4	14310	ENSMUSG00000029470	-0.394821	3.64152	4.16304	0.0413151	0.22686
Kdm5b	1285	ENSMUSG00000042207	-0.724105	1.66769	4.15064	0.0416188	0.228193
Pofut2	20843	ENSMUSG00000020260	-0.39352	6.63955	4.15132	0.041602	0.228193
Hk2	15890	ENSMUSG00000000628	-0.375206	6.6524	4.13141	0.0420942	0.229902
Tcof1	37631	ENSMUSG00000024613	-0.407074	8.36166	4.1305	0.042117	0.229915
Serpinb1b	30430	ENSMUSG00000051029	-0.557961	1.86643	4.12881	0.0421589	0.230032
Lnx2	14791	ENSMUSG00000016520	-0.354713	4.91954	4.08944	0.043152	0.233943
Rc3h2	2897	ENSMUSG00000075376	-0.350666	5.48377	4.08827	0.0431819	0.233943
Sra1	37381	ENSMUSG00000006050	-0.347518	5.63327	4.08676	0.0432203	0.234006
Rem2	24493	ENSMUSG00000022176	-0.672876	0.581026	4.0841	0.0432885	0.234254
Cd33	18153	ENSMUSG00000004609	-0.400974	3.80526	4.07295	0.0435751	0.235247
Klhdc8b	26693	ENSMUSG00000032609	-0.695495	0.374721	4.07046	0.0436393	0.235412
Snora75	847	ENSMUSG00000064837	-0.610243	1.00267	4.05118	0.0441406	0.237388
Rbm3os	5813	ENSMUSG00000055188	-0.707715	-0.104834	4.04402	0.044328	0.237827
Lrp10	24492	ENSMUSG00000022175	-0.358744	6.53079	4.01125	0.0451976	0.241455
Fam189b	9013	ENSMUSG00000032657	-0.512799	2.38132	4.00867	0.0452668	0.241595
Wnt10b	33711	ENSMUSG00000022996	-0.682804	0.404172	3.99959	0.0455112	0.242253
Rhbdf1	27445	ENSMUSG00000020282	-0.506429	2.84229	4.00137	0.0454633	0.242253
Ddx24	32239	ENSMUSG00000041645	-0.505517	7.59735	4.00115	0.0454692	0.242253
Gm10499	35954	ENSMUSG00000073403	-0.466939	2.6192	3.99835	0.0455448	0.242253
Pabpc1	32921	ENSMUSG00000022283	-0.287269	11.2967	3.99769	0.0455626	0.242253
Nampt	31598	ENSMUSG00000020572	-0.481569	7.10491	3.99371	0.0456704	0.242673
Arhgef4	250	ENSMUSG00000037509	-0.565971	1.55244	3.98405	0.0459329	0.243531
St3gal3	11693	ENSMUSG00000028538	-0.355709	4.28175	3.97635	0.0461434	0.244366
Wdfy1	760	ENSMUSG00000073643	-0.364142	4.96644	3.96961	0.0463285	0.244935
Eml2	17445	ENSMUSG00000040811	-0.375939	5.22525	3.95174	0.0468229	0.247024
C130026I21Rik	800	ENSMUSG00000052477	-0.613016	5.21956	3.94874	0.0469065	0.247105
Rbm47	13477	ENSMUSG00000070780	-0.415524	4.75502	3.94844	0.0469147	0.247105
null	9057	ENSMUSG00000078667	-0.45255	3.19581	3.93979	0.0471566	0.247953
Pex26	16383	ENSMUSG00000067825	-0.419582	3.24781	3.93187	0.0473792	0.248735
Ift57	34631	ENSMUSG00000032965	-0.354876	4.47225	3.93026	0.0474247	0.248858
P2ry2	19128	ENSMUSG00000032860	-0.592411	2.13247	3.92531	0.0475643	0.249009
4933426M11Rik	31970	ENSMUSG00000021133	-0.35624	5.76332	3.91523	0.0478505	0.249925
Anxa4	16000	ENSMUSG00000029994	-0.351409	6.87393	3.91615	0.0478243	0.249925
Gm23130	20329	ENSMUSG00000077440	-0.524746	3.14305	3.91174	0.04795	0.25014
Fam177a	31724	ENSMUSG00000095595	-0.346846	4.75797	3.90833	0.0480474	0.25014
Gm26901	32	ENSMUSG00000097797	-0.63161	0.788174	3.90419	0.0481659	0.25042
Sqrdl	4386	ENSMUSG00000005803	-0.648048	1.1748	3.88911	0.0486003	0.252254
Aim2	1775	ENSMUSG00000037860	-0.502135	5.94203	3.88721	0.0486553	0.252254
Ifngr2	34931	ENSMUSG00000022965	-0.337744	7.56693	3.888	0.0486324	0.252254
Stambpl1	38520	ENSMUSG00000024776	-0.409655	5.75447	3.88153	0.04882	0.252991
Lgals3bp	29796	ENSMUSG00000033880	-0.662639	7.67765	3.87815	0.0489185	0.253048
Ms4a6c	38235	ENSMUSG00000079419	-0.487394	5.37548	3.8679	0.0492181	0.25435
Paf1	17790	ENSMUSG00000003437	-0.392701	7.05215	3.86397	0.0493333	0.254622
Zfp146	17864	ENSMUSG00000037029	-0.354996	6.35327	3.86379	0.0493387	0.254622
Rfxank	22441	ENSMUSG00000036120	-0.410744	3.50169	3.85183	0.0496919	0.255857
Lrrc39	9626	ENSMUSG00000027961	-0.613211	1.81534	3.84731	0.0498258	0.255961
Gas5	1527	ENSMUSG00000053332	-0.298483	8.3716	3.84875	0.0497832	0.255961
Krit1	12867	ENSMUSG00000000600	-0.349907	4.96877	3.83576	0.0501702	0.257494
Chmp4b	4986	ENSMUSG00000038467	-0.434643	7.45601	3.82109	0.0506113	0.259167
Brwd3	7397	ENSMUSG00000063663	-0.344482	4.39066	3.81865	0.0506849	0.25919
Lck	12012	ENSMUSG00000000409	-0.681222	2.06884	3.79938	0.0512714	0.261778
Gm16754	25346	ENSMUSG00000097439	-0.594768	1.60827	3.80048	0.0512378	0.261778
Tln1	10539	ENSMUSG00000028465	-0.311473	9.64133	3.79772	0.0513225	0.261854
Sh2d3c	2766	ENSMUSG00000059013	-0.654754	0.745499	3.79674	0.0513525	0.261889
BC024978	17736	ENSMUSG00000078786	-0.419742	3.19767	3.79549	0.051391	0.261966
Tiam1	34897	ENSMUSG00000002489	-0.348497	4.55746	3.78874	0.0515986	0.262786
Mthfr	12611	ENSMUSG00000029009	-0.495337	4.85892	3.7879	0.0516244	0.262798
Amt	26684	ENSMUSG00000032607	-0.664691	0.525246	3.77679	0.0519683	0.26419
Myd88	26881	ENSMUSG00000032508	-0.42001	6.58858	3.77564	0.0520041	0.264213
Atp6v1d	31938	ENSMUSG00000021114	-0.393046	5.44976	3.77513	0.0520199	0.264213
Hao1	4629	ENSMUSG00000027261	-0.549878	1.51619	3.75324	0.0527052	0.26673
BC051226	35731	ENSMUSG00000092564	-0.722584	0.965382	3.75035	0.0527963	0.26695
Znrd1	36016	ENSMUSG00000036315	-0.345345	4.60174	3.74789	0.0528743	0.267225
Csprs	39079	ENSMUSG00000062783	-1.3823	2.76491	3.73746	0.0532052	0.268414
Ctsb	24708	ENSMUSG00000021939	-0.262434	10.081	3.73526	0.0532755	0.268648
Rc3h1	1524	ENSMUSG00000040423	-0.339715	6.1498	3.72201	0.0536997	0.270423
Rpl19-ps11	21914	ENSMUSG00000081094	-0.492934	5.45744	3.72083	0.0537375	0.270442
Ptch1	30827	ENSMUSG00000021466	-0.363536	4.23642	3.7204	0.0537516	0.270442
Fam219a	10449	ENSMUSG00000028439	-0.510459	2.00984	3.7103	0.0540776	0.271839
Rbm41	7796	ENSMUSG00000031433	-0.430438	3.08623	3.70576	0.054225	0.271912
Dcun1d2	21840	ENSMUSG00000038506	-0.354354	5.21979	3.70603	0.0542162	0.271912
Tppp3	22976	ENSMUSG00000014846	-0.644876	0.717264	3.70388	0.054286	0.271914
Layn	25840	ENSMUSG00000060594	-0.507273	2.63225	3.69721	0.0545037	0.272761
Mid1	8280	ENSMUSG00000035299	-0.623882	2.96103	3.69625	0.054535	0.272796
Gm13470	2985	ENSMUSG00000086644	-0.715661	0.252018	3.69414	0.054604	0.272928
Erich1	21860	ENSMUSG00000051978	-0.402713	3.37661	3.69297	0.0546423	0.272928
Trim26	36007	ENSMUSG00000024457	-0.537868	6.35813	3.69076	0.0547147	0.27302
Atp2b4	1261	ENSMUSG00000026463	-0.350543	6.15962	3.69043	0.0547254	0.27302
Prkacb	9900	ENSMUSG00000005034	-0.344358	6.34483	3.68256	0.0549843	0.273859
Mvp	19751	ENSMUSG00000030681	-0.378711	6.17106	3.6774	0.0551549	0.274432
Cyfip1	18402	ENSMUSG00000030447	-0.288533	8.22838	3.67777	0.0551426	0.274432
Pml	25967	ENSMUSG00000036986	-0.949609	5.5047	3.6761	0.0551977	0.274523
Cdk12	29124	ENSMUSG00000003119	-0.34453	5.96637	3.66947	0.0554177	0.27513
Asb1	949	ENSMUSG00000026311	-0.368285	3.55358	3.66595	0.0555349	0.275449
Syvn1	38039	ENSMUSG00000024807	-0.438714	6.2991	3.64898	0.0561035	0.277452
Pex5	16460	ENSMUSG00000005069	-0.332796	5.48205	3.64886	0.0561074	0.277452
Tagln	25777	ENSMUSG00000032085	-0.551813	1.51048	3.64063	0.0563856	0.27846
Idnk	30742	ENSMUSG00000050002	-0.405641	3.1276	3.63873	0.0564499	0.278533
Nfe2l1	29049	ENSMUSG00000038615	-0.313589	7.41155	3.63878	0.0564482	0.278533
Gm10163	26386	ENSMUSG00000066443	-0.425389	5.5742	3.63497	0.0565778	0.278918
A230004M16Rik	27535	ENSMUSG00000087306	-0.589629	1.52133	3.61543	0.0572459	0.281292
Zbtb37	1526	ENSMUSG00000043467	-0.446602	2.55214	3.61319	0.057323	0.281481
Gnl2	11897	ENSMUSG00000028869	-0.329229	6.98013	3.59548	0.0579368	0.284247
M6pr	16398	ENSMUSG00000007458	-0.268927	8.98421	3.58471	0.0583135	0.285597
Gm26782	24223	ENSMUSG00000097431	-0.585904	0.733474	3.57794	0.0585519	0.286389
Ppp1r11	36015	ENSMUSG00000036398	-0.373052	6.27576	3.56415	0.05904	0.2879
Gm4617	9699	ENSMUSG00000096544	-0.541811	1.38867	3.56086	0.0591569	0.28822
H2-Q4	35887	ENSMUSG00000035929	-0.409695	5.73336	3.55011	0.0595414	0.289182
Zglp1	25338	ENSMUSG00000079681	-0.625457	0.975031	3.54649	0.0596716	0.289348
Enthd2	29841	ENSMUSG00000025377	-0.332441	4.47776	3.54067	0.0598811	0.289989
Slc41a1	1217	ENSMUSG00000013275	-0.326478	4.62576	3.5345	0.0601046	0.290695
Zfand3	35627	ENSMUSG00000044477	-0.351294	5.90917	3.52636	0.0604001	0.291748
Ccdc88b	38082	ENSMUSG00000047810	-0.40967	7.12639	3.52455	0.0604663	0.291817
Gm10184	36660	ENSMUSG00000066878	-0.694518	0.0485123	3.52357	0.0605019	0.291863
Efnb1	7156	ENSMUSG00000031217	-0.470537	2.31829	3.52168	0.060571	0.291946
S1pr2	25330	ENSMUSG00000043895	-0.369902	3.91327	3.50411	0.0612166	0.293923
Zfp566	17860	ENSMUSG00000078768	-0.43049	2.71311	3.50206	0.0612924	0.294101
Arpc5	1440	ENSMUSG00000008475	-0.275683	8.76448	3.49335	0.0616159	0.295336
Nle1	28715	ENSMUSG00000020692	-0.365557	6.25421	3.48597	0.061891	0.296249
Amfr	22837	ENSMUSG00000031751	-0.332317	6.7456	3.4847	0.0619388	0.296249
Gm4202	9129	ENSMUSG00000091421	-0.515235	1.72015	3.47994	0.0621172	0.296726
Dip2c	29990	ENSMUSG00000048264	-0.338408	5.08871	3.47127	0.0624435	0.297646
Erdr1	37081	ENSMUSG00000096768	-0.442637	6.55016	3.46892	0.0625323	0.297823
Kcnn4	17635	ENSMUSG00000054342	-0.29555	8.40207	3.46457	0.0626966	0.298353
Gabarapl1	16609	ENSMUSG00000030161	-0.330598	5.9927	3.46183	0.0628008	0.298723
Hectd1	31690	ENSMUSG00000035247	-0.304202	7.4483	3.45302	0.0631362	0.299729
9330175E14Rik	22852	ENSMUSG00000097194	-0.732124	1.80619	3.44635	0.0633916	0.300769
Adcy7	22789	ENSMUSG00000031659	-0.272893	8.68885	3.43726	0.0637414	0.302301
Gm12655	11235	ENSMUSG00000087128	-0.654932	-0.103932	3.4301	0.0640183	0.303358
Rac2	33334	ENSMUSG00000033220	-0.318381	9.02447	3.42663	0.0641529	0.303732
Pnpt1	27388	ENSMUSG00000020464	-0.418617	6.54201	3.41613	0.0645622	0.304524
Ccr2	26981	ENSMUSG00000049103	-0.494196	1.90166	3.4091	0.0648378	0.305567
Cdc42ep4	29621	ENSMUSG00000041598	-0.338366	5.16765	3.40323	0.065069	0.306399
Zcchc6	30766	ENSMUSG00000035248	-0.346024	5.46083	3.40231	0.0651052	0.306424
Mpc1-ps	32461	ENSMUSG00000091498	-0.606884	0.487213	3.39686	0.0653206	0.306557
Fam207a	20845	ENSMUSG00000032977	-0.334724	5.47046	3.39695	0.0653171	0.306557
Ptger4	32741	ENSMUSG00000039942	-0.370907	4.01918	3.38897	0.0656338	0.30777
Fam222b	28593	ENSMUSG00000037750	-0.355891	5.06504	3.38486	0.0657976	0.308409
Sertad2	27262	ENSMUSG00000049800	-0.346071	5.28706	3.38417	0.0658252	0.30841
Gdpd1	28830	ENSMUSG00000061666	-0.559294	1.06542	3.38067	0.0659654	0.308756
2810474O19Rik	16904	ENSMUSG00000032712	-0.346334	5.72803	3.37954	0.0660105	0.308756
Mcur1	30543	ENSMUSG00000021371	-0.322985	5.03366	3.37889	0.0660364	0.308756
Vcpip1	47	ENSMUSG00000045210	-0.341068	5.7767	3.37646	0.0661339	0.309083
Aff4	27784	ENSMUSG00000049470	-0.318807	5.96752	3.37368	0.0662458	0.30938
Slc29a3	20657	ENSMUSG00000020100	-0.384477	4.4014	3.35981	0.0668059	0.311517
4930503L19Rik	37749	ENSMUSG00000044906	-0.363514	3.5105	3.35943	0.066821	0.311517
Med31	28382	ENSMUSG00000020801	-0.42595	3.09307	3.3568	0.0669278	0.311886
Ankrd34a	9319	ENSMUSG00000049097	-0.419437	3.1784	3.35445	0.0670237	0.312074
Cep120	37568	ENSMUSG00000048799	-0.330397	4.92477	3.35493	0.067004	0.312074
Lsg1	34351	ENSMUSG00000022538	-0.320899	6.25635	3.35332	0.0670697	0.312159
H2-Q2	35884	ENSMUSG00000091705	-0.486865	2.86115	3.34906	0.0672432	0.312707
4933423P22Rik	3814	ENSMUSG00000085471	-0.634961	0.346071	3.34639	0.0673526	0.31278
Sdc1	31424	ENSMUSG00000020592	-0.401479	5.20277	3.34596	0.0673702	0.31278
Ldlr	25369	ENSMUSG00000032193	-0.350653	6.87288	3.34791	0.0672904	0.31278
Psme3	29319	ENSMUSG00000078652	-0.280657	8.34928	3.34445	0.0674322	0.312939
P4ha1	20634	ENSMUSG00000019916	-0.324773	6.99445	3.33973	0.0676259	0.313102
Gm14005	4466	ENSMUSG00000074813	-0.509581	2.73363	3.3284	0.0680933	0.314578
Mtf2	13958	ENSMUSG00000029267	-0.328234	5.56962	3.31613	0.0686031	0.316271
Diexf	2001	ENSMUSG00000016181	-0.307435	6.13831	3.31552	0.0686286	0.316271
Smarcd3	13067	ENSMUSG00000028949	-0.532991	1.2558	3.31267	0.0687477	0.316561
Vps37c	38210	ENSMUSG00000048832	-0.414688	5.04994	3.3106	0.0688342	0.316729
Rnf183	10902	ENSMUSG00000063851	-0.391291	3.82665	3.31045	0.0688406	0.316729
Zcchc10	27782	ENSMUSG00000018239	-0.318895	4.69021	3.3018	0.0692038	0.318139
Eea1	21262	ENSMUSG00000036499	-0.313961	6.08877	3.29825	0.0693539	0.318309
Med12	7199	ENSMUSG00000079487	-0.31751	5.97548	3.29641	0.0694314	0.318404
Uba6	13637	ENSMUSG00000035898	-0.31233	5.34143	3.28918	0.0697378	0.319549
Gpr124	22100	ENSMUSG00000031486	-0.614434	0.266979	3.28601	0.0698726	0.319596
Gtf3c6	20475	ENSMUSG00000019837	-0.343819	5.50926	3.28559	0.0698903	0.319596
Nab1	413	ENSMUSG00000002881	-0.338225	6.77063	3.28696	0.0698321	0.319596
Usp35	19041	ENSMUSG00000035713	-0.549449	0.928782	3.27624	0.0702896	0.320639
Plk3	11655	ENSMUSG00000028680	-0.323676	5.20471	3.27146	0.0704951	0.321446
Akap13	18760	ENSMUSG00000066406	-0.368759	6.72397	3.26979	0.0705666	0.321642
Zfp235	17623	ENSMUSG00000047603	-0.503536	1.62741	3.26631	0.0707165	0.322194
Eif5a	28284	ENSMUSG00000078812	-0.271521	11.1046	3.26241	0.070885	0.322704
Myh9	33309	ENSMUSG00000022443	-0.251807	9.40034	3.24267	0.0717438	0.326033
Plekhg6	16520	ENSMUSG00000038167	-0.654095	0.179783	3.23889	0.0719095	0.326571
Zfp619	18068	ENSMUSG00000068959	-0.490866	1.79454	3.23263	0.0721848	0.327028
Nfkbil1	35871	ENSMUSG00000042419	-0.40653	5.24703	3.2327	0.0721815	0.327028
Ttc19	28082	ENSMUSG00000042298	-0.348655	4.67002	3.21828	0.0728202	0.328979
Xrn1	26466	ENSMUSG00000032410	-0.329184	4.1011	3.21891	0.072792	0.328979
Hook2	22720	ENSMUSG00000052566	-0.352264	3.82813	3.21548	0.0729449	0.329277
Znrf3	27077	ENSMUSG00000041961	-0.36118	4.43836	3.20659	0.0733423	0.33054
Rab3ip	21411	ENSMUSG00000064181	-0.329817	4.5232	3.20548	0.0733921	0.330632
1700058P15Rik	17451	ENSMUSG00000089636	-0.50868	1.50672	3.20263	0.0735198	0.33081
Tma16	22380	ENSMUSG00000025591	-0.303273	6.02798	3.19714	0.0737671	0.331782
Hsp90ab1	36182	ENSMUSG00000023944	-0.25577	11.7629	3.1904	0.074072	0.332629
Pikfyve	600	ENSMUSG00000025949	-0.358737	3.98915	3.18717	0.0742183	0.332915
Acot9	8092	ENSMUSG00000025287	-0.322556	5.57788	3.18802	0.0741798	0.332915
Ensa	9252	ENSMUSG00000038619	-0.315908	6.69226	3.18703	0.0742245	0.332915
Mtf1	11886	ENSMUSG00000028890	-0.321179	4.85146	3.17532	0.0747585	0.334908
Abcc4	25076	ENSMUSG00000032849	-0.302216	7.13824	3.17284	0.074872	0.335283
Slc25a37	24798	ENSMUSG00000034248	-0.304279	6.13545	3.16864	0.0750651	0.33588
Tec	13538	ENSMUSG00000029217	-0.32086	5.36128	3.16681	0.075149	0.336122
C920009B18Rik	20314	ENSMUSG00000097352	-0.365878	3.83631	3.16263	0.0753419	0.336583
Lpcat3	16468	ENSMUSG00000004270	-0.344475	5.56122	3.16317	0.0753166	0.336583
Phtf2	12991	ENSMUSG00000039987	-0.328461	5.75116	3.15854	0.0755309	0.337159
Pigv	12150	ENSMUSG00000043257	-0.367159	3.70014	3.15587	0.0756544	0.337443
Pex11a	18794	ENSMUSG00000030545	-0.394187	2.90417	3.15097	0.0758817	0.338054
Tmem63b	36188	ENSMUSG00000036026	-0.311636	4.52698	3.13906	0.0764379	0.340262
Lyn	10003	ENSMUSG00000042228	-0.326507	7.31577	3.13527	0.0766156	0.340918
Sp140	823	ENSMUSG00000070031	-0.794201	4.61619	3.13115	0.0768094	0.341194
Oas1c	14254	ENSMUSG00000001166	-0.705828	2.31626	3.13001	0.0768632	0.341194
Gas2l3	21179	ENSMUSG00000074802	-0.317304	5.85955	3.13081	0.0768256	0.341194
Stam	2284	ENSMUSG00000026718	-0.316075	4.54692	3.13027	0.0768509	0.341194
H2-T22	35941	ENSMUSG00000056116	-0.607809	3.80076	3.12546	0.0770782	0.341894
Rps26	21605	ENSMUSG00000025362	-0.291174	9.43518	3.12239	0.0772233	0.3423
Gdap10	31599	ENSMUSG00000096954	-0.678408	0.294824	3.11771	0.0774454	0.342307
AC133103.1	39050	ENSMUSG00000079190	-0.465987	5.19709	3.11957	0.077357	0.342307
Slc7a7	24488	ENSMUSG00000000958	-0.432335	3.12114	3.11893	0.0773877	0.342307
Bet1l	19982	ENSMUSG00000025484	-0.320468	3.84094	3.11802	0.0774306	0.342307
Stk3	32901	ENSMUSG00000022329	-0.305294	5.30628	3.11403	0.0776205	0.342811
Ero1l	24122	ENSMUSG00000021831	-0.302283	7.14997	3.11116	0.0777577	0.343266
AI504432	9504	ENSMUSG00000056145	-0.372003	3.22873	3.10732	0.0779409	0.343686
Eaf1	23858	ENSMUSG00000021890	-0.317447	7.13316	3.1029	0.078153	0.344486
Magi2	12984	ENSMUSG00000040003	-0.457119	2.06703	3.09974	0.078305	0.344886
Ifrd1	31649	ENSMUSG00000001627	-0.294068	7.36254	3.09746	0.0784146	0.345233
Irgq	17641	ENSMUSG00000041037	-0.324034	3.76283	3.09619	0.0784759	0.345368
Dcp1a	23824	ENSMUSG00000021962	-0.302091	5.61969	3.08355	0.0790877	0.346703
Gm20204	23172	ENSMUSG00000098148	-0.324494	5.07912	3.08185	0.0791703	0.346929
Kdm7a	15236	ENSMUSG00000042599	-0.397445	6.10644	3.08096	0.0792136	0.346984
Ptpla	2282	ENSMUSG00000063275	-0.362391	3.22746	3.07961	0.0792793	0.347119
Ptcd1	14753	ENSMUSG00000029624	-0.401457	4.33664	3.07816	0.0793504	0.347159
null	17769	ENSMUSG00000074608	-0.588173	0.877124	3.07643	0.0794347	0.347276
Gtf2ird2	14456	ENSMUSG00000015942	-0.305192	4.7941	3.07263	0.0796206	0.347413
Flnc	15084	ENSMUSG00000068699	-0.459358	3.65768	3.06608	0.0799421	0.348191
Cyth1	29790	ENSMUSG00000017132	-0.313033	4.53555	3.06243	0.0801216	0.348652
Gm17383	37846	ENSMUSG00000058625	-0.788057	0.752905	3.06121	0.0801818	0.348778
Ube2d3	9789	ENSMUSG00000078578	-0.257889	8.84533	3.00862	0.0828226	0.357773
Cbwd1	38425	ENSMUSG00000024878	-0.302428	4.69445	3.0078	0.0828649	0.357819
Sh3tc1	13277	ENSMUSG00000036553	-0.301371	5.9632	3.00246	0.083138	0.358585
Kcnc3	18215	ENSMUSG00000062785	-0.324669	4.30663	2.99679	0.0834298	0.359567
Prmt6	9589	ENSMUSG00000049300	-0.303558	5.99061	2.99087	0.083735	0.360253
null	35838	ENSMUSG00000091747	-0.26157	8.23878	2.9906	0.0837491	0.360253
Shisa5	26724	ENSMUSG00000025647	-0.413327	7.2466	2.98899	0.0838323	0.360335
Sdccag3	2544	ENSMUSG00000026927	-0.303666	5.786	2.98905	0.0838294	0.360335
Tmem120a	14506	ENSMUSG00000039886	-0.322585	4.58515	2.98372	0.0841056	0.361072
Diap2	7601	ENSMUSG00000034480	-0.321591	4.75828	2.97491	0.0845649	0.361831
Tlr1	13453	ENSMUSG00000044827	-0.314656	3.81512	2.97487	0.0845667	0.361831
Gspt1	34034	ENSMUSG00000062203	-0.255734	8.57416	2.97579	0.0845188	0.361831
H3f3b	29705	ENSMUSG00000016559	-0.284602	9.9391	2.97343	0.084642	0.361878
Hspa8	25667	ENSMUSG00000015656	-0.231248	11.2002	2.97397	0.0846141	0.361878
Gm24148	848	ENSMUSG00000064696	-0.530387	0.806318	2.961	0.0852951	0.363564
Fcer1g	1698	ENSMUSG00000058715	-0.347022	7.85719	2.93664	0.0865905	0.367102
Pim3	33568	ENSMUSG00000035828	-0.325539	5.47399	2.94166	0.0863219	0.367102
Tti2	22121	ENSMUSG00000031577	-0.314184	4.12862	2.93978	0.0864225	0.367102
Tmbim1	680	ENSMUSG00000006301	-0.298929	6.86169	2.93816	0.0865093	0.367102
Hsph1	14841	ENSMUSG00000029657	-0.251778	8.58687	2.93752	0.0865435	0.367102
Tgm2	5106	ENSMUSG00000037820	-0.460135	3.68591	2.93185	0.0868479	0.367258
Rbm8a	9322	ENSMUSG00000038374	-0.289463	8.14458	2.93347	0.0867609	0.367258
Gm10052	26971	ENSMUSG00000058922	-0.312941	3.83879	2.92604	0.0871612	0.367973
Mb21d1	26299	ENSMUSG00000032344	-0.345974	6.32223	2.92291	0.0873301	0.368257
6530402F18Rik	2634	ENSMUSG00000079499	-0.698314	0.615351	2.92004	0.0874859	0.368707
Fars2	30483	ENSMUSG00000021420	-0.304574	4.61446	2.91198	0.0879238	0.369721
Ugcg	10825	ENSMUSG00000028381	-0.291544	4.90177	2.90666	0.0882143	0.370526
Mtfmt	26081	ENSMUSG00000059183	-0.304319	4.77661	2.90478	0.0883171	0.370738
Tbc1d10a	27045	ENSMUSG00000034412	-0.34096	4.03541	2.89837	0.0886693	0.371466
Hnrnpul1	17700	ENSMUSG00000040725	-0.286868	8.36609	2.89839	0.0886683	0.371466
Rps6ka2	35070	ENSMUSG00000023809	-0.603611	1.51174	2.89643	0.0887762	0.371637
Spag9	28939	ENSMUSG00000020859	-0.307834	6.34779	2.89218	0.0890102	0.372062
Cpne8	33613	ENSMUSG00000052560	-0.315282	6.4804	2.88711	0.0892908	0.372577
Dnal1	32023	ENSMUSG00000042523	-0.557382	1.53686	2.88026	0.0896716	0.3733
Dqx1	15899	ENSMUSG00000009145	-0.506759	1.44675	2.87887	0.0897489	0.373402
Dnajc11	12706	ENSMUSG00000039768	-0.29032	7.47762	2.87202	0.0901319	0.374384
4930518I15Rik	5071	ENSMUSG00000074629	-0.562375	0.265689	2.87021	0.0902334	0.374667
Zfp747	19776	ENSMUSG00000054381	-0.357801	3.16947	2.86826	0.0903425	0.374843
Trp53bp2	1899	ENSMUSG00000026510	-0.321341	3.81803	2.8664	0.090447	0.375004
Yrdc	11889	ENSMUSG00000028889	-0.322643	6.35614	2.8643	0.0905651	0.375351
Sfr1	38774	ENSMUSG00000025066	-0.321404	6.90336	2.86057	0.0907751	0.375717
Per2	947	ENSMUSG00000055866	-0.532705	0.813222	2.85613	0.0910265	0.376431
3010003L21Rik	16891	ENSMUSG00000085355	-0.549217	0.954463	2.85484	0.0910994	0.376502
Rbm25	32008	ENSMUSG00000010608	-0.266207	8.0918	2.85029	0.0913576	0.377106
Dnttip2	9673	ENSMUSG00000039756	-0.284158	7.51963	2.84793	0.0914915	0.377381
Gm26981	19013	ENSMUSG00000098041	-0.53261	0.552103	2.84332	0.0917544	0.378319
Sgip1	11372	ENSMUSG00000028524	-0.309098	4.26337	2.83861	0.0920236	0.378881
Rnf31	24548	ENSMUSG00000047098	-0.353306	4.82284	2.838	0.0920586	0.378887
Fbrs	19785	ENSMUSG00000042423	-0.330447	6.53982	2.83637	0.0921523	0.379056
Crebbp	33934	ENSMUSG00000022521	-0.291942	5.3199	2.83611	0.0921673	0.379056
Mphosph6	23180	ENSMUSG00000031843	-0.308796	5.75016	2.83487	0.0922382	0.379209
Olfr920	25597	ENSMUSG00000061039	-0.583042	0.189222	2.83194	0.0924065	0.379623
Gm26873	35194	ENSMUSG00000097379	-0.55032	0.770787	2.82938	0.0925539	0.380079
Hilpda	15076	ENSMUSG00000043421	-0.418645	3.36307	2.82571	0.0927658	0.380265
Fdft1	24709	ENSMUSG00000021273	-0.33133	5.0158	2.82579	0.0927614	0.380265
Baz2a	21567	ENSMUSG00000040054	-0.292155	5.95985	2.81029	0.0936616	0.383378
Smap2	11790	ENSMUSG00000032870	-0.324147	6.04945	2.80758	0.0938198	0.383606
Tnfsf9	36391	ENSMUSG00000035678	-0.299258	4.94433	2.80778	0.0938084	0.383606
Thg1l	27587	ENSMUSG00000011254	-0.321926	6.14897	2.8023	0.0941291	0.384312
Ncl	846	ENSMUSG00000026234	-0.209321	11.6657	2.7981	0.0943762	0.385041
Mn1	14051	ENSMUSG00000070576	-0.548119	0.877879	2.79643	0.0944744	0.385116
Thap1	22094	ENSMUSG00000037214	-0.38236	2.90198	2.79534	0.0945388	0.385116
Nxf1	38148	ENSMUSG00000010097	-0.273119	7.46486	2.79545	0.094532	0.385116
App	34833	ENSMUSG00000022892	-0.25305	8.13151	2.79334	0.0946569	0.385298
N4bp1	22761	ENSMUSG00000031652	-0.395389	6.49553	2.78813	0.0949647	0.385901
Slc6a12	16389	ENSMUSG00000030109	-0.263706	8.32035	2.7868	0.0950438	0.386083
Rgp1	10542	ENSMUSG00000028468	-0.283033	5.69585	2.77822	0.0955542	0.387038
Klhl18	26767	ENSMUSG00000054792	-0.302864	4.09662	2.77706	0.0956238	0.38718
Csf2ra	38886	ENSMUSG00000059326	-0.318887	7.27705	2.77236	0.0959045	0.387656
Atxn2	14281	ENSMUSG00000042605	-0.283855	6.09226	2.77221	0.0959137	0.387656
Cldn25	34696	ENSMUSG00000022744	-0.301165	5.25873	2.76955	0.096073	0.38802
Dnal4	33387	ENSMUSG00000022420	-0.325804	4.55218	2.76724	0.0962122	0.388025
Ak4	11355	ENSMUSG00000028527	-0.316001	4.46963	2.76736	0.0962047	0.388025
Fam208b	29944	ENSMUSG00000033799	-0.299775	5.82979	2.76885	0.0961153	0.388025
Vezf1	28878	ENSMUSG00000018377	-0.288473	5.54647	2.7659	0.0962928	0.388125
Bst2	22509	ENSMUSG00000046718	-0.455778	6.71628	2.76401	0.0964065	0.388251
Pfkp	29972	ENSMUSG00000021196	-0.285114	7.33074	2.75723	0.0968155	0.389062
Degs1	1895	ENSMUSG00000038633	-0.283864	7.48723	2.75754	0.096797	0.389062
Arv1	23393	ENSMUSG00000031982	-0.397418	2.45315	2.75597	0.0968919	0.389091
Eif3j1	4358	ENSMUSG00000027236	-0.299165	6.74306	2.755	0.096951	0.389189
Cacnb1	29114	ENSMUSG00000020882	-0.583983	0.328634	2.74586	0.0975068	0.390189
Ss18l1	5587	ENSMUSG00000039086	-0.420583	2.20892	2.74726	0.0974214	0.390189
Pcf11	19012	ENSMUSG00000041328	-0.291318	5.87334	2.74469	0.0975782	0.390313
Sepw1	17351	ENSMUSG00000041571	-0.401474	5.0764	2.73838	0.0979642	0.3913
Tnip2	13251	ENSMUSG00000059866	-0.28436	4.80883	2.73924	0.0979114	0.3913
Dnajb2	721	ENSMUSG00000026203	-0.421424	2.73278	2.72416	0.0988402	0.39368
Gm9493	38405	ENSMUSG00000044424	-0.644872	0.692046	2.72195	0.0989768	0.393945
Rhbdd2	14501	ENSMUSG00000039917	-0.298123	4.3249	2.72239	0.0989496	0.393945
Rad23b	10760	ENSMUSG00000028426	-0.244769	8.9967	2.71705	0.0992815	0.394598
Cdkl2	13728	ENSMUSG00000029403	-0.410198	2.27573	2.71448	0.0994417	0.394956
Atp1a3	17664	ENSMUSG00000040907	-0.272401	7.3958	2.71346	0.0995052	0.395068
Gm21092	21930	ENSMUSG00000095403	-0.313118	6.48059	2.7115	0.0996271	0.395134
Mapk8ip3	35428	ENSMUSG00000024163	-0.289676	5.85182	2.71233	0.0995754	0.395134
Stip1	38099	ENSMUSG00000024966	-0.268767	8.30191	2.7095	0.0997524	0.395491
null	31727	ENSMUSG00000021020	-0.294949	4.63733	2.70512	0.100027	0.39603
Riok1	30491	ENSMUSG00000021428	-0.292181	5.4603	2.70361	0.100121	0.396255
Stau1	5317	ENSMUSG00000039536	-0.293168	5.75236	2.69818	0.100463	0.397326
Zfp658	18154	ENSMUSG00000056592	-0.469247	1.54016	2.69575	0.100616	0.397792
Fam210b	5420	ENSMUSG00000027495	-0.43304	2.57036	2.69137	0.100893	0.398201
2310047M10Rik	28211	ENSMUSG00000045176	-0.342453	3.30702	2.69294	0.100794	0.398201
Mov10	9471	ENSMUSG00000002227	-0.70327	5.59684	2.68202	0.101487	0.398775
Rnf214	25774	ENSMUSG00000042790	-0.325135	4.25586	2.68597	0.101236	0.398775
Snrpd3	20791	ENSMUSG00000020180	-0.294812	7.71715	2.68218	0.101477	0.398775
Cwc25	29099	ENSMUSG00000018541	-0.285244	4.64558	2.68131	0.101532	0.398775
Bahcc1	29848	ENSMUSG00000039741	-0.284053	5.30595	2.68326	0.101408	0.398775
Cfl1	38002	ENSMUSG00000056201	-0.243887	10.7256	2.68235	0.101466	0.398775
Dnajb13	19114	ENSMUSG00000030708	-0.499279	1.01837	2.67814	0.101734	0.399377
Hmgxb3	37641	ENSMUSG00000024622	-0.29474	5.05846	2.67445	0.10197	0.399377
Rps6	11115	ENSMUSG00000028495	-0.255202	10.3025	2.67436	0.101976	0.399377
Rbpj	13409	ENSMUSG00000039191	-0.231716	9.06529	2.67599	0.101872	0.399377
Sppl2a	4429	ENSMUSG00000027366	-0.300144	6.68948	2.6683	0.102366	0.400484
Ccdc94	36335	ENSMUSG00000003208	-0.299428	4.58408	2.66493	0.102582	0.400773
Map2k4	28148	ENSMUSG00000033352	-0.289617	5.84787	2.6594	0.10294	0.401612
Lpgat1	1980	ENSMUSG00000026623	-0.290272	6.73619	2.65516	0.103214	0.402542
Il15ra	2264	ENSMUSG00000023206	-0.443083	2.91942	2.65025	0.103534	0.40309
D19Bwg1357e	38442	ENSMUSG00000041360	-0.276936	7.38841	2.64275	0.104023	0.404575
Grina	33241	ENSMUSG00000022564	-0.406203	5.64015	2.64009	0.104198	0.404974
Tbc1d12	38584	ENSMUSG00000048720	-0.392737	2.49054	2.63915	0.10426	0.405074
Sema6d	4389	ENSMUSG00000027200	-0.466155	3.02429	2.63779	0.104349	0.405227
Stat6	21539	ENSMUSG00000002147	-0.265135	7.60199	2.63465	0.104555	0.405801
Mak16	22122	ENSMUSG00000031578	-0.27052	7.32672	2.63203	0.104728	0.40605
Uqcrb	30873	ENSMUSG00000021520	-0.312118	6.71486	2.6314	0.104769	0.40607
Mrpl39	34827	ENSMUSG00000022889	-0.29959	6.20075	2.6251	0.105186	0.406985
Sdc3	12054	ENSMUSG00000025743	-0.457152	4.41235	2.62296	0.105328	0.407114
Ube2r2	10431	ENSMUSG00000036241	-0.306716	5.98927	2.62135	0.105435	0.407386
Sbds	14440	ENSMUSG00000025337	-0.277213	6.14557	2.61389	0.105932	0.408745
Ecm1	9255	ENSMUSG00000028108	-0.329513	4.41574	2.60529	0.106508	0.410351
Zfhx2	24529	ENSMUSG00000040721	-0.293968	4.09006	2.605	0.106527	0.410351
Camta2	28341	ENSMUSG00000040712	-0.287922	5.85022	2.60353	0.106626	0.410351
Zfp408	3852	ENSMUSG00000075040	-0.282387	4.15656	2.60332	0.10664	0.410351
Swt1	1426	ENSMUSG00000052748	-0.281543	4.09879	2.59967	0.106886	0.410874
Med27	2635	ENSMUSG00000026799	-0.309167	4.51371	2.59849	0.106966	0.411041
Tmem131	278	ENSMUSG00000026116	-0.279737	6.9732	2.59681	0.107079	0.411194
Nifk	1102	ENSMUSG00000026377	-0.26253	7.46062	2.59141	0.107444	0.412265
Gm21887	8286	ENSMUSG00000095562	-0.746345	0.96966	2.59	0.107541	0.412404
Dnajc1	2332	ENSMUSG00000026740	-0.292567	5.18449	2.58423	0.107933	0.413499
A630052C17Rik	27389	ENSMUSG00000086725	-0.522754	1.06041	2.58171	0.108105	0.413915
Nop14	13257	ENSMUSG00000036693	-0.292111	6.7618	2.58151	0.108119	0.413915
Zfp830	28709	ENSMUSG00000046010	-0.289864	4.88412	2.57931	0.108269	0.414349
Syt7	38197	ENSMUSG00000024743	-0.503964	0.772808	2.57626	0.108477	0.414914
Clic1	35844	ENSMUSG00000007041	-0.259873	9.25485	2.57585	0.108506	0.414914
Pinx1	24721	ENSMUSG00000021958	-0.315493	5.26963	2.5703	0.108887	0.415724
Kctd10	14109	ENSMUSG00000001098	-0.298464	4.82386	2.56895	0.10898	0.415936
Rsph1	35645	ENSMUSG00000024033	-0.52747	0.795579	2.56411	0.109314	0.416646
Spen	12397	ENSMUSG00000040761	-0.27572	7.06039	2.56522	0.109238	0.416646
Gm15975	13416	ENSMUSG00000083902	-0.491914	0.993709	2.56345	0.10936	0.41668
Akt1s1	18225	ENSMUSG00000011096	-0.316387	5.88668	2.55604	0.109873	0.418069
Slc25a14	6357	ENSMUSG00000031105	-0.378595	2.52031	2.54749	0.11047	0.419628
Manbal	5090	ENSMUSG00000063019	-0.308908	3.98217	2.54522	0.110629	0.42009
Ik	37388	ENSMUSG00000024474	-0.257465	8.36455	2.54404	0.110711	0.42026
Eif4a2	34286	ENSMUSG00000022884	-0.243716	8.24574	2.54222	0.110839	0.420463
Tmem29	7964	ENSMUSG00000041353	-0.492584	0.930486	2.53769	0.111157	0.420573
Taf1a	1909	ENSMUSG00000072258	-0.295341	3.7582	2.53454	0.111379	0.421092
Zfp109	17626	ENSMUSG00000074283	-0.49789	0.921138	2.53328	0.111468	0.421285
Atf4	33403	ENSMUSG00000042406	-0.264851	7.91066	2.53248	0.111525	0.421359
Zfp605	14011	ENSMUSG00000023284	-0.411509	2.24715	2.52953	0.111733	0.421578
Gm12359	29158	ENSMUSG00000075576	-0.568194	0.3186	2.52877	0.111787	0.421641
Gm15931	16969	ENSMUSG00000081723	-0.502398	0.595114	2.52022	0.112395	0.423284
Slc39a7	35750	ENSMUSG00000024327	-0.299273	3.82847	2.51999	0.112411	0.423284
Themis2	12112	ENSMUSG00000037731	-0.509357	5.74973	2.51454	0.112801	0.424324
Mtmr1	6700	ENSMUSG00000015214	-0.281951	5.50646	2.51316	0.112899	0.424417
C77080	11995	ENSMUSG00000050390	-0.352074	4.46697	2.50891	0.113204	0.425415
Appbp2	28794	ENSMUSG00000018481	-0.278984	6.36988	2.50349	0.113594	0.426025
Map2k1	26053	ENSMUSG00000004936	-0.280606	7.06647	2.5018	0.113716	0.426342
Atp6v1g2	35873	ENSMUSG00000024403	-0.427782	2.14949	2.49794	0.113995	0.426955
Zbtb49	13313	ENSMUSG00000029127	-0.379164	2.36389	2.49691	0.11407	0.426955
Ppa1	20678	ENSMUSG00000020089	-0.275041	7.42012	2.49545	0.114176	0.426962
Ddx21	20699	ENSMUSG00000020075	-0.223093	9.12625	2.49457	0.11424	0.427022
Gdi1	6798	ENSMUSG00000015291	-0.272736	6.15599	2.491	0.114499	0.427435
Rapgef1	2640	ENSMUSG00000039844	-0.271049	7.16509	2.49095	0.114502	0.427435
Ccdc112	37519	ENSMUSG00000071855	-0.439516	1.47986	2.47757	0.115481	0.430372
4921514A10Rik	12379	ENSMUSG00000097620	-0.595882	-0.155264	2.46693	0.116265	0.433114
Zscan20	11975	ENSMUSG00000061894	-0.372917	2.71663	2.46654	0.116293	0.433114
Dhps	22730	ENSMUSG00000060038	-0.276592	5.462	2.46316	0.116544	0.43361
Stap2	36338	ENSMUSG00000038781	-0.64273	0.330533	2.4599	0.116786	0.434085
Il4ra	19692	ENSMUSG00000030748	-0.450961	1.63012	2.45804	0.116924	0.434456
Fah	18887	ENSMUSG00000030630	-0.591511	0.585723	2.45051	0.117487	0.43608
Cmtm3	22929	ENSMUSG00000031875	-0.295146	6.24751	2.44652	0.117786	0.43636
Myadm	16924	ENSMUSG00000068566	-0.262592	8.03604	2.44655	0.117783	0.43636
Prkab2	9345	ENSMUSG00000038205	-0.276503	4.14875	2.44444	0.117942	0.436793
Cinp	32462	ENSMUSG00000021276	-0.265956	5.74263	2.44126	0.118181	0.437246
Sp100	826	ENSMUSG00000026222	-0.740389	5.88699	2.43933	0.118326	0.437459
Fam53c	37341	ENSMUSG00000034300	-0.305126	5.54179	2.43874	0.118371	0.437459
Noc3l	38583	ENSMUSG00000024999	-0.263767	5.66202	2.43842	0.118396	0.437459
Gm12751	10340	ENSMUSG00000062554	-0.317881	4.78373	2.43266	0.118831	0.438416
Zfp661	4451	ENSMUSG00000034800	-0.333303	3.22351	2.42857	0.119142	0.43921
Mdn1	10312	ENSMUSG00000058006	-0.255417	7.3005	2.42562	0.119366	0.43975
Sf3a2	21008	ENSMUSG00000020211	-0.300161	7.48589	2.41808	0.119942	0.440859
Ppp1r3f	5767	ENSMUSG00000039556	-0.450825	1.55106	2.41567	0.120127	0.441394
Hnrnph2	7648	ENSMUSG00000045427	-0.267117	7.32637	2.41197	0.120411	0.441646
Leprotl1	22153	ENSMUSG00000031513	-0.276463	5.98005	2.40756	0.120751	0.442097
Mex3c	37757	ENSMUSG00000037253	-0.287301	6.00575	2.40232	0.121155	0.443001
Tmub1	13058	ENSMUSG00000028958	-0.311866	3.84899	2.40048	0.121298	0.443234
Gm10031	1487	ENSMUSG00000096493	-0.482169	1.00083	2.39919	0.121398	0.443458
Tigd3	38031	ENSMUSG00000044390	-0.48496	1.15528	2.39587	0.121656	0.444109
Ppp2r3a	26528	ENSMUSG00000043154	-0.344679	3.03388	2.39213	0.121948	0.444741
Agtrap	12614	ENSMUSG00000029007	-0.299341	4.01035	2.38978	0.122131	0.445265
2700038G22Rik	13041	ENSMUSG00000097180	-0.28169	4.28937	2.38849	0.122231	0.445342
Ubxn11	12165	ENSMUSG00000012126	-0.370239	2.83552	2.38773	0.122291	0.445415
Gtdc1	2966	ENSMUSG00000036890	-0.317895	3.72632	2.38516	0.122492	0.445982
Kctd21	19042	ENSMUSG00000044952	-0.416876	1.76225	2.38111	0.122811	0.446439
Irf8	23226	ENSMUSG00000041515	-0.329549	6.46672	2.37879	0.122992	0.446524
Armcx5	7692	ENSMUSG00000072969	-0.327812	3.13629	2.37855	0.123012	0.446524
2005-03-01	38561	ENSMUSG00000023307	-0.33166	6.32302	2.37749	0.123095	0.446607
Srfbp1	37557	ENSMUSG00000024528	-0.300361	5.2672	2.37637	0.123183	0.446782
Itgam	19820	ENSMUSG00000030786	-0.252908	7.3057	2.37345	0.123414	0.447134
H2-D1	35879	ENSMUSG00000073411	-0.246835	8.75807	2.37263	0.123479	0.447134
Rabgef1	14436	ENSMUSG00000025340	-0.271542	4.98062	2.37204	0.123526	0.447158
Rin2	4747	ENSMUSG00000001768	-0.274737	6.43073	2.37021	0.123671	0.447539
Slc16a11	28302	ENSMUSG00000040938	-0.500447	0.737453	2.36897	0.123769	0.447607
Lyrm4	30482	ENSMUSG00000046573	-0.275373	5.0401	2.3681	0.123837	0.447711
Heatr6	28762	ENSMUSG00000000976	-0.271584	5.43847	2.36743	0.123891	0.447759
Pop4	18053	ENSMUSG00000030423	-0.27298	4.00588	2.36403	0.124161	0.448305
Atg12	37528	ENSMUSG00000032905	-0.270847	4.44712	2.35988	0.124492	0.449355
Spata1	9892	ENSMUSG00000028188	-0.422096	1.60568	2.35907	0.124557	0.449443
Stat3	29294	ENSMUSG00000004040	-0.3242	5.70031	2.35518	0.124868	0.450133
Bmp2k	13804	ENSMUSG00000034663	-0.264811	5.60132	2.35287	0.125053	0.450511
BC018242	25378	ENSMUSG00000040563	-0.477282	1.57085	2.34997	0.125285	0.450518
Gskip	32304	ENSMUSG00000044715	-0.295119	3.58428	2.35051	0.125242	0.450518
Zcchc7	10586	ENSMUSG00000035649	-0.26896	5.42491	2.34885	0.125375	0.450518
Ppig	3223	ENSMUSG00000042133	-0.262833	7.56665	2.35226	0.125101	0.450518
Tas1r3	12818	ENSMUSG00000029072	-0.527957	0.371705	2.34654	0.125561	0.450609
Sv2a	9276	ENSMUSG00000038486	-0.520029	0.357959	2.34782	0.125458	0.450609
Tprkb	15979	ENSMUSG00000054226	-0.270313	5.36115	2.34667	0.125551	0.450609
Anxa2	26135	ENSMUSG00000032231	-0.221148	9.54276	2.34537	0.125656	0.45066
Srsf5	31973	ENSMUSG00000021134	-0.239517	8.53757	2.34395	0.12577	0.450927
Akna	10926	ENSMUSG00000039158	-0.306765	5.64369	2.34071	0.126032	0.451578
Ascc3	20563	ENSMUSG00000038774	-0.274381	5.74552	2.33957	0.126124	0.451764
Braf	15248	ENSMUSG00000002413	-0.284988	5.21004	2.33763	0.126282	0.451896
5430435G22Rik	1214	ENSMUSG00000052688	-0.274352	5.91535	2.33557	0.126448	0.452061
Fubp1	9921	ENSMUSG00000028034	-0.243313	7.96066	2.33364	0.126606	0.452192
9930111J21Rik2	27648	ENSMUSG00000069892	-0.863145	4.00017	2.32888	0.126993	0.45283
Npc2	32041	ENSMUSG00000021242	-0.294809	7.83627	2.32848	0.127026	0.45283
Bud13	25789	ENSMUSG00000032077	-0.291049	5.1076	2.32996	0.126905	0.45283
Nol4l	4948	ENSMUSG00000061411	-0.275734	5.35533	2.32903	0.126981	0.45283
Eif3j2	37489	ENSMUSG00000043424	-0.272362	5.58743	2.32689	0.127156	0.45293
Ccdc93	1137	ENSMUSG00000026339	-0.266376	5.2861	2.31948	0.127763	0.454447
Parp12	15234	ENSMUSG00000038507	-0.567369	6.54771	2.31892	0.127809	0.454467
Masp2	12634	ENSMUSG00000028979	-0.427115	2.33788	2.31232	0.128352	0.45483
AA414768	5919	ENSMUSG00000083307	-0.287007	4.20803	2.31546	0.128093	0.45483
Fnbp4	3816	ENSMUSG00000008200	-0.28476	6.93398	2.31446	0.128176	0.45483
Fam84b	33090	ENSMUSG00000072568	-0.278037	4.45843	2.31436	0.128184	0.45483
mt-Rnr2	39144	ENSMUSG00000064339	-0.238606	7.84354	2.31375	0.128234	0.45483
Stoml1	25969	ENSMUSG00000032333	-0.457122	3.09858	2.31159	0.128413	0.454839
Ranbp10	22992	ENSMUSG00000037415	-0.266565	5.5425	2.31126	0.12844	0.454839
Il18rap	335	ENSMUSG00000026068	-0.272896	5.74792	2.30651	0.128833	0.455516
B230216N24Rik	1028	ENSMUSG00000089706	-0.45218	1.53782	2.30538	0.128927	0.45556
Srf	36218	ENSMUSG00000015605	-0.285677	6.39099	2.304	0.129042	0.455823
Creb3l4	9066	ENSMUSG00000027938	-0.503953	0.87545	2.2982	0.129524	0.45724
Sag	885	ENSMUSG00000056055	-0.319676	3.12957	2.29568	0.129734	0.457665
Mapkbp1	4289	ENSMUSG00000033902	-0.297681	4.52784	2.29443	0.129839	0.457776
Bcl6	34307	ENSMUSG00000022508	-0.271395	6.03361	2.29272	0.129982	0.457991
Tox4	24289	ENSMUSG00000016831	-0.275237	6.06975	2.29201	0.130042	0.45806
Jund	22471	ENSMUSG00000071076	-0.328758	6.06202	2.29015	0.130198	0.458465
Hnrnpc	24281	ENSMUSG00000060373	-0.223754	9.07735	2.28812	0.130368	0.458921
Gpr85	14961	ENSMUSG00000048216	-0.399053	2.15839	2.28722	0.130443	0.459043
Ebna1bp2	11712	ENSMUSG00000028729	-0.257943	7.49966	2.28661	0.130494	0.459079
Fyco1	26975	ENSMUSG00000025241	-0.310737	4.6314	2.28516	0.130617	0.45927
BC005624	2698	ENSMUSG00000026851	-0.296275	6.09748	2.285	0.13063	0.45927
B630005N14Rik	14960	ENSMUSG00000042742	-0.281951	4.91863	2.28249	0.130841	0.459724
Gm10269	37220	ENSMUSG00000091449	-0.439207	2.09144	2.28061	0.131	0.459837
1810022K09Rik	8363	ENSMUSG00000078784	-0.268656	4.84445	2.27906	0.131131	0.460024
Prr22	36373	ENSMUSG00000090273	-0.477799	1.13901	2.277	0.131306	0.460306
1810055G02Rik	37902	ENSMUSG00000035372	-0.275893	5.25138	2.27422	0.131542	0.4606
AC132444.6	39080	ENSMUSG00000096808	-0.518548	0.371823	2.27103	0.131812	0.460963
Rsad1	28952	ENSMUSG00000039096	-0.458973	1.35643	2.27074	0.131837	0.460963
Gm23455	25238	ENSMUSG00000065265	-0.362603	2.83694	2.27035	0.13187	0.460963
Ppp1r9b	28975	ENSMUSG00000038976	-0.272038	7.53379	2.27126	0.131792	0.460963
Wasl	15043	ENSMUSG00000029684	-0.262165	4.82719	2.26446	0.132373	0.462215
Fbxw7	8895	ENSMUSG00000028086	-0.270296	5.07477	2.2633	0.132472	0.462383
Taf1c	23194	ENSMUSG00000031832	-0.279425	4.2289	2.25858	0.132876	0.463444
Gm16023	12792	ENSMUSG00000086682	-0.462788	0.730232	2.25469	0.13321	0.463843
Eif3c	19712	ENSMUSG00000030738	-0.220767	8.89277	2.25419	0.133253	0.463847
Ufm1	8637	ENSMUSG00000027746	-0.256533	5.89811	2.24989	0.133624	0.464386
Gm9864	4067	ENSMUSG00000052005	-0.394874	2.75339	2.24763	0.133819	0.464631
Kti12	11497	ENSMUSG00000073775	-0.26975	5.37375	2.24778	0.133806	0.464631
Ubc	14386	ENSMUSG00000008348	-0.283692	6.8712	2.24447	0.134093	0.465188
Spag1	32914	ENSMUSG00000037617	-0.411949	1.67585	2.24332	0.134193	0.465389
Gm16344	37294	ENSMUSG00000084824	-0.461674	1.1307	2.24046	0.134441	0.46582
Parp11	16545	ENSMUSG00000037997	-0.389084	3.45824	2.23893	0.134574	0.466136
Ybx1	11752	ENSMUSG00000028639	-0.222738	10.765	2.23455	0.134956	0.4671
Max	31927	ENSMUSG00000059436	-0.295405	7.05328	2.22997	0.135357	0.46782
Rabggtb	9945	ENSMUSG00000038975	-0.263605	6.39693	2.2286	0.135476	0.46782
Gm12666	11215	ENSMUSG00000066107	-0.411758	2.18721	2.22468	0.135821	0.468315
Asun	16851	ENSMUSG00000040250	-0.273942	6.00718	2.22246	0.136016	0.468675
Cox17	34517	ENSMUSG00000046516	-0.316765	3.18785	2.21853	0.136363	0.469583
Ppap2c	20915	ENSMUSG00000052151	-0.29182	4.94616	2.21258	0.13689	0.470444
Cyth4	33335	ENSMUSG00000018008	-0.22376	9.48008	2.2133	0.136826	0.470444
D17H6S53E	35857	ENSMUSG00000043311	-0.263509	4.05911	2.20941	0.137171	0.471068
Ubr4	12335	ENSMUSG00000066036	-0.25316	7.68584	2.20841	0.13726	0.471163
Mapre2	37240	ENSMUSG00000024277	-0.303494	5.62668	2.20586	0.137487	0.471577
Gpatch1	18024	ENSMUSG00000063808	-0.291478	4.74851	2.1995	0.138056	0.472662
Zfp933	12599	ENSMUSG00000059423	-0.287076	3.86043	2.19846	0.138149	0.472837
Gm13075	12392	ENSMUSG00000086061	-0.375029	2.18139	2.19528	0.138434	0.473247
Fbxo28	1896	ENSMUSG00000047539	-0.261979	5.00838	2.19486	0.138472	0.473247
Ubap2l	9052	ENSMUSG00000042520	-0.233214	8.87	2.19477	0.13848	0.473247
Mrpl32	30033	ENSMUSG00000015672	-0.259458	5.50367	2.1913	0.138792	0.474172
Klc2	37980	ENSMUSG00000024862	-0.293399	5.22506	2.18988	0.13892	0.474464
Wdr46	35737	ENSMUSG00000024312	-0.283348	6.61354	2.18825	0.139068	0.474561
Peak1	25914	ENSMUSG00000074305	-0.257634	7.11777	2.1877	0.139117	0.474561
Slc6a13	16387	ENSMUSG00000030108	-0.298311	5.10945	2.18518	0.139345	0.475048
Bbs9	25404	ENSMUSG00000035919	-0.335488	3.91733	2.18211	0.139623	0.475563
Tap1	35763	ENSMUSG00000037321	-0.716081	5.24834	2.17845	0.139955	0.475975
Eif2s2	4993	ENSMUSG00000074656	-0.226776	8.15427	2.17973	0.139839	0.475975
Morf4l2	7735	ENSMUSG00000031422	-0.216695	8.49553	2.17889	0.139915	0.475975
Adat2	20234	ENSMUSG00000019808	-0.312862	3.0535	2.17574	0.140202	0.476492
Baz1a	31718	ENSMUSG00000035021	-0.242978	7.28685	2.17538	0.140235	0.476492
Gm21994	4819	ENSMUSG00000074735	-0.403206	1.75587	2.16842	0.140871	0.477475
Nup210l	9060	ENSMUSG00000027939	-0.362321	2.40208	2.16798	0.140911	0.477475
Ppargc1b	37646	ENSMUSG00000033871	-0.300894	3.33625	2.16723	0.14098	0.477475
Magohb	16658	ENSMUSG00000030188	-0.271826	3.79879	2.16598	0.141095	0.477475
Tmem87a	4302	ENSMUSG00000033808	-0.257075	5.80207	2.16424	0.141254	0.477503
Hypk	4343	ENSMUSG00000027245	-0.386826	1.94886	2.16024	0.141623	0.478318
Isca2	32042	ENSMUSG00000021241	-0.31097	4.65177	2.15793	0.141836	0.478698
Rps6kb1	28820	ENSMUSG00000020516	-0.261862	6.55549	2.15722	0.141901	0.478698
Wfs1	13299	ENSMUSG00000039474	-0.377518	2.24799	2.15292	0.142299	0.479448
Wdr43	36489	ENSMUSG00000041057	-0.226283	8.16998	2.15087	0.142489	0.479945
Zfp27	17851	ENSMUSG00000062040	-0.274097	3.63359	2.14835	0.142723	0.480445
Gm10420	16412	ENSMUSG00000072789	-0.457102	0.686881	2.14609	0.142933	0.480865
Ino80	4269	ENSMUSG00000034154	-0.261889	5.82669	2.14465	0.143068	0.481175
Srcap	19787	ENSMUSG00000053877	-0.264816	4.15394	2.14217	0.143299	0.48152
Parvb	33518	ENSMUSG00000022438	-0.252965	7.20845	2.1365	0.14383	0.482667
Rab10os	31373	ENSMUSG00000079179	-0.264928	4.41828	2.13382	0.144082	0.482974
Rrp7a	33494	ENSMUSG00000018040	-0.25995	7.02023	2.12983	0.144457	0.483819
Tlcd2	28513	ENSMUSG00000038217	-0.461805	1.11832	2.1285	0.144582	0.484002
Tnfsf13b	21787	ENSMUSG00000031497	-0.409485	2.01976	2.12833	0.144598	0.484002
Ppapdc1b	22080	ENSMUSG00000031570	-0.262112	5.16275	2.12636	0.144784	0.484048
Dnajc18	37363	ENSMUSG00000024350	-0.259637	4.25018	2.12726	0.1447	0.484048
Mfhas1	22167	ENSMUSG00000070056	-0.260066	4.22283	2.12313	0.145089	0.484781
Rps6-ps4	3346	ENSMUSG00000081406	-0.296148	6.02924	2.12064	0.145326	0.485284
6820431F20Rik	21926	ENSMUSG00000071796	-0.262801	5.25818	2.12074	0.145316	0.485284
Otud5	5788	ENSMUSG00000031154	-0.28426	6.5405	2.11886	0.145495	0.48556
Gm11772	29849	ENSMUSG00000085501	-0.608386	1.70908	2.11593	0.145774	0.485621
Usp16	34844	ENSMUSG00000025616	-0.25277	5.97893	2.11548	0.145816	0.485621
Twf1	33644	ENSMUSG00000022451	-0.248227	6.06867	2.11647	0.145722	0.485621
Psma6	31730	ENSMUSG00000021024	-0.232727	7.74192	2.11517	0.145846	0.485621
Gm11696	29573	ENSMUSG00000056687	-0.466044	0.777618	2.109	0.146435	0.486819
Zfp516	37855	ENSMUSG00000058881	-0.297931	3.45054	2.10764	0.146565	0.486962
Kin	2122	ENSMUSG00000037262	-0.263353	4.52132	2.10537	0.146783	0.487464
Eif4g3	12290	ENSMUSG00000028760	-0.228554	8.02643	2.1038	0.146933	0.487464
Ttc17	3917	ENSMUSG00000027194	-0.27035	5.81984	2.09994	0.147305	0.487832
Srpr	25486	ENSMUSG00000032042	-0.244574	7.45273	2.1006	0.147242	0.487832
Chmp2a	17241	ENSMUSG00000033916	-0.289601	7.07433	2.09914	0.147382	0.487945
Casc4	4353	ENSMUSG00000060227	-0.297168	3.24563	2.09719	0.14757	0.488425
Rnf11	11511	ENSMUSG00000028557	-0.250561	5.68237	2.09597	0.147688	0.48867
Gm16702	35090	ENSMUSG00000097796	-0.36322	2.31521	2.08486	0.148766	0.491081
Uba1	6003	ENSMUSG00000001924	-0.2085	9.27322	2.08575	0.148679	0.491081
Gm13680	3438	ENSMUSG00000081400	-0.493478	1.60318	2.08388	0.148861	0.491107
Slc7a6os	23017	ENSMUSG00000033106	-0.250787	5.50062	2.08392	0.148857	0.491107
Aatf	28774	ENSMUSG00000018697	-0.266251	6.39165	2.0788	0.149358	0.491591
Asb7	18705	ENSMUSG00000030509	-0.25833	4.00693	2.07917	0.149321	0.491591
Leng8	16962	ENSMUSG00000035545	-0.246	7.21107	2.08087	0.149155	0.491591
Sugp1	22435	ENSMUSG00000011306	-0.27315	5.49813	2.07817	0.149419	0.491649
Hars	37391	ENSMUSG00000001380	-0.237332	7.4973	2.07698	0.149536	0.49189
Rpl10-ps3	25819	ENSMUSG00000058443	-0.279497	5.07914	2.07599	0.149633	0.49195
Lrig2	9463	ENSMUSG00000032913	-0.280674	3.87804	2.07049	0.150173	0.493407
Smn1	31184	ENSMUSG00000021645	-0.269055	6.20832	2.06853	0.150367	0.493755
Gm12606	11187	ENSMUSG00000087659	-0.270353	3.88668	2.06637	0.150579	0.494173
Rpl35	2933	ENSMUSG00000062997	-0.255221	9.78683	2.06635	0.150582	0.494173
Ogfod1	22839	ENSMUSG00000033009	-0.257635	5.293	2.06504	0.150711	0.494209
Gm4419	31517	ENSMUSG00000097055	-0.368984	2.11376	2.06285	0.150928	0.494585
Whamm	18848	ENSMUSG00000045795	-0.370912	4.29813	2.06044	0.151166	0.495079
Tmc4	16940	ENSMUSG00000019734	-0.502517	0.67585	2.05989	0.151221	0.495114
Eif1a	37526	ENSMUSG00000057561	-0.235887	7.44417	2.05761	0.151448	0.495712
8030462N17Rik	37806	ENSMUSG00000047466	-0.270073	4.01843	2.05515	0.151693	0.49608
Eif5b	302	ENSMUSG00000026083	-0.242042	8.27662	2.05547	0.15166	0.49608
Zc3h7a	34026	ENSMUSG00000037965	-0.267058	6.36932	2.05275	0.151931	0.496509
Ptpn2	37726	ENSMUSG00000024539	-0.255792	5.81755	2.0525	0.151957	0.496509
1110038F14Rik	33287	ENSMUSG00000063236	-0.267043	4.84344	2.0514	0.152066	0.496562
Cd63	21621	ENSMUSG00000025351	-0.232954	7.69829	2.05012	0.152194	0.496562
Rdh11	31949	ENSMUSG00000066441	-0.259695	4.99701	2.04901	0.152305	0.496636
Zfp458	30883	ENSMUSG00000055480	-0.430674	0.894702	2.04716	0.152491	0.49675
Gosr1	28550	ENSMUSG00000010392	-0.2543	5.77448	2.04725	0.152482	0.49675
Cstb	20889	ENSMUSG00000005054	-0.246232	7.22377	2.0462	0.152586	0.496833
Blzf1	1593	ENSMUSG00000026577	-0.248673	5.52459	2.0432	0.152888	0.497384
Serinc1	20607	ENSMUSG00000019877	-0.231079	7.40711	2.04328	0.15288	0.497384
Usp11	6005	ENSMUSG00000031066	-0.407542	1.4822	2.04247	0.152961	0.497479
1700047I17Rik2	31726	ENSMUSG00000094103	-0.504261	1.34657	2.03549	0.153664	0.498035
Gm14586	6414	ENSMUSG00000083621	-0.441271	2.37857	2.03589	0.153624	0.498035
Dhrs3	12500	ENSMUSG00000066026	-0.399981	3.76234	2.03731	0.153481	0.498035
Gm12366	10364	ENSMUSG00000082762	-0.369542	4.5389	2.03664	0.153549	0.498035
Tmsb10	15854	ENSMUSG00000079523	-0.2855	5.96073	2.0358	0.153634	0.498035
Rbm3	5812	ENSMUSG00000031167	-0.208972	9.13425	2.03736	0.153476	0.498035
Alcam	34648	ENSMUSG00000022636	-0.215232	8.16172	2.03438	0.153777	0.498257
Opa3	17448	ENSMUSG00000052214	-0.248038	6.03754	2.03309	0.153907	0.498535
Clk3	25953	ENSMUSG00000032316	-0.272718	5.16689	2.02725	0.1545	0.499735
Alkbh8	25140	ENSMUSG00000025899	-0.262666	4.17166	2.02566	0.154662	0.500115
Gm16892	34681	ENSMUSG00000097876	-0.459304	0.429331	2.02235	0.154999	0.50059
Tut1	38171	ENSMUSG00000071645	-0.255749	5.6978	2.0216	0.155076	0.50059
Hhex	38566	ENSMUSG00000024986	-0.265522	6.19274	2.0188	0.155362	0.50117
Tes	14974	ENSMUSG00000029552	-0.249626	6.70851	2.01809	0.155435	0.50117
I830077J02Rik	9484	ENSMUSG00000074342	-0.496724	1.27291	2.0164	0.155607	0.501278
null	17791	ENSMUSG00000037513	-0.263217	6.2825	2.01334	0.155921	0.50159
Npm1	27469	ENSMUSG00000057113	-0.175885	11.6516	2.0117	0.156091	0.501848
Ciart	9264	ENSMUSG00000038550	-0.416965	1.98663	2.00534	0.156746	0.503235
Cdc37	25344	ENSMUSG00000019471	-0.248577	8.71101	2.00359	0.156927	0.503328
Lats1	20180	ENSMUSG00000040021	-0.251862	6.22235	2.00204	0.157088	0.503418
Snora78	35415	ENSMUSG00000089255	-0.464476	0.330029	1.99962	0.157339	0.503843
Neurl4	28282	ENSMUSG00000047284	-0.24392	6.15208	1.99988	0.157312	0.503843
Gca	3149	ENSMUSG00000026893	-0.386665	2.20794	1.99689	0.157622	0.504175
Sec24a	27749	ENSMUSG00000036391	-0.244654	5.40537	1.99716	0.157594	0.504175
Pdcd11	38759	ENSMUSG00000025047	-0.236775	6.96997	1.99415	0.157908	0.504945
Zfp46	12244	ENSMUSG00000051351	-0.272437	3.66151	1.98908	0.158437	0.506174
Mbd6	21521	ENSMUSG00000025409	-0.302584	6.35299	1.98699	0.158656	0.506617
Ciapin1	22864	ENSMUSG00000031781	-0.245751	6.16071	1.9863	0.158728	0.506686
Apc	37324	ENSMUSG00000005871	-0.24237	5.60927	1.98378	0.158992	0.50726
Ddx55	14374	ENSMUSG00000029389	-0.254618	4.99639	1.98212	0.159167	0.507321
Cib1	18808	ENSMUSG00000030538	-0.249866	5.47307	1.98313	0.159062	0.507321
Zfp263	33914	ENSMUSG00000022529	-0.245408	5.47466	1.982	0.15918	0.507321
Fads2	38189	ENSMUSG00000024665	-0.243648	7.73409	1.96878	0.160577	0.510577
Rps24	23756	ENSMUSG00000025290	-0.209798	10.4936	1.96637	0.160833	0.511246
4632427E13Rik	19014	ENSMUSG00000074024	-0.476749	1.28917	1.9603	0.161481	0.512579
D17Wsu92e	35554	ENSMUSG00000056692	-0.25122	6.96012	1.95979	0.161536	0.51261
Myl12a	36478	ENSMUSG00000024048	-0.221819	8.15052	1.95538	0.162009	0.513675
Galnt3	3174	ENSMUSG00000026994	-0.285129	3.31519	1.95145	0.162431	0.513699
Rasa4	14521	ENSMUSG00000004952	-0.271692	6.63905	1.95441	0.162112	0.513699
Rrp15	1938	ENSMUSG00000001305	-0.250797	6.3702	1.95363	0.162196	0.513699
Psma4	25896	ENSMUSG00000032301	-0.236358	7.90014	1.95171	0.162403	0.513699
Psmc1	32182	ENSMUSG00000021178	-0.220829	8.06722	1.94782	0.162822	0.514512
Cds1	13864	ENSMUSG00000029330	-0.466143	0.482805	1.94442	0.16319	0.51483
Celsr3	26715	ENSMUSG00000023473	-0.452285	0.340727	1.94308	0.163335	0.51483
Unkl	35440	ENSMUSG00000015127	-0.31389	3.04023	1.94338	0.163302	0.51483
Kmt2b	17899	ENSMUSG00000006307	-0.242185	6.58427	1.94541	0.163082	0.51483
Arhgef7	21806	ENSMUSG00000031511	-0.24044	7.41424	1.94381	0.163256	0.51483
Lrsam1	2777	ENSMUSG00000026792	-0.273024	3.6504	1.94034	0.163631	0.515331
Ap3s1	37529	ENSMUSG00000024480	-0.242419	5.32518	1.94037	0.163628	0.515331
Ankrd37	22249	ENSMUSG00000050914	-0.403058	1.65958	1.93964	0.163707	0.515426
Phactr4	12097	ENSMUSG00000066043	-0.241761	5.67234	1.93711	0.163983	0.516004
Nedd4	26199	ENSMUSG00000032216	-0.408269	1.40329	1.93596	0.164108	0.516155
Alg11	22018	ENSMUSG00000063362	-0.248085	4.81924	1.93583	0.164123	0.516155
Tm2d1	11293	ENSMUSG00000028563	-0.247471	4.46278	1.93097	0.164652	0.517228
null	39134	ENSMUSG00000063897	-0.312938	6.11529	1.92895	0.164873	0.517502
Chd4	16501	ENSMUSG00000063870	-0.207201	8.59629	1.92574	0.165225	0.518211
Eif5	32477	ENSMUSG00000021282	-0.204735	8.70817	1.92197	0.16564	0.518893
Usp40	887	ENSMUSG00000005501	-0.250612	5.12026	1.92134	0.16571	0.518968
mt-Tp	39177	ENSMUSG00000064372	-0.244517	4.27725	1.91988	0.16587	0.519326
Tpst1	14434	ENSMUSG00000034118	-0.332846	6.01896	1.91678	0.166212	0.519972
Mettl16	28485	ENSMUSG00000010554	-0.248623	6.28966	1.91696	0.166192	0.519972
Soat2	33840	ENSMUSG00000023045	-0.363799	2.32491	1.91539	0.166366	0.520155
Efcab2	1842	ENSMUSG00000026495	-0.441901	0.491686	1.91495	0.166414	0.52016
Mir5125	35355	ENSMUSG00000092981	-0.383671	2.33103	1.91358	0.166566	0.520262
Lcp1	24875	ENSMUSG00000021998	-0.179325	10.9077	1.91422	0.166495	0.520262
Zfp575	17644	ENSMUSG00000066721	-0.540648	0.778128	1.91227	0.166712	0.520511
Cd207	15928	ENSMUSG00000034783	-0.732994	1.65775	1.90487	0.167535	0.521776
1810024B03Rik	4436	ENSMUSG00000044145	-0.466924	0.265156	1.90151	0.167909	0.522304
Klhl20	1539	ENSMUSG00000026705	-0.247252	5.2042	1.90054	0.168017	0.522304
Cycs	15459	ENSMUSG00000063694	-0.228857	7.99418	1.89924	0.168163	0.52243
Tmem198	733	ENSMUSG00000051703	-0.423506	1.13746	1.89801	0.168301	0.522571
Pmm2	33987	ENSMUSG00000022711	-0.255056	6.28683	1.89528	0.168607	0.523376
Fam212a	26667	ENSMUSG00000042106	-0.575046	1.88635	1.89281	0.168885	0.524094
H3f3a-ps2	34917	ENSMUSG00000081176	-0.452623	0.222623	1.89137	0.169048	0.524453
Rpl18a	22487	ENSMUSG00000045128	-0.229748	10.2262	1.88918	0.169295	0.524594
Eif4g2	19527	ENSMUSG00000005610	-0.183748	10.3939	1.8889	0.169326	0.524594
Dtx2	14518	ENSMUSG00000004947	-0.273677	4.37451	1.88802	0.169426	0.524757
Hax1	9051	ENSMUSG00000027944	-0.230021	8.09567	1.88404	0.169876	0.525429
Gm21992	37955	ENSMUSG00000096370	-0.424993	0.833052	1.88057	0.170269	0.5265
Ccdc84	25728	ENSMUSG00000043923	-0.273776	3.47971	1.87923	0.170422	0.526789
Adrm1	5592	ENSMUSG00000039041	-0.249537	7.4289	1.87709	0.170666	0.52729
Dffa	12644	ENSMUSG00000028974	-0.243056	4.45175	1.87502	0.170901	0.527706
Dhx8	29351	ENSMUSG00000034931	-0.240378	6.48738	1.87411	0.171005	0.527759
Eepd1	25423	ENSMUSG00000036611	-0.252182	5.04869	1.87205	0.17124	0.528339
Prmt2	20821	ENSMUSG00000020230	-0.276342	3.36099	1.86817	0.171685	0.529452
Gsdmd	33218	ENSMUSG00000022575	-0.274624	6.46326	1.86563	0.171977	0.530175
Gm26792	38738	ENSMUSG00000096996	-0.374341	2.04822	1.86448	0.172109	0.530316
Zfp407	37860	ENSMUSG00000048410	-0.246696	4.44746	1.86079	0.172534	0.531456
Qtrt1	25356	ENSMUSG00000002825	-0.255054	5.18947	1.8542	0.173295	0.533217
Ddx6	25736	ENSMUSG00000032097	-0.223712	7.54381	1.85151	0.173608	0.533303
Rbm5	26656	ENSMUSG00000032580	-0.245363	6.704	1.84899	0.173901	0.533765
S100a1	9079	ENSMUSG00000044080	-0.288313	5.32326	1.84664	0.174175	0.534313
Slc17a6	18384	ENSMUSG00000030500	-0.480721	0.555671	1.84324	0.174572	0.534521
Setdb2	24648	ENSMUSG00000071350	-0.426882	4.2885	1.84427	0.174452	0.534521
Zfp691	11743	ENSMUSG00000045268	-0.317155	3.30728	1.8438	0.174506	0.534521
Per1	28217	ENSMUSG00000020893	-0.238764	4.5832	1.84313	0.174584	0.534521
Gm22478	18276	ENSMUSG00000084519	-0.465029	0.190727	1.84183	0.174737	0.534578
Pacsin1	35551	ENSMUSG00000040276	-0.748834	-0.0991835	1.8405	0.174892	0.534627
Rpl15-ps3	25393	ENSMUSG00000061167	-0.437798	2.24696	1.84087	0.17485	0.534627
Ubxn4	1169	ENSMUSG00000026353	-0.23455	7.02504	1.84047	0.174895	0.534627
Chml	1811	ENSMUSG00000078185	-0.42273	1.59228	1.84001	0.17495	0.534647
Gorasp2	3245	ENSMUSG00000014959	-0.238051	7.4956	1.83959	0.174999	0.534653
1600020E01Rik	15994	ENSMUSG00000097048	-0.290828	3.22616	1.83677	0.17533	0.535082
Wrnip1	30421	ENSMUSG00000021400	-0.240331	5.00534	1.83423	0.175629	0.535736
Gm9800	23628	ENSMUSG00000045799	-0.246918	4.01767	1.83318	0.175752	0.535804
Nek6	2915	ENSMUSG00000026749	-0.240155	5.90854	1.83274	0.175805	0.535804
Adam17	31514	ENSMUSG00000052593	-0.218177	7.73985	1.83304	0.175769	0.535804
Mamdc4	2499	ENSMUSG00000026941	-0.404691	1.39486	1.82959	0.176176	0.536733
Rnf25	692	ENSMUSG00000026171	-0.242226	4.86478	1.82935	0.176205	0.536733
Zswim1	5263	ENSMUSG00000017764	-0.271908	4.06419	1.82585	0.176619	0.537701
Nmi	3031	ENSMUSG00000026946	-0.44156	4.4198	1.82165	0.177117	0.538725
Rpl17-ps10	18738	ENSMUSG00000081895	-0.409209	1.16807	1.82159	0.177124	0.538725
Zcrb1	33638	ENSMUSG00000022635	-0.256846	6.3063	1.82081	0.177216	0.538725
D11Wsu47e	29619	ENSMUSG00000041623	-0.246121	4.18084	1.81933	0.177393	0.538746
Trit1	11830	ENSMUSG00000028653	-0.237824	4.2025	1.81785	0.177569	0.538989
Ccdc174	16111	ENSMUSG00000034083	-0.259731	4.51476	1.81705	0.177664	0.539132
Ranbp2	20621	ENSMUSG00000003226	-0.220378	7.61616	1.81607	0.177782	0.539344
Kat6a	22041	ENSMUSG00000031540	-0.232742	6.1275	1.81288	0.178163	0.540061
Asns	14925	ENSMUSG00000029752	-0.219159	7.61217	1.81091	0.178399	0.540487
Dpp7	2482	ENSMUSG00000026958	-0.244092	5.08667	1.81012	0.178494	0.540629
Bud31	14752	ENSMUSG00000038722	-0.242249	6.45729	1.80796	0.178754	0.541123
C030039L03Rik	17760	ENSMUSG00000057093	-0.438738	0.58633	1.80181	0.179494	0.542541
Plbd2	14241	ENSMUSG00000029598	-0.253455	6.42747	1.80021	0.179687	0.542632
Slc30a7	9611	ENSMUSG00000054414	-0.242508	6.35346	1.79325	0.180531	0.545035
Gm12174	27617	ENSMUSG00000080776	-0.477671	0.991846	1.79003	0.180923	0.545721
Mir6363	34641	ENSMUSG00000098482	-0.46295	0.739472	1.78979	0.180952	0.545721
Fscn1	14697	ENSMUSG00000029581	-0.438681	1.67629	1.78768	0.181209	0.546005
Ptrh1	2770	ENSMUSG00000053746	-0.338553	2.53798	1.78742	0.18124	0.546005
Mier2	20917	ENSMUSG00000042570	-0.236348	4.7692	1.78681	0.181315	0.546083
Wipf2	29161	ENSMUSG00000038013	-0.235659	5.35299	1.78389	0.181673	0.546837
Arf4	23797	ENSMUSG00000021877	-0.231045	6.92397	1.78357	0.181711	0.546837
Tgif1	36471	ENSMUSG00000047407	-0.233314	6.52542	1.78251	0.181841	0.546935
Atg4a	7817	ENSMUSG00000079418	-0.231894	4.12077	1.78171	0.18194	0.547084
Rnf215	27041	ENSMUSG00000003581	-0.26771	3.55147	1.77783	0.182416	0.547492
Hsp90aa1	32455	ENSMUSG00000021270	-0.188258	9.65679	1.77784	0.182415	0.547492
Nat14	17006	ENSMUSG00000035285	-0.461218	0.7655	1.77338	0.182964	0.548364
Ndufa12	21240	ENSMUSG00000020022	-0.282964	6.40028	1.76994	0.183389	0.549239
Ipo4	24551	ENSMUSG00000002319	-0.239031	7.07504	1.76996	0.183387	0.549239
Gm26672	37427	ENSMUSG00000097330	-0.437182	0.572414	1.76736	0.183709	0.549936
Zfp292	10354	ENSMUSG00000039967	-0.242749	4.72714	1.76684	0.183773	0.549949
H60b	20308	ENSMUSG00000075297	-0.329272	2.67702	1.76555	0.183933	0.550012
Dmtf1	12917	ENSMUSG00000042508	-0.231329	5.3762	1.76336	0.184206	0.550012
Zc3h15	3444	ENSMUSG00000027091	-0.221288	7.38057	1.76313	0.184235	0.550012
mt-Co3	39163	ENSMUSG00000064358	-0.156768	12.5287	1.76379	0.184153	0.550012
Gm15542	19986	ENSMUSG00000083396	-0.343682	2.38856	1.75839	0.184826	0.550732
Mif4gd	29682	ENSMUSG00000020743	-0.252279	4.626	1.75782	0.184897	0.550732
Acy1	26600	ENSMUSG00000023262	-0.247511	5.13845	1.75906	0.184742	0.550732
Srebf2	33453	ENSMUSG00000022463	-0.225568	7.34953	1.75939	0.1847	0.550732
Eif3h	33014	ENSMUSG00000022312	-0.212678	8.27569	1.75982	0.184646	0.550732
Rnf6	14770	ENSMUSG00000029634	-0.223361	5.91254	1.75485	0.185268	0.551633
Cct6a	14422	ENSMUSG00000029447	-0.195599	8.8045	1.75332	0.185461	0.551913
Gm14418	5549	ENSMUSG00000078867	-0.457519	1.03215	1.74988	0.185891	0.552343
Hspa5	2810	ENSMUSG00000026864	-0.181924	10.3213	1.74982	0.1859	0.552343
Sepsecs	13397	ENSMUSG00000029173	-0.252738	4.01624	1.74637	0.186334	0.552995
Gdpd5	19082	ENSMUSG00000035314	-0.245529	4.86256	1.74638	0.186332	0.552995
Trib1	33084	ENSMUSG00000032501	-0.229951	5.27638	1.74474	0.18654	0.553043
Ly6g5b	35853	ENSMUSG00000043807	-0.430716	0.320836	1.74273	0.186794	0.553244
Zc3h10	21600	ENSMUSG00000039810	-0.271485	4.36311	1.74323	0.18673	0.553244
Wdr47	9568	ENSMUSG00000040389	-0.245614	4.2184	1.74278	0.186786	0.553244
Ptbp1	20938	ENSMUSG00000006498	-0.200507	9.08171	1.73773	0.187427	0.554974
Polr3d	24835	ENSMUSG00000000776	-0.239695	6.07831	1.73676	0.18755	0.555047
Trak2	487	ENSMUSG00000026028	-0.230624	6.18832	1.73676	0.18755	0.555047
Rab3gap1	1164	ENSMUSG00000036104	-0.225556	5.60702	1.73134	0.18824	0.556665
Clasp1	1103	ENSMUSG00000064302	-0.222147	6.05452	1.73087	0.1883	0.556665
Csnk2b	35854	ENSMUSG00000024387	-0.240197	7.36035	1.72667	0.188837	0.55768
Cct3	8963	ENSMUSG00000001416	-0.19216	9.65694	1.72671	0.188832	0.55768
Kctd17	33328	ENSMUSG00000033287	-0.24663	4.53697	1.72596	0.188928	0.557693
Hoxb4	29034	ENSMUSG00000038692	-0.343693	2.80494	1.72405	0.189173	0.557793
Ofd1	8238	ENSMUSG00000040586	-0.238275	4.49562	1.72407	0.18917	0.557793
Fem1a	36353	ENSMUSG00000043683	-0.227228	6.42226	1.72327	0.189272	0.557851
Zfp455	30882	ENSMUSG00000051037	-0.408146	0.595016	1.72191	0.189447	0.558161
Suco	1548	ENSMUSG00000040297	-0.233116	4.94127	1.72058	0.189619	0.55852
Ube2l6	3478	ENSMUSG00000027078	-0.473217	5.41984	1.71958	0.189747	0.558593
Rbm17	2260	ENSMUSG00000037197	-0.236896	7.48282	1.71923	0.189792	0.558593
Mast1	22714	ENSMUSG00000053693	-0.406651	1.21547	1.71619	0.190184	0.559211
Trim39	35977	ENSMUSG00000045409	-0.235788	5.19435	1.71597	0.190212	0.559211
Pmaip1	37708	ENSMUSG00000024521	-0.23213	4.69395	1.71631	0.190169	0.559211
Exosc3	10601	ENSMUSG00000028322	-0.236141	5.5558	1.71461	0.190388	0.559466
Serpinb1c	30425	ENSMUSG00000079049	-0.441953	0.718194	1.712	0.190726	0.559584
Gm26905	22327	ENSMUSG00000097695	-0.236026	5.76427	1.71228	0.19069	0.559584
Utp11l	11876	ENSMUSG00000028907	-0.232428	6.9301	1.71057	0.190911	0.55998
Eml5	32170	ENSMUSG00000051166	-0.341055	2.33424	1.70803	0.191241	0.56026
Ppif	23766	ENSMUSG00000021868	-0.228018	5.96885	1.70791	0.191256	0.56026
Cfdp1	23127	ENSMUSG00000031954	-0.239335	6.95135	1.70638	0.191456	0.560622
Nop58	502	ENSMUSG00000026020	-0.194531	8.67676	1.7033	0.191857	0.561289
Tceb3	12234	ENSMUSG00000028668	-0.234117	6.52867	1.70026	0.192254	0.562011
Zfp560	25306	ENSMUSG00000045519	-0.341416	2.30636	1.69646	0.192752	0.562734
Abhd14a	26601	ENSMUSG00000042210	-0.314484	2.5704	1.69322	0.193177	0.562809
Sav1	31846	ENSMUSG00000021067	-0.232941	5.65731	1.69291	0.193217	0.562809
Wdr59	23119	ENSMUSG00000031959	-0.232078	3.98957	1.69443	0.193018	0.562809
Sel1l	32149	ENSMUSG00000020964	-0.220271	7.15959	1.69319	0.193182	0.562809
6230400D17Rik	23721	ENSMUSG00000097577	-0.405604	1.18409	1.69004	0.193595	0.563587
Dnase1	33931	ENSMUSG00000005980	-0.395126	2.02298	1.68799	0.193866	0.564228
Arap1	19135	ENSMUSG00000032812	-0.277237	6.60101	1.68613	0.194112	0.564652
Rap2b	8713	ENSMUSG00000036894	-0.227067	5.82179	1.68643	0.194072	0.564652
Gm26642	1300	ENSMUSG00000097680	-0.367372	2.02107	1.68399	0.194395	0.565066
Plxna1	16054	ENSMUSG00000030084	-0.231819	4.71297	1.67779	0.195219	0.566115
Picalm	18994	ENSMUSG00000039361	-0.197262	8.21651	1.67856	0.195116	0.566115
Eif3g	25327	ENSMUSG00000070319	-0.213259	7.9469	1.67513	0.195573	0.566994
Scd1	38689	ENSMUSG00000037071	-0.248928	4.67485	1.67088	0.196141	0.568055
Fem1b	26022	ENSMUSG00000032244	-0.233108	6.01546	1.67088	0.196141	0.568055
Med29	17789	ENSMUSG00000003444	-0.267196	4.78372	1.66942	0.196336	0.568329
Anapc15	19148	ENSMUSG00000030649	-0.23913	4.3025	1.6675	0.196594	0.56862
Uvssa	13227	ENSMUSG00000037355	-0.238056	4.04202	1.66716	0.196639	0.56862
Sec11c	37698	ENSMUSG00000024516	-0.208266	7.39482	1.66736	0.196612	0.56862
Prickle3	5774	ENSMUSG00000031145	-0.273675	3.19863	1.66599	0.196797	0.568784
Med14	5915	ENSMUSG00000064127	-0.224143	6.12056	1.66602	0.196792	0.568784
5430427O19Rik	6980	ENSMUSG00000025058	-0.284345	5.00737	1.6652	0.196903	0.568909
Wac	37123	ENSMUSG00000024283	-0.232114	6.83899	1.66491	0.196942	0.568909
2010015M23Rik	28875	ENSMUSG00000096983	-0.442378	0.30443	1.6622	0.197306	0.568958
Zfp597	33917	ENSMUSG00000039789	-0.345861	2.67189	1.66382	0.197088	0.568958
Slc27a3	9072	ENSMUSG00000027932	-0.341153	2.45604	1.66342	0.197142	0.568958
Vamp2	28216	ENSMUSG00000020894	-0.226026	5.48601	1.66103	0.197465	0.568958
Safb2	36362	ENSMUSG00000042625	-0.224453	7.42445	1.66281	0.197225	0.568958
Ifnar1	34927	ENSMUSG00000022967	-0.222778	6.17889	1.66224	0.197301	0.568958
Bsg	20928	ENSMUSG00000023175	-0.209209	8.4701	1.65916	0.197716	0.56939
Lims2	37291	ENSMUSG00000024395	-0.44498	1.3333	1.6557	0.198185	0.570302
Orai1	14316	ENSMUSG00000049686	-0.260505	4.54515	1.65119	0.198797	0.571219
Abcf1	35932	ENSMUSG00000038762	-0.22335	7.98832	1.6511	0.198809	0.571219
Tagap	35078	ENSMUSG00000033450	-0.289315	2.93989	1.64605	0.199498	0.572305
Selplg	14093	ENSMUSG00000048163	-0.246974	4.3262	1.64497	0.199645	0.572305
Slc19a1	20840	ENSMUSG00000001436	-0.225044	7.0002	1.64501	0.19964	0.572305
Atg16l1	881	ENSMUSG00000026289	-0.219513	5.4905	1.64578	0.199534	0.572305
Rltpr	22986	ENSMUSG00000050357	-0.412431	0.582757	1.64316	0.199893	0.572508
Aup1	15898	ENSMUSG00000068328	-0.216554	7.78581	1.64143	0.200129	0.572508
Ftsj3	29500	ENSMUSG00000020706	-0.200996	8.11029	1.64305	0.199907	0.572508
Ttll3	16248	ENSMUSG00000030276	-0.263857	3.23844	1.63854	0.200526	0.57307
Malat1	38020	ENSMUSG00000092341	-0.199535	8.30188	1.63675	0.200772	0.573198
Arhgdib	16755	ENSMUSG00000030220	-0.19915	9.39802	1.63681	0.200764	0.573198
Nub1	13070	ENSMUSG00000028954	-0.296162	5.4455	1.6352	0.200986	0.573225
Pea15a	1741	ENSMUSG00000013698	-0.233621	5.02501	1.6359	0.200889	0.573225
Cwc27	31230	ENSMUSG00000021715	-0.232746	4.93431	1.63546	0.20095	0.573225
Rrbp1	4711	ENSMUSG00000027422	-0.238932	8.37471	1.63264	0.201339	0.574086
Nsa2	31143	ENSMUSG00000060739	-0.204733	8.1649	1.63221	0.201398	0.574109
Pqbp1	5791	ENSMUSG00000031157	-0.253347	5.87299	1.62246	0.202748	0.576506
Usp32	28788	ENSMUSG00000000804	-0.222355	4.27342	1.62244	0.202752	0.576506
Cxcr2	672	ENSMUSG00000026180	-0.43264	0.0205263	1.61515	0.203769	0.578521
Klhl12	1280	ENSMUSG00000026455	-0.264062	3.47256	1.61167	0.204257	0.57932
Rpl19	29116	ENSMUSG00000017404	-0.185243	9.992	1.60682	0.20494	0.580525
AI480526	14322	ENSMUSG00000090086	-0.227598	4.19968	1.60541	0.205138	0.580795
Nip7	23040	ENSMUSG00000031917	-0.222518	6.56867	1.60557	0.205116	0.580795
Arhgap25	16011	ENSMUSG00000030047	-0.444737	3.56504	1.60389	0.205353	0.580912
Ptgs2os2	1413	ENSMUSG00000097754	-0.300682	3.08205	1.60407	0.205328	0.580912
Dph5	9610	ENSMUSG00000033554	-0.22423	5.64037	1.60329	0.205438	0.580912
Lclat1	36503	ENSMUSG00000054469	-0.22284	4.51021	1.59881	0.206072	0.581534
Srrm2	35354	ENSMUSG00000039218	-0.180821	9.34961	1.59945	0.205981	0.581534
Zfp428	17640	ENSMUSG00000064264	-0.391631	2.4856	1.59626	0.206434	0.58241
Abi2	515	ENSMUSG00000026782	-0.234567	5.2489	1.59554	0.206536	0.582552
Tmem161a	22445	ENSMUSG00000002342	-0.229152	5.16662	1.59501	0.206612	0.58262
Fbxw9	22727	ENSMUSG00000008167	-0.256516	3.29922	1.59402	0.206752	0.582868
Ccdc124	22485	ENSMUSG00000007721	-0.258075	5.85281	1.59299	0.2069	0.582992
Ift22	14537	ENSMUSG00000007987	-0.23558	4.35855	1.59135	0.207134	0.583066
Lrrc59	28956	ENSMUSG00000020869	-0.193603	8.50945	1.59087	0.207202	0.583112
Zfp420	17850	ENSMUSG00000058402	-0.395763	1.96548	1.58878	0.2075	0.583805
Zbtb43	2790	ENSMUSG00000026788	-0.230288	4.4194	1.5884	0.207555	0.583813
Arhgef2	8985	ENSMUSG00000028059	-0.202951	7.81242	1.58658	0.207815	0.584253
Clec4d	16431	ENSMUSG00000030144	-0.190373	8.87055	1.58551	0.207969	0.584539
Mfsd4	1222	ENSMUSG00000059149	-0.266355	3.5883	1.57946	0.208839	0.585973
Trip10	36397	ENSMUSG00000019487	-0.234101	4.47381	1.57809	0.209036	0.585973
Trim41	27636	ENSMUSG00000040365	-0.229337	5.45527	1.57798	0.209052	0.585973
Apba3	21042	ENSMUSG00000004931	-0.228838	4.81662	1.57807	0.209038	0.585973
Cbll1	31586	ENSMUSG00000020659	-0.222162	4.78267	1.5786	0.208963	0.585973
Smcr8	28039	ENSMUSG00000049323	-0.218097	6.62883	1.57944	0.208841	0.585973
Rala	30052	ENSMUSG00000008859	-0.230518	6.16606	1.57374	0.209665	0.587251
Csnk1g1	26094	ENSMUSG00000032384	-0.216997	4.91585	1.5717	0.20996	0.587783
Amn1	16903	ENSMUSG00000068250	-0.330145	2.01875	1.56901	0.210351	0.588584
Tlr6	13454	ENSMUSG00000051498	-0.291145	2.6282	1.56495	0.210942	0.589885
Hmga2	21457	ENSMUSG00000056758	-0.197073	8.37566	1.56244	0.211309	0.590237
Eef2	21032	ENSMUSG00000034994	-0.167731	11.7233	1.56104	0.211514	0.590316
Myl6	21595	ENSMUSG00000090841	-0.225828	7.89925	1.55917	0.211787	0.590838
Gm15453	1414	ENSMUSG00000081535	-0.401829	0.666176	1.55817	0.211933	0.591099
Nat6	26648	ENSMUSG00000079334	-0.297853	3.48419	1.5567	0.212149	0.591406
Ifitm2	19991	ENSMUSG00000060591	-0.233157	7.15735	1.55328	0.212652	0.592221
Pdap1	14751	ENSMUSG00000029623	-0.222396	7.70952	1.55094	0.212997	0.592689
Sltm	26155	ENSMUSG00000032212	-0.206424	7.26586	1.55071	0.213031	0.592689
Fth1	38185	ENSMUSG00000024661	-0.160696	12.7993	1.55107	0.212977	0.592689
Rilpl1	14372	ENSMUSG00000029392	-0.300332	2.50381	1.5473	0.213534	0.593519
Fam83h	33230	ENSMUSG00000046761	-0.259174	3.16672	1.54645	0.21366	0.593519
C1galt1	14926	ENSMUSG00000042460	-0.258631	3.60662	1.54635	0.213675	0.593519
Cul5	25870	ENSMUSG00000032030	-0.216905	6.15433	1.54634	0.213677	0.593519
Polr3a	23755	ENSMUSG00000025280	-0.212634	5.49129	1.54554	0.213795	0.593519
Aif1	35863	ENSMUSG00000024397	-0.322824	2.10078	1.54486	0.213895	0.593596
Gm13394	2627	ENSMUSG00000083773	-0.198015	9.36923	1.54458	0.213937	0.593596
Qtrtd1	34563	ENSMUSG00000022704	-0.230473	4.99719	1.54341	0.214111	0.593755
Clcn7	35437	ENSMUSG00000036636	-0.22393	5.1797	1.54204	0.214314	0.593755
Eif4a1	28256	ENSMUSG00000059796	-0.157717	10.7258	1.5417	0.214365	0.593755
Cox18	13700	ENSMUSG00000035505	-0.234351	5.1474	1.5412	0.21444	0.593816
Smap1	178	ENSMUSG00000026155	-0.225268	4.40362	1.54034	0.214567	0.593927
Zfp207	28678	ENSMUSG00000017421	-0.196925	8.28238	1.53885	0.21479	0.594347
Dvl1	12817	ENSMUSG00000029071	-0.214158	5.91878	1.53756	0.214981	0.594477
Sec61a1	16038	ENSMUSG00000030082	-0.182507	8.42565	1.53678	0.215097	0.594612
Lrrc8d	13911	ENSMUSG00000046079	-0.222899	6.82966	1.53634	0.215164	0.59465
Mocs1	36292	ENSMUSG00000064120	-0.232483	3.90673	1.53502	0.21536	0.594754
Atxn7l2	9547	ENSMUSG00000048997	-0.229888	4.1418	1.53511	0.215347	0.594754
Telo2	35435	ENSMUSG00000024170	-0.220924	5.8293	1.53542	0.215301	0.594754
Dnd1	37390	ENSMUSG00000044595	-0.421869	0.174485	1.53231	0.215766	0.595482
Serbp1	15678	ENSMUSG00000036371	-0.181545	10.2063	1.5322	0.215783	0.595482
Gm15853	1628	ENSMUSG00000089853	-0.444301	0.342392	1.53074	0.216002	0.595681
Sphk2	18305	ENSMUSG00000057342	-0.244916	5.86736	1.53045	0.216045	0.595681
Tshz1	37858	ENSMUSG00000046982	-0.2289	5.73316	1.53085	0.215985	0.595681
Noc4l	14031	ENSMUSG00000033294	-0.2189	6.7132	1.52766	0.216464	0.59638
Cep83	21247	ENSMUSG00000020024	-0.210305	6.08203	1.5253	0.216819	0.597022
Ttf1	2629	ENSMUSG00000026803	-0.217476	4.13603	1.52408	0.217004	0.597092
Fam120aos	30597	ENSMUSG00000097059	-0.338354	1.67369	1.52124	0.217432	0.597832
6530409C15Rik	15058	ENSMUSG00000043340	-0.436794	0.205477	1.51938	0.217714	0.598274
Zbed6	1258	ENSMUSG00000094410	-0.41542	2.88019	1.5184	0.217862	0.598274
Zfp646	19805	ENSMUSG00000049739	-0.22041	5.81115	1.51806	0.217913	0.598274
Llph	21456	ENSMUSG00000020224	-0.208986	6.07597	1.51872	0.217814	0.598274
Ammecr1l	37284	ENSMUSG00000041915	-0.220225	4.83378	1.51421	0.218498	0.598858
Iqgap1	18827	ENSMUSG00000030536	-0.166761	9.64177	1.51442	0.218466	0.598858
Srp72	13599	ENSMUSG00000036323	-0.203514	7.5588	1.51338	0.218624	0.599044
Nmd3	8812	ENSMUSG00000027787	-0.21375	6.71255	1.50798	0.219447	0.600332
Hspe1	443	ENSMUSG00000073676	-0.205802	7.88613	1.50307	0.220199	0.601902
Ssr3	8759	ENSMUSG00000027828	-0.186676	8.33601	1.50273	0.220251	0.601902
Rcor1	32466	ENSMUSG00000037896	-0.229076	5.87933	1.50126	0.220477	0.602373
Blnk	38617	ENSMUSG00000061132	-0.360023	3.42135	1.49723	0.221098	0.603538
Gm15427	1008	ENSMUSG00000081051	-0.223945	4.1491	1.49781	0.221008	0.603538
Tbp	35181	ENSMUSG00000014767	-0.218272	5.22761	1.49283	0.221777	0.604896
Sap30bp	29700	ENSMUSG00000020755	-0.224793	5.71077	1.49187	0.221927	0.605002
Elac2	28138	ENSMUSG00000020549	-0.221368	6.56557	1.49181	0.221936	0.605002
Gnl1	35935	ENSMUSG00000024429	-0.225617	6.35361	1.48934	0.222318	0.605637
Hspa12b	4561	ENSMUSG00000074793	-0.402289	0.392926	1.48709	0.222668	0.605987
Abcg1	35637	ENSMUSG00000024030	-0.310367	3.50373	1.48644	0.222769	0.605987
Tmem184c	22592	ENSMUSG00000031617	-0.215969	5.74392	1.48699	0.222684	0.605987
Wdr77	9486	ENSMUSG00000000561	-0.192935	7.72042	1.4862	0.222807	0.605987
Snx4	34417	ENSMUSG00000022808	-0.214566	6.10226	1.48442	0.223085	0.606255
Gm26852	17460	ENSMUSG00000097231	-0.386026	0.575223	1.4838	0.223181	0.606372
Rdh5	21622	ENSMUSG00000025350	-0.449515	0.296202	1.48143	0.223551	0.606789
Nck2	356	ENSMUSG00000066877	-0.363871	1.05781	1.47864	0.223988	0.607339
Rrp1	20887	ENSMUSG00000061032	-0.212936	7.959	1.47806	0.224078	0.607339
Gigyf2	871	ENSMUSG00000048000	-0.209799	6.20632	1.47898	0.223934	0.607339
Prrc2a	35860	ENSMUSG00000024393	-0.18558	9.5645	1.47823	0.224052	0.607339
Dancr	13560	ENSMUSG00000053656	-0.224868	3.7074	1.47636	0.224346	0.607633
Dvl3	34225	ENSMUSG00000003233	-0.228549	4.54511	1.47273	0.224915	0.608554
Fam13b	37328	ENSMUSG00000036501	-0.212384	4.85804	1.47313	0.224853	0.608554
[truncated: 9,241 more rows]

## Sheet: p65 LipidA Response
gene	order	genes	logFC	logCPM	LR	PValue	FDR
Il1b	4504	ENSMUSG00000027398	-11.9803	5.38414	1307.46	2.70581e-286	3.02266e-282
Il1a	4501	ENSMUSG00000027399	-10.3383	3.99649	745.806	3.27574e-164	1.82967e-160
Ccl22	22861	ENSMUSG00000031779	-7.02214	3.94692	551.585	5.69111e-122	2.11918e-118
Lif	27049	ENSMUSG00000034394	-7.31312	5.6467	546.808	6.23005e-121	1.7399e-117
Col5a3	25319	ENSMUSG00000004098	-5.57146	3.95797	522.223	1.38958e-115	3.10461e-112
Tnf	35868	ENSMUSG00000024401	-2.82643	8.48236	504.145	1.19128e-111	2.21796e-108
Ccl5	28747	ENSMUSG00000035042	-5.90794	4.13635	434.888	1.40297e-96	2.23893e-93
Ccl4	28753	ENSMUSG00000018930	-4.93592	7.37245	434.476	1.72468e-96	2.40831e-93
Tnfaip3	20267	ENSMUSG00000019850	-3.0795	4.30059	374.559	1.90339e-83	2.36254e-80
Il4i1	18223	ENSMUSG00000074141	-3.85407	4.49303	368.27	4.45577e-82	4.97754e-79
Csf3	29152	ENSMUSG00000038067	-7.84799	2.57545	359.526	3.57177e-80	3.62729e-77
Irg1	25002	ENSMUSG00000022126	-5.94488	8.93068	352.115	1.46715e-78	1.36579e-75
Slc7a11	8606	ENSMUSG00000027737	-2.17197	6.98712	334.334	1.0935e-74	9.39653e-72
Ccl3	28752	ENSMUSG00000000982	-4.00544	9.0371	311.635	9.61668e-70	7.67343e-67
Cd40	5275	ENSMUSG00000017652	-3.88016	4.19707	282.339	2.32227e-63	1.72947e-60
Lilrb4	20568	ENSMUSG00000062593	-2.46474	7.57664	280.092	7.16967e-63	5.00577e-60
Cd83	30545	ENSMUSG00000015396	-3.46016	4.36621	267.898	3.25838e-60	2.14114e-57
Gm12840	11679	ENSMUSG00000086320	-3.05013	4.3687	250.478	2.04246e-56	1.26758e-53
Gpr84	33895	ENSMUSG00000063234	-2.41358	7.75754	249.632	3.12416e-56	1.83684e-53
Cxcl2	13716	ENSMUSG00000058427	-6.68617	6.48869	247.542	8.91845e-56	4.9814e-53
Tnfaip2	32475	ENSMUSG00000021281	-2.97722	7.97774	243.489	6.823e-55	3.62951e-52
null	17668	ENSMUSG00000098495	-2.38568	4.31093	240.747	2.7026e-54	1.37231e-51
Gp49a	20567	ENSMUSG00000089672	-2.88849	6.49389	236.827	1.9347e-53	9.39677e-51
Pdgfb	33393	ENSMUSG00000000489	-2.1881	7.86643	228.91	1.03051e-51	4.79659e-49
Ccrl2	26791	ENSMUSG00000043953	-6.54656	1.78455	222.858	2.15232e-50	9.61741e-48
Ccl9	28748	ENSMUSG00000019122	-1.87476	8.88526	219.952	9.26629e-50	3.9813e-47
Pou2f2	17670	ENSMUSG00000008496	-2.06267	4.93365	201.468	9.98964e-46	4.13312e-43
Phlda1	21371	ENSMUSG00000020205	-2.85631	3.86121	200.385	1.72089e-45	6.86574e-43
Gm26809	15006	ENSMUSG00000097815	-2.17125	7.64043	197.317	8.04193e-45	3.09781e-42
null	17669	ENSMUSG00000099297	-2.12357	5.43323	196.025	1.53892e-44	5.73043e-42
Pim1	35613	ENSMUSG00000024014	-2.39204	4.43602	194.084	4.08243e-44	1.47112e-41
Tnc	10941	ENSMUSG00000028364	-4.03365	4.57745	184.713	4.53405e-42	1.53484e-39
Axl	17701	ENSMUSG00000002602	-2.34808	4.00077	184.714	4.53082e-42	1.53484e-39
Il27	19719	ENSMUSG00000044701	-3.68861	2.74754	177.843	1.43352e-40	4.70997e-38
Src	5091	ENSMUSG00000027646	-4.23374	2.53555	177.774	1.48425e-40	4.7373e-38
Tnip1	27843	ENSMUSG00000020400	-1.72862	7.88763	170.376	6.12359e-39	1.90018e-36
Kctd12	24998	ENSMUSG00000098557	-2.9678	5.4546	170.223	6.61524e-39	1.99727e-36
Ikbke	1207	ENSMUSG00000042349	-2.64887	6.46768	167.445	2.67399e-38	7.86081e-36
P2rx5	28415	ENSMUSG00000005950	-3.51667	2.12917	156.452	6.74271e-36	1.93135e-33
Fgr	12120	ENSMUSG00000028874	-1.79467	6.75831	156.131	7.9253e-36	2.21334e-33
Dusp5	38802	ENSMUSG00000034765	-2.69013	5.59624	155.249	1.23507e-35	3.36511e-33
Hdc	4420	ENSMUSG00000027360	-4.34214	2.1756	154.883	1.48518e-35	3.95023e-33
Slc31a2	10896	ENSMUSG00000066152	-1.90843	4.0616	152.801	4.23413e-35	1.09999e-32
Rasgef1b	13822	ENSMUSG00000029333	-2.17179	3.83951	147.529	6.01191e-34	1.52634e-31
Mmp14	24490	ENSMUSG00000000957	-7.22884	0.88765	147.115	7.40737e-34	1.83884e-31
Slfn2	28727	ENSMUSG00000072620	-2.42031	7.7605	145.125	2.0166e-33	4.89728e-31
Pde4b	11370	ENSMUSG00000028525	-2.48486	4.09912	143.532	4.49715e-33	1.06889e-30
Jdp2	32063	ENSMUSG00000034271	-1.99466	7.60574	141.97	9.87373e-33	2.29791e-30
Ptgs2	1412	ENSMUSG00000032487	-1.83278	8.43919	141.202	1.45368e-32	3.31409e-30
Marcksl1	12010	ENSMUSG00000047945	-2.25168	8.86298	138.495	5.68043e-32	1.26912e-29
Icam1	25332	ENSMUSG00000037405	-1.66986	7.03112	138.41	5.92823e-32	1.29852e-29
Zc3h12a	11903	ENSMUSG00000042677	-2.01853	5.80515	135.495	2.57345e-31	5.52846e-29
Ier3	35915	ENSMUSG00000003541	-2.1561	6.20504	134.901	3.47061e-31	7.31513e-29
Mt2	22843	ENSMUSG00000031762	-1.55943	6.72657	134.577	4.08516e-31	8.45099e-29
Ehd1	38063	ENSMUSG00000024772	-1.47442	8.66584	132.723	1.03938e-30	2.11107e-28
Plaur	17638	ENSMUSG00000046223	-1.45491	8.24032	131.801	1.65354e-30	3.29851e-28
null	26401	ENSMUSG00000096581	-1.88025	5.30719	130.871	2.64217e-30	5.17818e-28
Nlrp3	27978	ENSMUSG00000032691	-1.62277	7.03045	128.331	9.50155e-30	1.83003e-27
Kdm6b	28237	ENSMUSG00000018476	-1.71541	6.18635	128.203	1.01335e-29	1.91868e-27
Gadd45b	21019	ENSMUSG00000015312	-2.66301	5.06033	127.881	1.19194e-29	2.2192e-27
Zyx	15345	ENSMUSG00000029860	-1.56269	5.90012	127.11	1.75758e-29	3.21868e-27
Clec4e	16432	ENSMUSG00000030142	-1.68004	8.39025	124.68	5.97949e-29	1.07737e-26
Timp1	6012	ENSMUSG00000001131	-4.09126	2.55078	124.325	7.15004e-29	1.26783e-26
Ltb	35866	ENSMUSG00000024399	-1.78239	4.94419	124.135	7.87039e-29	1.37375e-26
Itga5	33897	ENSMUSG00000000555	-1.47771	9.35798	122.546	1.75334e-28	3.01332e-26
Traf1	2819	ENSMUSG00000026875	-2.5591	6.2482	121.505	2.96276e-28	5.0147e-26
Myc	33094	ENSMUSG00000022346	-2.46489	5.70542	120.876	4.06702e-28	6.78099e-26
Il10ra	25760	ENSMUSG00000032089	-1.62971	4.70133	119.977	6.40088e-28	1.05153e-25
Nos2	28638	ENSMUSG00000020826	-5.68443	1.00424	119.489	8.18448e-28	1.32506e-25
Gfod1	30538	ENSMUSG00000051335	-1.53352	6.00671	118.651	1.24854e-27	1.99249e-25
Nfkbiz	34659	ENSMUSG00000035356	-2.32509	4.98907	116.392	3.89959e-27	6.13554e-25
Nfkb1	9793	ENSMUSG00000028163	-1.52053	8.28908	116.113	4.49081e-27	6.96761e-25
Plek2	31940	ENSMUSG00000021118	-3.33007	1.48049	114.842	8.52418e-27	1.30443e-24
Nfkbie	36180	ENSMUSG00000023947	-2.0382	5.0127	113.54	1.64352e-26	2.48105e-24
Slc4a7	23665	ENSMUSG00000021733	-1.24212	6.99826	113.274	1.87922e-26	2.79904e-24
Cpd	28551	ENSMUSG00000020841	-1.24883	8.45026	111.55	4.48278e-26	6.5891e-24
2500002B13Rik	22321	ENSMUSG00000096917	-2.64739	2.56254	111.409	4.81336e-26	6.98312e-24
Myo1e	26147	ENSMUSG00000032220	-1.38324	7.83637	109.796	1.08639e-25	1.55591e-23
Xirp1	26896	ENSMUSG00000079243	-2.01796	5.51646	108.597	1.98902e-25	2.81257e-23
Bcl3	17488	ENSMUSG00000053175	-1.7524	5.07245	108.421	2.17365e-25	3.03523e-23
Cd14	37385	ENSMUSG00000051439	-1.17212	9.84411	108.241	2.38032e-25	3.28278e-23
Hck	4939	ENSMUSG00000003283	-1.38543	7.16404	104.626	1.4752e-24	2.00969e-22
Fas	38522	ENSMUSG00000024778	-4.62431	3.52457	104.394	1.65837e-24	2.23201e-22
Srgn	20697	ENSMUSG00000020077	-1.05947	8.14914	103.407	2.72869e-24	3.62884e-22
Aim1l	12163	ENSMUSG00000012123	-2.00097	2.91615	103.019	3.31925e-24	4.3272e-22
Dst	237	ENSMUSG00000026131	-1.18756	7.19242	103.012	3.3313e-24	4.3272e-22
Saa3	18334	ENSMUSG00000040026	-3.79552	1.70717	101.959	5.66851e-24	7.2785e-22
Arhgef3	23806	ENSMUSG00000021895	-2.12194	3.5377	101.108	8.70848e-24	1.10548e-21
Rab11fip1	22102	ENSMUSG00000031488	-1.33874	5.4104	100.969	9.34326e-24	1.17274e-21
Tpbg	26362	ENSMUSG00000035274	-4.35961	0.812575	100.371	1.26369e-23	1.56852e-21
Egr1	37345	ENSMUSG00000038418	-2.36929	3.54252	100.21	1.37084e-23	1.68282e-21
Csf1	9522	ENSMUSG00000014599	-4.4722	1.21166	98.7306	2.89303e-23	3.49794e-21
Itgax	19821	ENSMUSG00000030789	-3.03219	1.74021	98.7176	2.91208e-23	3.49794e-21
Sh2d5	12295	ENSMUSG00000045349	-1.72805	3.93976	98.2235	3.73729e-23	4.44141e-21
Sdc4	5229	ENSMUSG00000017009	-2.0235	8.30942	96.8884	7.33474e-23	8.62488e-21
Cxcl10	13743	ENSMUSG00000034855	-3.17735	6.52232	94.1961	2.85764e-22	3.32528e-20
Nfkbia	31732	ENSMUSG00000021025	-1.50782	7.60669	92.9581	5.34143e-22	6.15146e-20
Cdc42ep2	38033	ENSMUSG00000045664	-3.12766	2.61504	92.8175	5.73445e-22	6.53669e-20
Igsf3	9412	ENSMUSG00000042035	-1.74479	4.17702	91.3639	1.1954e-21	1.34887e-19
Gpr132	32513	ENSMUSG00000021298	-2.63739	1.71903	91.0293	1.41563e-21	1.5814e-19
Cd274	38469	ENSMUSG00000016496	-2.19613	2.7772	90.9448	1.47737e-21	1.63403e-19
2010300C02Rik	290	ENSMUSG00000026090	-4.3788	0.559157	90.3294	2.01635e-21	2.20829e-19
Lrrc25	22467	ENSMUSG00000049988	-1.33179	4.35225	89.6888	2.7873e-21	3.023e-19
Socs3	29785	ENSMUSG00000053113	-2.2862	7.12498	89.4994	3.06731e-21	3.2947e-19
Plekho2	26084	ENSMUSG00000050721	-1.15874	7.46559	89.2228	3.52757e-21	3.753e-19
Bcl2a1b	26414	ENSMUSG00000089929	-1.69827	4.05394	88.8109	4.34426e-21	4.57828e-19
Lpar1	10807	ENSMUSG00000038668	-1.86081	4.06442	88.7682	4.43885e-21	4.63424e-19
Serpine1	14548	ENSMUSG00000037411	-1.44099	8.0233	85.4617	2.36228e-20	2.44343e-18
Fndc7	9575	ENSMUSG00000045326	-2.59288	1.89867	85.4103	2.42454e-20	2.48482e-18
Tmem2	38391	ENSMUSG00000024754	-1.39334	4.26429	85.3526	2.4963e-20	2.5351e-18
Btg1	21267	ENSMUSG00000036478	-1.22012	7.89456	85.267	2.6068e-20	2.60005e-18
Il1rn	2430	ENSMUSG00000026981	-1.87661	4.43936	84.4207	3.99948e-20	3.95382e-18
Dpep2	23007	ENSMUSG00000053687	-1.22005	5.27627	82.3274	1.15311e-19	1.12995e-17
Adora2b	28080	ENSMUSG00000018500	-1.83674	4.05115	82.0321	1.33892e-19	1.30061e-17
Ptprn	722	ENSMUSG00000026204	-2.51994	1.8458	81.8983	1.43274e-19	1.37975e-17
Rhbdf2	29735	ENSMUSG00000020806	-1.19649	6.92925	81.7005	1.5835e-19	1.5119e-17
Actg1	29850	ENSMUSG00000062825	-0.981658	9.96772	81.6411	1.63184e-19	1.54486e-17
Nes	8947	ENSMUSG00000004891	-2.14359	3.33535	81.5917	1.67317e-19	1.57067e-17
Dusp2	4442	ENSMUSG00000027368	-1.81311	4.68731	80.2884	3.23562e-19	3.01209e-17
Zc3h12c	25856	ENSMUSG00000035164	-1.24068	5.39099	79.6912	4.37735e-19	4.04127e-17
Pik3r5	28191	ENSMUSG00000020901	-0.944509	7.87004	79.4159	5.032e-19	4.60758e-17
Bcl6b	28304	ENSMUSG00000000317	-3.00076	1.39752	78.5381	7.84695e-19	7.06922e-17
Hcar2	14348	ENSMUSG00000045502	-2.6755	3.70018	78.1675	9.46616e-19	8.45972e-17
Ptger2	24118	ENSMUSG00000037759	-4.10328	0.53978	77.9636	1.04957e-18	9.30539e-17
Olr1	16606	ENSMUSG00000030162	-1.56852	4.48542	77.2192	1.53002e-18	1.34581e-16
Pdcd1	1004	ENSMUSG00000026285	-1.38316	7.00837	76.2373	2.5155e-18	2.19536e-16
Ccl2	28696	ENSMUSG00000035385	-1.96432	3.04712	75.8796	3.01495e-18	2.61085e-16
Il2rg	7198	ENSMUSG00000031304	-1.24957	4.80097	72.3152	1.83427e-17	1.5762e-15
Traf5	1988	ENSMUSG00000026637	-1.72638	2.82421	72.1693	1.97508e-17	1.68425e-15
Rhoc	9470	ENSMUSG00000002233	-1.22862	7.41765	71.8702	2.2983e-17	1.94502e-15
Bcl2l11	4464	ENSMUSG00000027381	-1.37347	5.02568	71.2796	3.10023e-17	2.60396e-15
Tgfb1	17698	ENSMUSG00000002603	-0.913391	8.23079	71.2396	3.16381e-17	2.63753e-15
Slc6a4	28555	ENSMUSG00000020838	-3.24061	1.63266	70.7036	4.15144e-17	3.43524e-15
Fbxo15	37871	ENSMUSG00000034391	-1.52125	3.69194	70.5717	4.4383e-17	3.64561e-15
Icosl	20878	ENSMUSG00000000732	-1.53894	3.29034	69.3306	8.32687e-17	6.78974e-15
Mylk2	4931	ENSMUSG00000027470	-2.43051	1.6898	69.2045	8.87635e-17	7.18534e-15
Slc2a1	11739	ENSMUSG00000028645	-0.894949	8.03011	68.8486	1.06322e-16	8.54478e-15
St3gal1	33138	ENSMUSG00000013846	-1.12321	5.24713	68.1501	1.5151e-16	1.20894e-14
Sqstm1	27694	ENSMUSG00000015837	-0.996734	9.45552	68.0316	1.60894e-16	1.27471e-14
Vmp1	28822	ENSMUSG00000018171	-1.01162	6.85632	67.7921	1.81675e-16	1.42922e-14
Sema4b	18807	ENSMUSG00000030539	-1.12908	5.4493	67.1084	2.56986e-16	2.00755e-14
Zfp36	17788	ENSMUSG00000044786	-1.11655	6.67182	66.0461	4.40494e-16	3.41719e-14
Serpinb6b	30427	ENSMUSG00000042842	-2.22068	2.53656	65.9931	4.52513e-16	3.48622e-14
Glrx	30986	ENSMUSG00000021591	-1.41234	7.27542	65.0676	7.23732e-16	5.53754e-14
Grap	28068	ENSMUSG00000004837	-1.146	5.36567	64.3721	1.03006e-15	7.82774e-14
Nfkb2	38734	ENSMUSG00000025225	-1.50644	6.50124	64.065	1.20383e-15	9.08646e-14
Ptprj	3813	ENSMUSG00000025314	-1.42883	7.46027	63.8744	1.32609e-15	9.94215e-14
Znrf1	23121	ENSMUSG00000033545	-1.2206	4.70976	63.6291	1.50198e-15	1.11857e-13
9130230L23Rik	13475	ENSMUSG00000054598	-2.13979	1.74995	63.3226	1.75479e-15	1.2982e-13
Stx11	20225	ENSMUSG00000039232	-2.00234	1.78913	62.9063	2.16773e-15	1.58272e-13
Gsap	12998	ENSMUSG00000039934	-1.19321	6.21383	62.6779	2.43433e-15	1.76584e-13
C3	36394	ENSMUSG00000024164	-1.68726	3.25058	61.4435	4.55636e-15	3.28381e-13
Tnfrsf9	12698	ENSMUSG00000028965	-3.67844	0.228954	61.3896	4.68267e-15	3.35321e-13
Bcl2l1	4928	ENSMUSG00000007659	-1.49782	6.36135	61.1476	5.29527e-15	3.76774e-13
Abhd5	26941	ENSMUSG00000032540	-1.14452	5.87782	60.4394	7.58778e-15	5.36476e-13
Ripk2	10161	ENSMUSG00000041135	-1.29162	5.74824	60.1682	8.70886e-15	6.11866e-13
Rbfox1	33975	ENSMUSG00000008658	-1.08142	6.01851	59.9976	9.4974e-15	6.63096e-13
Relb	17476	ENSMUSG00000002983	-1.57671	4.49718	59.416	1.27627e-14	8.85539e-13
Rassf4	16318	ENSMUSG00000042129	-1.27435	7.32928	59.1114	1.48994e-14	1.02111e-12
Ets2	34988	ENSMUSG00000022895	-1.14975	7.25406	59.1185	1.48456e-14	1.02111e-12
Hivep3	11769	ENSMUSG00000028634	-1.92847	4.90037	59.0309	1.55214e-14	1.05725e-12
Slc26a9	1215	ENSMUSG00000042268	-2.74681	1.20391	58.2491	2.30948e-14	1.56359e-12
Cybb	5866	ENSMUSG00000015340	-0.890959	8.7832	58.1054	2.48446e-14	1.67192e-12
Xcr1	26977	ENSMUSG00000060509	-2.38318	1.2847	57.6165	3.18537e-14	2.13076e-12
Atf3	1972	ENSMUSG00000026628	-1.53686	4.66545	57.4173	3.5249e-14	2.34385e-12
Lcp2	27484	ENSMUSG00000002699	-1.15395	7.47546	57.2577	3.82288e-14	2.52583e-12
Smox	4578	ENSMUSG00000027333	-0.906604	7.06887	57.247	3.8438e-14	2.52583e-12
Slc11a2	33775	ENSMUSG00000023030	-1.20268	5.939	57.1391	4.06051e-14	2.65263e-12
Murc	10668	ENSMUSG00000028348	-2.05187	1.89236	57.0989	4.14441e-14	2.6917e-12
Mtmr7	22194	ENSMUSG00000039431	-2.52374	2.87199	56.853	4.6963e-14	3.03251e-12
Srxn1	4889	ENSMUSG00000032802	-0.859486	7.76208	56.016	7.18835e-14	4.615e-12
Abtb2	3985	ENSMUSG00000032724	-2.28675	1.11619	55.6436	8.68757e-14	5.51414e-12
Arhgap23	29082	ENSMUSG00000049807	-1.05022	4.27959	55.2711	1.05e-13	6.62685e-12
Wisp1	33134	ENSMUSG00000005124	-1.98852	2.00012	55.1105	1.13941e-13	7.15076e-12
Tlr2	8886	ENSMUSG00000027995	-0.836639	8.45958	54.8834	1.27896e-13	7.98171e-12
Dcbld2	34690	ENSMUSG00000035107	-1.33523	4.71063	54.7778	1.34957e-13	8.32933e-12
Ahnak2	32510	ENSMUSG00000072812	-2.57891	3.73947	54.4784	1.57164e-13	9.64657e-12
Edn1	30530	ENSMUSG00000021367	-3.35681	0.762928	53.9302	2.0774e-13	1.26812e-11
Agpat4	35110	ENSMUSG00000023827	-1.333	5.07449	53.866	2.14637e-13	1.30311e-11
Psd	38735	ENSMUSG00000037126	-1.5354	3.20687	53.5293	2.5476e-13	1.53007e-11
Junb	22719	ENSMUSG00000052837	-1.00315	8.4222	53.1398	3.10636e-13	1.85568e-11
Ptafr	12107	ENSMUSG00000056529	-1.78379	2.30701	53.0333	3.27941e-13	1.94863e-11
Stap1	13635	ENSMUSG00000029254	-1.18094	6.17653	52.2909	4.78586e-13	2.81384e-11
Stx6	1469	ENSMUSG00000026470	-0.918752	5.66874	51.9597	5.66512e-13	3.31335e-11
Rgs16	1453	ENSMUSG00000026475	-2.14522	7.88861	51.8447	6.0068e-13	3.49489e-11
Atxn1	30562	ENSMUSG00000046876	-1.00695	5.27339	51.706	6.44659e-13	3.73134e-11
Scin	31646	ENSMUSG00000002565	-1.88274	1.84289	51.5889	6.84288e-13	3.9403e-11
Rnf19b	11988	ENSMUSG00000028793	-1.08435	6.50045	51.2914	7.96242e-13	4.56144e-11
Mmp9	5271	ENSMUSG00000017737	-3.00059	0.913815	51.1868	8.39826e-13	4.78658e-11
Phldb1	25738	ENSMUSG00000048537	-0.952266	6.59378	50.8527	9.9563e-13	5.61726e-11
Cd82	3896	ENSMUSG00000027215	-0.939402	5.90266	50.8134	1.01578e-12	5.70216e-11
Lrrc16a	30298	ENSMUSG00000021338	-1.57448	2.91068	50.5553	1.15856e-12	6.43894e-11
Arc	33179	ENSMUSG00000022602	-1.34641	2.84425	50.4004	1.2537e-12	6.93322e-11
Errfi1	12696	ENSMUSG00000028967	-1.16367	4.49631	49.49	1.99383e-12	1.08122e-10
Nod2	22793	ENSMUSG00000055994	-2.23707	2.81028	49.4499	2.03504e-12	1.09823e-10
Odc1	31486	ENSMUSG00000011179	-1.42495	10.2745	49.2742	2.22566e-12	1.19533e-10
Spi1	3832	ENSMUSG00000002111	-0.697925	9.09312	48.954	2.62037e-12	1.40058e-10
Fnbp1l	9677	ENSMUSG00000039735	-0.736405	8.07806	48.5813	3.16871e-12	1.67761e-10
Cyp2s1	17702	ENSMUSG00000040703	-1.43683	3.25586	48.5648	3.19546e-12	1.6838e-10
Nfkbib	17806	ENSMUSG00000030595	-1.13538	5.96401	48.4849	3.3285e-12	1.74566e-10
Sod2	35137	ENSMUSG00000006818	-0.849935	7.24411	48.0876	4.07593e-12	2.12768e-10
Pde1b	33902	ENSMUSG00000022489	-1.05267	6.39026	48.0165	4.22645e-12	2.19598e-10
Pxn	14169	ENSMUSG00000029528	-0.732076	8.59853	47.7264	4.90057e-12	2.53445e-10
Frmd6	31855	ENSMUSG00000048285	-1.75656	1.65574	47.1287	6.64744e-12	3.42205e-10
Ksr2	14208	ENSMUSG00000061578	-2.43468	1.148	47.0911	6.77634e-12	3.46155e-10
Nfkbid	17884	ENSMUSG00000036931	-0.878595	6.42654	47.0372	6.96528e-12	3.53678e-10
Myo1d	28681	ENSMUSG00000035441	-0.991899	5.27352	46.8847	7.52887e-12	3.80565e-10
Kctd11	28279	ENSMUSG00000046731	-1.39377	3.23126	45.9499	1.21314e-11	6.10452e-10
Slc11a1	682	ENSMUSG00000026177	-0.803716	7.08823	45.7851	1.31963e-11	6.58106e-10
Gm7592	819	ENSMUSG00000090186	-2.99459	1.95549	45.5789	1.46609e-11	7.27899e-10
Pcdh7	13422	ENSMUSG00000029108	-0.715008	8.36917	45.1367	1.83745e-11	9.04238e-10
Irak2	16263	ENSMUSG00000060477	-1.32753	6.14321	45.0368	1.93367e-11	9.43278e-10
Nr1d1	29156	ENSMUSG00000020889	-0.961807	4.44225	44.6844	2.31492e-11	1.12435e-09
Sertad1	17751	ENSMUSG00000008384	-0.985563	4.63614	44.541	2.49086e-11	1.1949e-09
Dcstamp	32964	ENSMUSG00000022303	-1.11258	4.68085	43.8107	3.61728e-11	1.705e-09
Slc15a3	38214	ENSMUSG00000024737	-1.53407	5.05672	43.586	4.05726e-11	1.90435e-09
Rilpl2	14369	ENSMUSG00000029401	-1.00961	4.95725	43.5335	4.16771e-11	1.9399e-09
Cdyl2	23160	ENSMUSG00000031758	-0.959541	4.01298	43.0982	5.20612e-11	2.39331e-09
Zfp827	22604	ENSMUSG00000071064	-1.04102	4.42371	42.9355	5.65745e-11	2.57957e-09
Csrnp1	26895	ENSMUSG00000032515	-1.21478	4.33749	42.2672	7.96154e-11	3.51535e-09
Oasl1	14135	ENSMUSG00000041827	-3.24932	8.56081	42.1904	8.28054e-11	3.64181e-09
1110002J07Rik	20733	ENSMUSG00000097134	-1.31425	2.73067	41.834	9.93607e-11	4.35278e-09
Ptges	2694	ENSMUSG00000050737	-1.54403	2.58561	41.8081	1.00687e-10	4.39364e-09
Swap70	19514	ENSMUSG00000031015	-0.782621	7.62356	41.6972	1.06563e-10	4.63197e-09
3110043O21Rik	10363	ENSMUSG00000028300	-1.05896	5.27771	41.6174	1.11001e-10	4.80617e-09
Mx2	35013	ENSMUSG00000023341	-4.20695	5.11294	41.4116	1.23321e-10	5.319e-09
Cd44	3971	ENSMUSG00000005087	-0.722066	9.32633	41.3856	1.24977e-10	5.36968e-09
Dot1l	21005	ENSMUSG00000061589	-0.66153	8.09524	41.1424	1.41536e-10	6.05784e-09
Cdkn1a	35601	ENSMUSG00000023067	-0.672541	8.56333	40.9878	1.5318e-10	6.53119e-09
Ifitm3	19993	ENSMUSG00000025492	-0.766365	8.07558	40.9352	1.57357e-10	6.6838e-09
Tsc22d1	24896	ENSMUSG00000022010	-1.21509	6.05273	40.9023	1.60029e-10	6.77154e-09
Gm14636	5978	ENSMUSG00000073274	-1.81007	1.39432	40.8829	1.6163e-10	6.81346e-09
Birc3	25177	ENSMUSG00000032000	-0.873396	5.44057	40.6726	1.79992e-10	7.55897e-09
Abr	28544	ENSMUSG00000017631	-0.802057	8.05557	40.2045	2.28724e-10	9.53387e-09
Vgf	14546	ENSMUSG00000037428	-1.51228	3.23807	40.1841	2.31122e-10	9.598e-09
Rbpms2	26086	ENSMUSG00000032387	-1.82489	1.92263	39.981	2.56451e-10	1.05713e-08
Abca1	10724	ENSMUSG00000015243	-2.24533	0.467631	39.9255	2.63841e-10	1.08359e-08
Ninj1	30599	ENSMUSG00000037966	-0.719718	7.37968	39.8065	2.80403e-10	1.14321e-08
Peli1	27271	ENSMUSG00000020134	-1.52803	5.50046	39.7516	2.884e-10	1.17153e-08
Cxcl11	13744	ENSMUSG00000060183	-2.73213	2.19674	39.6798	2.99211e-10	1.21104e-08
Batf2	38053	ENSMUSG00000039699	-2.35587	1.46222	39.4831	3.3091e-10	1.33451e-08
Ell2	30984	ENSMUSG00000001542	-0.803639	7.24181	39.4153	3.42604e-10	1.3767e-08
Gm20645	27332	ENSMUSG00000093470	-0.878529	5.36765	38.9528	4.34179e-10	1.71993e-08
Icam5	25335	ENSMUSG00000032174	-1.47806	2.18264	38.7356	4.85283e-10	1.91558e-08
Plagl2	4943	ENSMUSG00000051413	-0.99248	5.94633	38.6359	5.10707e-10	1.99479e-08
Plek	27216	ENSMUSG00000020120	-0.930075	8.32947	38.5371	5.37217e-10	2.08377e-08
Casp4	25154	ENSMUSG00000033538	-1.51733	3.30246	38.3487	5.9166e-10	2.27911e-08
Fyb	32750	ENSMUSG00000022148	-0.695894	7.02463	38.1771	6.46066e-10	2.48014e-08
Cln5	25003	ENSMUSG00000022125	-0.832622	6.33283	38.1068	6.69766e-10	2.56232e-08
Shisa3	13497	ENSMUSG00000050010	-1.7033	1.22679	37.6644	8.4023e-10	3.19259e-08
Tmem171	31165	ENSMUSG00000052485	-1.42882	3.33877	37.5505	8.90754e-10	3.37309e-08
Ptpn5	18348	ENSMUSG00000030854	-0.837587	4.40794	36.9908	1.18686e-09	4.4048e-08
Flnb	23615	ENSMUSG00000025278	-0.688803	7.849	36.7151	1.36714e-09	5.05708e-08
Maff	33367	ENSMUSG00000042622	-1.43857	1.8876	36.3508	1.64815e-09	6.05641e-08
Rel	27333	ENSMUSG00000020275	-0.936778	3.8815	36.0421	1.93097e-09	7.04931e-08
Mfap3l	22336	ENSMUSG00000031647	-1.34198	2.21764	35.994	1.97921e-09	7.20189e-08
Ocstamp	5284	ENSMUSG00000027670	-1.16783	4.93047	35.7113	2.28835e-09	8.29974e-08
Mybpc3	3833	ENSMUSG00000002100	-1.3833	1.97733	35.3427	2.76506e-09	9.99626e-08
Prkcd	23827	ENSMUSG00000021948	-0.701393	7.5776	35.1787	3.00788e-09	1.0839e-07
Coq10b	441	ENSMUSG00000025981	-0.830881	4.2594	34.8731	3.51907e-09	1.25196e-07
Dus2	23009	ENSMUSG00000031901	-0.859037	5.31524	34.8007	3.65239e-09	1.29117e-07
Jak2	38465	ENSMUSG00000024789	-0.871265	5.77619	34.6108	4.02667e-09	1.41899e-07
Slc2a6	2578	ENSMUSG00000036067	-0.95707	5.32411	34.464	4.34198e-09	1.52051e-07
Scimp	28348	ENSMUSG00000057135	-1.9576	1.28974	34.1968	4.98102e-09	1.73884e-07
Lasp1	29105	ENSMUSG00000038366	-0.779853	8.22138	34.0807	5.28719e-09	1.83426e-07
Gbp3	9846	ENSMUSG00000028268	-3.02238	1.87275	33.9571	5.63417e-09	1.94859e-07
Nupr1	19720	ENSMUSG00000030717	-0.984411	4.69472	33.9491	5.65717e-09	1.9505e-07
Aldh4a1	12340	ENSMUSG00000028737	-1.01973	3.74304	33.7175	6.37242e-09	2.18363e-07
Olfr934	25606	ENSMUSG00000057424	-1.13042	2.77551	33.596	6.78331e-09	2.31025e-07
Mfsd12	21051	ENSMUSG00000034854	-0.700148	6.84126	33.5192	7.05648e-09	2.38873e-07
Evi2a	28652	ENSMUSG00000078771	-0.900664	6.43991	33.4474	7.32173e-09	2.47103e-07
Mir22hg	28512	ENSMUSG00000085148	-0.778319	4.43627	33.4328	7.37709e-09	2.48221e-07
Klf7	576	ENSMUSG00000025959	-0.941502	3.42652	33.4068	7.47616e-09	2.50799e-07
Nadk	12790	ENSMUSG00000029063	-0.584007	8.33021	33.2995	7.90021e-09	2.64231e-07
Clec7a	16605	ENSMUSG00000079293	-0.878853	3.84357	33.2093	8.27529e-09	2.75129e-07
Spryd7	24673	ENSMUSG00000021930	-1.08775	6.11416	33.1991	8.31894e-09	2.75759e-07
Cd52	12164	ENSMUSG00000000682	-0.778886	6.77545	33.1631	8.47454e-09	2.80086e-07
Itgb2	20847	ENSMUSG00000000290	-0.603479	8.23029	33.112	8.70008e-09	2.86692e-07
Flrt2	32157	ENSMUSG00000047414	-1.0427	5.34126	32.8629	9.88912e-09	3.24011e-07
Pip5k1b	38417	ENSMUSG00000024867	-0.773002	6.13173	32.6419	1.10802e-08	3.60865e-07
Rapgef2	8843	ENSMUSG00000062232	-0.731431	5.44189	32.5621	1.15446e-08	3.74899e-07
Atp2b1	21277	ENSMUSG00000019943	-0.65813	7.73205	32.2583	1.3498e-08	4.30819e-07
Gm26667	34825	ENSMUSG00000097418	-1.86799	0.920351	32.2371	1.36462e-08	4.34308e-07
Gm7278	1438	ENSMUSG00000080950	-1.38361	4.1023	32.0741	1.48399e-08	4.68296e-07
Myo10	32845	ENSMUSG00000022272	-0.738569	7.48101	32.0436	1.50752e-08	4.7438e-07
Rarg	33844	ENSMUSG00000001288	-0.804829	4.0706	32.0021	1.54007e-08	4.83263e-07
Isg15	12840	ENSMUSG00000035692	-3.65921	5.16279	31.9011	1.62229e-08	5.07636e-07
Car13	8364	ENSMUSG00000027555	-1.06943	3.00618	31.7602	1.74432e-08	5.36798e-07
Fam171b	3449	ENSMUSG00000048388	-2.43217	0.243845	31.7229	1.77814e-08	5.44208e-07
Oas1b	14255	ENSMUSG00000029605	-2.1859	3.97902	31.4354	2.06188e-08	6.25905e-07
Mustn1	23833	ENSMUSG00000042485	-1.59299	1.52736	31.2599	2.25697e-08	6.83267e-07
Xylt2	28959	ENSMUSG00000020868	-1.0051	5.46936	31.2442	2.27525e-08	6.86941e-07
Usp18	16386	ENSMUSG00000030107	-3.26608	6.16523	31.2021	2.32519e-08	7.00127e-07
Mapkapk2	1201	ENSMUSG00000016528	-0.749684	8.8606	30.9064	2.70775e-08	8.13124e-07
Mndal	1784	ENSMUSG00000090272	-1.522	6.21561	30.3685	3.57292e-08	1.0587e-06
Rab32	20204	ENSMUSG00000019832	-0.722405	5.77515	30.37	3.57011e-08	1.0587e-06
Jade2	27752	ENSMUSG00000020387	-0.765565	4.8623	30.118	4.06544e-08	1.19829e-06
8030451A03Rik	10942	ENSMUSG00000073821	-2.33779	0.107339	30.1054	4.09187e-08	1.20134e-06
Gripap1	5785	ENSMUSG00000031153	-0.569805	7.69746	30.0493	4.21193e-08	1.23171e-06
Cd47	34634	ENSMUSG00000055447	-0.804746	5.96076	30.0121	4.29362e-08	1.25232e-06
Tet2	9775	ENSMUSG00000040943	-0.73064	5.66531	29.9725	4.3821e-08	1.2748e-06
Rtp4	34303	ENSMUSG00000033355	-2.51506	6.21829	29.9614	4.40735e-08	1.2773e-06
Spata13	24662	ENSMUSG00000021990	-0.720591	6.3892	29.8617	4.63985e-08	1.33932e-06
Tor3a	1489	ENSMUSG00000060519	-1.76001	7.17806	29.825	4.72844e-08	1.35788e-06
Mtmr14	16239	ENSMUSG00000030269	-0.803067	5.08968	29.3689	5.98294e-08	1.70065e-06
Blcap	5095	ENSMUSG00000067787	-0.687913	5.34892	29.2394	6.39658e-08	1.81361e-06
Siglec1	4560	ENSMUSG00000027322	-1.06921	4.11341	29.186	6.57521e-08	1.85954e-06
Mcl1	9253	ENSMUSG00000038612	-0.650426	9.08503	29.0172	7.1739e-08	2.01356e-06
Malt1	37695	ENSMUSG00000032688	-0.954257	6.44491	28.9573	7.39902e-08	2.07154e-06
Cflar	485	ENSMUSG00000026031	-0.896853	6.19886	28.8621	7.77171e-08	2.16503e-06
Anxa7	23713	ENSMUSG00000021814	-0.739959	7.14834	28.811	7.97963e-08	2.21742e-06
Igf2r	35120	ENSMUSG00000023830	-0.642313	7.01484	28.7921	8.05774e-08	2.23357e-06
Ebi3	36333	ENSMUSG00000003206	-0.888457	3.60073	28.776	8.12518e-08	2.24669e-06
Areg	13720	ENSMUSG00000029378	-2.8465	0.788826	28.6044	8.87823e-08	2.44283e-06
Zbp1	5440	ENSMUSG00000027514	-3.03101	3.61111	28.1242	1.13775e-07	3.08489e-06
Filip1l	34686	ENSMUSG00000043336	-0.945812	4.38698	28.1139	1.14384e-07	3.0939e-06
Herpud1	22850	ENSMUSG00000031770	-0.949435	5.91602	27.9096	1.2712e-07	3.43009e-06
Map3k8	37096	ENSMUSG00000024235	-1.23615	2.64647	27.8316	1.3235e-07	3.55405e-06
Nsmf	2453	ENSMUSG00000006476	-0.689701	4.93253	27.7838	1.35655e-07	3.62536e-06
Pld3	17755	ENSMUSG00000003363	-0.685624	6.45793	27.7588	1.37424e-07	3.66387e-06
Myof	38571	ENSMUSG00000048612	-0.641227	7.68797	27.6089	1.48491e-07	3.94013e-06
Stim2	13412	ENSMUSG00000039156	-0.802148	5.94426	27.5884	1.50074e-07	3.96331e-06
Btg2	1267	ENSMUSG00000020423	-0.901931	3.48028	27.5681	1.51657e-07	3.99565e-06
Irgm2	27899	ENSMUSG00000069874	-2.60759	5.15333	27.5064	1.56578e-07	4.09633e-06
Cxcl16	28320	ENSMUSG00000018920	-0.629928	7.3169	27.4001	1.65422e-07	4.30754e-06
Egr2	20739	ENSMUSG00000037868	-1.71303	3.9068	27.3105	1.73264e-07	4.4908e-06
Nckap1l	33901	ENSMUSG00000022488	-0.577987	8.24299	27.2452	1.79215e-07	4.63429e-06
Tm9sf4	4941	ENSMUSG00000068040	-0.623816	6.81095	27.134	1.89829e-07	4.89741e-06
Trim34b	19305	ENSMUSG00000090215	-2.2727	1.32711	27.0965	1.9355e-07	4.97045e-06
Col27a1	10920	ENSMUSG00000045672	-1.48267	1.62281	27.0635	1.96878e-07	5.04431e-06
Basp1	32843	ENSMUSG00000045763	-0.895534	5.31194	27.0584	1.97404e-07	5.04622e-06
Stk10	27456	ENSMUSG00000020272	-0.630441	6.75261	26.9554	2.08205e-07	5.29628e-06
Slc39a1	9067	ENSMUSG00000052310	-0.580007	7.25959	26.9471	2.09096e-07	5.29663e-06
Metrnl	29931	ENSMUSG00000039208	-1.04852	3.79007	26.9301	2.10946e-07	5.3314e-06
Flt1	14806	ENSMUSG00000029648	-0.613444	7.11774	26.4645	2.68423e-07	6.64868e-06
Procr	5022	ENSMUSG00000027611	-1.15992	4.17092	26.4465	2.70944e-07	6.69628e-06
Rgl1	1436	ENSMUSG00000026482	-0.578613	7.57903	26.3895	2.79052e-07	6.85119e-06
I830012O16Rik	38531	ENSMUSG00000062488	-3.65879	2.90387	26.3693	2.81981e-07	6.90791e-06
Rcan1	34955	ENSMUSG00000022951	-0.750923	7.44463	26.3435	2.85775e-07	6.98554e-06
Vps37a	22193	ENSMUSG00000031600	-0.746539	4.97389	26.2719	2.96569e-07	7.23356e-06
Slc12a4	23004	ENSMUSG00000017765	-0.688143	6.47839	26.0703	3.29208e-07	7.97739e-06
Tmem229b	31941	ENSMUSG00000046157	-0.693937	6.63549	26.0542	3.31965e-07	8.01636e-06
Gm11216	10943	ENSMUSG00000086755	-1.9688	0.538428	25.9749	3.45888e-07	8.29166e-06
Ptprs	36359	ENSMUSG00000013236	-0.550141	7.63847	25.9316	3.53729e-07	8.44338e-06
Tnfrsf1b	12503	ENSMUSG00000028599	-1.5201	3.89284	25.8868	3.62032e-07	8.60481e-06
Polm	27092	ENSMUSG00000020474	-0.768996	3.87241	25.87	3.65197e-07	8.6616e-06
Tasp1	4671	ENSMUSG00000039033	-0.746575	4.75156	25.7253	3.93629e-07	9.27686e-06
Glipr1	21374	ENSMUSG00000056888	-0.578152	7.16559	25.5579	4.29307e-07	1.00121e-05
Tha1	29782	ENSMUSG00000017713	-1.3122	1.53625	25.504	4.4147e-07	1.02743e-05
Slfn4	28729	ENSMUSG00000000204	-1.41877	7.19639	25.3576	4.76281e-07	1.09702e-05
Cntnap5c	36403	ENSMUSG00000038048	-1.79061	0.489832	25.2624	5.00372e-07	1.14308e-05
Tmeff1	10667	ENSMUSG00000028347	-0.676766	5.12603	25.2397	5.06286e-07	1.15423e-05
Stk40	11914	ENSMUSG00000042608	-0.899909	5.62056	25.2281	5.09342e-07	1.15883e-05
Fos	32062	ENSMUSG00000021250	-0.645627	7.07713	25.2212	5.11185e-07	1.16066e-05
2009-09-01	29762	ENSMUSG00000059248	-0.529049	7.8132	25.1683	5.25381e-07	1.19047e-05
Litaf	34020	ENSMUSG00000022500	-0.828686	6.09716	25.0952	5.45694e-07	1.234e-05
Micall1	33356	ENSMUSG00000033039	-0.637303	5.74504	24.8843	6.08768e-07	1.36832e-05
Rgs20	15	ENSMUSG00000002459	-1.75621	0.365516	24.7969	6.37014e-07	1.42322e-05
Ptpre	19907	ENSMUSG00000041836	-1.127	5.34504	24.7675	6.46799e-07	1.44219e-05
Ticam1	36354	ENSMUSG00000047123	-0.723765	4.64083	24.718	6.63618e-07	1.47089e-05
Rffl	28712	ENSMUSG00000020696	-0.934073	3.39431	24.7013	6.69396e-07	1.48076e-05
Lphn2	9904	ENSMUSG00000028184	-1.33364	2.71669	24.6117	7.01255e-07	1.53904e-05
Osgin2	10158	ENSMUSG00000041153	-0.780009	5.09367	24.6043	7.03928e-07	1.54188e-05
Ifit1	38533	ENSMUSG00000034459	-4.02933	5.97442	24.5931	7.08042e-07	1.54785e-05
Tlr9	26594	ENSMUSG00000045322	-0.73107	4.08963	24.5431	7.26668e-07	1.5793e-05
Zeb2	2968	ENSMUSG00000026872	-0.573145	7.32094	24.4294	7.70837e-07	1.6688e-05
Cdk6	12855	ENSMUSG00000040274	-0.666433	4.83852	24.3862	7.883e-07	1.70331e-05
Ralgds	2611	ENSMUSG00000026821	-0.651782	4.93219	24.3402	8.07346e-07	1.74109e-05
Pstpip2	37813	ENSMUSG00000025429	-0.690839	4.63777	24.225	8.57128e-07	1.84134e-05
Arl5c	29113	ENSMUSG00000038352	-1.32823	1.44906	24.151	8.90683e-07	1.90976e-05
Irf9	24549	ENSMUSG00000002325	-1.35422	6.07018	24.1155	9.07282e-07	1.94162e-05
Cln3	19716	ENSMUSG00000030720	-0.629751	6.34066	23.9914	9.67657e-07	2.06686e-05
Helz2	5639	ENSMUSG00000027580	-2.04893	6.66272	23.8866	1.02179e-06	2.17418e-05
Gm17709	23261	ENSMUSG00000091952	-1.22089	4.01397	23.8351	1.04949e-06	2.22887e-05
Sik3	25782	ENSMUSG00000034135	-0.635898	6.99357	23.7924	1.07305e-06	2.27459e-05
Wsb2	14205	ENSMUSG00000029364	-0.628525	5.89313	23.664	1.14707e-06	2.42689e-05
Fosl1	37996	ENSMUSG00000024912	-0.644357	6.44562	23.4638	1.27284e-06	2.68789e-05
Tmem132a	38215	ENSMUSG00000024736	-1.25097	2.17801	23.3662	1.33912e-06	2.80662e-05
Rhbdf1	27445	ENSMUSG00000020282	-0.83426	3.07003	23.3038	1.38324e-06	2.89367e-05
Oas1g	14259	ENSMUSG00000066861	-1.17683	5.74657	23.2399	1.42998e-06	2.9692e-05
Gm12715	11388	ENSMUSG00000059195	-1.09417	4.74887	23.1508	1.49783e-06	3.09856e-05
Ralgapa2	4754	ENSMUSG00000037110	-0.670695	4.12863	23.1425	1.50432e-06	3.10624e-05
Cotl1	23201	ENSMUSG00000031827	-0.547068	7.19258	23.1317	1.51273e-06	3.11785e-05
Clec4a1	16422	ENSMUSG00000049037	-1.49359	1.08548	22.9716	1.64413e-06	3.38243e-05
Oas2	14251	ENSMUSG00000032690	-1.99888	6.87223	22.8539	1.7479e-06	3.58271e-05
Slfn5	28719	ENSMUSG00000054404	-2.08186	5.08528	22.7868	1.81006e-06	3.69656e-05
Tns3	27152	ENSMUSG00000020422	-0.494221	8.69218	22.771	1.82497e-06	3.72021e-05
Abcc1	34076	ENSMUSG00000023088	-0.479187	8.64539	22.6825	1.91097e-06	3.88842e-05
Gramd1b	25660	ENSMUSG00000040111	-0.623167	5.92029	22.6528	1.94075e-06	3.93954e-05
Pip5k1a	9219	ENSMUSG00000028126	-0.607536	6.28172	22.6505	1.94315e-06	3.93954e-05
Bhlhe40	16209	ENSMUSG00000030103	-1.36267	5.37996	22.4641	2.14106e-06	4.30952e-05
Fads3	38188	ENSMUSG00000024664	-0.993094	2.58559	22.3789	2.23824e-06	4.49702e-05
Fam214b	10522	ENSMUSG00000036002	-0.779872	4.39392	22.04	2.67032e-06	5.31732e-05
Npl	1451	ENSMUSG00000042684	-0.642623	4.06896	22.0408	2.6691e-06	5.31732e-05
Nrp2	546	ENSMUSG00000025969	-0.470882	8.96836	22.0178	2.70134e-06	5.35998e-05
Spaca6	35201	ENSMUSG00000080316	-0.776828	4.01489	21.9483	2.80099e-06	5.54785e-05
Osm	27048	ENSMUSG00000058755	-1.14335	2.36214	21.9062	2.86313e-06	5.65089e-05
Ifi202b	1787	ENSMUSG00000026535	-2.32233	4.75643	21.8274	2.98307e-06	5.87723e-05
Serinc2	12041	ENSMUSG00000023232	-0.522529	7.00113	21.744	3.11562e-06	6.1168e-05
null	37382	ENSMUSG00000001379	-0.645728	4.19162	21.7177	3.15871e-06	6.19052e-05
Irf7	20010	ENSMUSG00000025498	-1.80994	6.58759	21.5924	3.37192e-06	6.55091e-05
Zbtb32	17901	ENSMUSG00000006310	-0.666752	7.57375	21.5707	3.41022e-06	6.61381e-05
Arg2	31945	ENSMUSG00000021125	-1.70718	0.670422	21.5552	3.43794e-06	6.65601e-05
Igtp	27898	ENSMUSG00000078853	-2.31314	4.76654	21.4628	3.60766e-06	6.9246e-05
Daxx	35732	ENSMUSG00000002307	-1.41	6.6517	21.4034	3.72118e-06	7.11802e-05
Gm8995	19399	ENSMUSG00000063286	-1.63572	5.7902	21.3302	3.866e-06	7.36982e-05
5830432E09Rik	19909	ENSMUSG00000097471	-1.22253	1.75614	21.2989	3.92965e-06	7.45299e-05
Perm1	12842	ENSMUSG00000078486	-1.6744	2.43582	21.26	4.0102e-06	7.59287e-05
Fhod3	37259	ENSMUSG00000034295	-1.36191	1.57141	21.2226	4.08915e-06	7.7162e-05
AI607873	1781	ENSMUSG00000073490	-2.32778	6.39247	21.1881	4.16333e-06	7.82973e-05
Tubb6	37718	ENSMUSG00000001473	-0.482005	8.5697	21.1614	4.2218e-06	7.92633e-05
Vasp	17450	ENSMUSG00000030403	-0.531616	8.97155	21.1402	4.2688e-06	7.98773e-05
Xaf1	28387	ENSMUSG00000040483	-2.15766	4.87377	20.923	4.78121e-06	8.85753e-05
Mafk	14654	ENSMUSG00000018143	-0.743632	5.48186	20.8823	4.88379e-06	9.03258e-05
Mt1	22844	ENSMUSG00000031765	-0.56752	7.36863	20.8527	4.95991e-06	9.14309e-05
Slfn10-ps	28725	ENSMUSG00000072621	-0.669859	3.83177	20.8086	5.0755e-06	9.32539e-05
Calcrl	3462	ENSMUSG00000059588	-0.732497	6.15854	20.6235	5.59055e-06	0.000102213
Rap1b	21432	ENSMUSG00000052681	-0.707896	8.39412	20.5381	5.84574e-06	0.00010653
Por	14504	ENSMUSG00000005514	-0.481769	7.80296	20.467	6.06693e-06	0.000110054
Znfx1	5320	ENSMUSG00000039501	-1.26984	7.15782	20.3652	6.39812e-06	0.000115653
P2ry6	19127	ENSMUSG00000048779	-0.511194	7.214	20.3213	6.54686e-06	0.00011815
Lamc2	1444	ENSMUSG00000026479	-0.960273	2.67627	20.286	6.66858e-06	0.000119959
Acvrl1	33798	ENSMUSG00000000530	-0.620488	4.82457	20.2684	6.73046e-06	0.000120878
Gbp7	9845	ENSMUSG00000040253	-2.50589	2.16111	20.248	6.80241e-06	0.000121974
Gm16712	36334	ENSMUSG00000097077	-1.03565	1.88344	20.2027	6.96551e-06	0.000124698
Slfn8	28723	ENSMUSG00000035208	-1.75197	5.57808	20.1207	7.27046e-06	0.000129329
Slc3a2	38134	ENSMUSG00000010095	-0.492774	8.40109	20.0429	7.57238e-06	0.000134393
B4galt5	5334	ENSMUSG00000017929	-0.61398	5.59558	20.0342	7.60703e-06	0.000134672
Uba7	26664	ENSMUSG00000032596	-1.54536	5.48405	20.0114	7.69811e-06	0.000136069
Tlr1	13453	ENSMUSG00000044827	-0.70311	3.68026	19.9921	7.77646e-06	0.000137237
Dlgap4	5062	ENSMUSG00000061689	-0.609171	5.93534	19.9738	7.85108e-06	0.000138335
Vegfa	36193	ENSMUSG00000023951	-0.944067	4.84889	19.7318	8.91056e-06	0.000155288
Ddx28	23010	ENSMUSG00000045538	-0.600618	5.38044	19.7153	8.98809e-06	0.00015591
Rhog	19161	ENSMUSG00000073982	-0.49666	6.96353	19.6718	9.1949e-06	0.000158758
Gas7	28173	ENSMUSG00000033066	-0.455171	7.95152	19.6746	9.18146e-06	0.000158758
Zbtb7a	21030	ENSMUSG00000035011	-0.486368	7.54145	19.6446	9.32682e-06	0.000160787
H2-Q7	35891	ENSMUSG00000060550	-0.674862	3.8981	19.6182	9.45634e-06	0.000162768
Irgm1	27640	ENSMUSG00000046879	-2.31839	6.77244	19.5541	9.77925e-06	0.000167809
Kcnd1	5787	ENSMUSG00000009731	-1.37943	0.755312	19.537	9.8669e-06	0.000168925
Usb1	22881	ENSMUSG00000031792	-0.603224	5.51567	19.5355	9.87452e-06	0.000168925
Cebpd	34090	ENSMUSG00000071637	-0.876475	4.92485	19.5208	9.95079e-06	0.00016997
Ubash3b	25674	ENSMUSG00000032020	-0.625262	6.11788	19.4794	1.01691e-05	0.000173335
H2-Q5	35888	ENSMUSG00000055413	-0.823214	2.95932	19.4487	1.03338e-05	0.000175705
Ifi44	9913	ENSMUSG00000028037	-1.65418	7.02031	19.423	1.04738e-05	0.000177546
H2-T23	35940	ENSMUSG00000067212	-0.770894	5.18115	19.2301	1.15869e-05	0.000194936
Ppm1k	15586	ENSMUSG00000037826	-1.15094	3.03091	19.1737	1.19347e-05	0.000200184
Parp14	34446	ENSMUSG00000034422	-2.16612	6.80852	19.1111	1.23327e-05	0.00020624
Mnda	1785	ENSMUSG00000026536	-2.92694	2.09844	19.0716	1.25903e-05	0.000209749
Txnrd1	21095	ENSMUSG00000020250	-0.49798	9.47768	19.0664	1.26249e-05	0.000209869
Wdr1	13321	ENSMUSG00000005103	-0.436864	8.67902	19.0206	1.29317e-05	0.000214333
Gpr68	32192	ENSMUSG00000047415	-0.600767	4.27622	19.0019	1.30589e-05	0.0002158
Igsf6	19642	ENSMUSG00000035004	-0.520655	6.76445	18.9368	1.35118e-05	0.000222626
Tcirg1	37906	ENSMUSG00000001750	-0.600911	8.32154	18.8858	1.38779e-05	0.000228322
Myo1g	27121	ENSMUSG00000020437	-0.55915	6.0172	18.8454	1.41756e-05	0.000232192
Ifih1	3148	ENSMUSG00000026896	-2.53189	6.02647	18.7964	1.45443e-05	0.000237536
Stxbp3a	9574	ENSMUSG00000027882	-0.588755	5.5469	18.7865	1.462e-05	0.000238423
Rnf114	5337	ENSMUSG00000006418	-0.879193	6.43759	18.7658	1.47792e-05	0.000240318
Spp1	13891	ENSMUSG00000029304	-0.558423	11.764	18.6123	1.60183e-05	0.000257839
Gm10425	32474	ENSMUSG00000097081	-1.15623	1.22488	18.5393	1.66433e-05	0.000266746
Ddx58	10400	ENSMUSG00000040296	-2.27323	6.21786	18.4756	1.72094e-05	0.000274638
Psmd8	17827	ENSMUSG00000030591	-0.464308	8.12906	18.4208	1.77115e-05	0.000281845
Lta	35869	ENSMUSG00000024402	-1.49854	0.552682	18.4073	1.78373e-05	0.000283442
Pdgfa	14631	ENSMUSG00000025856	-0.613319	5.52489	18.4008	1.78987e-05	0.000284014
Ksr1	28640	ENSMUSG00000018334	-1.48325	0.551094	18.3788	1.8106e-05	0.000286897
Mitf	16159	ENSMUSG00000035158	-0.579606	6.65653	18.3689	1.82007e-05	0.000287989
Csprs	39079	ENSMUSG00000062783	-1.97377	2.31138	18.3288	1.85879e-05	0.0002937
Fhl3	11878	ENSMUSG00000032643	-0.513137	7.00272	18.2847	1.90231e-05	0.000299728
Psmd10	7816	ENSMUSG00000031429	-0.635962	5.2684	18.2408	1.94662e-05	0.000305847
Samd9l	14867	ENSMUSG00000047735	-1.81808	5.66126	18.1592	2.03187e-05	0.000318345
Sap30	22320	ENSMUSG00000031609	-0.794716	6.64626	18.0297	2.17484e-05	0.000338372
Slc30a1	1985	ENSMUSG00000037434	-0.725154	4.78291	18.0303	2.1742e-05	0.000338372
Ap1s3	759	ENSMUSG00000054702	-0.72322	6.00291	18.0211	2.18467e-05	0.00033943
Zswim4	22689	ENSMUSG00000035671	-0.564704	5.16296	17.9923	2.21797e-05	0.000344124
Ifit3	38529	ENSMUSG00000074896	-3.48942	4.66816	17.8725	2.36204e-05	0.000364452
Itgav	3446	ENSMUSG00000027087	-0.504786	8.51504	17.8623	2.3748e-05	0.000365765
Stac2	29118	ENSMUSG00000017400	-1.01945	1.96538	17.7323	2.54273e-05	0.000390176
Acot7	12718	ENSMUSG00000028937	-0.471901	7.44288	17.7264	2.55063e-05	0.000390851
Fam129b	2776	ENSMUSG00000026796	-0.453993	9.81205	17.481	2.90198e-05	0.000437491
Ifi35	29333	ENSMUSG00000010358	-1.07313	5.45076	17.4054	3.01965e-05	0.000454005
Ube2f	937	ENSMUSG00000034343	-0.532464	6.66449	17.3774	3.06452e-05	0.000460131
Myd88	26881	ENSMUSG00000032508	-0.535709	6.65644	17.3216	3.15572e-05	0.000471921
Apol9a	33296	ENSMUSG00000057346	-3.1039	2.88685	17.3113	3.17301e-05	0.000473873
Oasl2	14133	ENSMUSG00000029561	-2.77217	4.35408	17.0519	3.63712e-05	0.000537995
Gm11545	28963	ENSMUSG00000075611	-0.566539	5.12222	17.0475	3.64571e-05	0.000537995
Pip5k1c	21045	ENSMUSG00000034902	-0.418404	8.76257	16.9978	3.74234e-05	0.000551009
Rhof	14321	ENSMUSG00000029449	-0.638682	6.11695	16.8569	4.03059e-05	0.000590114
Denr	14350	ENSMUSG00000023106	-0.597056	7.67106	16.8072	4.13767e-05	0.000604999
Papd7	30924	ENSMUSG00000034575	-0.793623	6.59183	16.7999	4.15359e-05	0.000606533
Abi1	2405	ENSMUSG00000058835	-0.475069	6.81752	16.7549	4.2533e-05	0.000618667
Stat5a	29293	ENSMUSG00000004043	-0.726689	4.86578	16.5822	4.65861e-05	0.000672369
St7	14982	ENSMUSG00000029534	-0.571849	4.51704	16.5672	4.6955e-05	0.000676818
Il1rl1	333	ENSMUSG00000026069	-0.51974	5.99047	16.4377	5.02748e-05	0.000719104
Eno2	16480	ENSMUSG00000004267	-1.40316	1.20025	16.4153	5.08739e-05	0.000725778
C3ar1	16419	ENSMUSG00000040552	-0.565991	5.41053	16.4129	5.09364e-05	0.000725778
Dnmt3l	20877	ENSMUSG00000000730	-0.754145	2.98455	16.3211	5.34642e-05	0.000756011
Me3	18986	ENSMUSG00000030621	-1.29912	0.575886	16.3165	5.35958e-05	0.000756913
9930022D16Rik	29575	ENSMUSG00000045065	-1.56839	0.177625	16.2104	5.66818e-05	0.000797471
Adar	9043	ENSMUSG00000027951	-1.00446	7.62241	16.1639	5.80905e-05	0.000813195
Sema4d	30640	ENSMUSG00000021451	-0.563812	6.41313	16.1148	5.96152e-05	0.000829559
null	34244	ENSMUSG00000063427	-0.825339	4.85145	16.0917	6.03489e-05	0.000836423
Zglp1	25338	ENSMUSG00000079681	-1.24136	1.16262	16.0354	6.21693e-05	0.000860587
Notch1	2550	ENSMUSG00000026923	-0.786501	3.1532	16.0029	6.3245e-05	0.000874393
Plk2	31268	ENSMUSG00000021701	-1.14633	1.26441	15.9385	6.54328e-05	0.000902407
St3gal6	34691	ENSMUSG00000022747	-0.544725	4.65172	15.8752	6.76603e-05	0.000928942
Rab15	31926	ENSMUSG00000021062	-1.49039	0.480216	15.846	6.87102e-05	0.000941793
Socs1	34010	ENSMUSG00000038037	-2.25497	1.76075	15.8296	6.93115e-05	0.00094887
Trim30a	19312	ENSMUSG00000030921	-1.67426	4.58848	15.8267	6.94176e-05	0.00094916
Nfatc1	37836	ENSMUSG00000033016	-0.523624	9.85554	15.7732	7.14064e-05	0.000973969
Nab2	21540	ENSMUSG00000025402	-0.815806	5.7957	15.7536	7.2152e-05	0.000981742
Mitd1	295	ENSMUSG00000026088	-0.888225	4.86643	15.7211	7.34001e-05	0.000996297
Pacsin1	35551	ENSMUSG00000040276	-1.26047	0.956283	15.7034	7.40897e-05	0.00100444
Grasp	33802	ENSMUSG00000000531	-0.679547	3.30978	15.6878	7.47025e-05	0.00101152
Sla	33133	ENSMUSG00000022372	-0.618882	4.96635	15.5479	8.04406e-05	0.00107746
Isg20	18776	ENSMUSG00000039236	-1.83422	3.15848	15.5043	8.23167e-05	0.00109995
Acp5	25391	ENSMUSG00000001348	-1.12017	1.51473	15.4869	8.30777e-05	0.00110615
B2m	4361	ENSMUSG00000060802	-0.422082	9.10057	15.4664	8.39869e-05	0.0011156
Iffo2	12337	ENSMUSG00000041025	-0.685114	4.84014	15.4434	8.5015e-05	0.00112791
Plekhf1	18052	ENSMUSG00000074170	-0.965069	1.58934	15.3977	8.70956e-05	0.00115005
Emp3	18319	ENSMUSG00000040212	-0.390867	8.54269	15.3776	8.80241e-05	0.00116094
Tspan5	9830	ENSMUSG00000028152	-0.523208	5.23258	15.3704	8.83601e-05	0.00116263
Il15	22635	ENSMUSG00000031712	-1.50758	1.01669	15.2735	9.30114e-05	0.00121809
Gm8113	24075	ENSMUSG00000089901	-2.06006	1.65614	15.2305	9.51561e-05	0.00124472
Gm13822	14134	ENSMUSG00000087477	-1.76363	0.648047	15.2223	9.55697e-05	0.00124721
Rasal1	14249	ENSMUSG00000029602	-1.13173	3.39934	15.2236	9.55005e-05	0.00124721
Smim3	37621	ENSMUSG00000038059	-0.693018	4.66882	15.2004	9.66829e-05	0.00126026
Lgals9	28639	ENSMUSG00000001123	-1.16157	5.11121	15.1789	9.77878e-05	0.0012717
Ahdc1	12121	ENSMUSG00000037692	-0.652425	3.48303	15.1577	9.88963e-05	0.00128462
Ifi44l	9914	ENSMUSG00000039146	-1.89722	3.6741	15.134	0.000100145	0.00129933
Tapbp	35733	ENSMUSG00000024308	-0.648981	7.80656	15.0075	0.000107082	0.00137972
1700034P13Rik	48	ENSMUSG00000097893	-1.07039	1.12902	14.9669	0.000109412	0.00140445
Irf1	27808	ENSMUSG00000018899	-1.36059	4.79425	14.9251	0.000111866	0.00142818
Dhrs3	12500	ENSMUSG00000066026	-0.921515	3.36934	14.9175	0.000112319	0.00143232
Tnip3	15650	ENSMUSG00000044162	-0.441729	7.00834	14.885	0.000114271	0.00145059
Smyd5	15961	ENSMUSG00000033706	-0.421459	6.95335	14.6909	0.000126655	0.00158973
Gpr65	32164	ENSMUSG00000021886	-0.811723	3.15352	14.6858	0.000126998	0.00159225
Rac2	33334	ENSMUSG00000033220	-0.381696	9.03174	14.6138	0.000131944	0.00164686
Gm23201	5324	ENSMUSG00000077565	-0.846108	2.27581	14.5786	0.000134434	0.00167049
Dtx3l	34448	ENSMUSG00000049502	-1.29034	6.01347	14.5582	0.000135898	0.0016868
Dock10	768	ENSMUSG00000038608	-0.591111	7.11042	14.55	0.000136492	0.00169229
Itpkb	1859	ENSMUSG00000038855	-0.724722	5.1398	14.527	0.000138165	0.00170812
Hmcn2	2706	ENSMUSG00000055632	-1.61997	0.882275	14.4981	0.000140298	0.00172988
Serpinb9	30428	ENSMUSG00000045827	-0.617526	3.87544	14.4575	0.000143357	0.00175982
Agpat9	13861	ENSMUSG00000029314	-1.11143	2.98386	14.4355	0.000145046	0.00177665
Rpsa-ps10	9909	ENSMUSG00000047676	-0.578728	4.45526	14.3268	0.000153662	0.00187193
Rsad2	31550	ENSMUSG00000020641	-3.21285	6.21862	14.2971	0.000156108	0.00189487
Elp5	28289	ENSMUSG00000018565	-0.490105	6.05431	14.3009	0.000155793	0.00189487
Stat1	410	ENSMUSG00000026104	-1.28181	6.68944	14.228	0.000161942	0.00195997
Agrn	12839	ENSMUSG00000041936	-0.838437	4.53309	14.1743	0.000166627	0.00199935
Wnt1	33712	ENSMUSG00000022997	-1.27937	1.08413	14.1349	0.000170153	0.00203947
Pqlc1	37832	ENSMUSG00000034006	-0.52813	4.8201	14.1228	0.000171255	0.00204608
Mllt11	9232	ENSMUSG00000053192	-0.518516	5.10683	14.1268	0.000170893	0.00204608
Eif6	5025	ENSMUSG00000027613	-0.44301	7.40362	14.1126	0.000172189	0.00205504
Vhl	16261	ENSMUSG00000033933	-0.498094	4.59664	14.0995	0.000173394	0.00206501
Cited2	20251	ENSMUSG00000039910	-0.392835	9.61524	14.0967	0.000173644	0.00206579
Piezo1	23276	ENSMUSG00000014444	-0.422753	7.14015	14.0834	0.000174876	0.00207824
Actb	14696	ENSMUSG00000029580	-0.470013	12.7151	14.0661	0.000176493	0.00209523
Enpp4	36164	ENSMUSG00000023961	-0.966114	3.36225	14.0446	0.000178529	0.00211042
Ass1	2707	ENSMUSG00000076441	-1.51707	3.47178	14.004	0.000182421	0.00215188
Ercc1	17456	ENSMUSG00000003549	-0.521002	5.52766	13.9795	0.000184818	0.00217327
Cuedc1	28879	ENSMUSG00000018378	-0.625091	3.60111	13.8399	0.000199068	0.00232613
Trim25	28898	ENSMUSG00000000275	-0.885536	7.92596	13.8341	0.000199681	0.00233086
Ddx24	32239	ENSMUSG00000041645	-0.541664	7.6992	13.8215	0.000201018	0.00233913
Hmga1-rs1	29894	ENSMUSG00000078249	-0.430121	7.08831	13.8095	0.000202312	0.00235174
Oas1a	14260	ENSMUSG00000052776	-0.923168	6.29794	13.7512	0.000208686	0.00241578
Slc25a19	29683	ENSMUSG00000020744	-0.51142	4.71944	13.7429	0.000209614	0.00242151
Flnc	15084	ENSMUSG00000068699	-0.933237	3.27654	13.7273	0.000211361	0.00243917
Nek6	2915	ENSMUSG00000026749	-0.480026	5.93684	13.7239	0.000211748	0.00244111
Apobr	19718	ENSMUSG00000042759	-0.41946	7.41189	13.6706	0.000217844	0.00250621
Bst2	22509	ENSMUSG00000046718	-0.702539	6.62785	13.6618	0.000218867	0.00251539
Dusp18	27027	ENSMUSG00000047205	-0.617735	3.21612	13.5848	0.000228021	0.00260453
H2-K1	35744	ENSMUSG00000061232	-0.491354	6.77258	13.5756	0.000229145	0.00261469
Sh2d2a	8940	ENSMUSG00000028071	-1.91339	0.0569183	13.5649	0.000230453	0.00262425
Armc7	29673	ENSMUSG00000057219	-0.482553	4.65092	13.5604	0.000231002	0.00262783
Hspa1b	35832	ENSMUSG00000090877	-0.891705	3.83243	13.557	0.000231432	0.00263003
Parp10	33240	ENSMUSG00000063268	-1.57787	5.19298	13.554	0.000231793	0.00263146
Ppp1r10	35928	ENSMUSG00000039220	-0.432816	6.80663	13.5383	0.00023375	0.00265099
Slc39a13	3831	ENSMUSG00000002105	-0.481661	5.98212	13.5361	0.000234017	0.00265132
Pfkfb3	2259	ENSMUSG00000026773	-0.525469	4.46776	13.519	0.000236159	0.00267149
Pdlim7	30701	ENSMUSG00000021493	-0.489191	6.5686	13.4792	0.00024122	0.00271943
Tmco3	21842	ENSMUSG00000038497	-0.592992	4.42518	13.3753	0.000254956	0.00285955
Rnf213	29825	ENSMUSG00000070327	-1.35229	8.23615	13.3694	0.000255767	0.00286578
Mfsd2a	11827	ENSMUSG00000028655	-0.601422	3.25982	13.3663	0.000256182	0.00286754
Rfwd2	1507	ENSMUSG00000040782	-0.535636	5.62724	13.3357	0.000260403	0.00290316
Cdk18	1225	ENSMUSG00000026437	-0.472647	5.74488	13.3119	0.000263732	0.00293149
Siglece	18158	ENSMUSG00000030474	-0.794932	2.62042	13.2838	0.000267706	0.00296387
Ppp1r15a	18288	ENSMUSG00000040435	-0.485505	4.47961	13.2578	0.000271442	0.00300225
Msantd3	10666	ENSMUSG00000039693	-0.510746	4.68157	13.2402	0.000274012	0.00302469
Dhx58	29284	ENSMUSG00000017830	-1.67353	5.19484	13.2215	0.000276754	0.00305194
Acap1	28280	ENSMUSG00000001588	-1.10112	1.60721	13.2035	0.000279424	0.00307835
Clec5a	15264	ENSMUSG00000029915	-0.403096	9.02605	13.1917	0.000281193	0.00309174
Pvr	17494	ENSMUSG00000040511	-0.503039	4.98933	13.1709	0.000284328	0.00312007
Sgms2	9758	ENSMUSG00000050931	-2.0994	0.20651	13.1646	0.000285282	0.00312747
Stat2	21576	ENSMUSG00000040033	-1.59003	6.00544	13.1291	0.000290737	0.00318102
Car2	8369	ENSMUSG00000027562	-0.413799	8.47669	13.1268	0.000291106	0.00318194
Yam1	36121	ENSMUSG00000098178	-0.673937	9.42397	13.0946	0.000296154	0.00322764
Rtn2	17453	ENSMUSG00000030401	-1.12197	1.14493	13.0881	0.00029717	0.00323242
Ccdc86	38220	ENSMUSG00000024732	-0.44607	7.12873	13.047	0.000303764	0.00330092
Anpep	18798	ENSMUSG00000039062	-0.724507	2.79026	12.9992	0.000311626	0.00337323
Mir221	5976	ENSMUSG00000065422	-1.21035	0.469591	12.9491	0.000320084	0.00344578
Tap1	35763	ENSMUSG00000037321	-1.17298	5.07363	12.949	0.000320098	0.00344578
Ifi204	1782	ENSMUSG00000073489	-2.18712	4.31896	12.7863	0.000349168	0.00371128
Slc9a3r2	35405	ENSMUSG00000002504	-0.916476	2.28361	12.7695	0.000352323	0.0037377
Frmd4a	2050	ENSMUSG00000026657	-0.520152	5.53091	12.751	0.000355821	0.00376765
Fam46a	26356	ENSMUSG00000032265	-1.27175	2.39048	12.7458	0.000356805	0.0037745
Gm6548	36541	ENSMUSG00000091549	-1.26028	4.54758	12.7382	0.000358263	0.00378422
Rgs8	1452	ENSMUSG00000042671	-1.05869	1.24464	12.7191	0.000361939	0.00381435
Trim21	19170	ENSMUSG00000030966	-1.39087	4.16641	12.7133	0.000363062	0.00382259
Lacc1	24899	ENSMUSG00000044350	-0.984667	1.5178	12.7095	0.000363806	0.00382681
Rmdn2	36554	ENSMUSG00000036368	-0.797734	2.84816	12.7077	0.000364161	0.00382694
Sh2d6	15843	ENSMUSG00000052631	-0.966144	2.62585	12.6747	0.000370633	0.00388399
Irak3	21454	ENSMUSG00000020227	-0.654483	3.06624	12.6361	0.000378375	0.00396142
Nabp1	404	ENSMUSG00000026107	-0.710409	3.06109	12.6205	0.000381532	0.00398699
Sgsm1	14083	ENSMUSG00000042216	-0.517313	4.26506	12.5821	0.000389463	0.00405848
Zswim7	28081	ENSMUSG00000014243	-0.607414	3.26289	12.5345	0.000399497	0.00415529
Aebp2	16778	ENSMUSG00000030232	-0.382446	7.6403	12.5226	0.000402059	0.00417805
Gch1	24155	ENSMUSG00000037580	-0.667955	4.84418	12.4736	0.000412738	0.00427709
Rps6ka2	35070	ENSMUSG00000023809	-0.997081	1.29777	12.4619	0.00041534	0.00429608
Ncs1	2705	ENSMUSG00000062661	-0.489135	5.49072	12.3547	0.000439877	0.00450814
Riok3	37162	ENSMUSG00000024404	-0.490458	6.50205	12.3511	0.00044073	0.00450951
Ddah2	35845	ENSMUSG00000007039	-0.960059	2.06398	12.299	0.000453192	0.00461917
Trafd1	14268	ENSMUSG00000042726	-1.19001	6.16605	12.2547	0.00046408	0.00472153
Tor1aip2	1480	ENSMUSG00000050565	-0.569947	7.05978	12.2512	0.00046497	0.00472628
Oas3	14252	ENSMUSG00000032661	-0.999936	6.61428	12.1961	0.000478897	0.00485197
Anxa3	13802	ENSMUSG00000029484	-0.732193	2.72036	12.1954	0.000479073	0.00485197
Dnajb5	10515	ENSMUSG00000036052	-0.803708	2.09646	12.1885	0.000480841	0.00486547
Camk2d	9711	ENSMUSG00000053819	-0.477715	4.62665	12.1039	0.000503157	0.00505919
Dusp1	35511	ENSMUSG00000024190	-0.549348	3.82623	12.0728	0.00051162	0.00512584
9130208D14Rik	19385	ENSMUSG00000086513	-1.61443	1.1082	12.0638	0.000514107	0.00514436
Anxa4	16000	ENSMUSG00000029994	-0.449278	6.40857	12.0069	0.00053005	0.00528047
Ube2e2	23683	ENSMUSG00000058317	-0.542915	3.84241	11.939	0.000549723	0.00544411
Hcls1	34495	ENSMUSG00000022831	-0.457915	8.68224	11.9327	0.000551563	0.00545749
Tyk2	25343	ENSMUSG00000032175	-0.451123	5.84736	11.8724	0.000569722	0.00560737
Dennd4b	9069	ENSMUSG00000042404	-0.443171	6.24592	11.7888	0.000595878	0.00582376
Ttc19	28082	ENSMUSG00000042298	-0.445149	4.55347	11.7572	0.000606077	0.00591826
Lcat	23003	ENSMUSG00000035237	-0.821785	1.74407	11.7453	0.000609955	0.00595092
Dusp16	16714	ENSMUSG00000030203	-0.538059	3.96083	11.7067	0.00062275	0.00605988
Rsbn1	9456	ENSMUSG00000044098	-0.535268	5.21225	11.6968	0.00062607	0.00608688
Syvn1	38039	ENSMUSG00000024807	-0.436265	6.32806	11.6934	0.000627207	0.00609263
Trmt13	9627	ENSMUSG00000033439	-0.536199	3.55203	11.646	0.000643419	0.00621768
Mrpl52	24489	ENSMUSG00000010406	-0.530174	6.16108	11.6413	0.000645018	0.00622774
Itgal	19773	ENSMUSG00000030830	-0.49957	5.09798	11.6131	0.000654903	0.00631227
Ogfr	5607	ENSMUSG00000049401	-0.714175	6.79654	11.6086	0.000656458	0.00631901
P2ry2	19128	ENSMUSG00000032860	-0.789302	1.7633	11.6056	0.000657547	0.0063214
Znrd1	36016	ENSMUSG00000036315	-0.486756	4.71985	11.5387	0.000681638	0.00652462
Daam1	31867	ENSMUSG00000034574	-0.572456	4.26806	11.5064	0.000693572	0.00662213
Rab12	36450	ENSMUSG00000023460	-0.451008	5.5242	11.4917	0.000699065	0.00666106
B3galnt1	8809	ENSMUSG00000043300	-0.938624	0.981227	11.468	0.000708044	0.00673727
Ttyh2	29633	ENSMUSG00000034714	-0.560206	4.79181	11.4298	0.000722769	0.00685404
Slc6a12	16389	ENSMUSG00000030109	-0.336852	8.07326	11.4208	0.00072625	0.0068812
Oas1h	14258	ENSMUSG00000001168	-1.94483	0.465659	11.3892	0.00073873	0.0069876
Pigv	12150	ENSMUSG00000043257	-0.613176	3.56099	11.3697	0.000746515	0.00704334
2011-09-01	13761	ENSMUSG00000058013	-0.358348	7.53599	11.3658	0.000748084	0.00705219
Cmpk2	31551	ENSMUSG00000020638	-2.7978	5.47638	11.3521	0.000753611	0.0070983
Rps16-ps2	14411	ENSMUSG00000060419	-0.552738	4.31678	11.3345	0.000760802	0.00714195
Rnd1	33707	ENSMUSG00000054855	-0.894401	2.63148	11.3082	0.00077164	0.00723153
Rps6ka1	12154	ENSMUSG00000003644	-0.342316	8.18672	11.2895	0.000779465	0.00728653
Tpm4	22535	ENSMUSG00000031799	-0.345869	8.56533	11.2825	0.000782412	0.00730656
St6galnac4	2755	ENSMUSG00000079442	-0.438672	5.53549	11.2626	0.000790855	0.0073521
Ifitm6	19994	ENSMUSG00000059108	-0.540924	3.65738	11.2603	0.00079183	0.00735289
Gm17300	12094	ENSMUSG00000091021	-0.590826	3.11404	11.2539	0.000794566	0.00737217
Ppfibp1	16860	ENSMUSG00000016487	-0.445389	7.36648	11.2421	0.000799609	0.00740053
Klhl12	1280	ENSMUSG00000026455	-0.510754	3.51332	11.2245	0.000807238	0.00746494
Lyrm4	30482	ENSMUSG00000046573	-0.447454	4.98168	11.2134	0.00081207	0.00750342
Rhbdd2	14501	ENSMUSG00000039917	-0.445391	4.34496	11.1983	0.000818718	0.00755235
Fam219a	10449	ENSMUSG00000028439	-0.714151	2.27498	11.1641	0.000833966	0.00768033
Fam133b	12857	ENSMUSG00000058503	-0.469155	5.99439	11.1524	0.000839229	0.00771607
Eif2ak2	36542	ENSMUSG00000024079	-1.03402	6.6339	11.1107	0.000858311	0.00786562
Dancr	13560	ENSMUSG00000053656	-0.534394	3.68546	11.0958	0.000865243	0.00789676
Ppap2c	20915	ENSMUSG00000052151	-0.511282	4.80677	11.0694	0.000877638	0.00798379
Blnk	38617	ENSMUSG00000061132	-0.618686	3.19553	11.0055	0.000908416	0.00823266
Lztfl1	26972	ENSMUSG00000025245	-0.505108	3.87181	10.9717	0.000925128	0.0083681
Casc4	4353	ENSMUSG00000060227	-0.564966	3.23832	10.9691	0.000926419	0.008373
Ak4	11355	ENSMUSG00000028527	-0.47428	4.40663	10.9533	0.000934389	0.0084382
Pomgnt1	11611	ENSMUSG00000028700	-0.431133	6.25171	10.9495	0.000936267	0.00844833
Ier2	22696	ENSMUSG00000053560	-0.450512	5.51556	10.9153	0.000953717	0.00859191
Opn3	1810	ENSMUSG00000026525	-1.10727	2.15539	10.9075	0.000957778	0.00862155
Tanc2	29478	ENSMUSG00000053580	-0.533768	3.51994	10.8587	0.000983329	0.0088302
Asb1	949	ENSMUSG00000026311	-0.53501	3.49681	10.8501	0.000987926	0.00884499
Spty2d1	18346	ENSMUSG00000049516	-0.472663	4.84615	10.8497	0.000988143	0.00884499
Fcer1g	1698	ENSMUSG00000058715	-0.344256	7.79354	10.8432	0.000991574	0.00886859
Zpr1	25788	ENSMUSG00000032078	-0.389903	6.70713	10.8375	0.00099464	0.0088889
Ms4a6c	38235	ENSMUSG00000079419	-0.559505	5.54019	10.8325	0.000997326	0.00890578
4933426M11Rik	31970	ENSMUSG00000021133	-0.423827	5.90192	10.8237	0.00100211	0.00893418
Sys1	5230	ENSMUSG00000045503	-0.441398	4.5944	10.8182	0.00100507	0.00894512
Cadps	23646	ENSMUSG00000054423	-0.574674	3.1937	10.7939	0.00101833	0.00902838
Cdk5r1	28680	ENSMUSG00000048895	-0.861913	2.6415	10.7765	0.00102795	0.00910648
Phf11d	24646	ENSMUSG00000068245	-1.14733	5.56375	10.7047	0.00106866	0.0094
Cers6	3211	ENSMUSG00000027035	-0.377246	6.80775	10.7	0.00107136	0.00940892
Fscn1	14697	ENSMUSG00000029581	-0.800252	1.54008	10.6763	0.00108515	0.00952254
Gyk	6973	ENSMUSG00000025059	-0.537862	5.51416	10.668	0.00109006	0.00955813
Slc39a4	33267	ENSMUSG00000063354	-1.26193	0.815588	10.6574	0.00109632	0.00960551
Ccnd2	16541	ENSMUSG00000000184	-1.48856	0.237755	10.582	0.00114197	0.00994303
Ptpn7	1294	ENSMUSG00000031506	-0.359468	7.37254	10.5719	0.00114818	0.00998937
Cd9	16521	ENSMUSG00000030342	-0.371452	8.84698	10.5405	0.00116788	0.0101292
Padi2	12368	ENSMUSG00000028927	-0.749893	2.26788	10.4998	0.00119388	0.0103226
Syt16	31895	ENSMUSG00000044912	-0.909751	1.22324	10.4432	0.00123099	0.0106188
Dgke	28899	ENSMUSG00000000276	-0.493833	3.99271	10.4303	0.00123962	0.0106686
Wdr77	9486	ENSMUSG00000000561	-0.331304	7.79007	10.4196	0.00124684	0.0107142
Csnk2a2	22884	ENSMUSG00000046707	-0.410807	6.39473	10.3582	0.00128901	0.0110257
Jund	22471	ENSMUSG00000071076	-0.441865	6.17162	10.3335	0.0013064	0.0111493
Pofut2	20843	ENSMUSG00000020260	-0.378356	6.61816	10.3334	0.00130646	0.0111493
Tpt1-ps3	16172	ENSMUSG00000084319	-0.454393	4.43183	10.3129	0.00132102	0.0112564
Lgals3bp	29796	ENSMUSG00000033880	-0.650894	7.45271	10.3038	0.00132755	0.0113034
Pim2	5789	ENSMUSG00000031155	-0.620153	3.79625	10.2954	0.00133362	0.0113378
Kdm5b	1285	ENSMUSG00000042207	-0.887134	1.71874	10.2795	0.00134513	0.0114096
Zmynd15	28321	ENSMUSG00000040829	-0.458203	4.26667	10.2807	0.00134428	0.0114096
Jarid2	30551	ENSMUSG00000038518	-0.572315	6.55883	10.172	0.00142588	0.0120306
Ifngr2	34931	ENSMUSG00000022965	-0.341936	7.51765	10.1475	0.00144493	0.0121638
Sgtb	31223	ENSMUSG00000042743	-0.758119	1.96305	10.0925	0.00148876	0.0124763
Tmem98	28683	ENSMUSG00000035413	-0.711516	2.41054	10.0742	0.00150356	0.0125909
Carhsp1	33988	ENSMUSG00000008393	-0.504407	4.81594	9.98045	0.00158211	0.0132091
St3gal3	11693	ENSMUSG00000028538	-0.443097	4.46282	9.92132	0.00163375	0.0135996
Gramd1a	17940	ENSMUSG00000001248	-0.431707	5.7132	9.90974	0.00164406	0.013665
Il1rap	34324	ENSMUSG00000022514	-0.427193	4.54308	9.87514	0.00167527	0.0139037
H2-Q6	35890	ENSMUSG00000073409	-0.462976	4.28226	9.86321	0.00168617	0.0139838
Rgcc	24920	ENSMUSG00000022018	-1.05199	0.925646	9.84486	0.00170307	0.014103
Top1	5149	ENSMUSG00000070544	-0.342498	7.92801	9.83783	0.00170959	0.0141256
Hipk2	15231	ENSMUSG00000061436	-0.422137	5.76599	9.81767	0.00172843	0.0142392
Rgs1	1391	ENSMUSG00000026358	-0.848269	1.54748	9.79909	0.00174599	0.0143732
Zc3hav1	15219	ENSMUSG00000029826	-0.603981	7.70172	9.75421	0.00178912	0.0147066
Micall2	14651	ENSMUSG00000036718	-0.47658	3.86857	9.74481	0.0017983	0.0147495
Zfand3	35627	ENSMUSG00000044477	-0.409183	5.85287	9.72713	0.00181568	0.0148702
Igf2bp2	34263	ENSMUSG00000033581	-0.998964	3.15236	9.70142	0.00184126	0.0150356
Etv6	16707	ENSMUSG00000030199	-0.404587	6.36152	9.69819	0.00184449	0.015051
Tmem26	20747	ENSMUSG00000060044	-0.463918	6.54574	9.69668	0.00184602	0.0150525
Hip1r	14352	ENSMUSG00000000915	-0.779563	1.7859	9.68769	0.00185507	0.0150932
Gpr157	12680	ENSMUSG00000047875	-1.06565	0.446077	9.66169	0.0018815	0.0152527
Ppp1r1a	33903	ENSMUSG00000022490	-1.12312	0.139478	9.64714	0.00189646	0.0153444
Rab8b	26113	ENSMUSG00000036943	-0.421878	6.67815	9.56914	0.00197876	0.0159256
Slc9a4	336	ENSMUSG00000026065	-0.451899	4.83586	9.56708	0.00198098	0.015932
Psma6	31730	ENSMUSG00000021024	-0.34976	7.75533	9.54026	0.00201013	0.0161316
Pydc4	1778	ENSMUSG00000073491	-0.828189	3.86577	9.53506	0.00201584	0.0161426
Tmem62	4317	ENSMUSG00000054484	-0.538685	3.21744	9.48738	0.0020689	0.0164742
Gm11127	35943	ENSMUSG00000079492	-0.462698	4.9417	9.45191	0.00210929	0.0167588
Ddx60	22349	ENSMUSG00000037921	-2.18499	1.60782	9.43573	0.00212798	0.0168953
Parp9	34449	ENSMUSG00000022906	-1.11959	6.1681	9.42413	0.00214149	0.0169904
Plekhn1	12843	ENSMUSG00000078485	-0.652486	4.43359	9.41894	0.00214755	0.0170265
P4ha1	20634	ENSMUSG00000019916	-0.333374	6.97269	9.3341	0.00224929	0.01777
Abi2	515	ENSMUSG00000026782	-0.418377	5.18173	9.31972	0.002267	0.0178847
Rpl31-ps8	33615	ENSMUSG00000067870	-0.792912	3.23175	9.30859	0.00228082	0.0179556
Cbwd1	38425	ENSMUSG00000024878	-0.428739	4.76559	9.30627	0.00228371	0.0179657
Zufsp	20424	ENSMUSG00000039531	-0.736624	3.33097	9.29208	0.00230146	0.0180418
Tpm1	26117	ENSMUSG00000032366	-0.327476	7.53028	9.2742	0.00232405	0.0181934
Atp9b	37837	ENSMUSG00000024566	-0.386718	6.01318	9.25681	0.00234621	0.018354
Rrad	22938	ENSMUSG00000031880	-0.708783	2.86132	9.2537	0.00235021	0.0183724
H2-T24	35939	ENSMUSG00000053835	-0.985028	4.94507	9.24359	0.00236321	0.0184611
Ccnj	38613	ENSMUSG00000025010	-0.532318	4.13548	9.23744	0.00237117	0.0185103
Vps37c	38210	ENSMUSG00000048832	-0.397456	5.09352	9.20957	0.00240753	0.0187288
Tnfrsf12a	35342	ENSMUSG00000023905	-0.444683	5.34778	9.16047	0.00247298	0.0191553
Aqp9	26162	ENSMUSG00000032204	-1.27739	0.762585	9.15456	0.00248099	0.019178
Ly6g5b	35853	ENSMUSG00000043807	-1.20519	0.282083	9.15071	0.00248622	0.019178
Layn	25840	ENSMUSG00000060594	-0.983302	1.55949	9.15136	0.00248534	0.019178
Kansl1l	614	ENSMUSG00000026004	-0.433348	3.86139	9.15166	0.00248493	0.019178
Fam96b	22939	ENSMUSG00000031879	-0.42188	5.77344	9.13592	0.00250639	0.019283
Rusc2	10528	ENSMUSG00000035969	-0.410019	4.87647	9.13684	0.00250514	0.019283
Anxa2	26135	ENSMUSG00000032231	-0.319125	9.29699	9.11899	0.0025297	0.0194088
Cebpb	5348	ENSMUSG00000056501	-0.45219	5.63513	9.06589	0.00260422	0.0199258
Nfkbil1	35871	ENSMUSG00000042419	-0.420988	5.42528	9.03588	0.00264731	0.0202002
Bcorl1	6352	ENSMUSG00000036959	-0.521593	3.59367	9.00627	0.00269055	0.0204924
Emr1	36399	ENSMUSG00000004730	-0.359077	6.71198	9.00494	0.0026925	0.0204924
Mthfs	26415	ENSMUSG00000066442	-0.72488	1.99172	8.99532	0.00270672	0.0205833
Dip2c	29990	ENSMUSG00000048264	-0.406822	4.85159	8.99068	0.0027136	0.0206215
Fbxw17	30623	ENSMUSG00000037816	-0.684829	4.06018	8.98539	0.00272147	0.0206532
Anxa1	38380	ENSMUSG00000024659	-0.330888	7.6794	8.97934	0.00273049	0.0206936
Zbtb17	12396	ENSMUSG00000006215	-0.372635	5.46705	8.9668	0.0027493	0.0207797
Gm24270	25915	ENSMUSG00000076281	-0.705859	5.39162	8.9447	0.00278276	0.0210174
A530040E14Rik	807	ENSMUSG00000072109	-1.25712	1.55567	8.9177	0.0028242	0.0212416
Prdx1	11629	ENSMUSG00000028691	-0.470253	10.0405	8.91189	0.0028332	0.0212843
Pim3	33568	ENSMUSG00000035828	-0.403542	5.48193	8.90199	0.0028486	0.0213855
Gm22	23263	ENSMUSG00000043903	-0.890452	1.28361	8.89921	0.00285294	0.0213894
Ifi203	1786	ENSMUSG00000039997	-1.67913	5.91916	8.8926	0.00286329	0.0214526
Bend6	236	ENSMUSG00000042182	-0.658344	2.06822	8.86073	0.00291372	0.0218012
H2-D1	35879	ENSMUSG00000073411	-0.340868	8.59758	8.85668	0.00292018	0.0218349
BC051226	35731	ENSMUSG00000092564	-0.911805	0.838866	8.84939	0.00293186	0.0219026
Actr3	1151	ENSMUSG00000026341	-0.326044	9.03995	8.84776	0.00293449	0.0219026
A430104N18Rik	28860	ENSMUSG00000084796	-0.476029	3.96538	8.83781	0.00295053	0.0219882
Znrf3	27077	ENSMUSG00000041961	-0.407548	4.47834	8.82453	0.00297208	0.0221341
Dennd5b	16893	ENSMUSG00000030313	-0.646196	2.3586	8.81653	0.00298514	0.0222018
Rbpj	13409	ENSMUSG00000039191	-0.302084	8.96998	8.78117	0.00304356	0.0225761
C5ar1	17365	ENSMUSG00000049130	-0.466146	7.59358	8.76069	0.00307792	0.0227705
Myl12a	36478	ENSMUSG00000024048	-0.299264	8.15037	8.7624	0.00307505	0.0227705
Mob3b	10360	ENSMUSG00000073910	-0.872842	2.74203	8.72231	0.0031434	0.0231781
Rpl9-ps6	38495	ENSMUSG00000062456	-0.637851	2.24223	8.67966	0.00321781	0.0236332
Ryr1	17817	ENSMUSG00000030592	-0.565739	3.03382	8.66139	0.00325024	0.0238074
Irf8	23226	ENSMUSG00000041515	-0.378877	6.66445	8.64708	0.00327586	0.0239181
Pdrg1	4936	ENSMUSG00000027472	-0.373599	5.6589	8.64353	0.00328225	0.023949
Tnfrsf4	12828	ENSMUSG00000029075	-0.953734	0.611066	8.63987	0.00328886	0.023966
Tbc1d10a	27045	ENSMUSG00000034412	-0.413667	4.15933	8.63062	0.00330559	0.0240565
Gm15427	1008	ENSMUSG00000081051	-0.603189	3.98739	8.62642	0.00331322	0.0240807
Grina	33241	ENSMUSG00000022564	-0.399489	5.43045	8.59694	0.00336728	0.0244259
Magohb	16658	ENSMUSG00000030188	-0.496011	3.65228	8.58987	0.00338039	0.0244892
Ptpn23	26765	ENSMUSG00000036057	-0.382004	6.2353	8.58795	0.00338395	0.0244991
Cd300lb	29641	ENSMUSG00000063193	-0.294163	8.56996	8.57373	0.00341048	0.0246751
Sppl2a	4429	ENSMUSG00000027366	-0.40603	6.60127	8.57107	0.00341546	0.0246952
Lck	12012	ENSMUSG00000000409	-0.701811	1.87205	8.56468	0.00342747	0.0247399
Micu3	22189	ENSMUSG00000039478	-0.526258	3.58122	8.56492	0.00342702	0.0247399
Dcp2	37506	ENSMUSG00000024472	-0.510865	6.02062	8.55354	0.00344852	0.0248218
1500012F01Rik	5321	ENSMUSG00000074578	-0.571232	5.84111	8.5147	0.00352289	0.0252757
Alas1	26595	ENSMUSG00000032786	-0.384797	5.96543	8.50951	0.00353295	0.0253315
Eif1	29264	ENSMUSG00000035530	-0.389775	8.18256	8.50738	0.00353709	0.025345
Sat1	8090	ENSMUSG00000025283	-0.504081	6.28688	8.50054	0.00355042	0.0254079
Prdx5	38083	ENSMUSG00000024953	-0.431132	6.38206	8.47682	0.00359701	0.0256919
Sepw1	17351	ENSMUSG00000041571	-0.463549	5.0753	8.46227	0.0036259	0.0258652
Rgs3	10909	ENSMUSG00000059810	-0.391715	4.90365	8.44486	0.00366076	0.0260973
Gucy2g	38815	ENSMUSG00000055523	-0.964337	0.499615	8.43157	0.00368762	0.0262719
Gabarapl1	16609	ENSMUSG00000030161	-0.376908	6.05653	8.42955	0.00369171	0.0262843
5430427O19Rik	6980	ENSMUSG00000025058	-0.398305	4.92442	8.42333	0.00370438	0.0263366
Lamc1	1445	ENSMUSG00000026478	-0.29036	8.05461	8.42247	0.00370613	0.0263366
Pex12	28737	ENSMUSG00000018733	-0.38546	4.29726	8.39825	0.00375583	0.0266052
Sptbn2	37954	ENSMUSG00000067889	-1.07708	1.00593	8.38327	0.00378691	0.0267744
Trim34a	19300	ENSMUSG00000056144	-1.54331	1.3371	8.35887	0.00383809	0.0270461
Zfhx2	24529	ENSMUSG00000040721	-0.410718	4.20597	8.34774	0.00386167	0.0271825
Herc6	15588	ENSMUSG00000029798	-1.03775	3.34307	8.3248	0.00391074	0.0274408
Gm9843	34796	ENSMUSG00000050299	-0.408387	4.91046	8.32519	0.00390991	0.0274408
Nle1	28715	ENSMUSG00000020692	-0.385989	6.33119	8.30967	0.00394345	0.0276017
Psme2	24547	ENSMUSG00000079197	-0.404089	6.55106	8.2985	0.00396779	0.0277546
Gm5431	27641	ENSMUSG00000058163	-1.90594	1.81923	8.26872	0.0040334	0.0281431
Lpl	22407	ENSMUSG00000015568	-0.314204	10.3351	8.2508	0.00407341	0.0283546
Lins	18706	ENSMUSG00000053091	-0.463955	3.64167	8.24377	0.0040892	0.0284319
Herc4	20720	ENSMUSG00000020064	-0.382787	6.19933	8.23724	0.00410396	0.0285107
Mdm2	21429	ENSMUSG00000020184	-0.316362	7.15296	8.22835	0.00412409	0.028615
Maml2	25202	ENSMUSG00000031925	-1.03124	0.21702	8.21069	0.00416443	0.028877
Sf3b4	9274	ENSMUSG00000068856	-0.285658	8.4255	8.18877	0.00421504	0.0291736
Gm20204	23172	ENSMUSG00000098148	-0.363887	5.00724	8.18224	0.00423025	0.0292427
Tbc1d1	13445	ENSMUSG00000029174	-0.373767	5.93781	8.16144	0.00427904	0.0295251
Ptgir	17386	ENSMUSG00000043017	-0.370734	5.08003	8.15283	0.00429939	0.0296472
Sin3b	22560	ENSMUSG00000031622	-0.365948	6.25332	8.14606	0.00431549	0.0297215
Ifitm2	19991	ENSMUSG00000060591	-0.315471	7.22891	8.14616	0.00431525	0.0297215
Ube2l6	3478	ENSMUSG00000027078	-0.609646	5.12976	8.14253	0.00432389	0.0297443
Pex26	16383	ENSMUSG00000067825	-0.503812	3.28655	8.14244	0.00432412	0.0297443
null	9057	ENSMUSG00000078667	-0.485435	3.19935	8.12294	0.00437085	0.0299551
Stambpl1	38520	ENSMUSG00000024776	-0.390507	5.6556	8.1237	0.00436904	0.0299551
Fdx1l	25339	ENSMUSG00000079677	-0.386105	6.07915	8.11984	0.00437834	0.029988
Pex5	16460	ENSMUSG00000005069	-0.364173	5.46204	8.08532	0.00446252	0.0304525
Rassf8	16844	ENSMUSG00000030259	-0.483652	5.13218	8.07717	0.00448264	0.0305525
Ccdc137	29860	ENSMUSG00000049957	-0.360298	5.81394	8.0777	0.00448134	0.0305525
Rrp9	26606	ENSMUSG00000041506	-0.385531	6.59981	8.07544	0.00448693	0.0305631
Rasal2	1495	ENSMUSG00000070565	-0.392071	4.3833	8.04554	0.00456157	0.0309959
Slc27a3	9072	ENSMUSG00000027932	-0.641405	2.41676	8.03484	0.00458861	0.0311417
Sra1	37381	ENSMUSG00000006050	-0.357589	5.60636	8.03518	0.00458775	0.0311417
Dhps	22730	ENSMUSG00000060038	-0.358623	5.48297	8.03297	0.00459334	0.031155
Slc25a25	2748	ENSMUSG00000026819	-0.364436	5.46211	8.02994	0.00460103	0.0311881
Serpinb9b	30429	ENSMUSG00000021403	-0.872317	1.07838	8.01611	0.0046363	0.0313892
Gm17435	22553	ENSMUSG00000097000	-0.864915	1.68796	8.00872	0.00465527	0.0314985
9330175E14Rik	22852	ENSMUSG00000097194	-0.965108	1.78956	8.00009	0.00467749	0.0315914
Cstb	20889	ENSMUSG00000005054	-0.334369	6.94611	7.99051	0.00470231	0.0317207
6530402F18Rik	2634	ENSMUSG00000079499	-0.800155	1.07238	7.98694	0.00471159	0.0317641
Rnf185	27002	ENSMUSG00000020448	-0.385511	4.3068	7.98265	0.00472277	0.0318203
Eif4a-ps4	522	ENSMUSG00000082209	-0.462622	5.74627	7.97217	0.0047502	0.0319858
Slc7a7	24488	ENSMUSG00000000958	-0.584117	3.67434	7.95998	0.0047823	0.0321632
Noc4l	14031	ENSMUSG00000033294	-0.345182	6.79382	7.95738	0.00478916	0.03219
Rps6-ps4	3346	ENSMUSG00000081406	-0.376192	5.99863	7.91775	0.00489522	0.0327844
Ubxn11	12165	ENSMUSG00000012126	-0.523248	2.83118	7.91378	0.00490597	0.0328368
Ifi47	27651	ENSMUSG00000078920	-1.28683	2.74187	7.9005	0.00494212	0.0330589
Arpc5	1440	ENSMUSG00000008475	-0.291372	8.71006	7.88674	0.00497985	0.0332516
Shisa5	26724	ENSMUSG00000025647	-0.396892	7.10955	7.874	0.00501507	0.0334468
Rdh5	21622	ENSMUSG00000025350	-1.01419	0.182841	7.83725	0.00511803	0.0340724
Etnk1	16810	ENSMUSG00000030275	-0.443612	6.73731	7.79554	0.00523753	0.0347643
Med29	17789	ENSMUSG00000003444	-0.381546	4.79937	7.7734	0.00530213	0.0351097
Otud5	5788	ENSMUSG00000031154	-0.331635	6.63664	7.74286	0.00539255	0.0356029
Cdc42ep4	29621	ENSMUSG00000041598	-0.367446	5.32469	7.73577	0.00541374	0.0357006
Rassf1	26642	ENSMUSG00000010067	-0.468028	4.11562	7.71209	0.00548523	0.0360869
Gm24357	25237	ENSMUSG00000064797	-0.542061	2.85292	7.68835	0.00555784	0.0364367
Clec12a	16600	ENSMUSG00000053063	-0.346534	6.626	7.68526	0.00556735	0.0364768
Rps2	35413	ENSMUSG00000044533	-0.275005	8.51783	7.6802	0.00558301	0.0365579
Txlnb	20253	ENSMUSG00000039891	-0.975962	0.180782	7.67434	0.00560116	0.0366338
Acot9	8092	ENSMUSG00000025287	-0.355313	5.46133	7.67473	0.00559994	0.0366338
6230400D17Rik	23721	ENSMUSG00000097577	-0.789118	1.01939	7.67242	0.00560713	0.0366514
M6pr	16398	ENSMUSG00000007458	-0.286196	8.94229	7.66608	0.00562685	0.0367562
Themis2	12112	ENSMUSG00000037731	-0.53349	5.8564	7.66071	0.00564363	0.0368253
Stat3	29294	ENSMUSG00000004040	-0.401821	5.65346	7.65617	0.00565785	0.036875
Uxt	6016	ENSMUSG00000001134	-0.389958	4.04803	7.65179	0.00567161	0.0369217
Srf	36218	ENSMUSG00000015605	-0.340337	6.57439	7.65222	0.00567026	0.0369217
Vta1	20243	ENSMUSG00000019868	-0.360767	5.06078	7.62366	0.00576073	0.0374364
Lrp10	24492	ENSMUSG00000022175	-0.343613	6.52902	7.60864	0.00580893	0.0377057
Tnfsf9	36391	ENSMUSG00000035678	-0.41369	5.08567	7.59602	0.00584974	0.0379045
Gm11613	29089	ENSMUSG00000085586	-0.628519	1.90205	7.58843	0.00587442	0.0380424
4930404N11Rik	21052	ENSMUSG00000020234	-0.823751	2.11758	7.58421	0.00588816	0.0380432
Nop16	30666	ENSMUSG00000025869	-0.290472	7.57005	7.58519	0.00588499	0.0380432
Slc25a43	6179	ENSMUSG00000037636	-0.553613	2.47721	7.58049	0.00590033	0.0380998
Eftud1	18863	ENSMUSG00000038563	-0.374151	5.50999	7.56109	0.00596418	0.0384232
Npc2	32041	ENSMUSG00000021242	-0.379032	7.59765	7.54536	0.00601649	0.0386279
Gm13841	14177	ENSMUSG00000083833	-0.27117	8.09273	7.54768	0.00600875	0.0386279
A230028O05Rik	34313	ENSMUSG00000096960	-0.483121	3.07305	7.53913	0.00603732	0.0386769
Eml2	17445	ENSMUSG00000040811	-0.384223	5.14418	7.54048	0.00603281	0.0386769
BC022687	32511	ENSMUSG00000037594	-0.821082	1.94497	7.53478	0.00605192	0.0387427
Etf1	37346	ENSMUSG00000024360	-0.284612	8.72156	7.5156	0.0061167	0.0391126
Fam210b	5420	ENSMUSG00000027495	-0.550303	2.59877	7.47571	0.0062537	0.03992
Pear1	8937	ENSMUSG00000028073	-0.913031	0.65479	7.46922	0.00627626	0.0399955
Slc25a33	12668	ENSMUSG00000028982	-0.410311	3.86911	7.46989	0.00627394	0.0399955
Ppfia3	18271	ENSMUSG00000003863	-0.860516	1.09261	7.46591	0.00628783	0.0400035
Diexf	2001	ENSMUSG00000016181	-0.348341	6.17326	7.44667	0.0063554	0.0403158
Rps3a2	24944	ENSMUSG00000062611	-0.323027	6.77701	7.44059	0.00637688	0.0404292
Crtc2	9068	ENSMUSG00000027936	-0.340795	6.50325	7.42998	0.0064146	0.0405992
Psmd11	28679	ENSMUSG00000017428	-0.281366	8.20345	7.42424	0.0064351	0.0406734
Ctsz	5468	ENSMUSG00000016256	-0.287936	9.54536	7.42241	0.00644164	0.0406781
Ipo5	25094	ENSMUSG00000030662	-0.273475	8.75056	7.41705	0.00646087	0.0407535
Jag1	4654	ENSMUSG00000027276	-0.509024	5.31149	7.40548	0.00650255	0.0409701
Rc3h2	2897	ENSMUSG00000075376	-0.371454	5.48755	7.39009	0.00655843	0.0412524
Lsp1	20068	ENSMUSG00000018819	-0.328138	6.99442	7.39059	0.00655659	0.0412524
Cnot7	22192	ENSMUSG00000031601	-0.367572	6.42721	7.36868	0.00663697	0.0416401
Eaf1	23858	ENSMUSG00000021890	-0.296384	6.97228	7.36421	0.00665347	0.0417093
Myo9b	22496	ENSMUSG00000004677	-0.297596	6.97892	7.35543	0.00668606	0.0418901
Ddhd1	24130	ENSMUSG00000037697	-0.407836	4.18646	7.35312	0.00669466	0.0419205
Cd207	15928	ENSMUSG00000034783	-1.19561	0.579428	7.31937	0.00682153	0.0425717
Apbb2	13482	ENSMUSG00000029207	-0.377393	4.65089	7.31965	0.00682046	0.0425717
Rap2c	6389	ENSMUSG00000050029	-0.37346	6.00694	7.32002	0.00681906	0.0425717
Gm14286	5094	ENSMUSG00000087445	-0.78471	1.01178	7.30879	0.00686182	0.0427753
Wdr47	9568	ENSMUSG00000040389	-0.372862	4.11083	7.30354	0.00688191	0.0428527
Adcy7	22789	ENSMUSG00000031659	-0.277508	8.52247	7.30362	0.00688158	0.0428527
Zfp513	13182	ENSMUSG00000043059	-0.358869	5.42595	7.30035	0.00689411	0.0428802
Slc6a13	16387	ENSMUSG00000030108	-0.375734	5.18879	7.26381	0.00703577	0.0435197
Gm16754	25346	ENSMUSG00000097439	-0.708304	1.5718	7.26151	0.00704481	0.0435515
Rwdd4a	22275	ENSMUSG00000031568	-0.352742	6.28471	7.23061	0.00716709	0.0441122
Prkcg	16925	ENSMUSG00000078816	-0.381795	3.98833	7.22834	0.00717616	0.0441437
Mbnl2	25089	ENSMUSG00000022139	-0.327557	6.70048	7.21941	0.00721193	0.0443393
Dtwd1	4414	ENSMUSG00000023330	-0.375453	4.26442	7.21792	0.00721792	0.0443517
Dcp1a	23824	ENSMUSG00000021962	-0.332418	5.6722	7.20872	0.00725503	0.0445256
Gm12174	27617	ENSMUSG00000080776	-0.981955	0.537801	7.20205	0.00728205	0.0446475
Gm10288	9901	ENSMUSG00000070343	-0.691616	2.6041	7.20076	0.00728727	0.044655
Arl5b	2301	ENSMUSG00000017418	-0.371829	4.11927	7.19656	0.00730434	0.0447351
Gas2l3	21179	ENSMUSG00000074802	-0.343461	5.81413	7.18035	0.00737064	0.0450177
Trim12c	19307	ENSMUSG00000057143	-0.765548	3.99136	7.17285	0.0074015	0.0451815
Bcar3	9675	ENSMUSG00000028121	-1.25388	4.40526	7.16841	0.00741985	0.0452599
Zfp516	37855	ENSMUSG00000058881	-0.433504	3.38464	7.16778	0.00742244	0.0452599
Mxd1	15997	ENSMUSG00000001156	-0.699603	2.67438	7.15674	0.00746829	0.0454403
Cldn25	34696	ENSMUSG00000022744	-0.361116	5.15934	7.14427	0.00752039	0.0457075
Zdhhc18	12147	ENSMUSG00000037553	-0.34933	5.88406	7.14029	0.00753708	0.045741
Adam17	31514	ENSMUSG00000052593	-0.294763	7.6786	7.14003	0.0075382	0.045741
Map2k1	26053	ENSMUSG00000004936	-0.345611	6.94704	7.13169	0.00757331	0.0458545
Syne2	31905	ENSMUSG00000063450	-0.822588	1.06324	7.12705	0.00759295	0.0459236
Pgm1	13441	ENSMUSG00000029171	-0.343171	5.65046	7.07338	0.00782375	0.0470647
Rhob	31420	ENSMUSG00000054364	-0.522669	2.78251	7.06671	0.00785294	0.0471641
Crlf3	28669	ENSMUSG00000017561	-0.337908	6.13388	7.06786	0.0078479	0.0471641
Dnmt3a	31382	ENSMUSG00000020661	-0.341459	7.22438	7.04279	0.00795849	0.0476188
Trim56	14549	ENSMUSG00000043279	-0.550267	5.97175	7.0366	0.00798606	0.0477582
Serpinb1b	30430	ENSMUSG00000051029	-0.800821	0.776969	7.03246	0.00800455	0.0478432
Fam53c	37341	ENSMUSG00000034300	-0.35468	5.54235	7.01208	0.00809617	0.0482616
Nt5dc3	21145	ENSMUSG00000054027	-0.325395	5.42187	7.01044	0.00810356	0.0482799
Rpl13-ps3	24639	ENSMUSG00000059835	-0.870134	1.21298	6.99782	0.00816089	0.0485956
Slc41a1	1217	ENSMUSG00000013275	-0.36558	4.63966	6.98795	0.00820601	0.0487862
Gpr85	14961	ENSMUSG00000048216	-0.61866	2.24595	6.98398	0.00822427	0.0488688
Gm12918	10077	ENSMUSG00000066315	-0.64061	2.6399	6.97769	0.00825321	0.0489855
Csnk2b	35854	ENSMUSG00000024387	-0.291334	7.42477	6.97451	0.00826788	0.0490236
Mvp	19751	ENSMUSG00000030681	-0.368709	6.25157	6.97322	0.00827386	0.0490331
Pik3ap1	38622	ENSMUSG00000025017	-0.356999	6.08213	6.96078	0.00833156	0.0492705
Sh3pxd2b	27453	ENSMUSG00000040711	-0.334043	6.38512	6.95376	0.00836431	0.0494214
Rpl39-ps	33868	ENSMUSG00000036305	-0.507999	2.6616	6.94672	0.0083973	0.0495773
Masp2	12634	ENSMUSG00000028979	-0.512524	2.51973	6.93795	0.0084386	0.0496668
Gm15832	320	ENSMUSG00000085894	-0.49683	2.75755	6.93958	0.00843091	0.0496668
Mapk11	33581	ENSMUSG00000053137	-0.493117	3.11611	6.93867	0.00843517	0.0496668
9930104L06Rik	11894	ENSMUSG00000044730	-0.387292	4.25515	6.93299	0.00846199	0.0497783
Cox17	34517	ENSMUSG00000046516	-0.486035	3.1203	6.92676	0.00849155	0.0498733
Trim26	36007	ENSMUSG00000024457	-0.459038	6.38086	6.92707	0.00849006	0.0498733
Sp140	823	ENSMUSG00000070031	-0.958797	4.29874	6.92442	0.00850265	0.0499123
Alpk2	37693	ENSMUSG00000032845	-0.507577	2.74403	6.91749	0.00853568	0.0500536
Fau	38042	ENSMUSG00000038274	-0.280786	8.82185	6.90416	0.00859954	0.0504016
Mex3c	37757	ENSMUSG00000037253	-0.337048	5.9121	6.87456	0.00874311	0.0510823
Degs1	1895	ENSMUSG00000038633	-0.316637	7.39636	6.85473	0.00884068	0.0514907
Fabp5	8335	ENSMUSG00000027533	-0.504786	5.19868	6.84096	0.00890912	0.0518623
Rps14	37627	ENSMUSG00000024608	-0.266271	9.01323	6.83839	0.0089219	0.0519097
Ssr2	8984	ENSMUSG00000041355	-0.264248	8.31107	6.82605	0.00898377	0.0522152
Ptpn22	9453	ENSMUSG00000027843	-0.285609	7.45874	6.79671	0.0091326	0.053051
Gan	23171	ENSMUSG00000052557	-0.404591	3.5848	6.78567	0.00918923	0.0532384
Cyfip1	18402	ENSMUSG00000030447	-0.262425	8.09899	6.78407	0.00919749	0.0532384
Ubc	14386	ENSMUSG00000008348	-0.30354	6.8296	6.77652	0.00923647	0.0534338
Eif5a	28284	ENSMUSG00000078812	-0.305764	11.1569	6.7741	0.009249	0.0534786
Sema4c	269	ENSMUSG00000026121	-0.523851	2.64044	6.75664	0.00933994	0.0539765
Aen	18775	ENSMUSG00000030609	-0.313624	7.13344	6.70637	0.00960693	0.0553762
Rab11fip4os1	28655	ENSMUSG00000087434	-0.664631	1.45214	6.68303	0.0097335	0.0559614
Aig1	20235	ENSMUSG00000019806	-0.413502	3.53281	6.67819	0.00975999	0.056056
5730508B09Rik	9729	ENSMUSG00000050549	-0.461007	3.60078	6.67062	0.00980153	0.0562079
Cacna1b	2440	ENSMUSG00000004113	-1.04636	-0.279764	6.64869	0.00992285	0.0567377
Ensa	9252	ENSMUSG00000038619	-0.314047	6.67926	6.63829	0.00998095	0.0570318
Mov10	9471	ENSMUSG00000002227	-0.664192	5.70469	6.6365	0.00999099	0.0570426
Anxa5	8516	ENSMUSG00000027712	-0.295036	9.51392	6.63613	0.00999306	0.0570426
Ndel1	28197	ENSMUSG00000018736	-0.332646	5.61065	6.62566	0.010052	0.0573205
Btg3	34808	ENSMUSG00000022863	-0.582316	2.12927	6.62413	0.0100606	0.0573235
Cyp51	12871	ENSMUSG00000001467	-0.356225	6.11938	6.61029	0.0101391	0.0576996
Sass6	9628	ENSMUSG00000027959	-0.58096	6.36195	6.59267	0.0102399	0.0582139
Cpeb4	27438	ENSMUSG00000020300	-0.355074	4.26095	6.58154	0.0103042	0.0584621
Amfr	22837	ENSMUSG00000031751	-0.318566	6.74145	6.57136	0.0103633	0.0587059
Dnajb13	19114	ENSMUSG00000030708	-0.767084	0.949483	6.56444	0.0104037	0.0588452
Rps13-ps2	18976	ENSMUSG00000069972	-0.750386	1.31563	6.54213	0.0105349	0.0594704
Tfe3	5784	ENSMUSG00000000134	-0.279309	7.3906	6.52699	0.0106249	0.0597941
Grwd1	18313	ENSMUSG00000053801	-0.310255	6.57396	6.52444	0.0106402	0.0598497
Gm14963	38062	ENSMUSG00000085196	-1.04816	0.07014	6.51308	0.0107084	0.0600821
C920009B18Rik	20314	ENSMUSG00000097352	-0.404336	3.89855	6.50283	0.0107703	0.0603385
Kcnn4	17635	ENSMUSG00000054342	-0.278039	8.40124	6.48497	0.0108791	0.0609173
AW209491	30036	ENSMUSG00000039182	-0.361956	3.97632	6.47793	0.0109222	0.0610976
Gas5	1527	ENSMUSG00000053332	-0.282393	8.38043	6.47076	0.0109664	0.061314
Sec11c	37698	ENSMUSG00000024516	-0.32212	7.21643	6.46792	0.0109839	0.0613814
Cdip1	33949	ENSMUSG00000004071	-0.347416	5.02847	6.46441	0.0110056	0.0614175
Eif3k	17815	ENSMUSG00000053565	-0.271024	7.57042	6.46421	0.0110069	0.0614175
Ubtd2	27454	ENSMUSG00000044949	-0.671945	2.058	6.44998	0.0110954	0.0617879
Ccdc94	36335	ENSMUSG00000003208	-0.333701	4.48658	6.42207	0.0112711	0.0625791
Airn	35121	ENSMUSG00000078247	-0.73287	0.802975	6.4061	0.0113729	0.063019
Phf11c	24647	ENSMUSG00000091144	-0.799788	2.79957	6.39941	0.0114158	0.0631858
Ccrn4l	8608	ENSMUSG00000023087	-0.29165	8.10696	6.38433	0.0115132	0.0635155
Rasa4	14521	ENSMUSG00000004952	-0.312613	6.58252	6.38146	0.0115319	0.0635605
Pard6b	5358	ENSMUSG00000044641	-0.447072	2.9342	6.36491	0.0116399	0.0640222
Plekha5	16776	ENSMUSG00000030231	-0.351311	4.15188	6.36404	0.0116456	0.0640222
Pdlim5	9843	ENSMUSG00000028273	-0.328857	5.41226	6.35745	0.011689	0.0641974
Ceacam19	17493	ENSMUSG00000049848	-0.88316	0.0989836	6.35031	0.0117361	0.0644053
Shox2	8772	ENSMUSG00000027833	-0.798542	0.535242	6.34769	0.0117535	0.0644248
Naa25	14269	ENSMUSG00000042719	-0.353959	6.65776	6.31709	0.011958	0.0654494
Gm15764	34174	ENSMUSG00000087556	-0.923988	0.109443	6.31236	0.0119899	0.0655923
Pik3r6	28192	ENSMUSG00000046207	-0.491057	4.03952	6.31033	0.0120036	0.0656352
Mapkbp1	4289	ENSMUSG00000033902	-0.339089	4.59661	6.2944	0.012112	0.0660338
2310047M10Rik	28211	ENSMUSG00000045176	-0.426983	3.14693	6.29154	0.0121316	0.0661082
Apba3	21042	ENSMUSG00000004931	-0.363264	4.89431	6.28616	0.0121684	0.0662445
Ifit2	38528	ENSMUSG00000045932	-1.78765	5.23331	6.27536	0.0122428	0.0665197
Gm13456	2952	ENSMUSG00000082536	-0.850403	1.35227	6.27431	0.0122501	0.066527
Ece2	34232	ENSMUSG00000022842	-0.334614	4.96785	6.25926	0.0123546	0.0670617
Ppp1r13b	32490	ENSMUSG00000021285	-0.466306	3.65826	6.24683	0.0124416	0.0674181
Cdc37	25344	ENSMUSG00000019471	-0.256852	8.80363	6.23394	0.0125325	0.0678296
Cd74	37629	ENSMUSG00000024610	-0.2658	7.72554	6.22714	0.0125807	0.0679587
Gng5	9893	ENSMUSG00000068523	-0.311656	6.14931	6.22121	0.0126229	0.0681209
1810022K09Rik	8363	ENSMUSG00000078784	-0.343718	4.84043	6.21827	0.0126438	0.068201
Acy1	26600	ENSMUSG00000023262	-0.327465	5.19583	6.21065	0.0126984	0.0684623
H13	4921	ENSMUSG00000019188	-0.254667	7.91648	6.19439	0.0128156	0.0689943
Ptpn12	12995	ENSMUSG00000028771	-0.353389	6.12641	6.17532	0.0129544	0.0695407
Ipo4	24551	ENSMUSG00000002319	-0.285102	7.16662	6.17333	0.012969	0.0695856
Tmem86a	18347	ENSMUSG00000010307	-0.700839	1.21556	6.15728	0.0130872	0.0700513
Bet1l	19982	ENSMUSG00000025484	-0.359115	3.80223	6.14088	0.0132092	0.0706704
Zbtb49	13313	ENSMUSG00000029127	-0.512409	2.46852	6.09542	0.0135533	0.0722351
Mtf1	11886	ENSMUSG00000028890	-0.334602	4.88003	6.09582	0.0135502	0.0722351
Camk1d	2077	ENSMUSG00000039145	-0.315151	6.21865	6.09541	0.0135534	0.0722351
Nlrc5	22853	ENSMUSG00000074151	-0.689754	4.43768	6.09395	0.0135646	0.0722603
Pold4	37939	ENSMUSG00000024854	-0.334647	4.147	6.08625	0.0136238	0.0725064
Leprotl1	22153	ENSMUSG00000031513	-0.369139	5.84541	6.05559	0.0138624	0.0735311
Gm26909	22034	ENSMUSG00000097839	-0.796663	0.62496	6.0391	0.0139924	0.074045
Mlxip	14333	ENSMUSG00000038342	-0.31668	6.04931	6.02247	0.0141249	0.0746436
Chmp4b	4986	ENSMUSG00000038467	-0.315344	7.44356	6.02238	0.0141255	0.0746436
Cmtr1	35622	ENSMUSG00000024019	-0.582345	2.09569	6.02018	0.0141432	0.0747015
H2-Q10	35894	ENSMUSG00000067235	-0.847554	1.83228	6.01649	0.0141728	0.0747873
Dhx34	17362	ENSMUSG00000006019	-0.297446	6.99242	6.0018	0.0142913	0.0752583
Pkd1l2	23167	ENSMUSG00000034416	-0.415174	3.73921	5.98701	0.0144116	0.0758325
Sh3kbp1	8148	ENSMUSG00000040990	-0.391005	4.61142	5.95555	0.0146711	0.0769077
Snhg12	12086	ENSMUSG00000086290	-0.334133	4.99965	5.94049	0.0147969	0.0774583
Tatdn2	16264	ENSMUSG00000056952	-0.276994	7.0157	5.93197	0.0148686	0.0777973
Olfr933	25605	ENSMUSG00000058515	-0.600793	2.03212	5.92777	0.0149041	0.0778617
Ppp1r11	36015	ENSMUSG00000036398	-0.319262	6.26955	5.91901	0.0149784	0.0781522
Nip7	23040	ENSMUSG00000031917	-0.312503	6.61032	5.91087	0.0150477	0.0784771
Ctsb	24708	ENSMUSG00000021939	-0.253424	9.70303	5.90475	0.0151001	0.0786402
Mcts2	4922	ENSMUSG00000042814	-0.474579	2.55439	5.88655	0.015257	0.0792583
Kremen1	27075	ENSMUSG00000020393	-0.421229	3.62738	5.88604	0.0152614	0.0792583
Fndc3a	24853	ENSMUSG00000033487	-0.428933	5.93019	5.86534	0.0154419	0.0801213
Snora78	35415	ENSMUSG00000089255	-0.933074	0.186497	5.84339	0.0156356	0.0810016
null	24815	ENSMUSG00000098872	-0.773052	0.493357	5.84284	0.0156405	0.0810016
Hspa8	25667	ENSMUSG00000015656	-0.289539	11.1654	5.82384	0.0158104	0.0818434
Phf11b	24645	ENSMUSG00000091649	-1.15647	2.71548	5.81576	0.0158832	0.082144
Mtus2	14810	ENSMUSG00000029651	-0.336978	4.08668	5.79741	0.0160498	0.0828524
Map1b	31176	ENSMUSG00000052727	-0.63486	1.84463	5.79034	0.0161144	0.0830324
Gna13	29574	ENSMUSG00000020611	-0.287825	7.16584	5.79114	0.0161072	0.0830324
Kctd21	19042	ENSMUSG00000044952	-0.629183	1.60718	5.78605	0.0161539	0.0831973
Ift57	34631	ENSMUSG00000032965	-0.324167	4.59071	5.77228	0.0162809	0.0836203
Cfl1	38002	ENSMUSG00000056201	-0.271569	10.8041	5.76599	0.0163393	0.083843
Bri3	14735	ENSMUSG00000047843	-0.400013	4.58366	5.76391	0.0163586	0.0839038
Sfn	12146	ENSMUSG00000047281	-0.72313	0.896071	5.75806	0.0164132	0.0841062
Otub2	32237	ENSMUSG00000021203	-0.519191	2.20651	5.75123	0.0164771	0.0843566
Pla2g5	12313	ENSMUSG00000041193	-0.639649	1.68436	5.74357	0.0165492	0.0846865
Ero1l	24122	ENSMUSG00000021831	-0.267161	7.01027	5.73064	0.0166715	0.0851563
Ppif	23766	ENSMUSG00000021868	-0.299086	6.02694	5.72174	0.0167561	0.0855107
Clcn5	5753	ENSMUSG00000004317	-0.450735	4.33443	5.7175	0.0167966	0.0856388
Afp	13704	ENSMUSG00000054932	-0.555393	2.26548	5.7118	0.0168513	0.0858392
Tacc2	19851	ENSMUSG00000030852	-0.309771	5.32367	5.69089	0.0170532	0.0867099
Parp3	26605	ENSMUSG00000023249	-0.399556	3.49478	5.69009	0.017061	0.0867101
Tarm1	16930	ENSMUSG00000053338	-0.651172	1.15626	5.6849	0.0171115	0.0868271
Gm10499	35954	ENSMUSG00000073403	-0.512044	2.54606	5.67265	0.0172314	0.0872978
[truncated: 10,101 more rows]

## Sheet: WTvp65 unstimulated
gene	order	genes	logFC	logCPM	LR	PValue	FDR
[truncated: 11,150 more rows]

[truncated: 4 more sheets: H2BvWT unstimulated, H2Bvp65 unstimulated, gene ontology down regulated, gene ontology up regulated]
